# Supplementary material for: Catalyst- and solvent-free Csp2–H functionalization of 4-hydroxycoumarins via C-3 dehydrogenative aza-coupling under ball-milling
Source: Royal Society of Chemistry journal article supplement (doi:10.1039/d1gc01341f), 2021-01-01
Supplement: d1gc01341f1.pdf [file d1gc01341f1.pdf]

## Supplementary Information

### Catalyst- and solvent-free C<sub>sp2</sub>-H functionalization of 4-hydroxycoumarins via C-3 dehydrogenative aza-coupling under ball-milling<sup>#</sup>

Goutam Brahmachari\*, Indrajit Karmakar and Pintu Karmakar

Laboratory of Natural Products & Organic Synthesis, Department of Chemistry,  
Visva-Bharati (a Central University), Santiniketan-731 235, West Bengal, India.

\*Corresponding author: Prof. Dr. Goutam Brahmachari

(<http://orcid.org/0000-0001-9925-6281>)

E-mail: brahmg2001@yahoo.co.in; goutam.brahmachari@visva-bharati.ac.in

<sup>#</sup>This paper is dedicated to Professor Vinod K. Singh on the occasion of his 62<sup>nd</sup> birthday

### Table of Contents

|   |                                                                                                                                                                                                              |         |
|---|--------------------------------------------------------------------------------------------------------------------------------------------------------------------------------------------------------------|---------|
| 1 | General experimental .....                                                                                                                                                                                   | S2      |
| 2 | General procedure for the synthesis of substituted ( <i>E</i> )-3-(2-arylhydrazono)chroman-2,4-diones ( <b>4</b> ).....                                                                                      | S2      |
| 3 | Gram-scale synthesis of compound <b>4c</b> .....                                                                                                                                                             | S2      |
| 4 | The physical and spectral data of all the synthesized compounds, substituted ( <i>E</i> )-3-(2-arylhydrazono)chroman-2,4-diones <b>4</b> ( <b>4a</b> – <b>4u</b> ).....                                      | S2-S6   |
| 5 | Scanned copies of <sup>1</sup> H NMR, <sup>13</sup> C NMR, DEPT-135, <sup>19</sup> F NMR and HRMS spectra for all the synthesized compounds <b>4</b> ( <b>4a</b> – <b>4u</b> ) ( <b>Figure S1–S85</b> )..... | S7-S91  |
| 6 | Single X-ray crystal structure analysis of ( <i>E</i> )-3-(2-(3,5-bis(trifluoromethyl)phenyl)hydrazono)chroman-2,4-dione ( <b>4k</b> ).....                                                                  | S92-S93 |
| 7 | Calculation of E-factors for all the synthesized compounds <b>4</b> ( <b>4a</b> – <b>4u</b> ) .....                                                                                                          | S93-S94 |
| 8 | References.....                                                                                                                                                                                              | S95     |

**1 General experimental.** All chemicals (analytical grade) were purchased from reputed companies and used without further purification. <sup>1</sup>H, <sup>13</sup>C, DEPT-135 and <sup>19</sup>F NMR spectra were collected at 400 MHz 100 MHz and 376 MHz, respectively, on a Bruker DRX spectrometer using DMSO-*d*<sub>6</sub> and CDCl<sub>3</sub> as solvents. Chemical shifts were reported in δ (ppm), relative to the internal standard, TMS. The signals observed are described as s (singlet), d (doublet), t (triplet), and m (multiplet). Coupling constants are reported as *J* value in Hz. Mass spectrometry was acquired on a Microtek Q-ToF Micro YA 263 Waters spectrometer. X-ray single crystallographic data were collected on X'Calibur CCD area-detector diffractometer. The melting points were recorded on a Chemiline CL-725 melting point apparatus and are uncorrected. Thin Layer Chromatography (TLC) was performed using silica gel 60 F<sub>254</sub> (Merck) plates. A PM 100, Retsch GmbH, Germany, ball-milling apparatus was used for all reactions.

## **2 General procedure for the synthesis of substituted (*E*)-3-(2-arylhydrazono)chroman-2,4-diones (**4**)**

A mixture of 4-hydroxycoumarins (**1**; 3.0 mmol), aromatic primary amines (**2**; 3.0 mmol) and *tert*-butyl nitrite (**3**; 3.0 mmol; d: 0.867g/mL; Purity: 90%) was subjected to ball-milling at 500 rpm using a 25 mL stainless steel jar with seven balls (10 mm in diameter) of the same material for 4-6 min. The ball-milling operation was performed using inverted rotation direction, with an interval of 1 min and taking a break of 10 sec. The progress of the reaction was monitored by TLC. On completion of the reaction, the crude product was added with 10 mL of aqueous ethanol (1 : 1 v/v), shaken well to dissolve out unreacted reactants and other intermediates/impurities, and then filtered off the undissolved solid mass to obtain pure products **4** (**4a** – **4u**) upon drying in the open-air. All the structures of the synthesized compounds were confirmed by spectroscopic studies, including <sup>1</sup>H-NMR, <sup>13</sup>C-NMR, DEPT-135, <sup>19</sup>F-NMR (for fluorine atom-containing molecules such as **4i**, **4j**, **4k**, **4o**, **4p**, and **4u**), and HRMS. Further structural confirmation for a representative entry, (*E*)-3-(2-(3,5-bis(trifluoromethyl)phenyl)hydrazono)chroman-2,4-dione (**4k**), based on single X-ray crystallographic studies, was also supplemented.

## **3 Gram-scale synthesis of compound 4c**

A mixture of 4-hydroxycoumarin (**1a**; 5.0 mmol; 0.810 g), *p*-toluidine (**2c**; 5.0 mmol; 0.535 g) and *tert*-butyl nitrite (**3**; 5.0 mmol; 0.575 g) was ball-milled in a 25 mL stainless steel jar with seven balls (10 mm in diameter) of the same material at 500 rpm for 6 min in a similar fashion as described earlier. On completion of the reaction (as monitored by TLC), the crude product was added with 15 mL of aqueous ethanol (1 : 1 v/v), shaken well, filtered-off and dried to have the desired product, (*E*)-3-(2-(*p*-tolyl)hydrazono)chroman-2,4-dione (**4c**) in pure form with 94% of yield (1.313 g).

## **4 The physical and spectral data of all the synthesized compounds 4 (4a – 4u) are given below:**

(*E*)-3-(2-phenylhydrazono)chroman-2,4-dione (**4a**). Reddish yellow amorphous solid; yield: 88% (702 mg; 3.0 mmol scale); mp = 165-166 °C. <sup>1</sup>H NMR (400 MHz, DMSO-*d*<sub>6</sub>): δ = 15.66 (br s, 1H, -NH), 7.93 (d, 1H, *J* = 7.2 Hz, Ar-H), 7.41-7.69 (m, 3H, Ar-H), 7.49 (t, 2H, *J* = 7.6 Hz, Ar-H), 7.36-7.30 (m, 3H, Ar-H) ppm. <sup>13</sup>C{<sup>1</sup>H} NMR (100 MHz, DMSO-*d*<sub>6</sub>): δ = 177.57 (oxo CO), 158.24 (lactone CO), 154.00 (C), 140.87 (C), 136.38 (CH), 129.90 (2C, CH), 127.87 (CH), 126.37 (CH), 124.63 (CH), 122.50 (C), 120.16 (C), 117.86 (2C, CH), 117.31 (CH) ppm. HRMS: *m/z* 289.0584 [M + Na]<sup>+</sup> calcd for C<sub>15</sub>H<sub>10</sub>N<sub>2</sub>O<sub>3</sub>Na, found: *m/z* 289.0597.

(*E*)-3-(2-(4-bromophenyl)hydrazono)chroman-2,4-dione (**4b**). Bright yellow amorphous solid; yield: 85% (880 mg; 3.0 mmol scale); mp = 245-247 °C. <sup>1</sup>H NMR (400 MHz, DMSO-*d*<sub>6</sub>): δ = 15.47 (br s, 1H, -NH), 7.99 (d, 1H, *J* = 7.2 Hz, Ar-H), 7.79-7.75 (m, 1H, Ar-H), 7.71 (br s, 4H, Ar-H), 7.41-7.35 (m, 2H, Ar-H) ppm. <sup>13</sup>C{<sup>1</sup>H} NMR (100 MHz, CDCl<sub>3</sub>): δ = 178.89 (oxo CO), 159.02 (lactone CO), 154.64 (C), 139.74 (C), 136.66 (CH), 133.18 (2C, CH), 127.04 (CH), 124.90 (CH), 122.79 (C), 122.09 (C), 121.69 (C), 119.55 (2C, CH), 117.85 (CH) ppm. HRMS:

$m/z$  344.9875  $[M + H]^+$  calcd for  $C_{15}H_9BrN_2O_3H$ , found:  $m/z$  344.9856;  $m/z$  346.9875  $[M + 2 + H]^+$  calcd for  $C_{15}H_9BrN_2O_3H$ , found:  $m/z$  346.9834.

(*E*)-3-(2-(*p*-tolyl)hydrazono)chroman-2,4-dione (**4c**). Yellow amorphous solid; yield: 88% (702 mg; 3.0 mmol scale); mp = 165-166 °C.  $^1H$  NMR (400 MHz, DMSO- $d_6$ ):  $\delta$  = 15.79 (br s, 1H, -NH), 7.98-7.96 (m, 1H, Ar-H), 7.77-7.73 (m, 1H, Ar-H), 7.62 (d, 2H,  $J$  = 8.4 Hz, Ar-H), 7.39-7.31 (m, 4H, Ar-H), 2.33 (s, 3H, Ar-CH<sub>3</sub>) ppm.  $^{13}C\{^1H\}$  NMR (100 MHz, DMSO- $d_6$ ):  $\delta$  = 177.43 (oxo CO), 158.34 (lactone CO), 153.98 (C), 138.62 (C), 137.94 (C), 136.27 (CH), 130.40 (2C, CH), 126.33 (CH), 124.63 (CH), 122.07 (C), 120.21 (C), 117.88 (2C, CH), 117.30 (CH), 20.75 (Ar-CH<sub>3</sub>) ppm. HRMS:  $m/z$  281.0926  $[M + H]^+$  calcd for  $C_{16}H_{12}N_2O_3H$ , found:  $m/z$  281.0928

(*E*)-3-(2-(4-methoxyphenyl)hydrazono)chroman-2,4-dione (**4d**). Brick red amorphous solid; yield: 94% (835 mg; 3.0 mmol scale); mp = 183-184 °C.  $^1H$  NMR (400 MHz, DMSO- $d_6$ ):  $\delta$  = 16.02 (br s, 1H, -NH), 7.99 (d, 1H,  $J$  = 7.6 Hz, Ar-H), 7.77-7.71 (m, 3H, Ar-H), 7.40-7.34 (m, 2H, Ar-H), 7.10 (d, 2H,  $J$  = 8.8 Hz, Ar-H), 3.81 (s, 3H, Ar-OCH<sub>3</sub>) ppm.  $^{13}C\{^1H\}$  NMR (100 MHz, DMSO- $d_6$ ):  $\delta$  = 176.98 (oxo CO), 159.28 (C), 158.36 (lactone CO), 153.86 (C), 135.98 (CH), 134.23 (C), 126.15 (CH), 124.50 (CH), 121.50 (C), 120.16 (C), 119.64 (2C, CH), 117.20 (CH), 115.18 (2C, CH), 55.58 (Ar-OCH<sub>3</sub>) ppm. HRMS:  $m/z$  319.0695  $[M + Na]^+$  calcd for  $C_{16}H_{12}N_2O_4Na$ , found:  $m/z$  319.0696.

(*E*)-3-(2-(3-(methylthio)phenyl)hydrazono)chroman-2,4-dione (**4e**). Mahogany red amorphous solid; yield: 81% (758 mg; 3.0 mmol scale); mp = 191-192 °C.  $^1H$  NMR (400 MHz, DMSO- $d_6$ ):  $\delta$  = 15.51 (br s, 1H, -NH), 7.99 (d, 1H,  $J$  = 4.4 Hz, Ar-H), 7.78-7.75 (m, 1H, Ar-H), 7.62 (br s, 1H, Ar-H), 7.51-7.49 (m, 1H, Ar-H), 7.46-7.36 (m, 1H, Ar-H), 7.21 (d, 1H,  $J$  = 4.4 Hz, Ar-H), 2.53 (s, 3H, Ar-H) ppm.  $^{13}C\{^1H\}$  NMR (100 MHz, DMSO- $d_6$ ):  $\delta$  = 177.63 (oxo CO), 158.31 (lactone CO), 154.02 (C), 141.65 (C), 140.62 (C), 140.57 (CH), 136.44 (C), 136.40 (CH), 130.25 (CH), 126.44 (CH), 124.68 (CH), 120.25 (C), 117.34 (CH), 114.53 (CH), 114.04 (CH), 14.45 (Ar-CH<sub>3</sub>) ppm. HRMS:  $m/z$  313.0647  $[M + H]^+$  calcd for  $C_{16}H_{12}N_2O_3SH$ , found:  $m/z$  313.0648

(*E*)-3-(2-(4-(methylthio)phenyl)hydrazono)chroman-2,4-dione (**4f**). Crimson red amorphous solid; yield: 84% (786 mg; 3.0 mmol scale); mp = 202-205 °C.  $^1H$  NMR (400 MHz, DMSO- $d_6$ ):  $\delta$  = 15.79 (br s, 1H, -NH), 7.98 (d, 1H,  $J$  = 7.2 Hz, Ar-H), 7.77-7.73 (m, 1H, Ar-H), 7.69 (d, 2H,  $J$  = 8.0 Hz, Ar-H), 7.39-7.34 (m, 4H, Ar-H), 2.51 (s, 3H, Ar-SCH<sub>3</sub>) ppm.  $^{13}C\{^1H\}$  NMR (100 MHz, DMSO- $d_6$ ):  $\delta$  = 177.32 (oxo CO), 158.28 (lactone CO), 153.95 (C), 138.66 (C), 138.01 (C), 136.21 (CH), 126.75 (2C, CH), 126.28 (CH), 124.59 (CH), 122.13 (C), 120.21 (C), 118.48 (2C, CH), 117.27 (CH), 14.59 (Ar-SCH<sub>3</sub>) ppm. HRMS:  $m/z$  313.0647  $[M + H]^+$  calcd for  $C_{16}H_{12}N_2O_3SH$ , found:  $m/z$  313.0648.

(*E*)-3-(2-(2-nitrophenyl)hydrazono)chroman-2,4-dione (**4g**). Yellow amorphous solid; yield: 95% (883 mg; 3.0 mmol scale); mp = 275-276 °C.  $^1H$  NMR (400 MHz, CDCl<sub>3</sub>):  $\delta$  = 16.76 (br s, 1H, -NH), 8.48 (d, 1H,  $J$  = 8.4 Hz, Ar-H), 8.35-8.33 (m, 1H, Ar-H), 8.23-8.19 (m, 1H, Ar-H), 7.83-7.79 (m, 1H, Ar-H), 7.74-7.69 (m, 1H, Ar-H), 7.46-7.40 (m, 1H, Ar-H), 7.38-7.34 (m, 1H, Ar-H), 7.31 (d, 1H,  $J$  = 8.4 Hz, Ar-H) ppm.  $^{13}C$  NMR spectrum was not recorded due to poor solubility of the compound in deuterated solvents.  $\square$ HRMS:  $m/z$  334.0440  $[M + Na]^+$  calcd for  $C_{15}H_9N_3O_5Na$ , found:  $m/z$  334.0441.

(*E*)-3-(2-(4-nitrophenyl)hydrazono)chroman-2,4-dione (**4h**). Medallion yellow amorphous solid; yield: 93% (868 mg; 3.0 mmol scale); mp = 270-272 °C.  $^1H$  NMR (400 MHz, DMSO- $d_6$ ):  $\delta$  = 15.17 (br s, 1H, -NH), 8.36 (d, 1H,  $J$  = 8.8 Hz, Ar-H), 8.00 (d, 1H,  $J$  = 7.6 Hz, Ar-H), 7.94 (d, 2H,  $J$  = 8.8 Hz, Ar-H), 7.81-7.77 (m, 1H, Ar-H), 7.42-7.36 (m, 2H, Ar-H) ppm.  $^{13}C$  NMR spectrum was not recorded due to poor solubility of the compound in deuterated solvents. HRMS:  $m/z$  312.0620  $[M + H]^+$  calcd for  $C_{15}H_9N_3O_5H$ , found:  $m/z$  312.0621.

(*E*)-3-(2-(4-(trifluoromethoxy)phenyl)hydrazono)chroman-2,4-dione (**4i**). Golden yellow amorphous solid; yield: 87% (914 mg; 3.0 mmol scale); mp = 235-236 °C.  $^1H$  NMR (400 MHz, DMSO- $d_6$ ):  $\delta$  = 15.49 (br s, 1H, -

*NH*), 8.01 (d, 1H,  $J = 7.6$  Hz, Ar-H), 7.88 (d, 2H,  $J = 8.8$  Hz, Ar-H), 7.80-7.76 (m, 1H, Ar-H), 7.54 (d, 2H,  $J = 8.8$  Hz, Ar-H), 7.42-7.36 (m, 2H, Ar-H) ppm.  $^{13}\text{C}\{^1\text{H}\}$  NMR (100 MHz,  $\text{CDCl}_3$ ):  $\delta = 178.92$  (oxo CO), 158.95 (lactone CO), 154.66 (C), 148.67 (C), 139.13 (C), 136.73 (CH), 127.05 (CH), 124.92 (CH), 122.90 (C), 122.61 (2C, CH), 121.77 (C), 120.24 ( $\text{OCF}_3$ ), 119.43 (2C, CH), 117.85 (CH) ppm.  $^{19}\text{F}$  NMR (376 MHz,  $\text{DMSO-}d_6$ ):  $\delta = -56.93$  ppm. HRMS:  $m/z$  351.0593  $[\text{M} + \text{H}]^+$  calcd for  $\text{C}_{16}\text{H}_9\text{F}_3\text{N}_2\text{O}_4\text{H}$ , found:  $m/z$  351.0592.

(*E*)-3-(2-(4-((trifluoromethyl)thio)phenyl)hydrazono)chroman-2,4-dione (**4j**). Yellow amorphous solid; yield: 84% (922 mg; 3.0 mmol scale); mp = 201-202 °C.  $^1\text{H}$  NMR (400 MHz,  $\text{DMSO-}d_6$ ):  $\delta = 15.33$  (br s, 1H, -*NH*), 7.99 (d, 1H,  $J = 7.6$  Hz, Ar-H), 7.88-7.82 (m, 4H, Ar-H), 7.79-7.75 (m, 1H, Ar-H), 7.41-7.35 (m, 2H, Ar-H) ppm.  $^{13}\text{C}\{^1\text{H}\}$  NMR (100 MHz,  $\text{DMSO-}d_6$ ):  $\delta = 177.89$  (oxo CO), 158.03 (lactone CO), 154.10 (C), 143.66 (C), 137.82 (2C, CH), 136.70 (CH), 129.53 ( $\text{SCF}_3$ ,  $J_{\text{CF}}^1 = 306$  Hz), 126.56 (CH), 124.74 (CH), 123.87 (C), 120.77, 120.27 (C), 118.83 (2C, CH), 117.38 (CH) ppm.  $^{19}\text{F}$  NMR (376 MHz,  $\text{DMSO-}d_6$ ):  $\delta = -42.25$  ppm. HRMS:  $m/z$  367.0364  $[\text{M} + \text{H}]^+$  calcd for  $\text{C}_{16}\text{H}_9\text{F}_3\text{N}_2\text{O}_3\text{SH}$ , found:  $m/z$  367.0365.

(*E*)-3-(2-(3,5-bis(trifluoromethyl)phenyl)hydrazono)chroman-2,4-dione (**4k**). Bumble bee yellow amorphous solid; yield: 91% (1097 mg; 3.0 mmol scale); mp = 215-217 °C.  $^1\text{H}$  NMR (400 MHz,  $\text{DMSO-}d_6$ ):  $\delta = 15.09$  (br s, 1H, -*NH*), 8.39 (br s, 2H, Ar-H), 7.98-7.95 (m, 2H, Ar-H), 7.79-7.75 (m, 1H, Ar-H), 7.39-7.34 (m, 2H, Ar-H) ppm.  $^{13}\text{C}\{^1\text{H}\}$  NMR (100 MHz,  $\text{DMSO-}d_6$ ):  $\delta = 177.85$  (oxo CO), 157.87 (lactone CO), 154.17 (C), 143.44 (C), 136.92 (CH), 131.56 (2C,  $J_{\text{CF}}^2 = 33$  Hz), 126.59 (CH), 124.79 (CH), 123.03 ( $2 \times \text{CF}_3$ ,  $J_{\text{CF}}^1 = 271$  Hz), 120.24 (C), 119.42 (CH), 118.95 (C), 117.95 (CH), 117.44 (2C, CH) ppm.  $^{19}\text{F}$  NMR (376 MHz,  $\text{DMSO-}d_6$ ):  $\delta = -61.67$  ppm. HRMS:  $m/z$  403.0517  $[\text{M} + \text{H}]^+$  calcd for  $\text{C}_{17}\text{H}_8\text{F}_6\text{N}_2\text{O}_3\text{H}$ , found:  $m/z$  403.0518.

(*E*)-3-(2-(2,5-dichlorophenyl)hydrazineylidene)chromane-2,4-dione (**4l**). Medallion yellow amorphous solid; yield: 88% (884 mg; 3.0 mmol scale); mp = 246-248 °C.  $^1\text{H}$  NMR (400 MHz,  $\text{CDCl}_3$ ):  $\delta = 16.25$  (br s, 1H, -*NH*), 8.13-8.10 (m, 2H, Ar-H), 7.69 (t, 1H,  $J = 7.6$  Hz, Ar-H), 7.41-7.39 (m, 1H, Ar-H), 7.36-7.29 (m, 2H, Ar-H), 7.24-7.21 (m, 1H, Ar-H) ppm.  $^{13}\text{C}\{^1\text{H}\}$  NMR (100 MHz,  $\text{CDCl}_3$ ):  $\delta = 178.90$  (oxo CO), 158.56 (lactone CO), 154.69 (C), 138.54 (C), 137.08 (CH), 135.03 (C), 130.98 (CH), 128.43 (CH), 127.37 (CH), 125.08 (CH), 124.35 (C), 121.78 (C), 120.21 (C), 118.27 (CH), 117.90 (CH) ppm. HRMS:  $m/z$  334.9990  $[\text{M} + \text{H}]^+$  calcd for  $\text{C}_{15}\text{H}_8\text{Cl}_2\text{N}_2\text{O}_3\text{H}$ , found:  $m/z$  334.9991.

(*E*)-6-methyl-3-(2-(*p*-tolyl)hydrazono)chroman-2,4-dione (**4m**). Golden yellow amorphous solid; yield: 82% (723 mg; 3.0 mmol scale); mp = 226-228 °C.  $^1\text{H}$  NMR (400 MHz,  $\text{DMSO-}d_6$ ):  $\delta = 15.81$  (br s, 1H, -*NH*), 7.76 (m, 1H, Ar-H), 7.63 (d, 2H,  $J = 8.0$  Hz, Ar-H), 7.57 (d, 1H,  $J = 8.4$  Hz, Ar-H), 7.34 (d, 2H,  $J = 8.0$  Hz, Ar-H), 7.25 (d, 1H,  $J = 8.4$  Hz, Ar-H), 2.38 (s, 3H, Ar- $\text{CH}_3$ ), 2.34 (s, 3H, Ar- $\text{CH}_3$ ) ppm.  $^{13}\text{C}\{^1\text{H}\}$  NMR (100 MHz,  $\text{CDCl}_3$ ):  $\delta = 178.55$  (oxo CO), 159.62 (lactone CO), 152.67 (C), 139.19 (C), 138.42 (C), 137.23 (CH), 134.53 (C), 130.60 (2C, CH), 126.35 (CH), 122.06 (C), 120.05 (C), 118.20 (2C, CH), 117.49 (CH), 21.40 (Ar- $\text{CH}_3$ ), 20.85 (Ar- $\text{CH}_3$ ) ppm. HRMS:  $m/z$  317.0902  $[\text{M} + \text{Na}]^+$  calcd for  $\text{C}_{17}\text{H}_{14}\text{N}_2\text{O}_3\text{Na}$ , found:  $m/z$  317.0903.

(*E*)-3-(2-(4-methoxyphenyl)hydrazono)-6-methylchroman-2,4-dione (**4n**). Berry red amorphous solid; yield: 83% (772 mg; 3.0 mmol scale); mp = 218-224 °C.  $^1\text{H}$  NMR (400 MHz,  $\text{CDCl}_3$ ):  $\delta = 16.71$  (br s, 1H, -*NH*), 7.83 (br s, 1H, Ar-H), 7.63 (d, 2H,  $J = 8.0$  Hz, Ar-H), 7.44-7.42 (m, 1H, Ar-H), 7.16 (d, 1H,  $J = 8.4$  Hz, Ar-H), 6.98 (d, 2H,  $J = 9.2$  Hz, Ar-H), 3.85 (s, 3H, Ar- $\text{OCH}_3$ ), 2.41 (s, 3H, Ar- $\text{CH}_3$ ) ppm.  $^{13}\text{C}\{^1\text{H}\}$  NMR (100 MHz,  $\text{CDCl}_3$ ):  $\delta = 178.28$  (oxo CO), 160.27 (2C), 152.61 (C), 137.01 (CH), 134.46 (C), 134.21 (C), 126.23 (CH), 121.74 (C), 120.08 (C), 119.92 (2C, CH), 117.44 (CH), 115.30 (2C, CH), 55.81 (Ar- $\text{OCH}_3$ ), 20.85 (Ar- $\text{CH}_3$ ) ppm. HRMS:  $m/z$  311.1032  $[\text{M} + \text{H}]^+$  calcd for  $\text{C}_{17}\text{H}_{14}\text{N}_2\text{O}_4\text{H}$ , found:  $m/z$  311.1033.

(*E*)-6-methyl-3-(2-(4-((trifluoromethyl)thio)phenyl)hydrazono)chroman-2,4-dione (**4o**). Lemon yellow amorphous solid; yield: 81% (923 mg; 3.0 mmol scale); mp = 239-241 °C.  $^1\text{H}$  NMR (400 MHz,  $\text{CDCl}_3$ ):  $\delta = 16.17$

(br s, 1H, -NH), 7.84 (br s, 1H, Ar-H), 7.77-7.69 (m, 4H, Ar-H), 7.49 (d, 1H,  $J = 8.0$  Hz, Ar-H), 7.18 (d, 1H,  $J = 8.4$  Hz, Ar-H), 2.43 (s, 3H, Ar-CH<sub>3</sub>) ppm. <sup>13</sup>C{<sup>1</sup>H} NMR (100 MHz, CDCl<sub>3</sub>):  $\delta = 179.27$  (oxo CO), 158.87 (lactone CO), 152.87 (CH), 142.79 (C), 138.06 (CH), 138.01 (2C, CH), 134.93 (SCF<sub>3</sub>), 130.98 (C), 126.69 (CH), 123.73 (C), 123.52 (C), 119.86 (C), 118.71 (2C, CH), 117.69 (CH), 20.85 (Ar-CH<sub>3</sub>) ppm. <sup>19</sup>F NMR (376 MHz, CDCl<sub>3</sub>):  $\delta = -42.64$  ppm. HRMS:  $m/z$  381.0521[M + H]<sup>+</sup> calcd for C<sub>17</sub>H<sub>11</sub>F<sub>3</sub>N<sub>2</sub>O<sub>3</sub>SH, found:  $m/z$  381.0522.

(*E*)-6-methyl-3-(2-(4-(trifluoromethoxy)phenyl)hydrazono)chroman-2,4-dione (**4p**). Lemon yellow amorphous solid; yield: 80% (874 mg; 3.0mmol scale); mp = 265-266 °C. <sup>1</sup>H NMR (400 MHz, CDCl<sub>3</sub>):  $\delta = 16.34$  (br s, 1H, -NH), 7.85 (br s, 1H, Ar-H), 7.71 (d, 2H,  $J = 9.2$  Hz, Ar-H), 7.49-7.47 (m, 1H, Ar-H), 7.33 (d, 2H,  $J = 8.4$  Hz, Ar-H), 7.19 (d, 1H,  $J = 8.4$  Hz, Ar-H), 2.43 (s, 3H, Ar-CH<sub>3</sub>) ppm. <sup>13</sup>C{<sup>1</sup>H} NMR (100 MHz, CDCl<sub>3</sub>):  $\delta = 179.09$  (oxo CO), 159.18 (lactone CO), 152.84 (C), 148.62 (C), 139.21 (C), 137.82 (CH), 137.00 (C), 134.83 (C), 127.39 (OCF<sub>3</sub>), 126.58 (CH), 123.01 (C), 122.61 (2C, CH), 119.39 (2C, CH), 117.66 (CH), 20.86 (Ar-CH<sub>3</sub>) ppm. <sup>19</sup>F NMR (376 MHz, CDCl<sub>3</sub>):  $\delta = -57.97$  ppm. HRMS:  $m/z$  365.0749 [M + H]<sup>+</sup> calcd for C<sub>17</sub>H<sub>11</sub>F<sub>3</sub>N<sub>2</sub>O<sub>4</sub>H, found:  $m/z$  365.0748.

(*E*)-7-methyl-3-(2-(*p*-tolyl)hydrazono)chroman-2,4-dione (**4q**). Golden yellow amorphous solid; yield: 85% (750 mg; 3.0 mmol scale); mp = 234-238 °C. <sup>1</sup>H NMR (400 MHz, CDCl<sub>3</sub>):  $\delta = 16.46$  (br s, 1H, -NH), 7.94 (d, 1H,  $J = 8.0$  Hz, Ar-H), 7.55 (d, 1H,  $J = 8.4$  Hz, Ar-H), 7.26 (d, 1H,  $J = 8.4$  Hz, Ar-H), 7.11 (d, 1H,  $J = 8.0$  Hz, Ar-H), 7.06 (br s, 1H, Ar-H), 2.45 (s, 3H, Ar-CH<sub>3</sub>), 2.39 (s, 3H, Ar-CH<sub>3</sub>) ppm. <sup>13</sup>C{<sup>1</sup>H} NMR (100 MHz, CDCl<sub>3</sub>):  $\delta = 178.37$  (oxo CO), 159.60 (lactone CO), 154.61 (C), 148.13 (C), 139.04 (2C, C), 138.51 (C), 130.58 (2C, CH), 126.66 (CH), 125.99 (CH), 121.99 (C), 118.13 (2C, CH), 117.74 (CH), 22.19 (Ar-CH<sub>3</sub>), 21.38 (Ar-CH<sub>3</sub>) ppm. HRMS:  $m/z$  295.1083[M + H]<sup>+</sup> calcd for C<sub>17</sub>H<sub>14</sub>N<sub>2</sub>O<sub>3</sub>H, found:  $m/z$  295.1082.

(*E*)-7-methoxy-3-(2-(4-methoxyphenyl)hydrazono)chroman-2,4-dione (**4r**). Blush red amorphous solid; yield: 86% (841 mg; 3.0 mmol scale); mp = 230-231 °C. <sup>1</sup>H NMR (400 MHz, CDCl<sub>3</sub>):  $\delta = 16.63$  (br s, 1H, -NH), 7.96 (d, 1H,  $J = 8.8$  Hz, Ar-H), 7.59 (d, 2H,  $J = 9.2$  Hz, Ar-H), 6.97 (d, 2H,  $J = 9.2$  Hz, Ar-H), 6.84 (dd, 1H,  $J = 8.8$  and 2.4 Hz, Ar-H), 6.71 (d, 1H,  $J = 2.4$  Hz, Ar-H), 3.89 (s, 3H, Ar-OCH<sub>3</sub>), 3.85 (s, 3H, Ar-OCH<sub>3</sub>) ppm. <sup>13</sup>C{<sup>1</sup>H} NMR (100 MHz, CDCl<sub>3</sub>):  $\delta = 177.63$  (oxo CO), 166.16 (lactone CO), 160.01 (C), 159.78 (C), 156.43 (C), 134.34 (C), 128.25 (CH), 121.26 (C), 119.66 (2C, CH), 115.25 (2C, CH), 113.86 (C), 112.96 (CH), 101.05 (CH), 56.09 (Ar-OCH<sub>3</sub>), 55.80 (Ar-OCH<sub>3</sub>) ppm. HRMS:  $m/z$  327.0981 [M + H]<sup>+</sup> calcd for C<sub>17</sub>H<sub>14</sub>N<sub>2</sub>O<sub>5</sub>H, found:  $m/z$  327.0982.

(*E*)-6-chloro-3-(2-(*p*-tolyl)hydrazono)chroman-2,4-dione (**4s**). Fire yellow amorphous solid; yield: 82% (775 mg; 3.0 mmol scale); mp = 242-243 °C. <sup>1</sup>H NMR (400 MHz, CDCl<sub>3</sub>):  $\delta = 16.47$  (br s, 1H, -NH), 8.02 (d, 1H,  $J = 2.8$  Hz, Ar-H), 7.59-7.57 (m, 3H, Ar-H), 7.29 (d, 2H,  $J = 8.0$  Hz, Ar-H), 7.24 (d, 1H,  $J = 8.4$  Hz, Ar-H), 2.41 (s, 3H, Ar-CH<sub>3</sub>) ppm. <sup>13</sup>C{<sup>1</sup>H} NMR (100 MHz, CDCl<sub>3</sub>):  $\delta = 177.13$  (oxo CO), 158.93 (lactone CO), 152.92 (C), 139.82 (C), 139.35 (C), 138.25 (C), 135.98 (CH), 130.71 (2C, CH), 127.04 (C), 126.19 (CH), 121.49 (C), 119.37 (CH), 118.46 (2C, CH), 21.45 (Ar-CH<sub>3</sub>) ppm. HRMS:  $m/z$  315.0536 [M + H]<sup>+</sup> calcd for C<sub>16</sub>H<sub>11</sub>ClN<sub>2</sub>O<sub>3</sub>, found:  $m/z$  315.0537.

(*E*)-6-chloro-3-(2-(4-methoxyphenyl)hydrazono)chroman-2,4-dione (**4t**). Medallion yellow amorphous solid; yield: 78% (775 mg; 3.0 mmol scale); mp = 241-242 °C. <sup>1</sup>H NMR (400 MHz, CDCl<sub>3</sub>):  $\delta = 16.71$  (br s, 1H, -NH), 8.02 (d, 1H,  $J = 2.4$  Hz, Ar-H), 7.66 (d, 2H,  $J = 9.2$  Hz, Ar-H), 7.59-7.56 (m, 1H, Ar-H), 7.24 (d, 1H,  $J = 9.2$  Hz, Ar-H), 7.00 (d, 2H,  $J = 8.8$  Hz, Ar-H), 3.87 (s, 3H, Ar-OCH<sub>3</sub>) ppm. <sup>13</sup>C{<sup>1</sup>H} NMR (100 MHz, CDCl<sub>3</sub>):  $\delta = 176.83$  (oxo CO), 160.69 (C), 159.17 (lactone CO), 152.84 (C), 135.77 (CH), 134.00 (C), 130.36 (C), 126.08 (CH), 121.52 (C), 121.31 (C), 120.23 (2C, CH), 119.32 (CH), 115.42 (2C, CH), 55.87 (Ar-OCH<sub>3</sub>) ppm. HRMS:  $m/z$  331.0486 [M + H]<sup>+</sup> calcd for C<sub>16</sub>H<sub>11</sub>ClN<sub>2</sub>O<sub>4</sub>, found:  $m/z$  331.0487.

(*E*)-3-(2-(3,5-bis(trifluoromethyl)phenyl)hydrazono)-6-chlorochroman-2,4-dione (**4u**). Pineapple yellow amorphous solid; yield: 81% (1062 mg; 3.0mmol scale); mp = 201-203 °C. <sup>1</sup>H NMR (400 MHz, CDCl<sub>3</sub>): δ = 16.14 (br s, 1H, -NH), 8.09 (br s, 2H, Ar-H), 8.04 (d, 1H, *J* = 2.8 Hz, Ar-H), 7.83 (br s, 1H, Ar-H), 7.67-7.64 (m, 1H, Ar-H), 7.28 (d, 1H, *J* = 8.0 Hz, Ar-H) ppm. <sup>13</sup>C{<sup>1</sup>H} NMR (100 MHz, CDCl<sub>3</sub>): δ = 178.33 (oxo CO), 157.68 (lactone CO), 153.17 (C), 141.97 (C), 137.28 (CH), 134.83 (2C, *J*<sub>CF</sub><sup>2</sup> = 35 Hz), 130.98 (C), 126.65 (CH), 123.67 (C), 122.72 (2 × CF<sub>3</sub>, *J*<sub>CF</sub><sup>1</sup> = 277 Hz), 121.28 (CH, *J*<sub>CF</sub><sup>3</sup> = 3 Hz), 120.98 (C), 119.68 (2C, CH), 117.90 (CH) ppm. HRMS: *m/z* 437.0128 [M + H]<sup>+</sup> calcd for C<sub>17</sub>H<sub>7</sub>ClF<sub>6</sub>N<sub>2</sub>O<sub>3</sub>H, found: *m/z* 437.0127.

5 Scanned copies of  $^1\text{H}$  NMR,  $^{13}\text{C}$  NMR, DEPT-135,  $^{19}\text{F}$  NMR and HRMS spectra for all compounds of functionalized (*E*)-3-(2-arylhrazono)chroman-2,4-dione 4 (4a – 4u) (Figure S1 – S85)

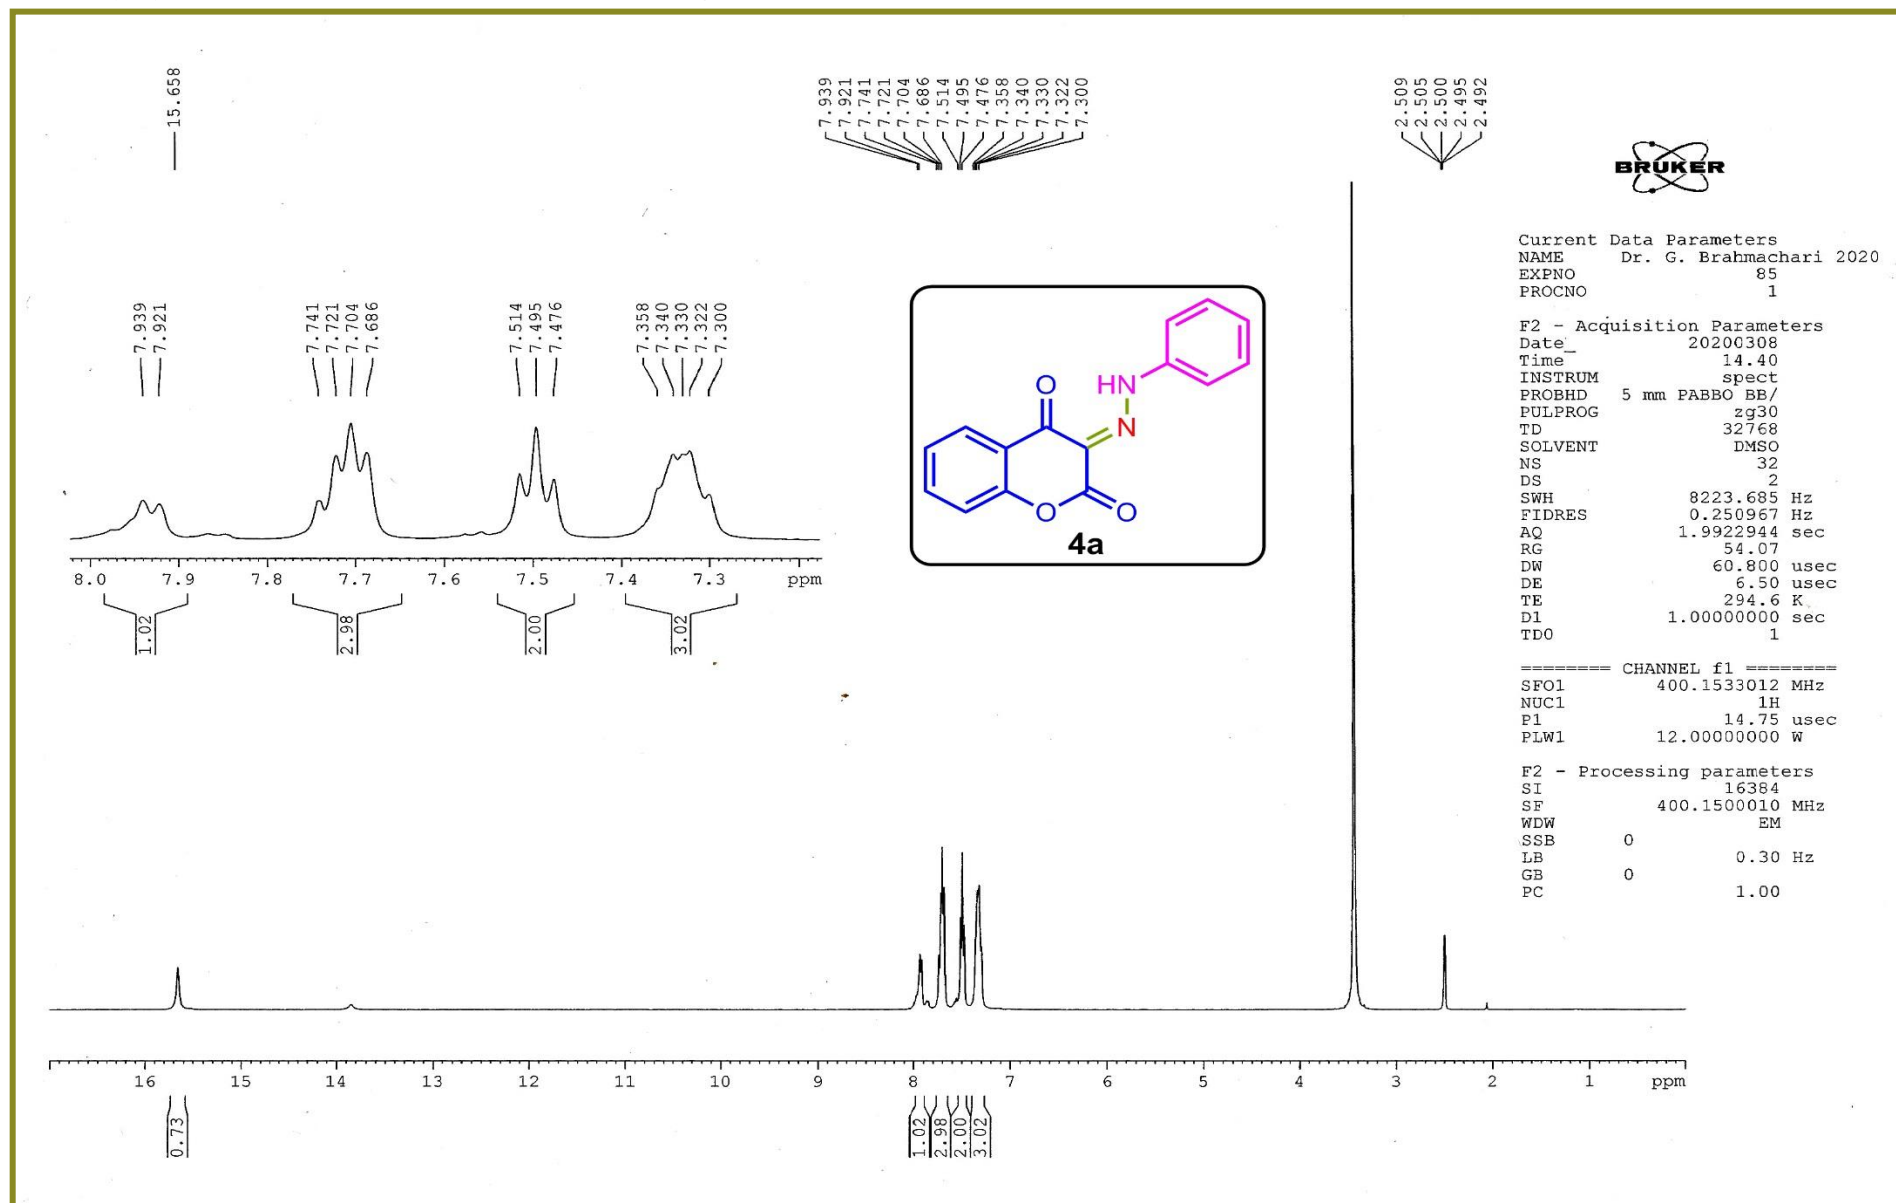

Figure S1.  $^1\text{H}$ -NMR spectrum of (*E*)-3-(2-phenylhydrazono)chroman-2,4-dione (4a)

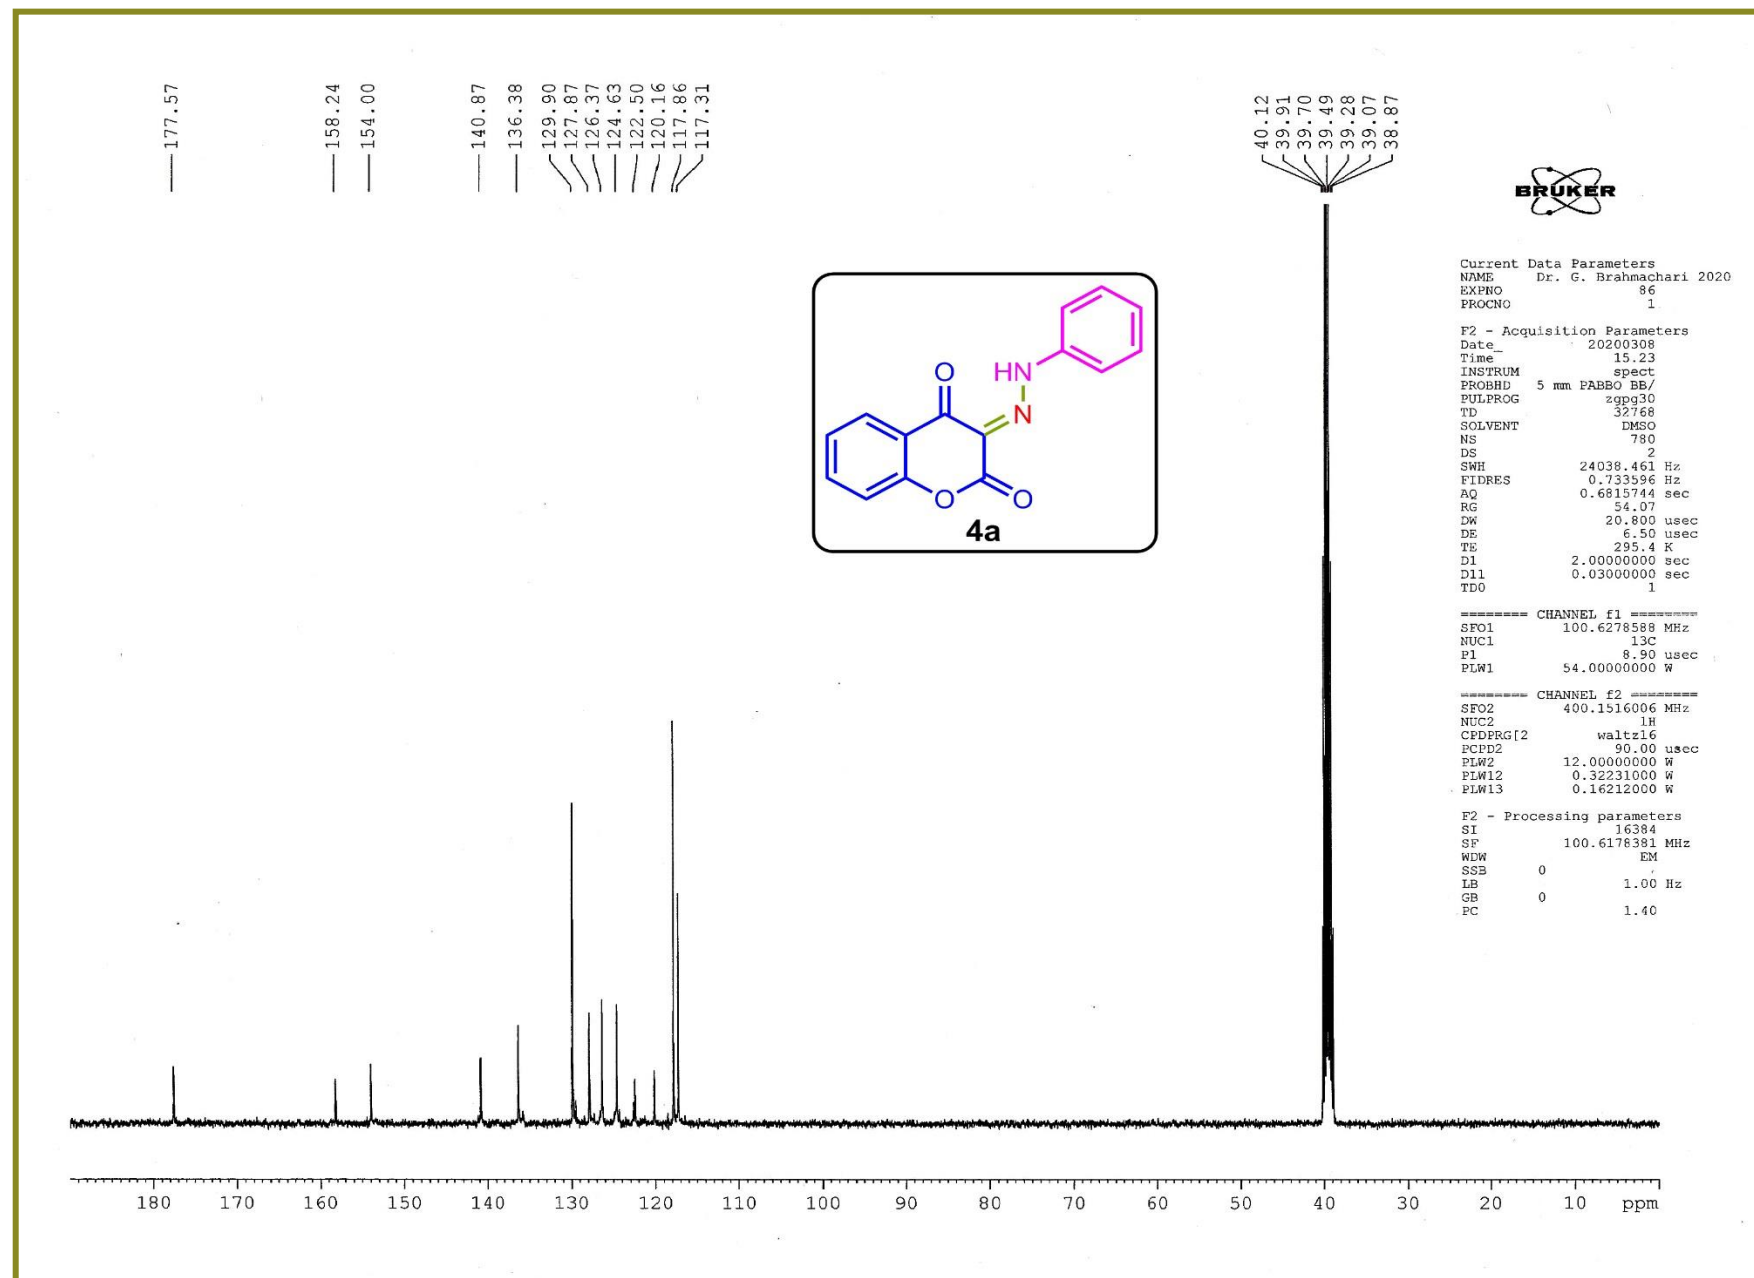

Figure S2. <sup>13</sup>C-NMR spectrum of (*E*)-3-(2-phenylhydrazono)chroman-2,4-dione (**4a**)



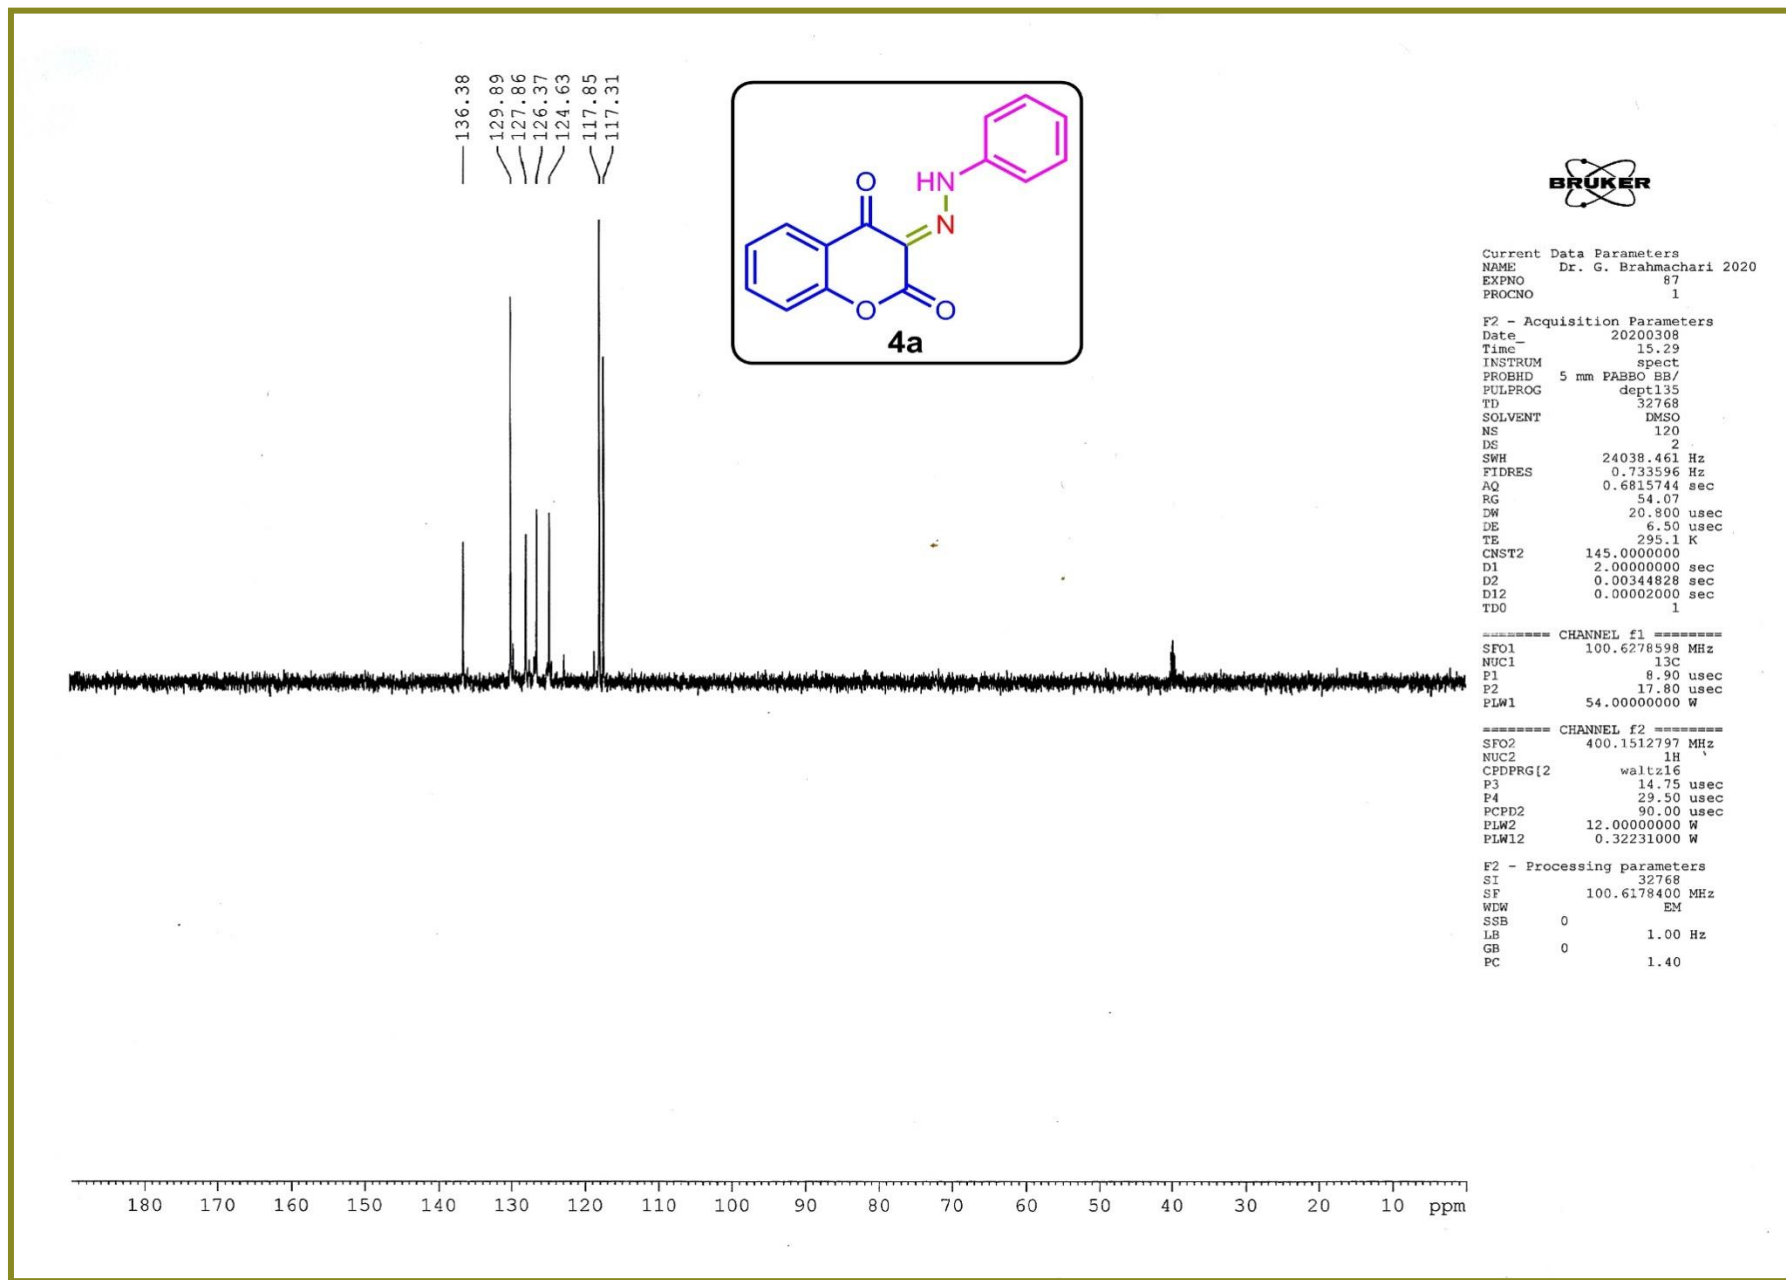

Figure S3. DEPT-135 NMR spectrum of (*E*)-3-(2-phenylhydrazono)chroman-2,4-dione (**4a**)

## Display Report

### Analysis Info

Analysis Name D:\Data\User data\2020\OCT\GB-81.d  
Method Tune\_pos\_Standard.m  
Sample Name GB-81  
Comment

Acquisition Date 10/13/2020 2:19:34 PM  
Operator IISER Kolkata  
Instrument maXis impact 8282001.00127

### Acquisition Parameter

|             |          |                      |          |                  |           |
|-------------|----------|----------------------|----------|------------------|-----------|
| Source Type | ESI      | Ion Polarity         | Positive | Set Nebulizer    | 0.5 Bar   |
| Focus       | Active   | Set Capillary        | 3400 V   | Set Dry Heater   | 200 °C    |
| Scan Begin  | 50 m/z   | Set End Plate Offset | -500 V   | Set Dry Gas      | 4.0 l/min |
| Scan End    | 1000 m/z | Set Charging Voltage | 2000 V   | Set Divert Valve | Source    |
|             |          | Set Corona           | 0 nA     | Set APCI Heater  | 0 °C      |

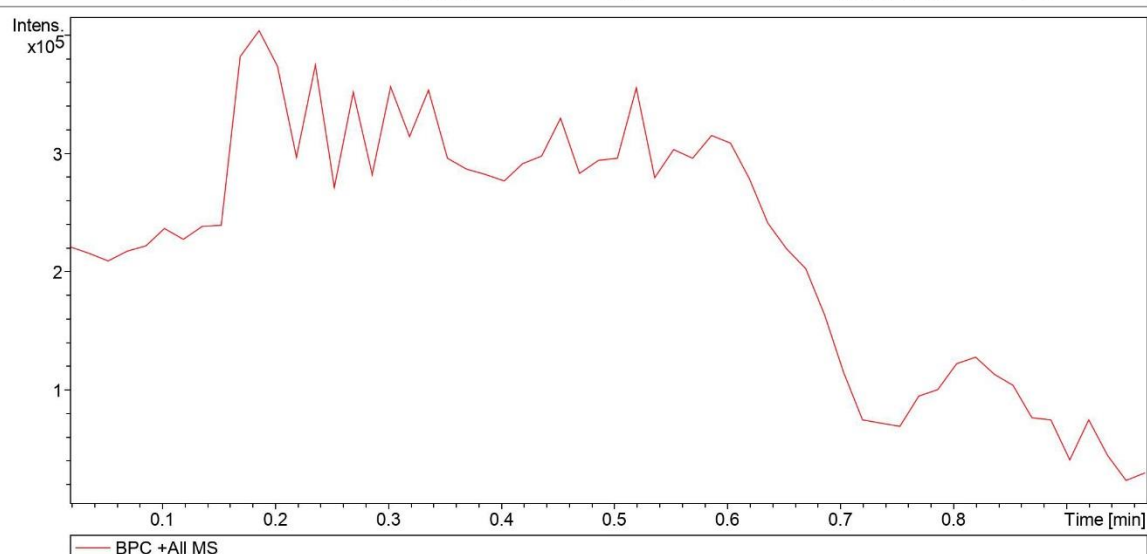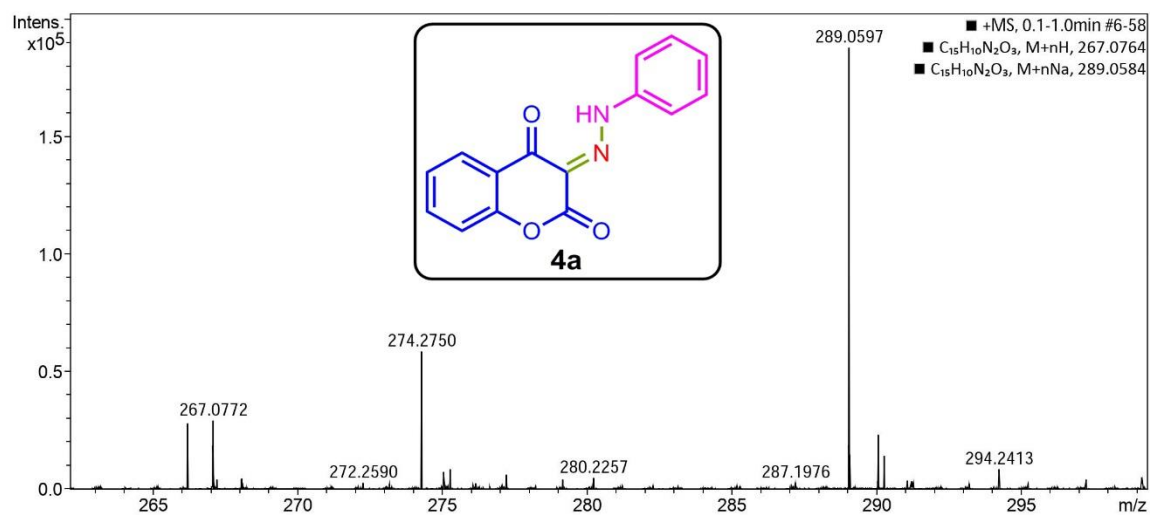

GB-81.d

Bruker Compass DataAnalysis 4.1

printed: 10/13/2020 2:25:05 PM

by: IISER Kolkata

Page 1 of 1

Figure S4. Mass spectra of (*E*)-3-(2-phenylhydrazono)chroman-2,4-dione (**4a**)

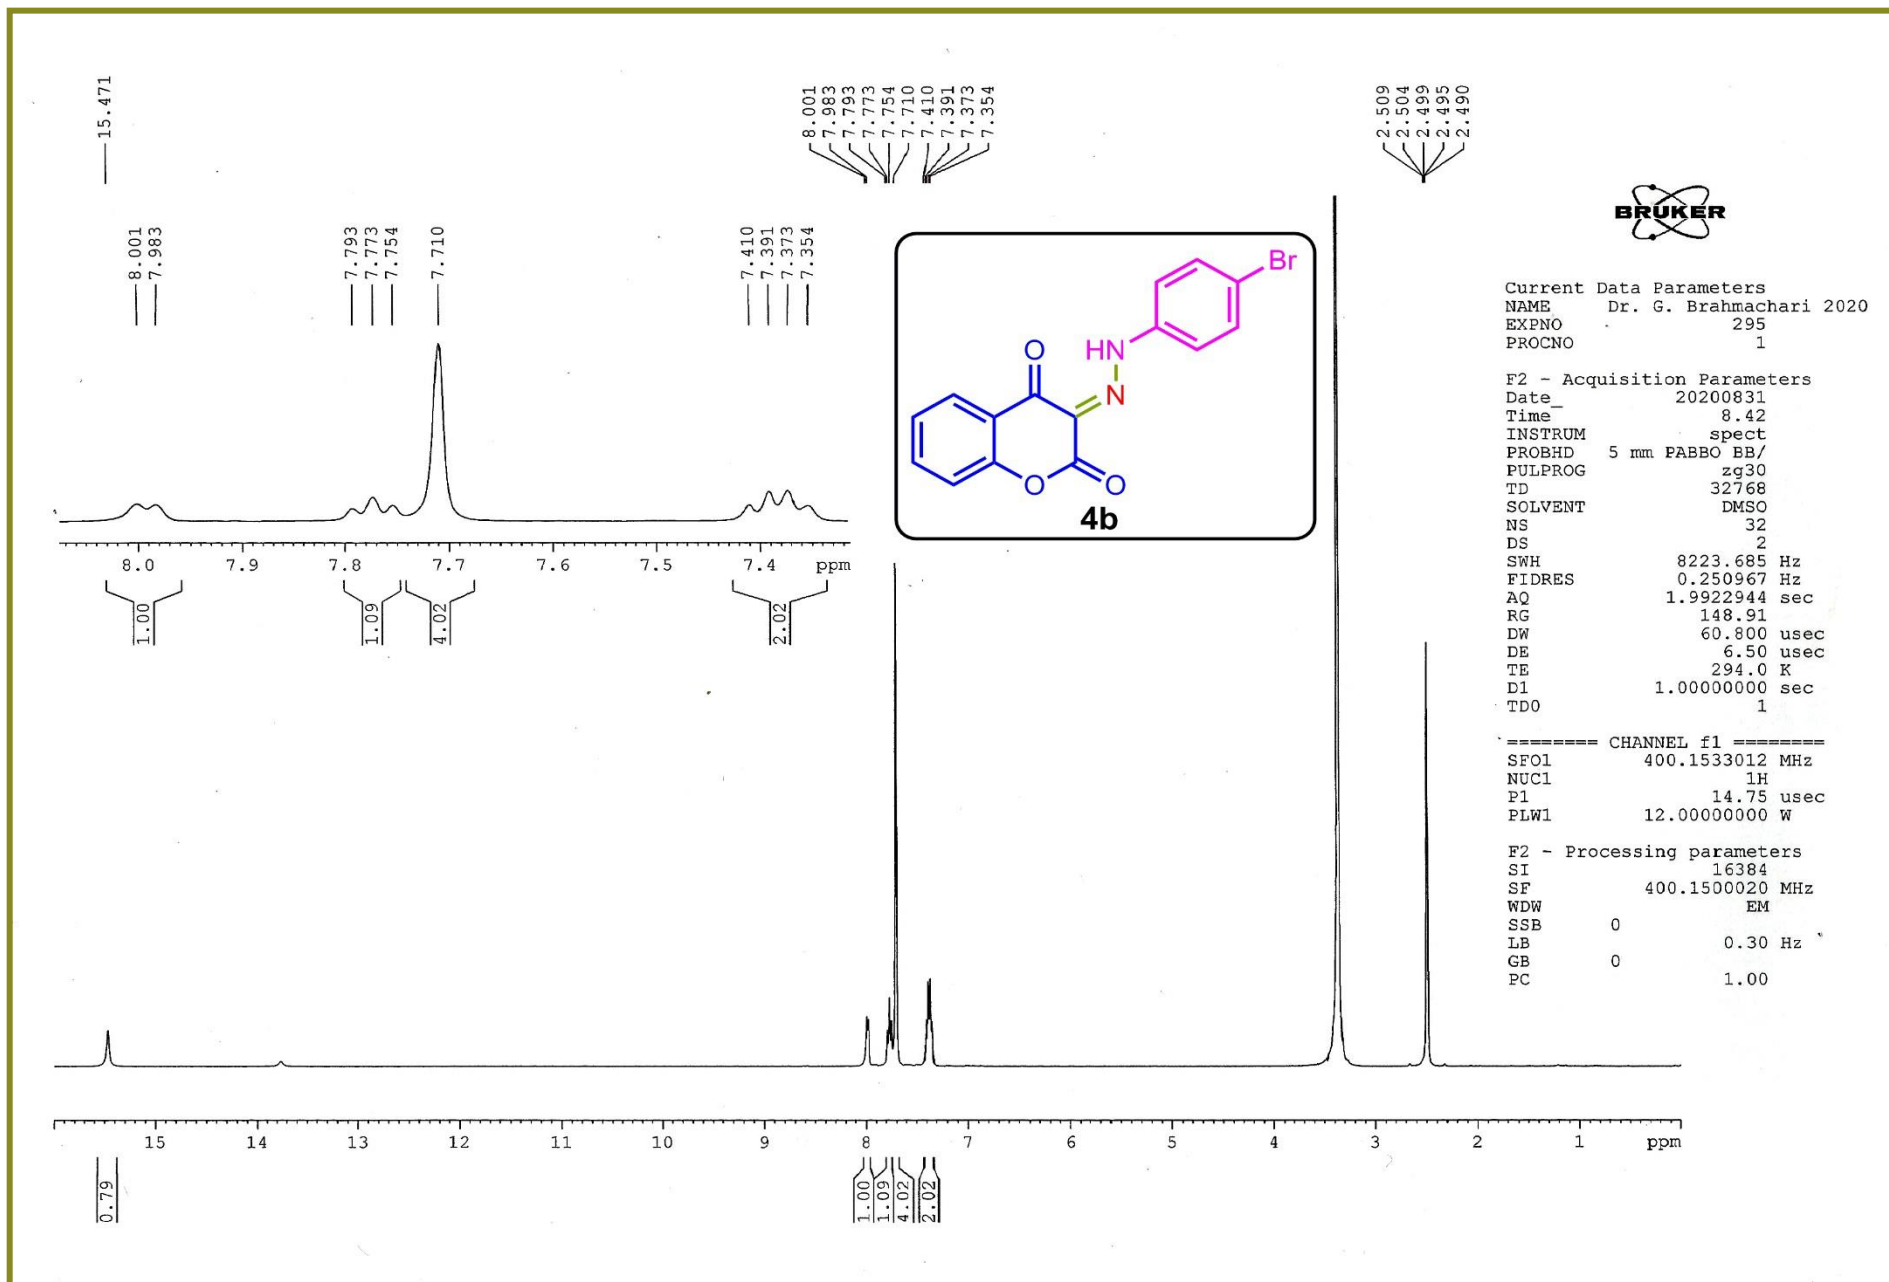

Figure S5. <sup>1</sup>H-NMR spectrum of (*E*)-3-(2-(4-bromophenyl)hydrazono)chroman-2,4-dione (**4b**)

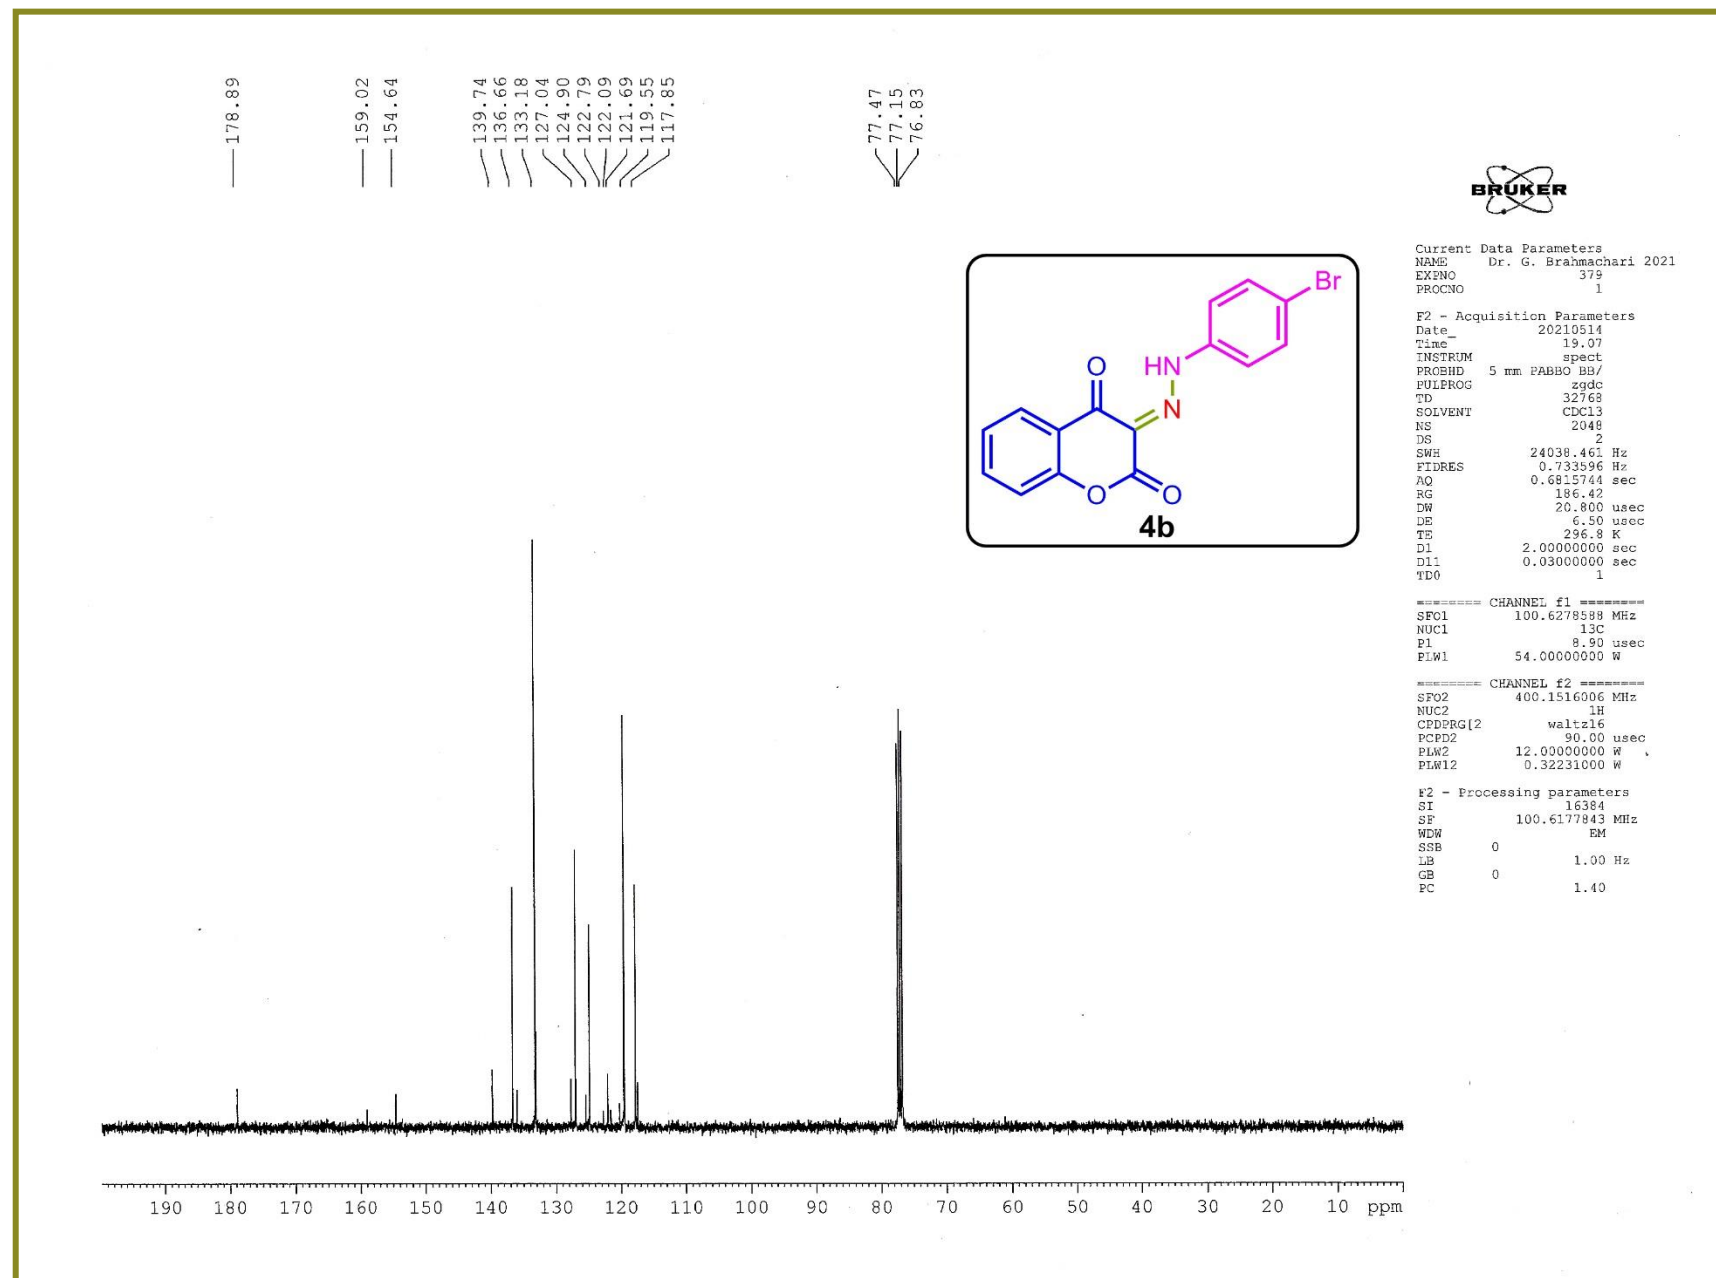

Figure S6. <sup>13</sup>C-NMR spectrum of (*E*)-3-(2-(4-bromophenyl)hydrazono)chroman-2,4-dione (**4b**)

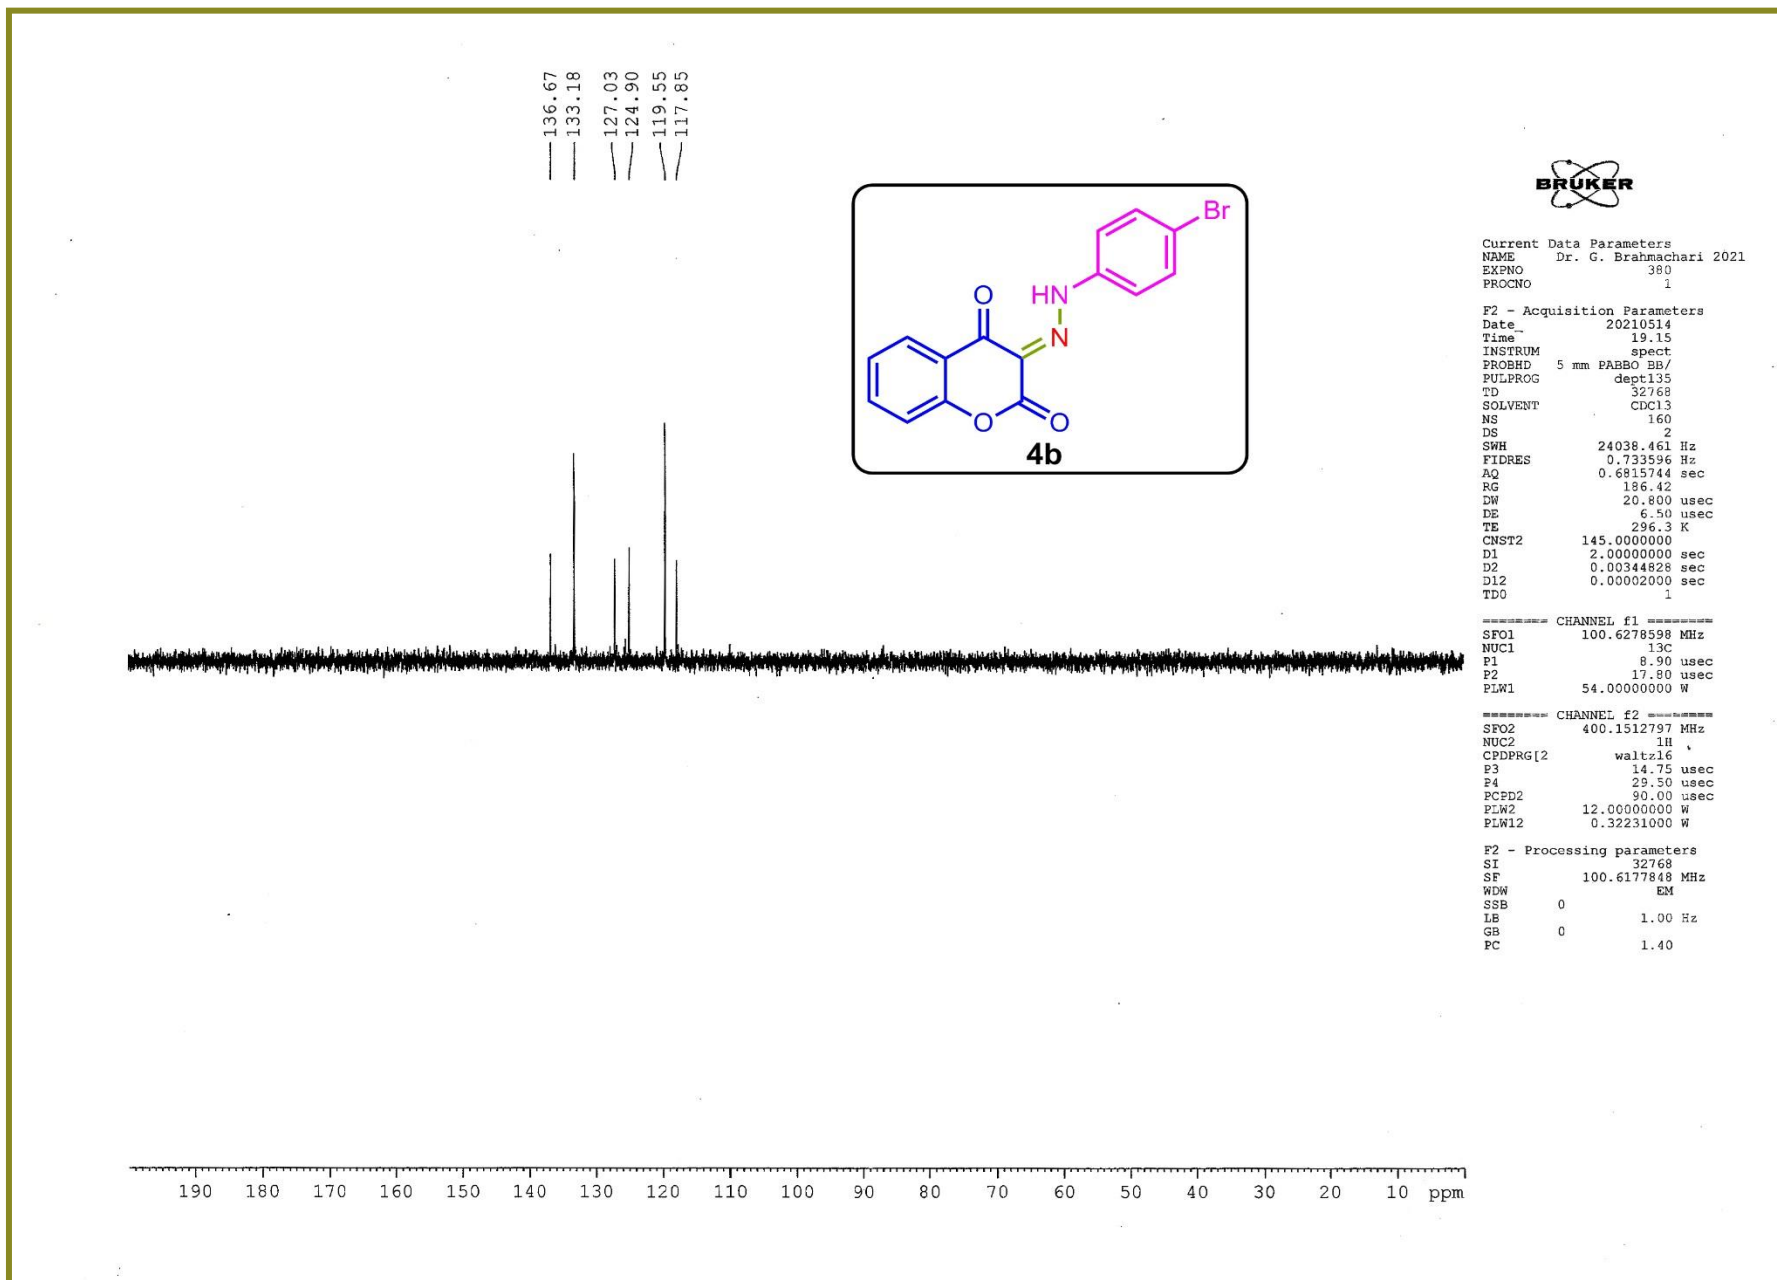

Figure S7. DEPT-135 NMR spectrum of (*E*)-3-(2-(4-bromophenyl)hydrazono)chroman-2,4-dione (**4b**)

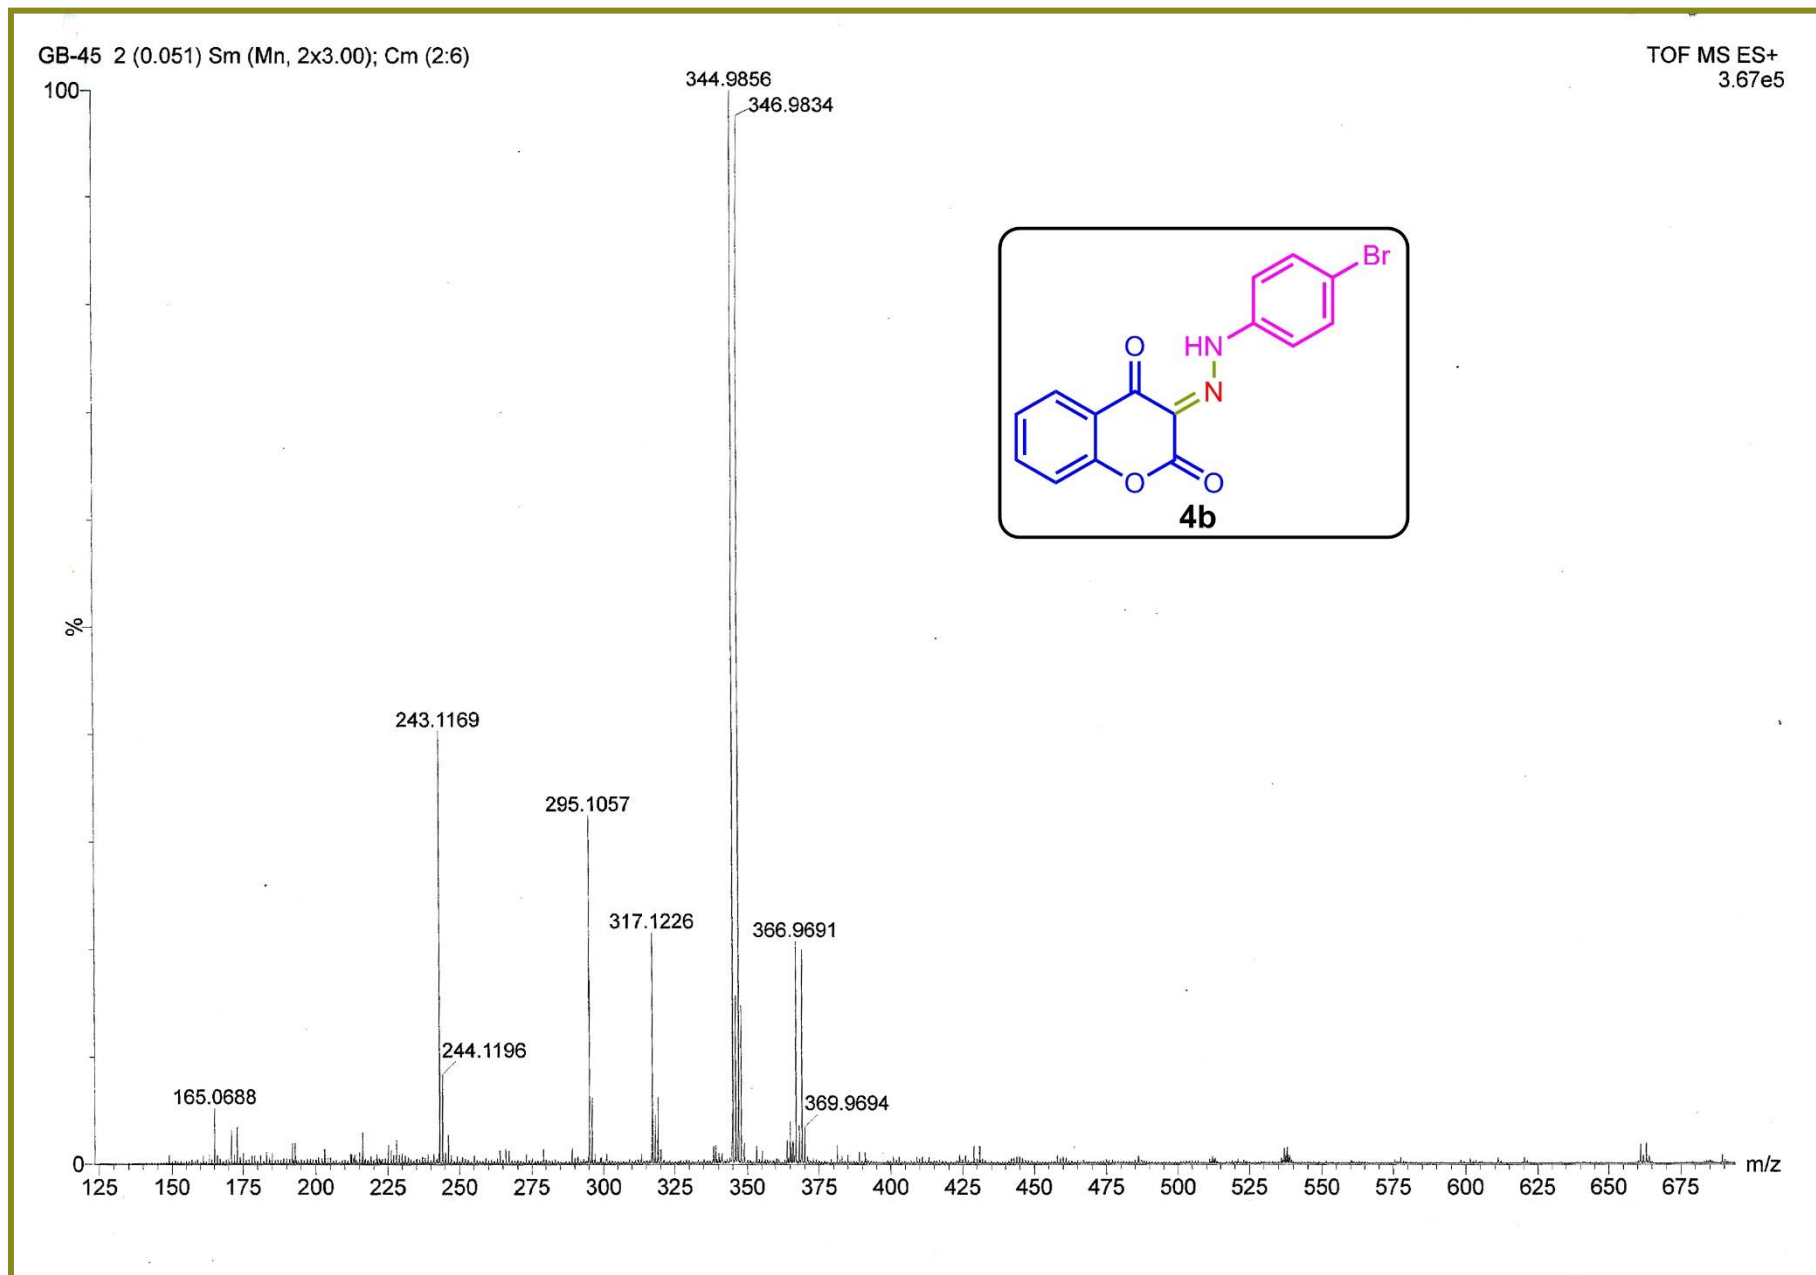

Figure S8. Mass spectra of (*E*)-3-(2-(4-bromophenyl)hydrazono)chroman-2,4-dione (**4b**)

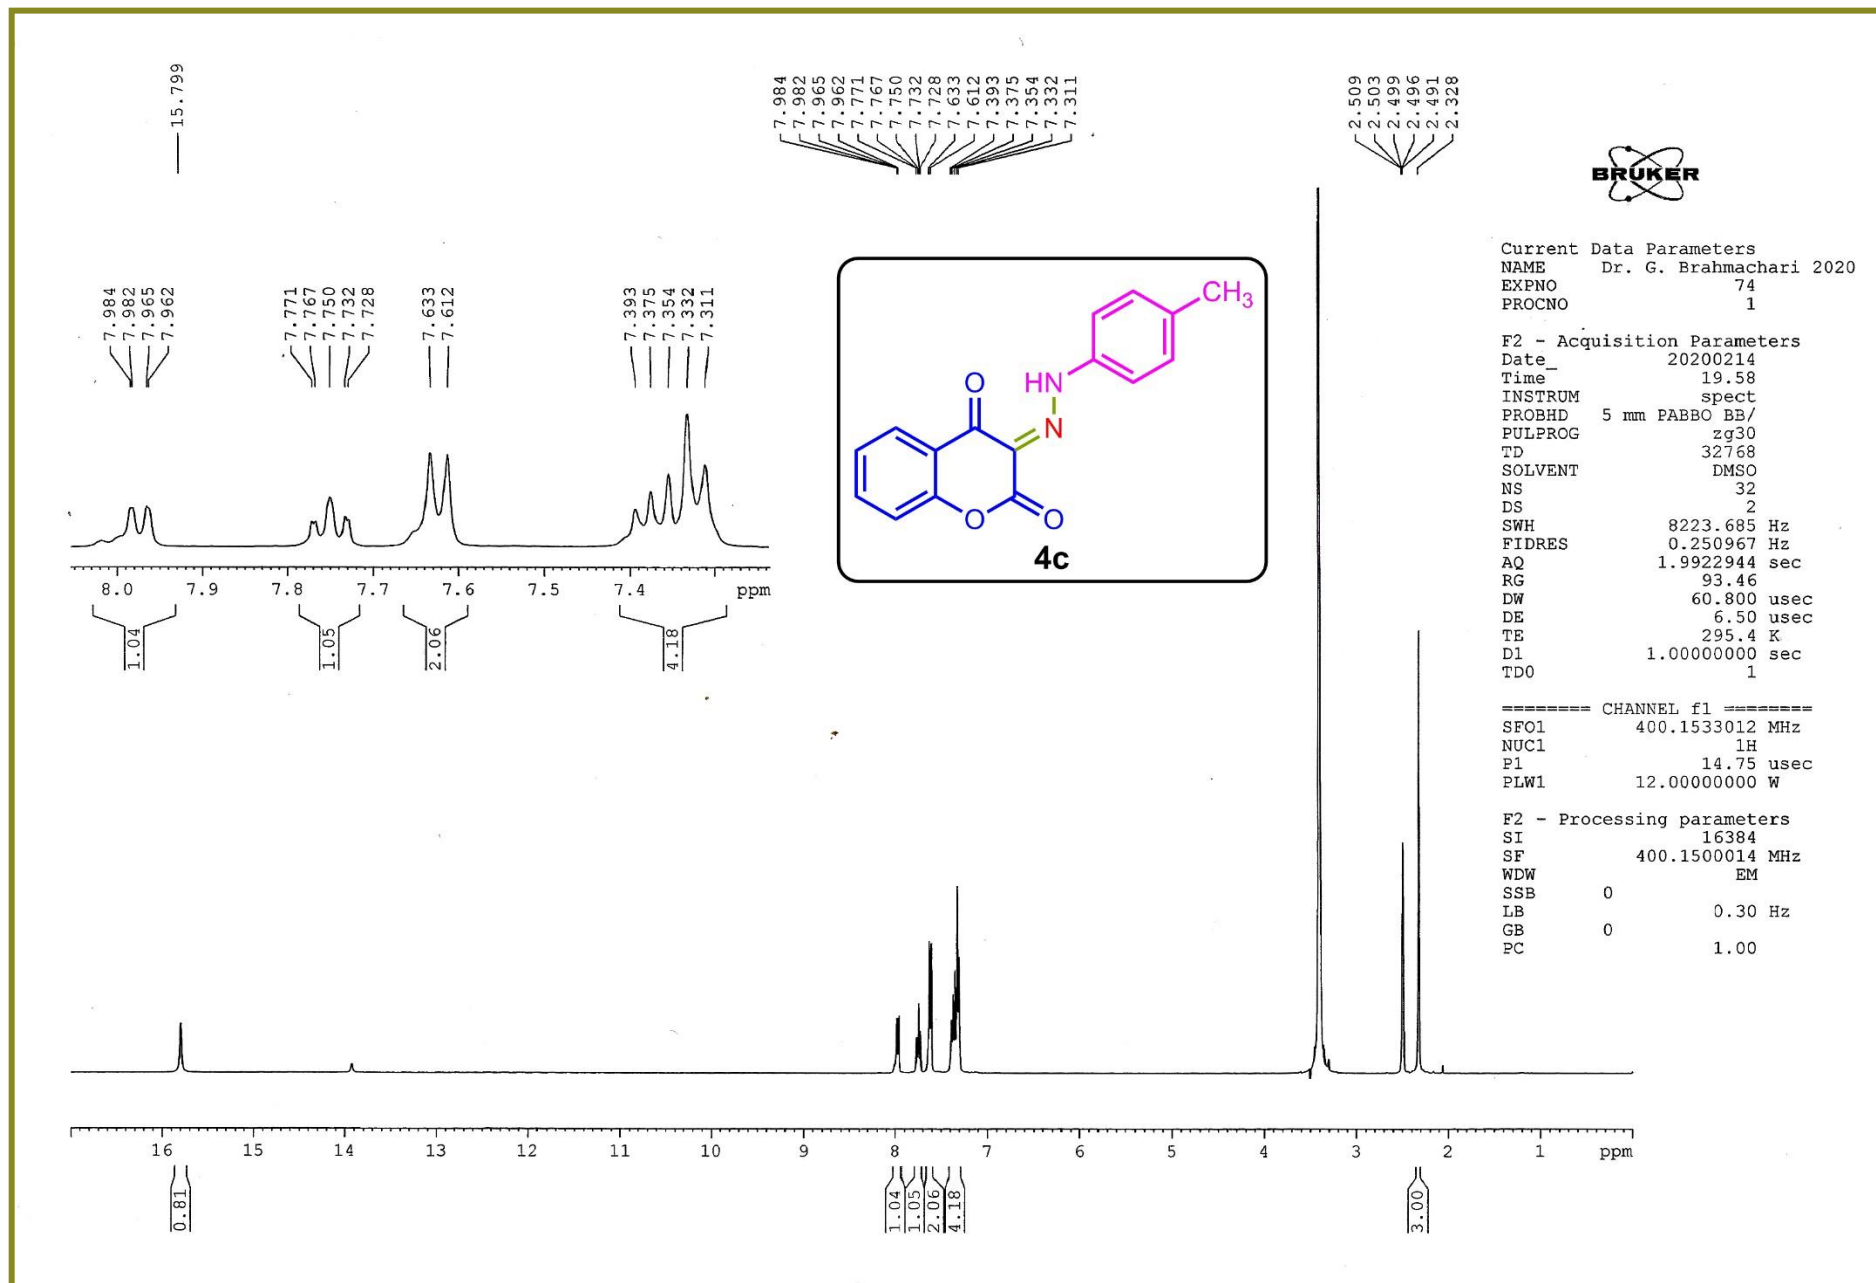

Figure S9. <sup>1</sup>H-NMR spectrum of (*E*)-3-(2-(*p*-tolyl)hydrazono)chroman-2,4-dione (**4c**)

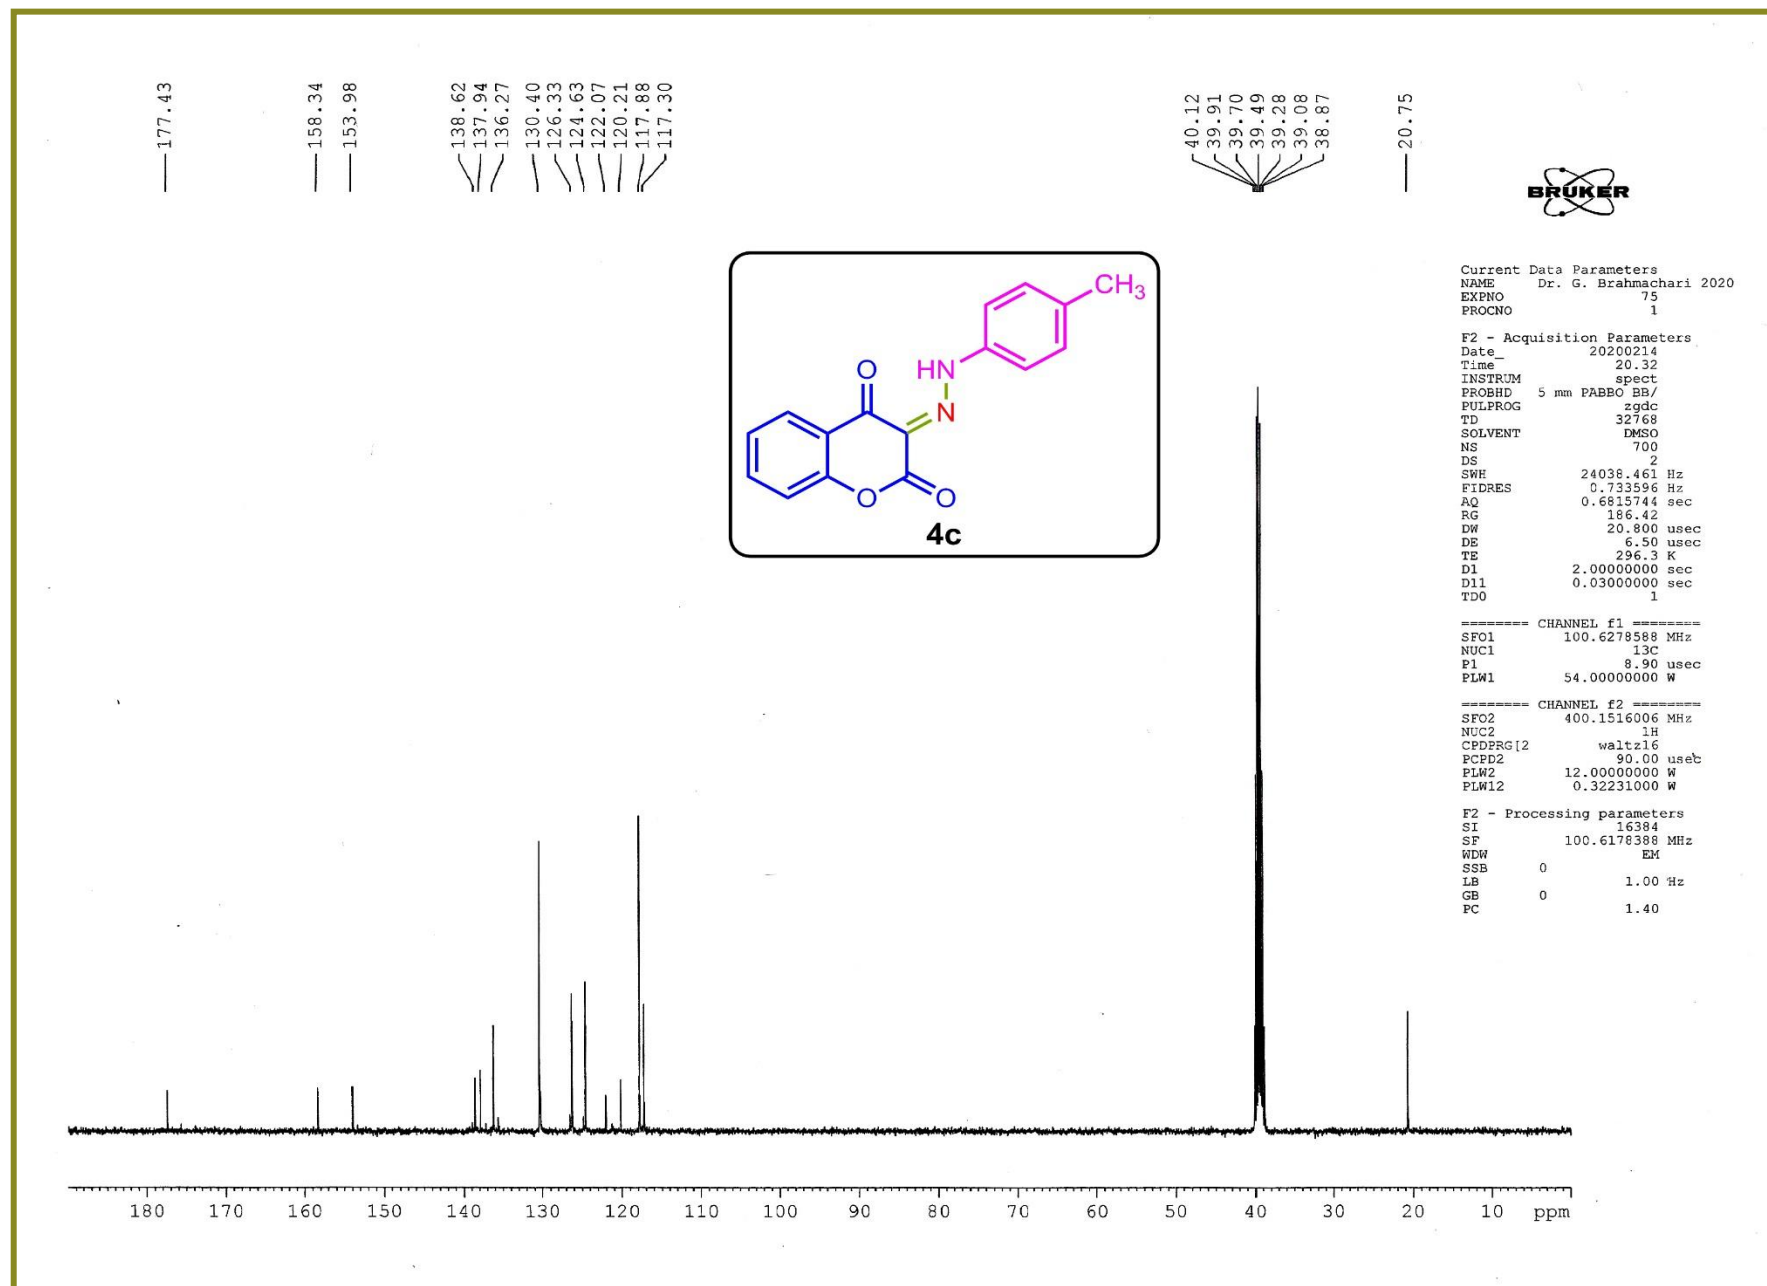

Figure S10. <sup>13</sup>C-NMR spectrum of (*E*)-3-(2-(*p*-tolyl)hydrazono)chroman-2,4-dione (**4c**)



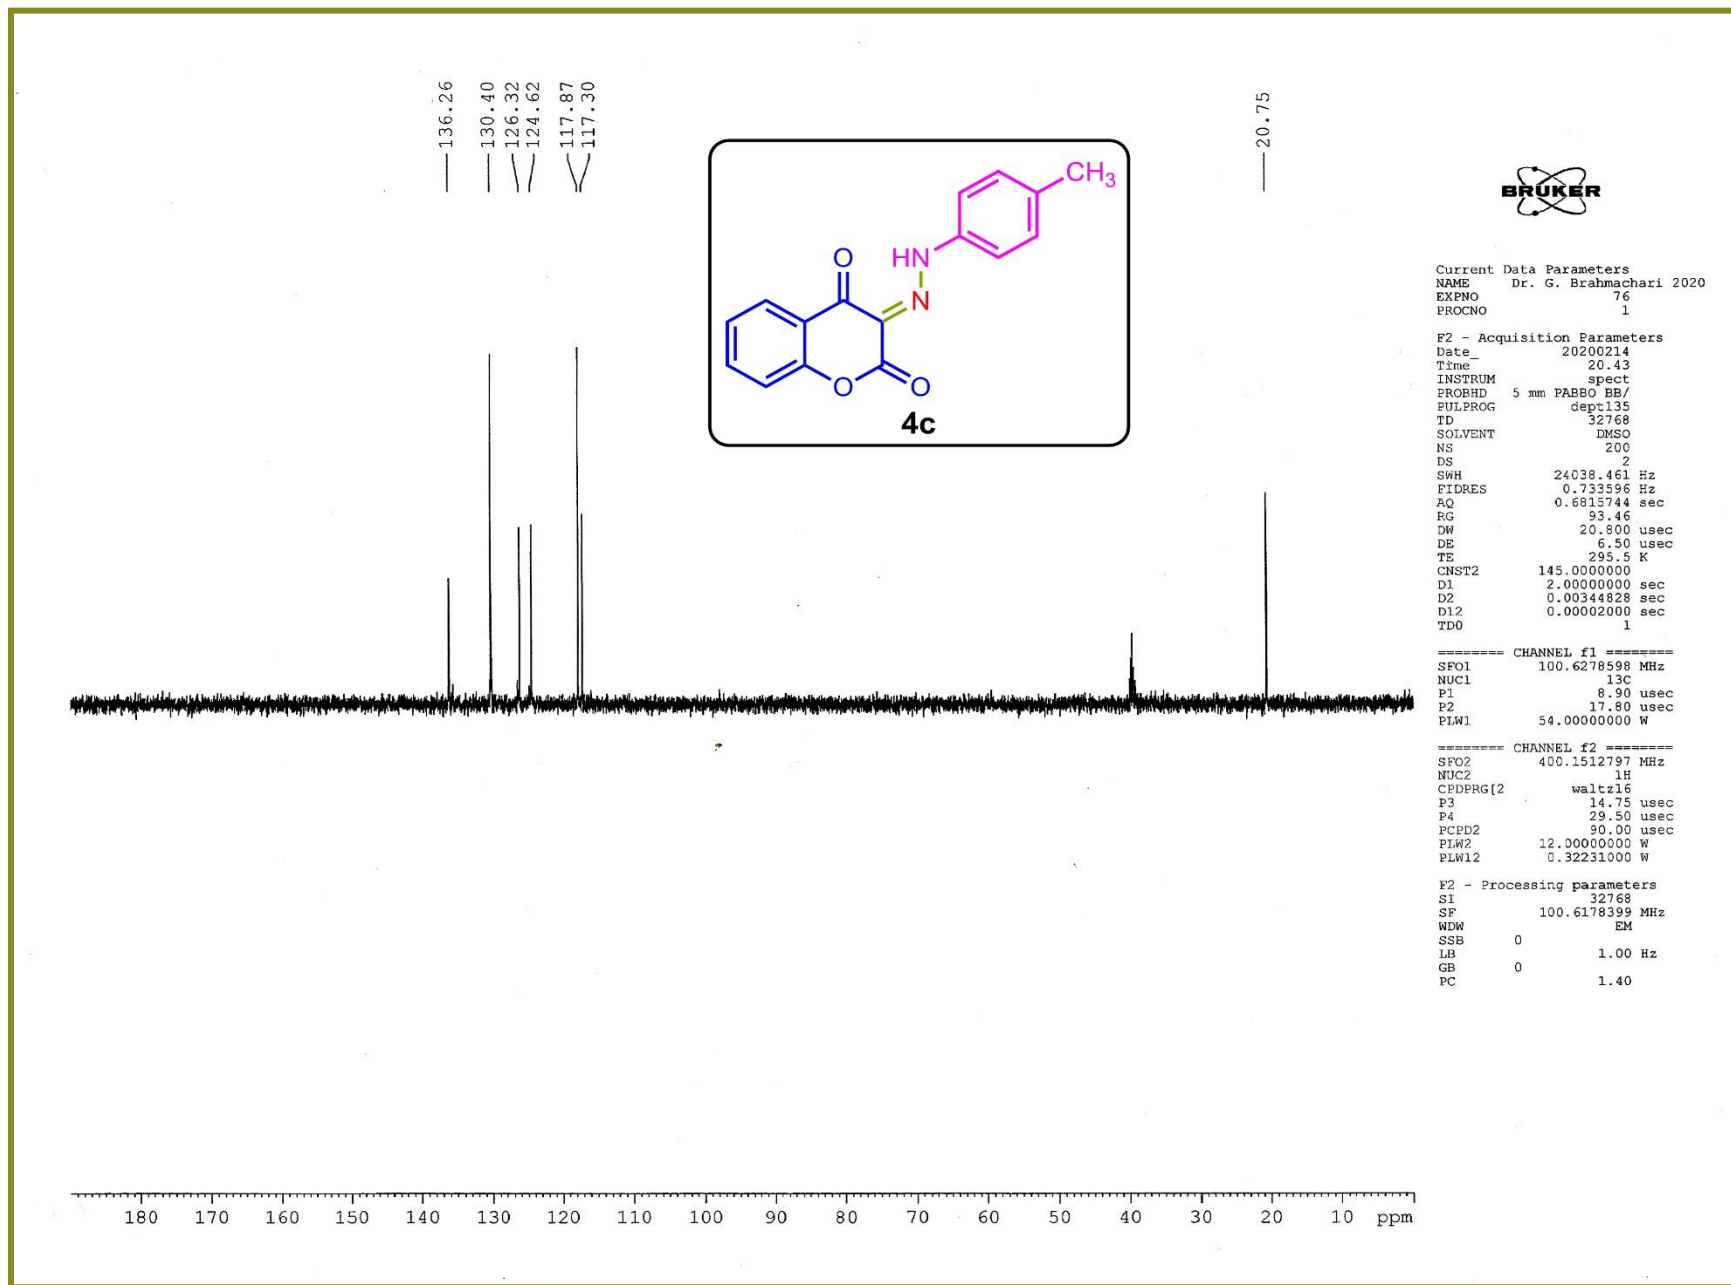

Figure S11. DEPT-135 NMR spectrum of (*E*)-3-(2-(*p*-tolyl)hydrazono)chroman-2,4-dione (**4c**)

GB-60 7 (0.135) Sm (Mn, 2x3.00); Cm (3:7)

TOF MS ES+  
1.21e6

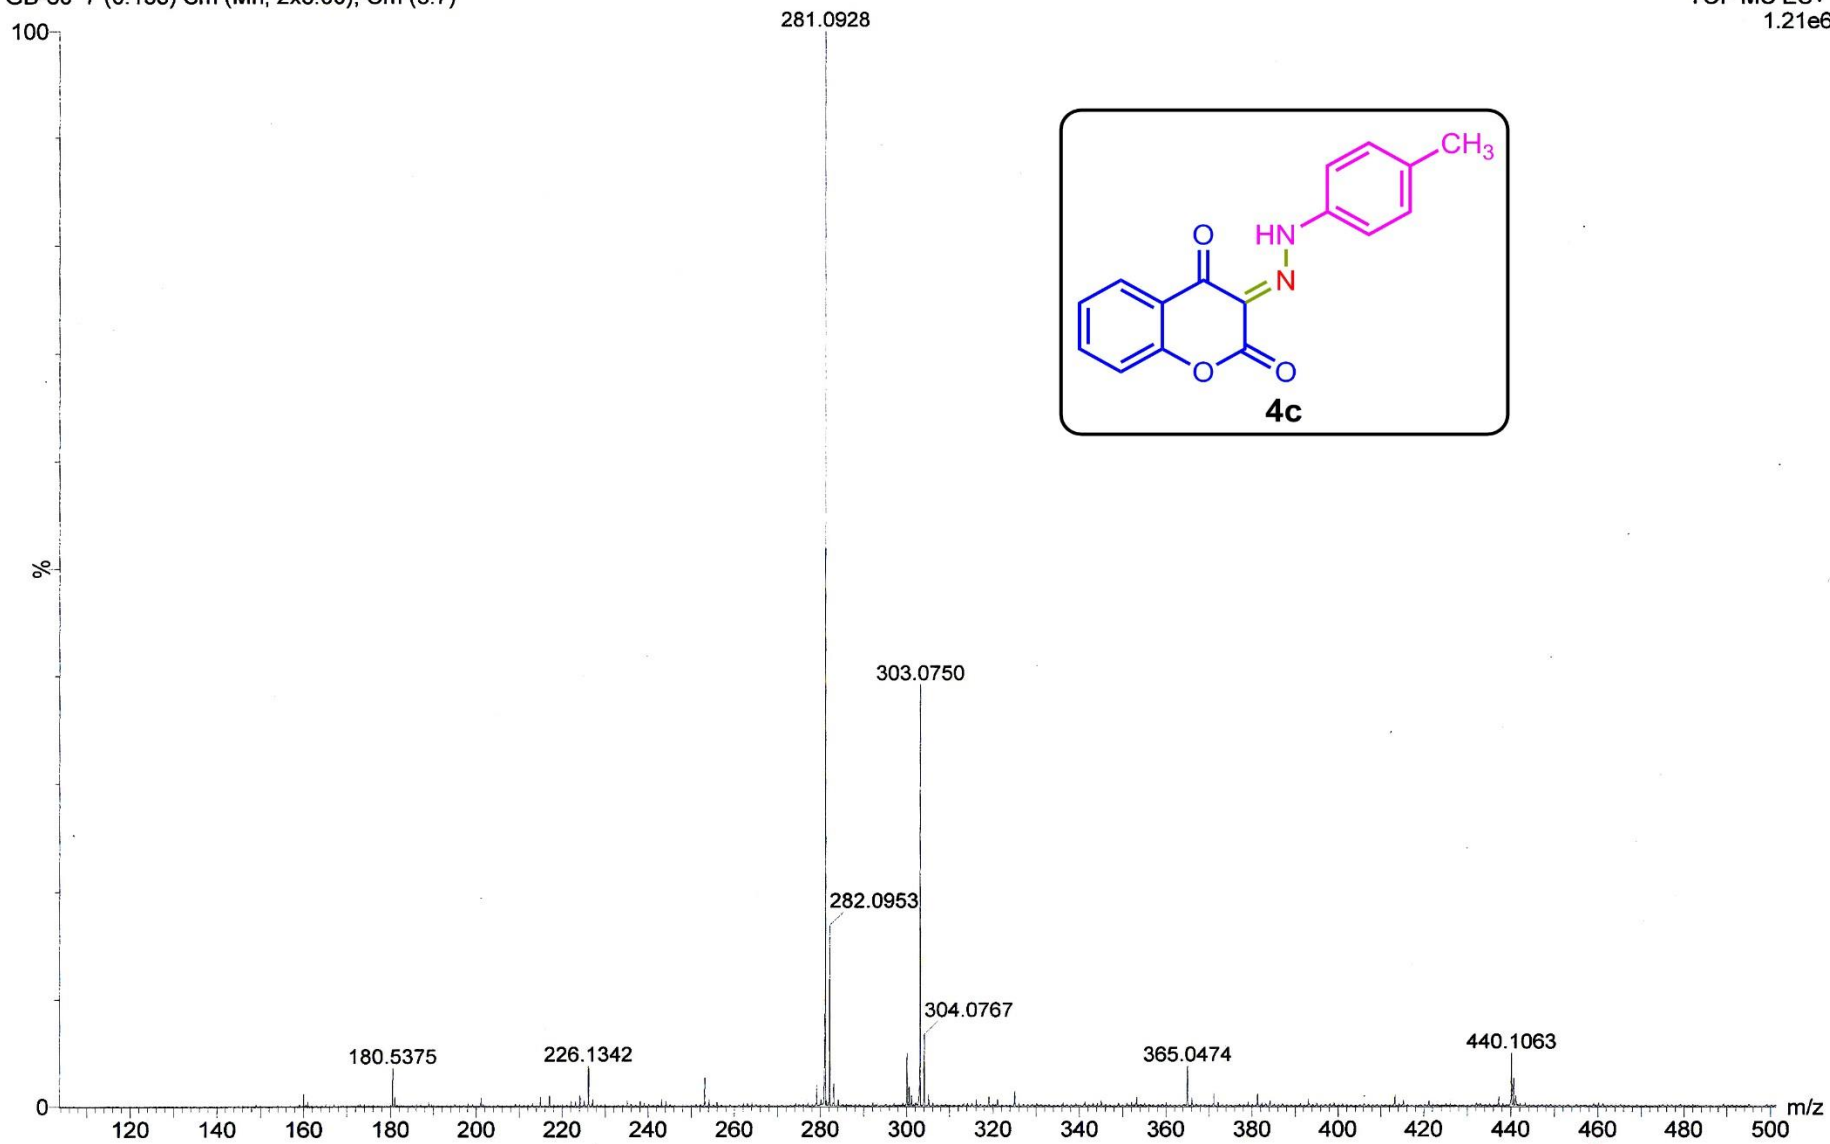

Figure S12. Mass spectra of (*E*)-3-(2-(*p*-tolyl)hydrazono)chroman-2,4-dione (**4c**)

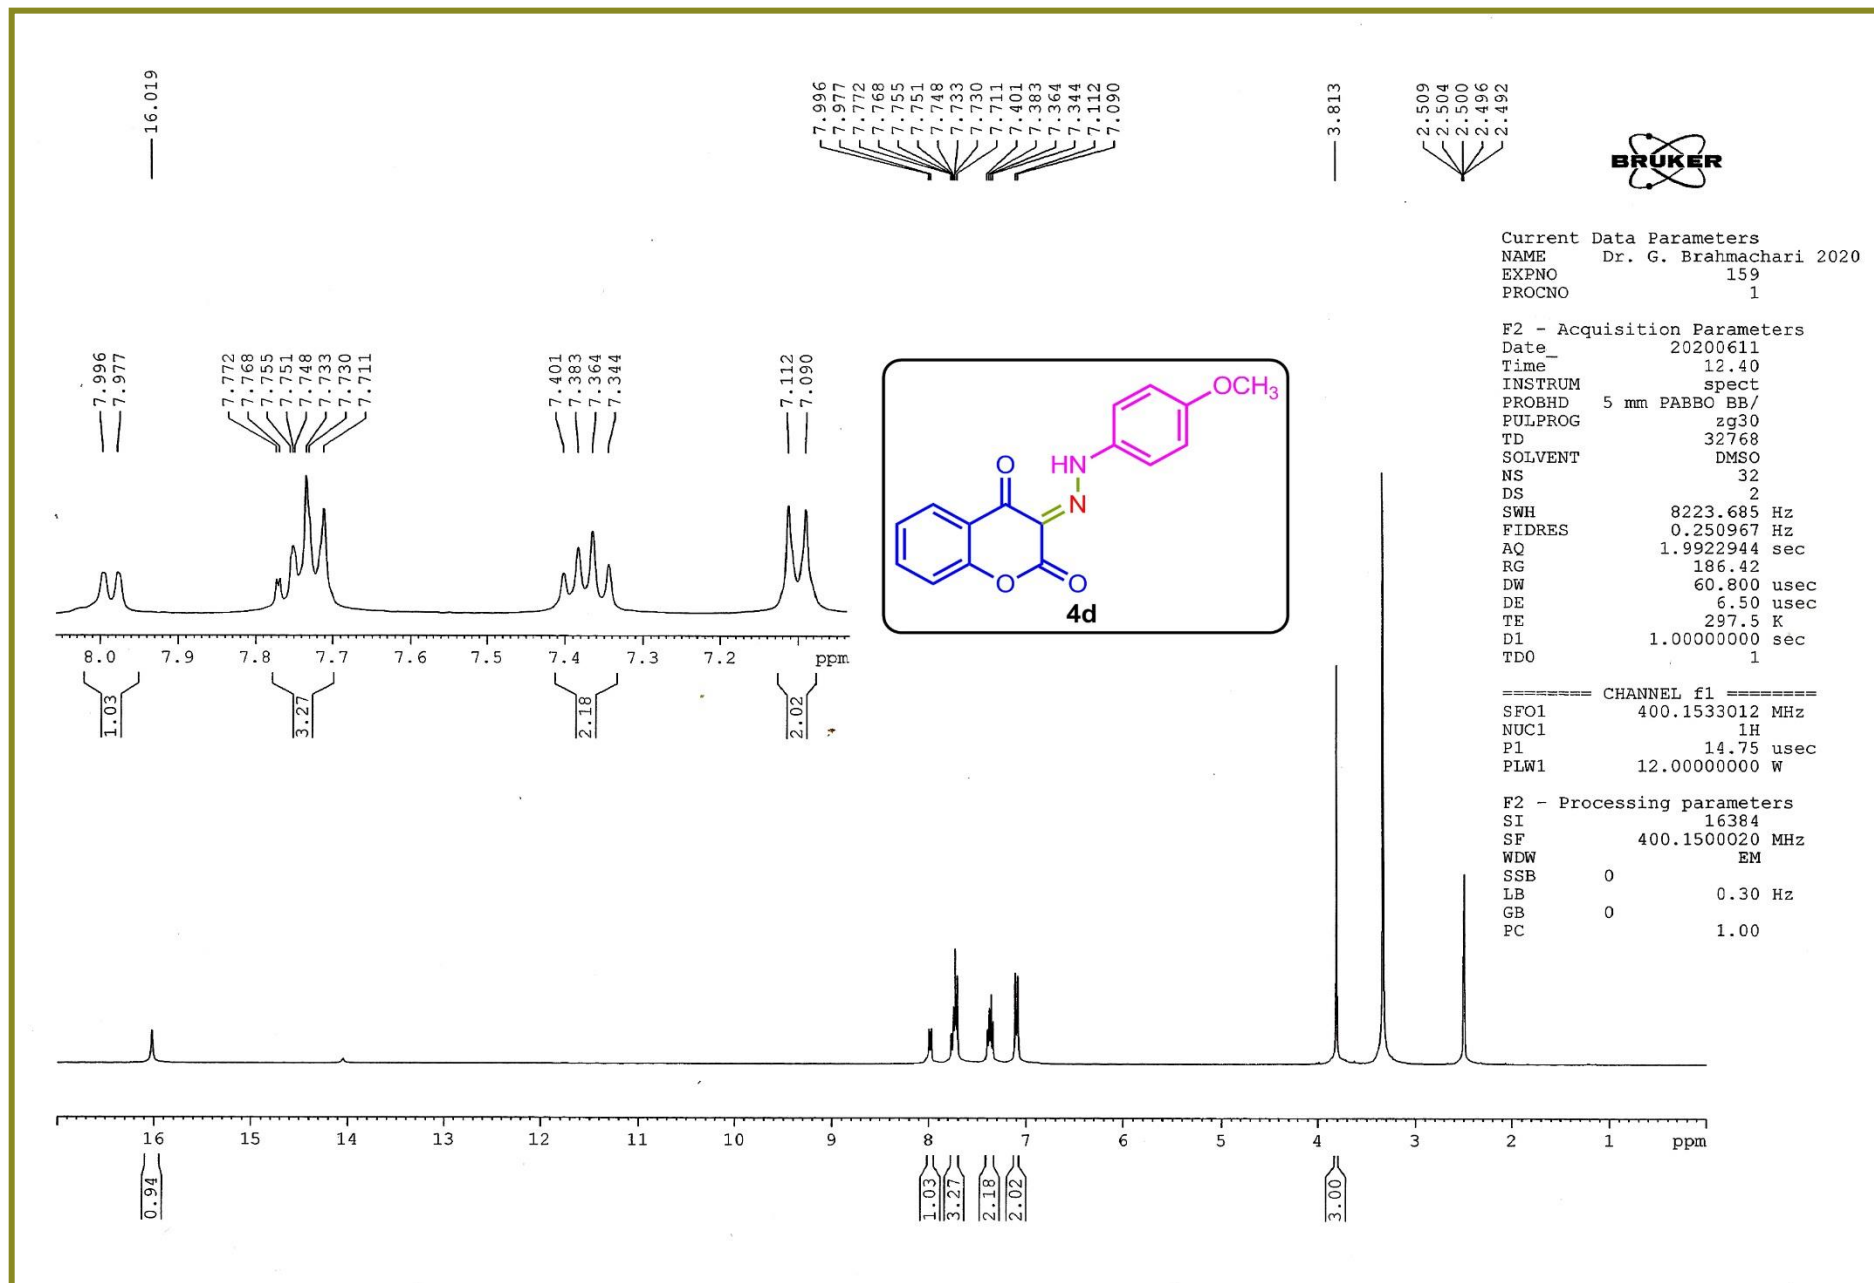

Figure S13. <sup>1</sup>H-NMR spectrum of (*E*)-3-(2-(4-methoxyphenyl)hydrazono)chroman-2,4-dione (**4d**)

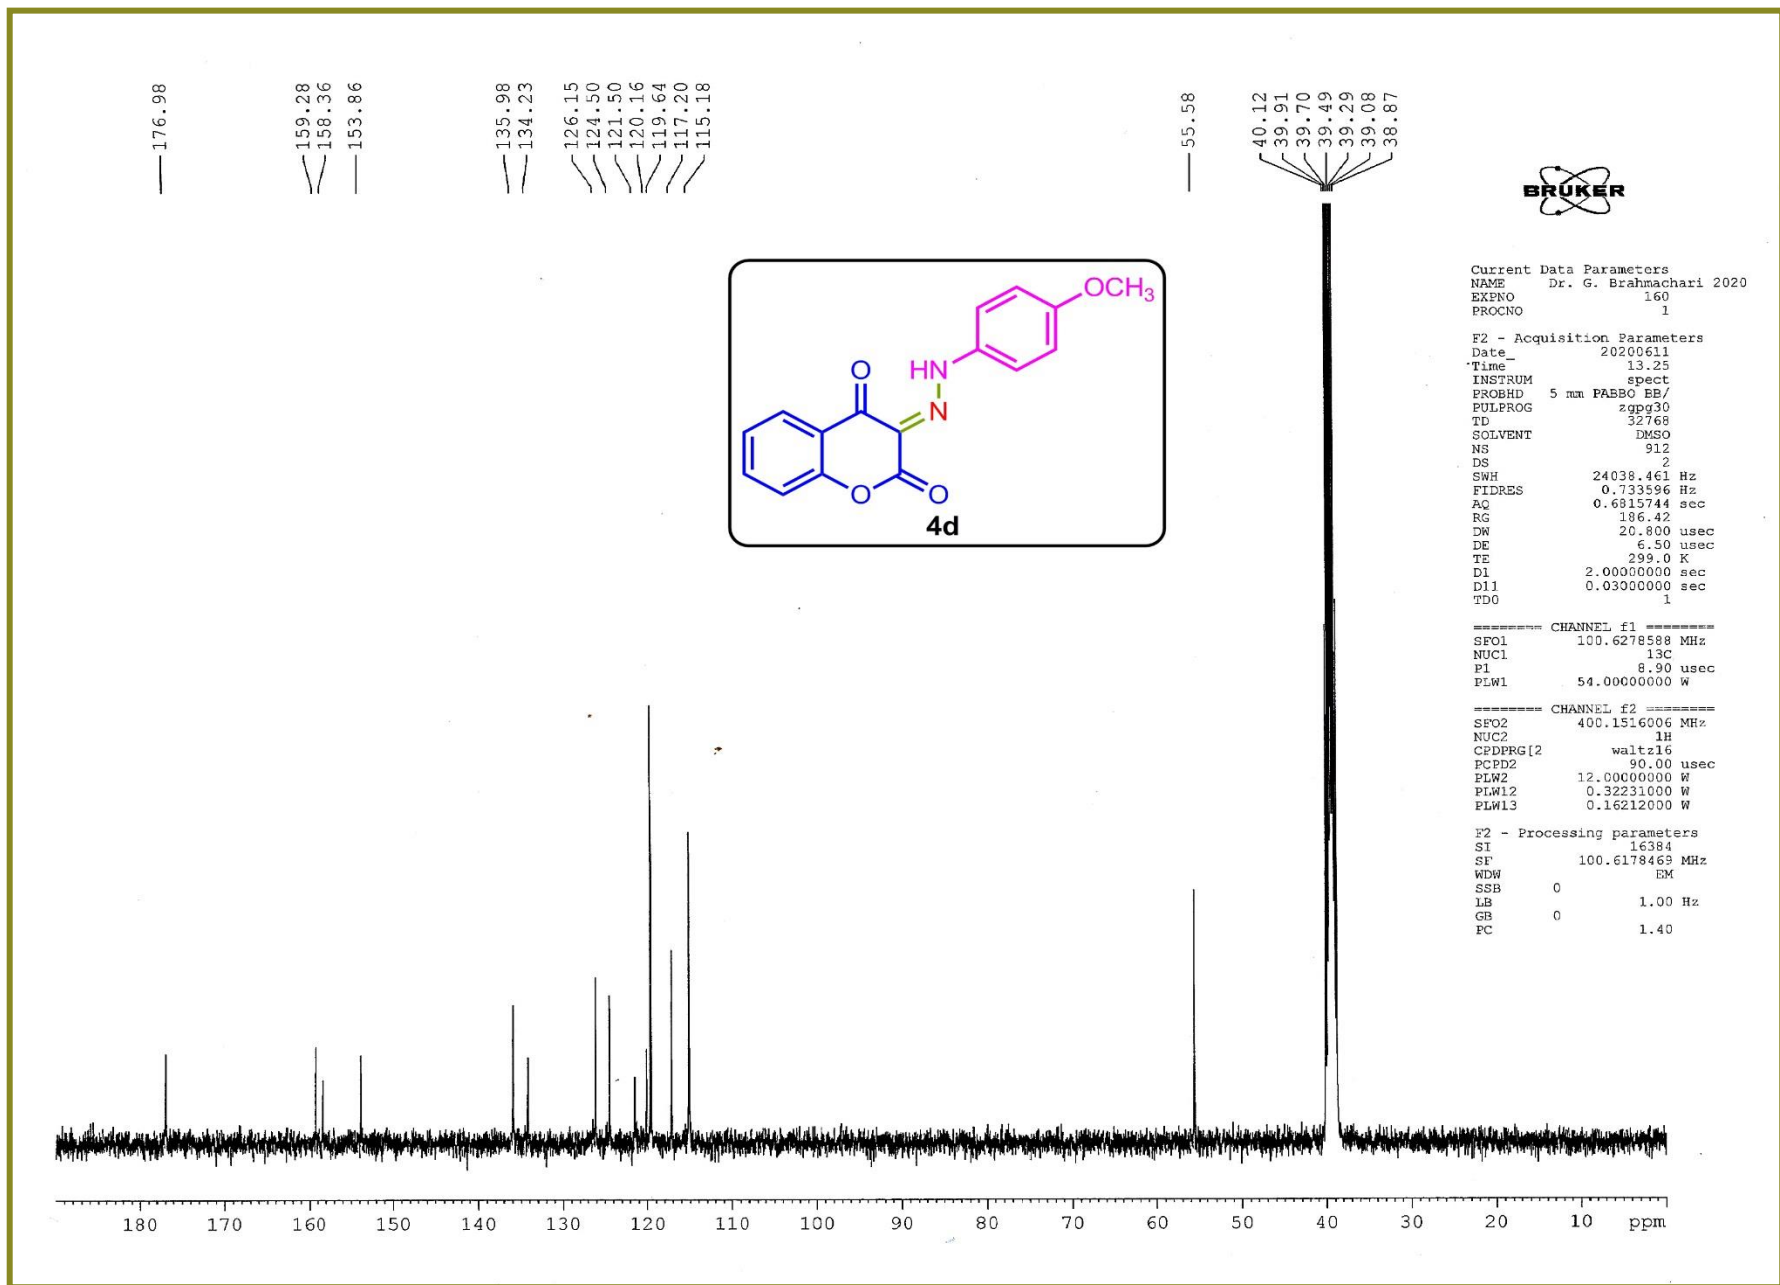

Figure S14. <sup>13</sup>C-NMR spectrum of (*E*)-3-(2-(4-methoxyphenyl)hydrazono)chroman-2,4-dione (**4d**)

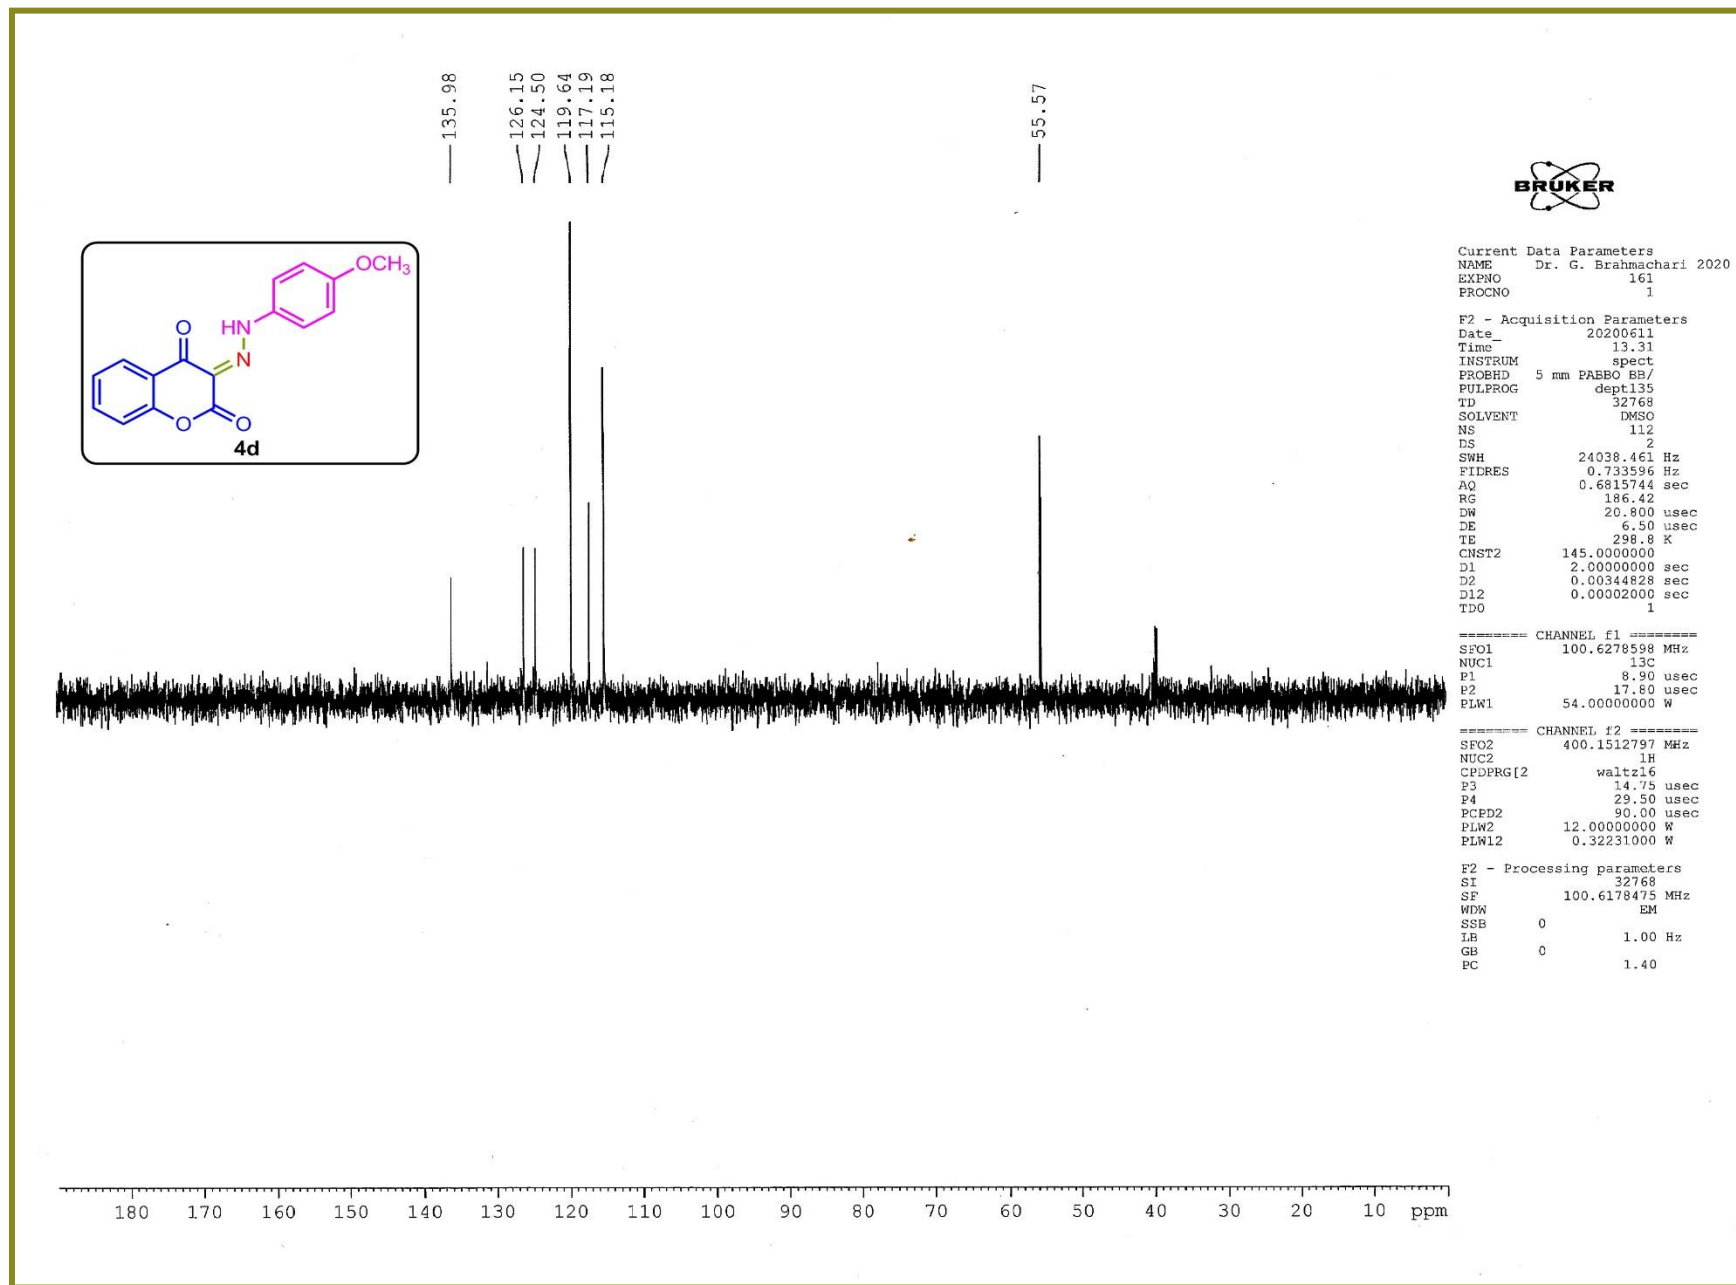

Figure S15. DEPT-135 NMR spectrum of (*E*)-3-(2-(4-methoxyphenyl)hydrazono)chroman-2,4-dione (**4d**)

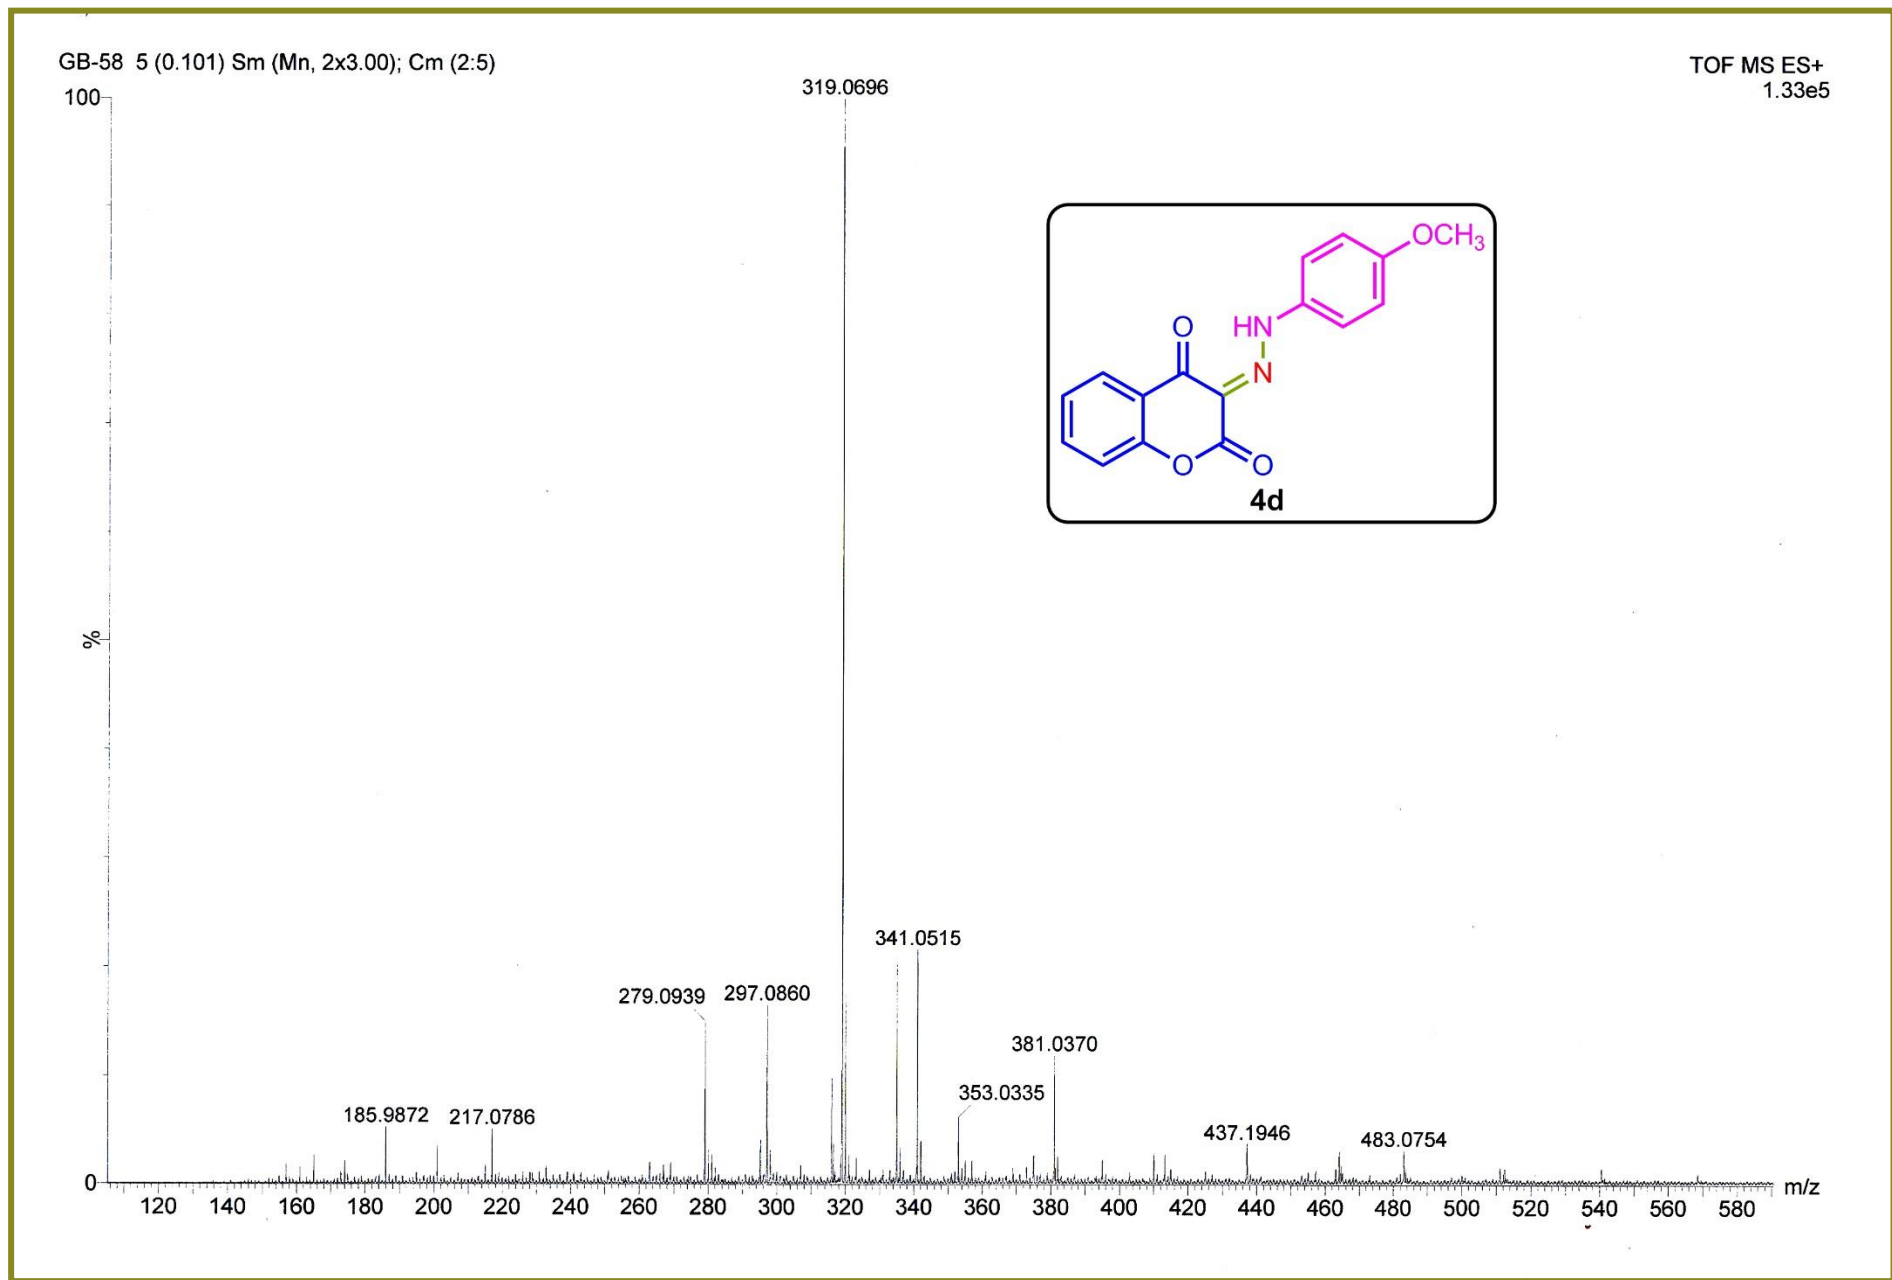

Figure S16. Mass spectra of (*E*)-3-(2-(4-methoxyphenyl)hydrazono)chroman-2,4-dione (**4d**)

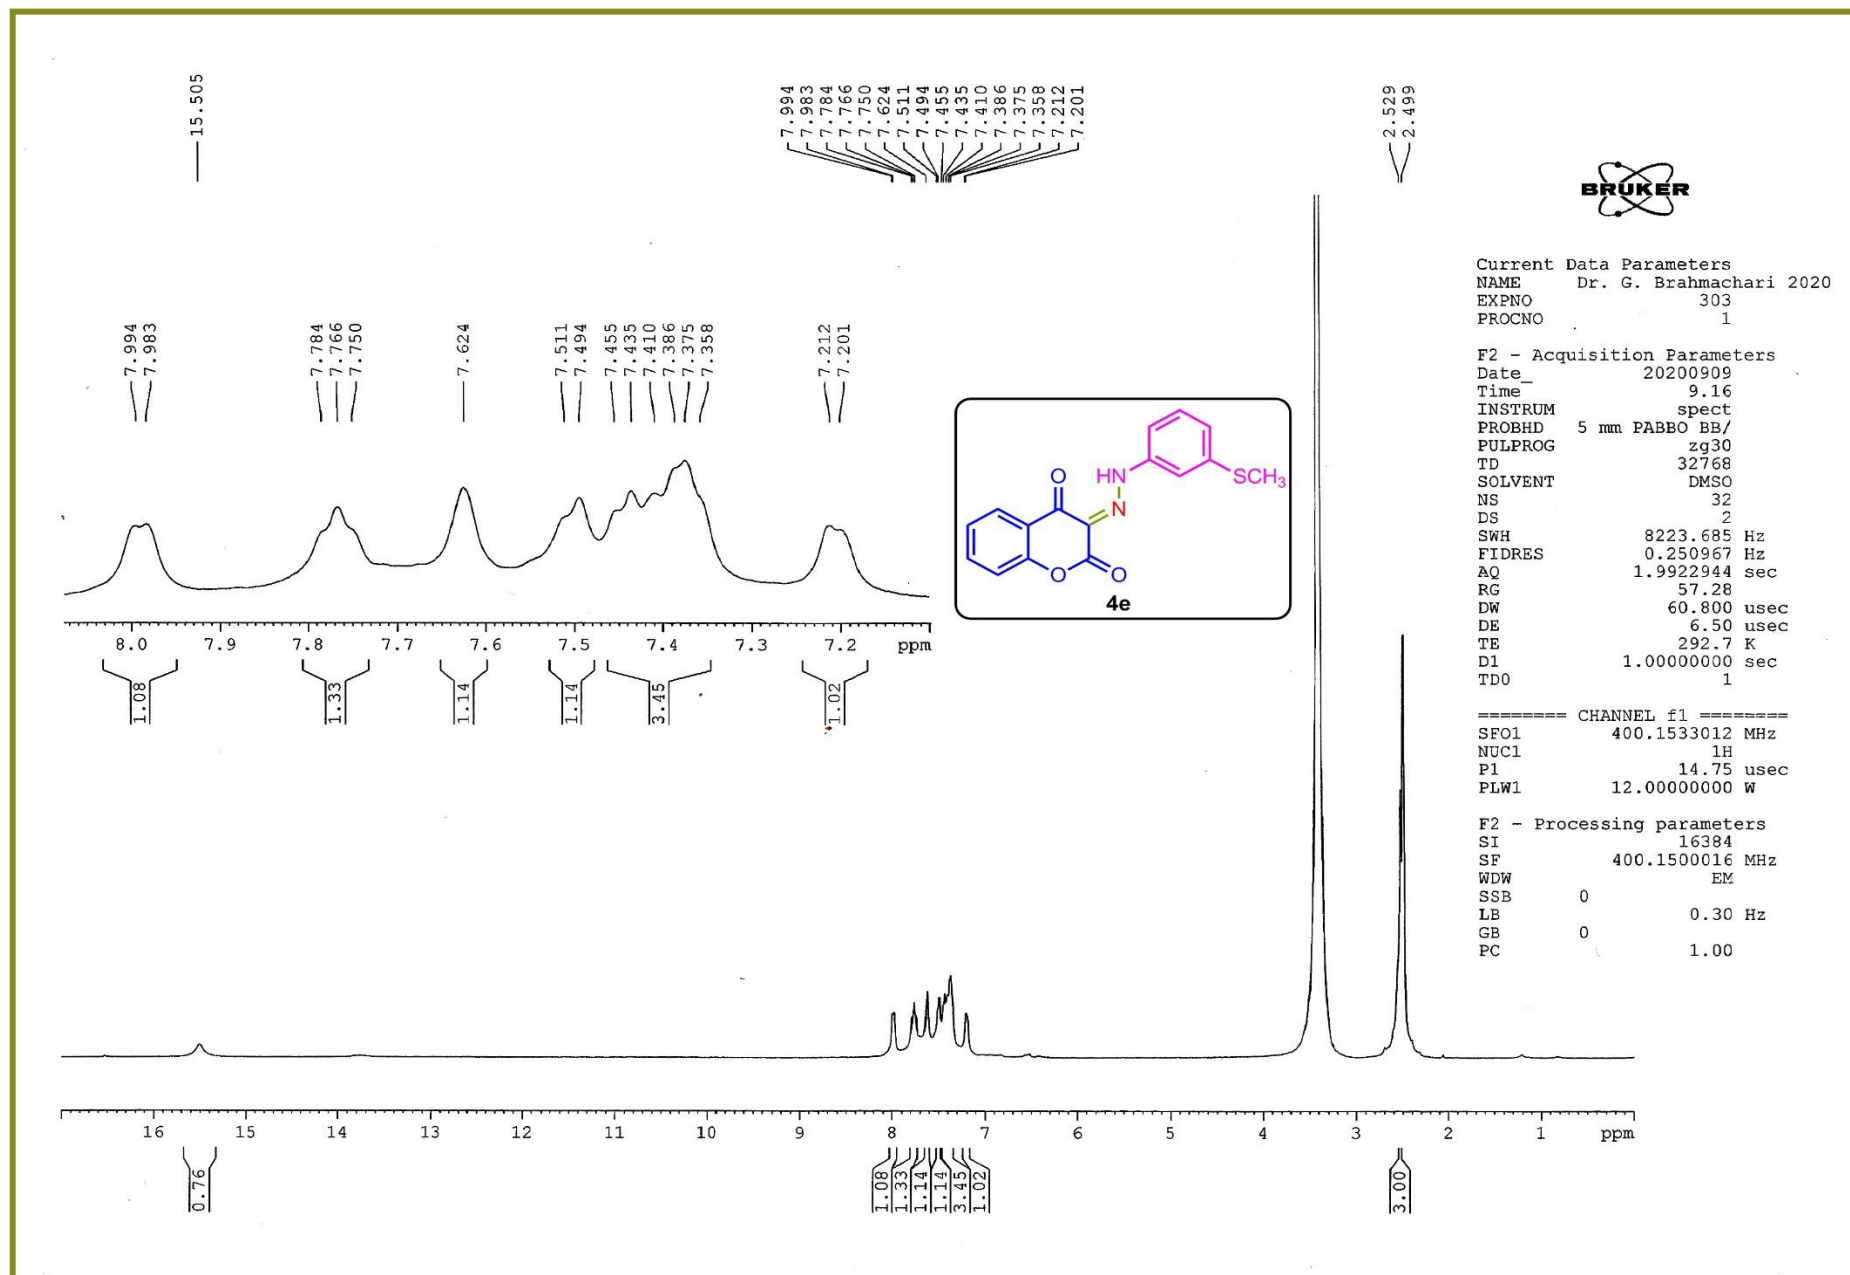

Figure S17. <sup>1</sup>H-NMR spectrum of (*E*)-3-(2-(3-(methylthio)phenyl)hydrazono)chroman-2,4-dione (**4e**)

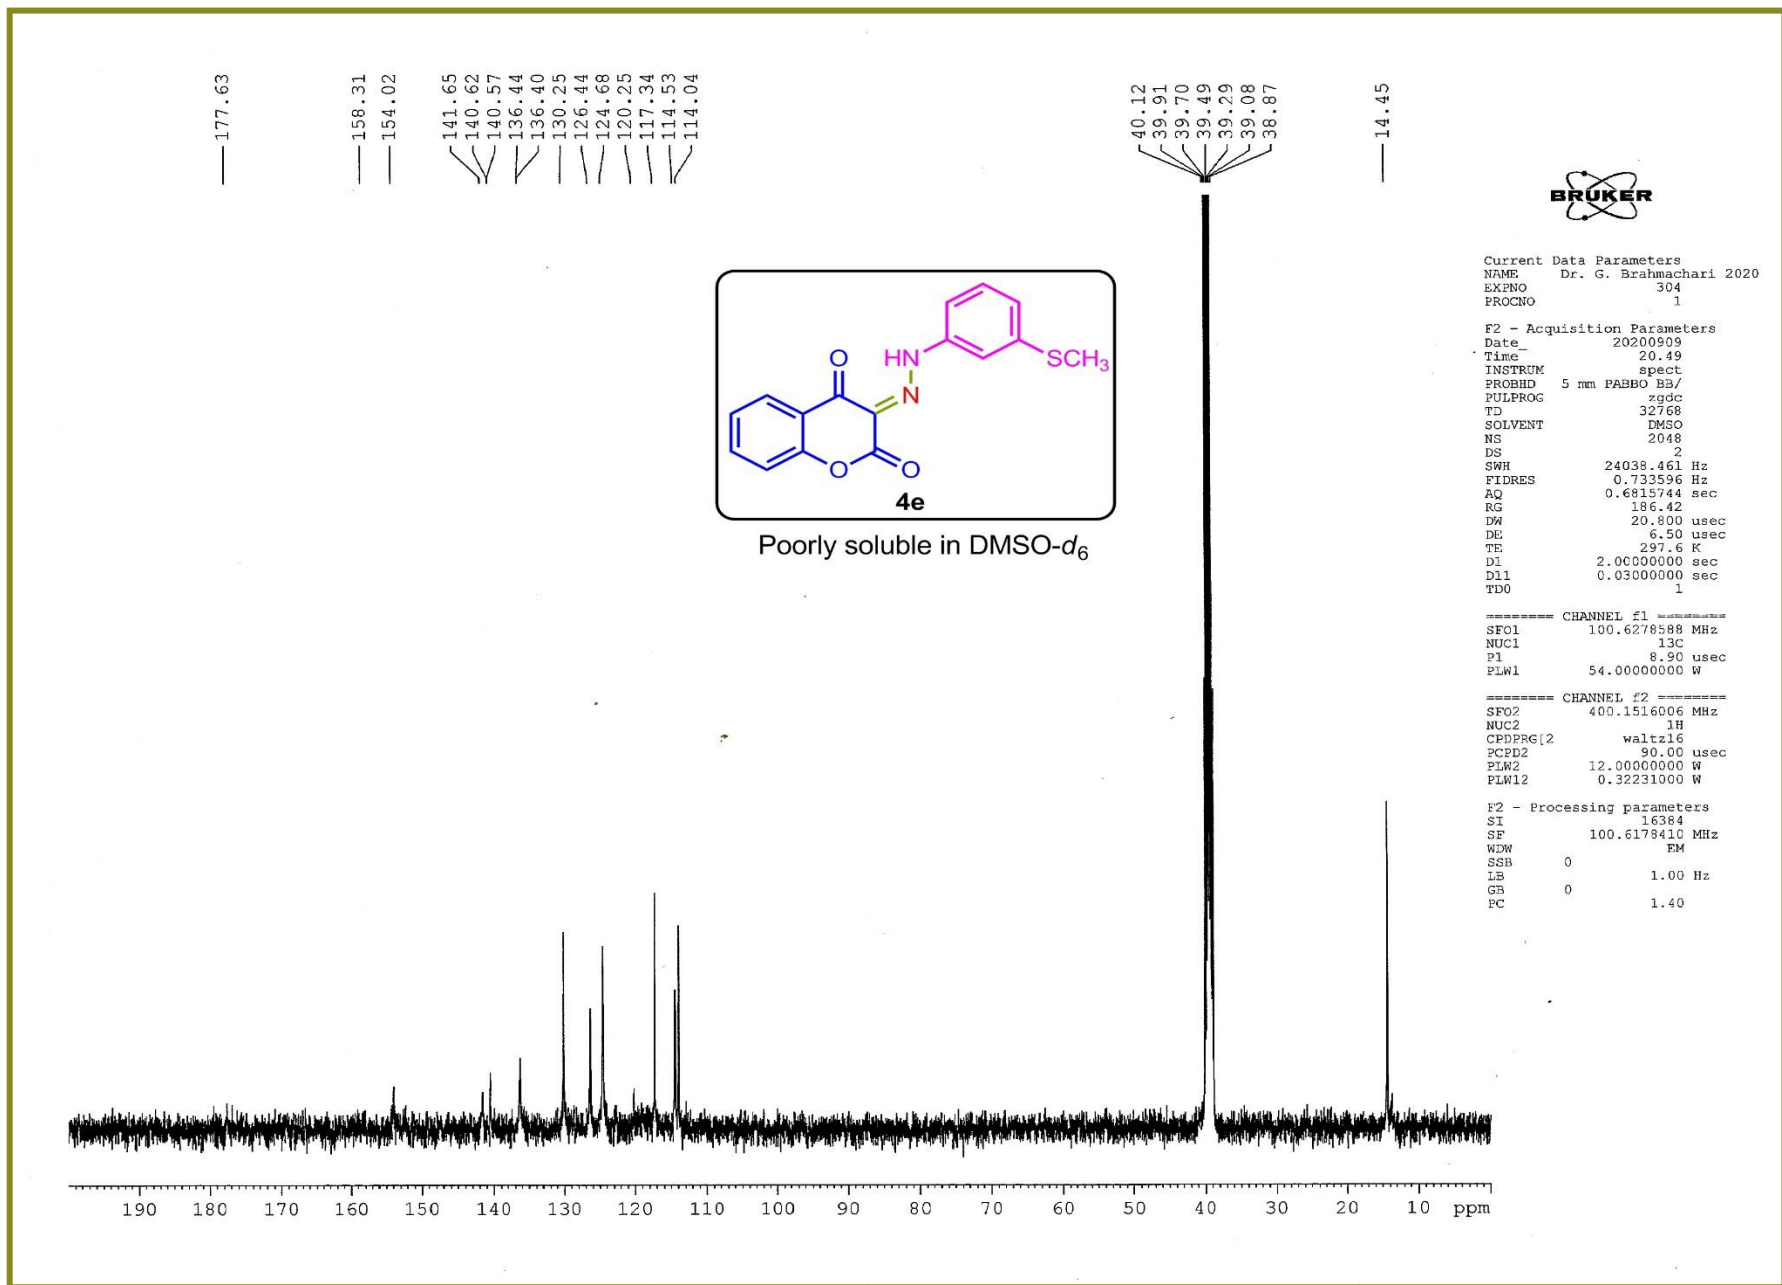

Figure S18.  $^{13}\text{C}$ -NMR spectrum of (*E*)-3-(2-(3-(methylthio)phenyl)hydrazono)chroman-2,4-dione (**4e**)



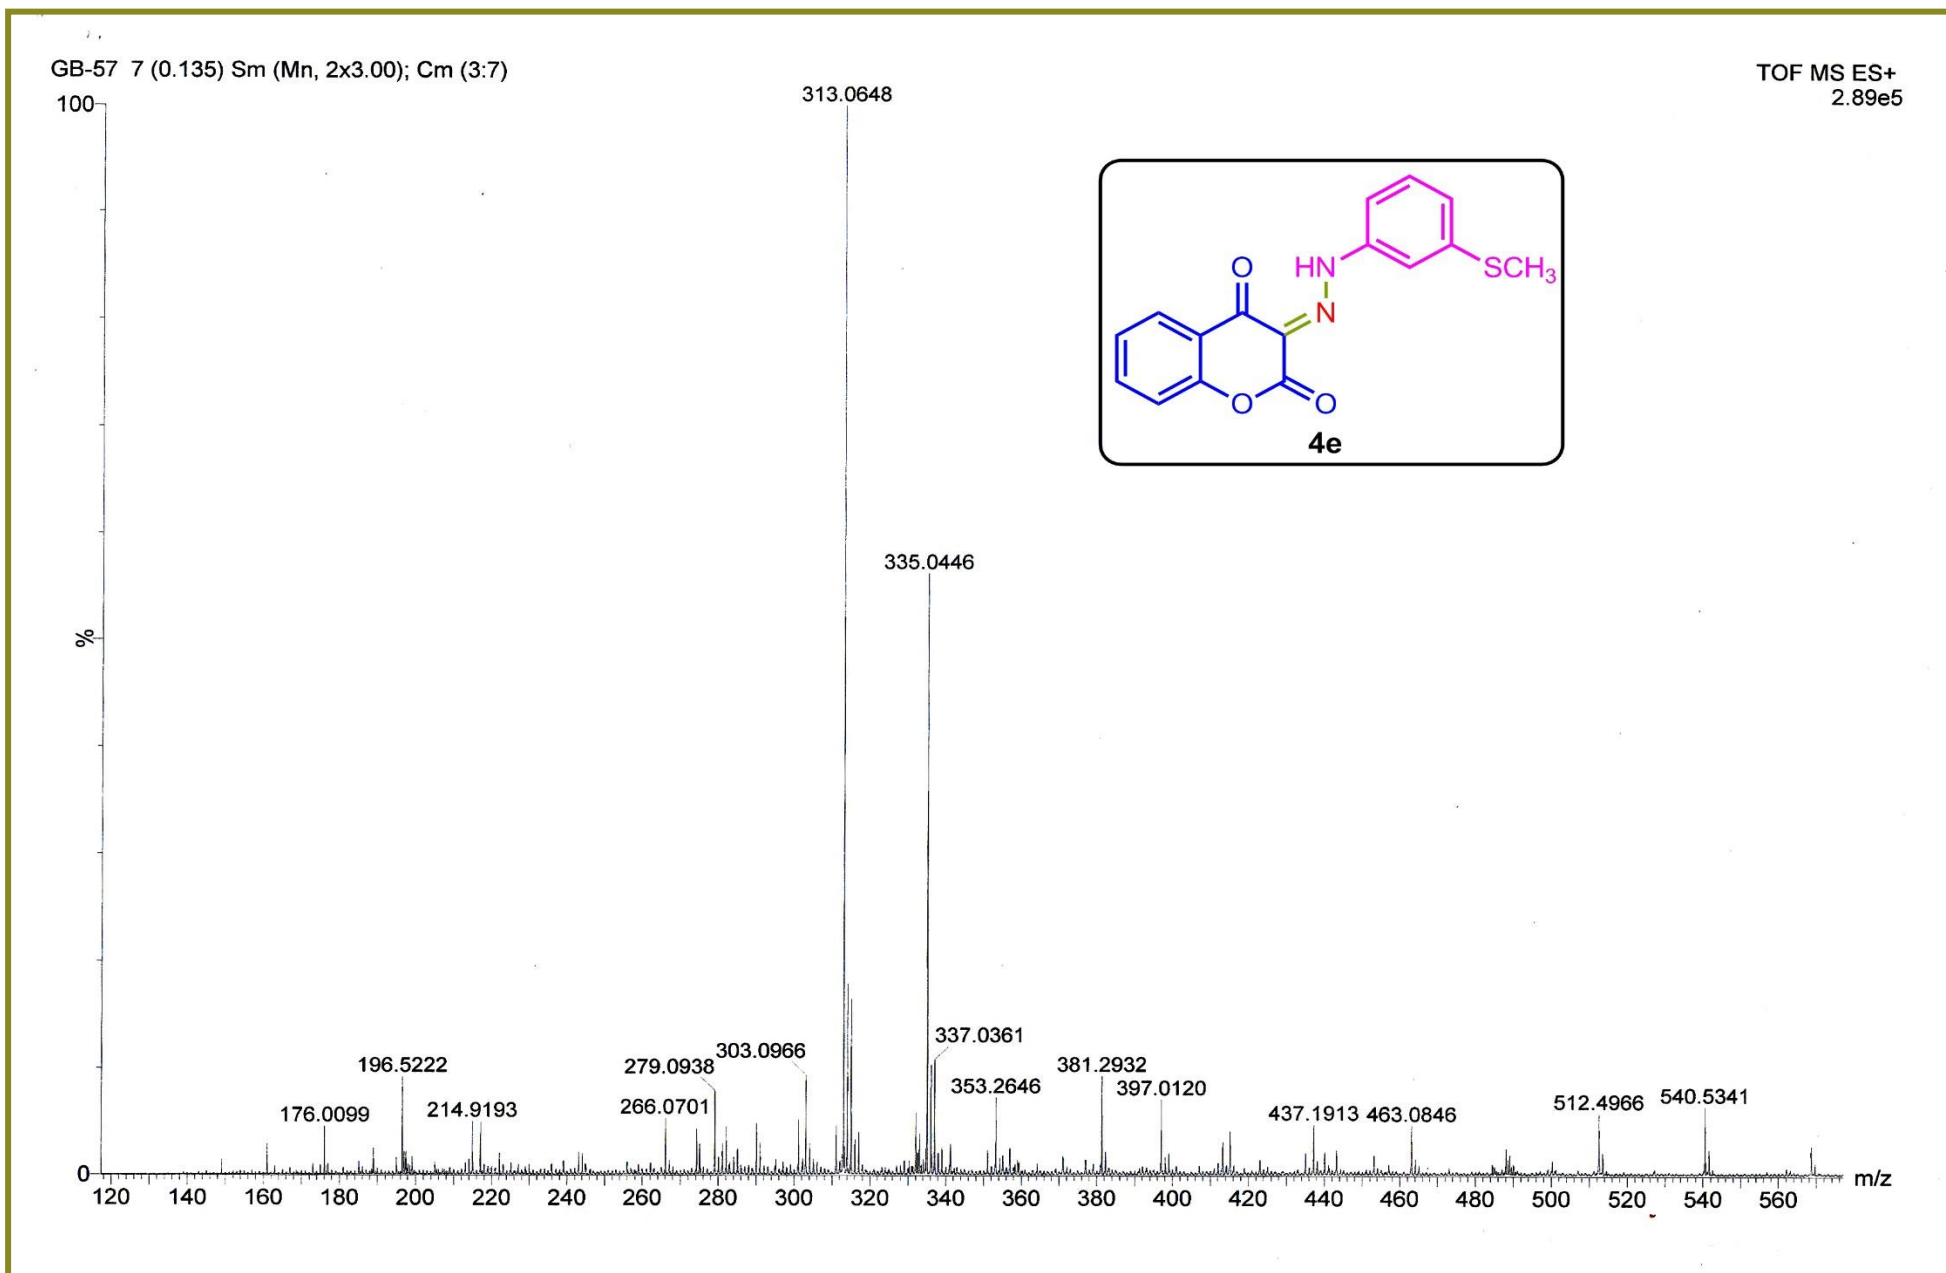

Figure S19. Mass spectra of (*E*)-3-(2-(3-(methylthio)phenyl)hydrazono)chroman-2,4-dione (**4e**)

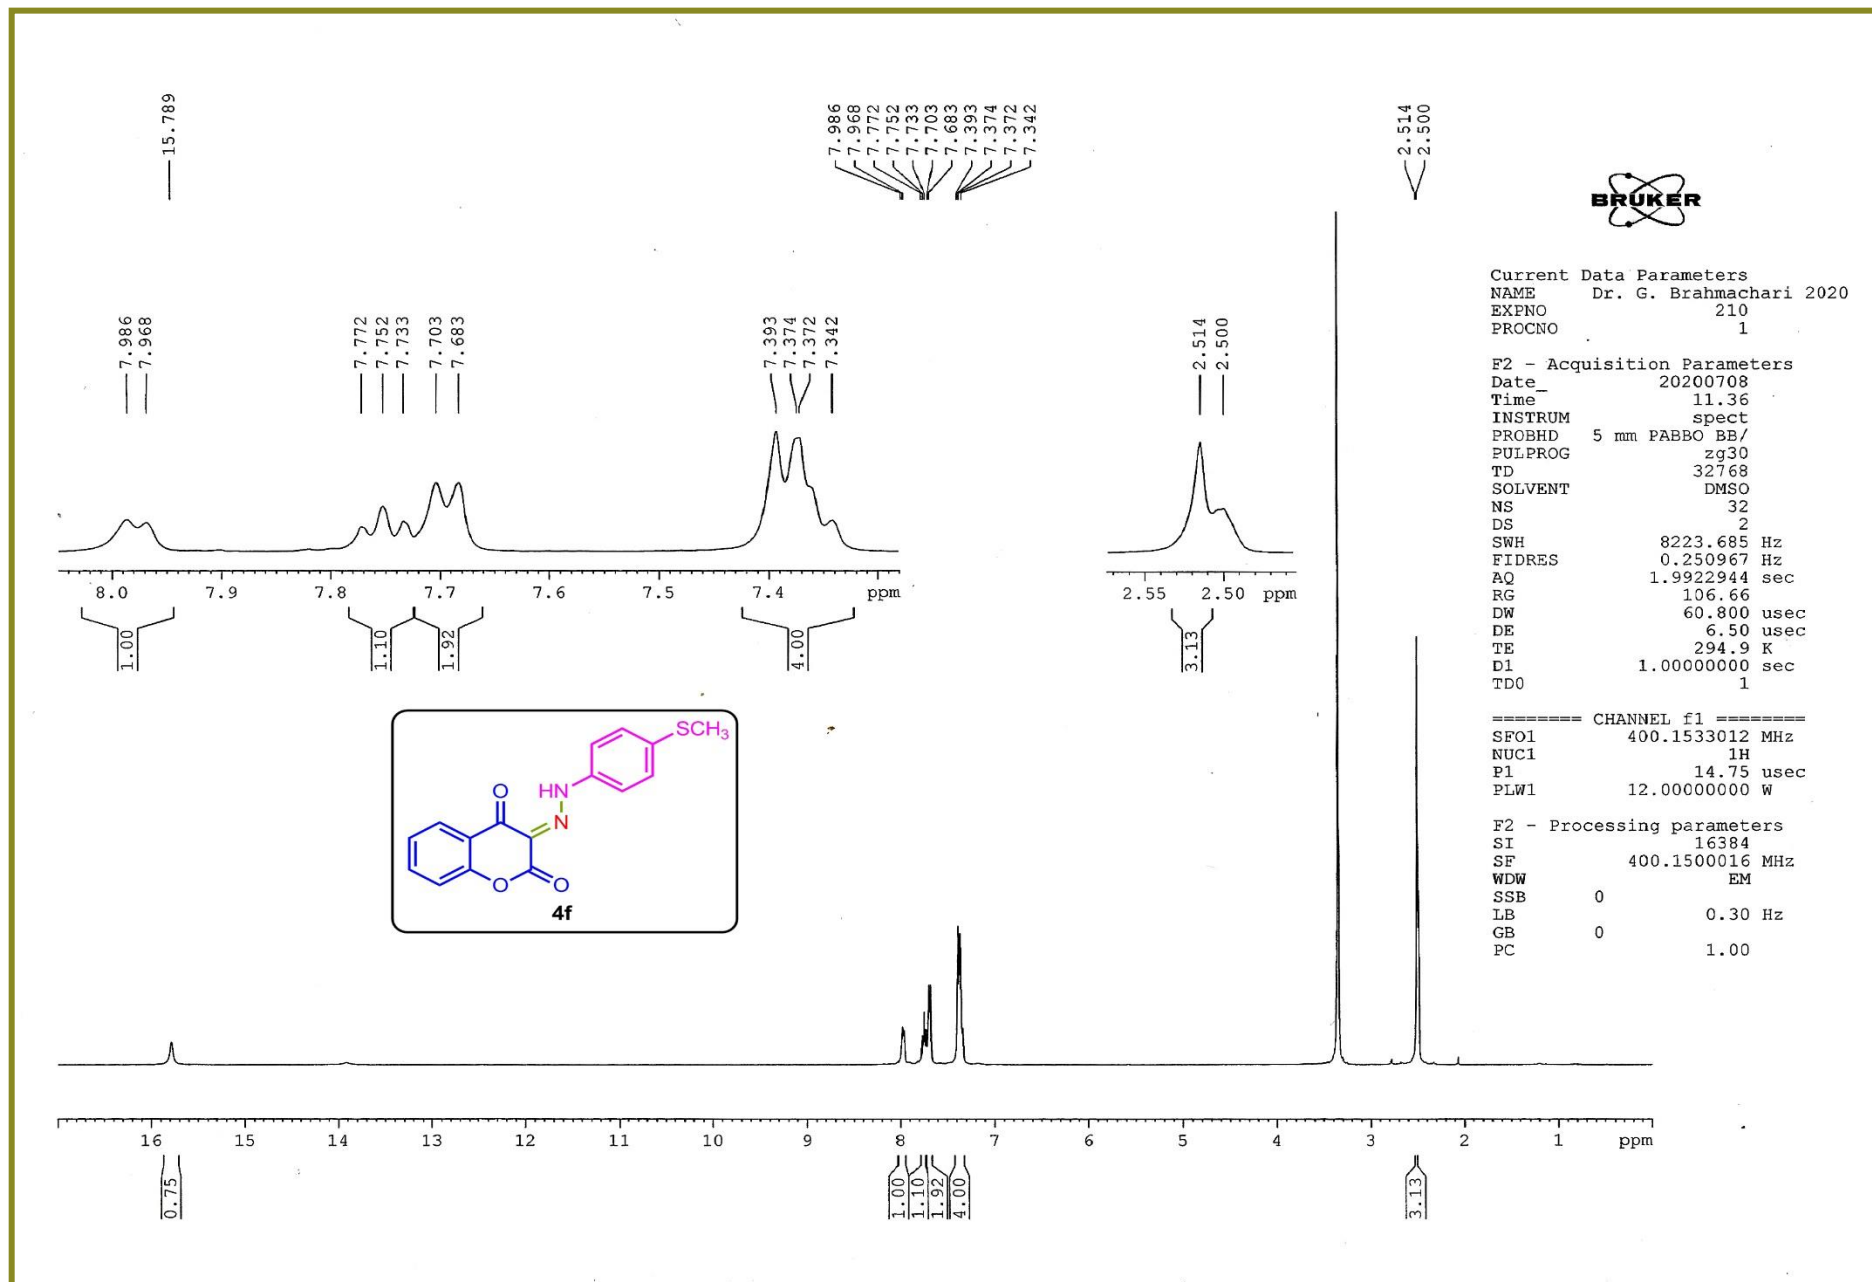

Figure S20. <sup>1</sup>H-NMR spectrum of (*E*)-3-(2-(4-(methylthio)phenyl)hydrazono)chroman-2,4-dione (**4f**)

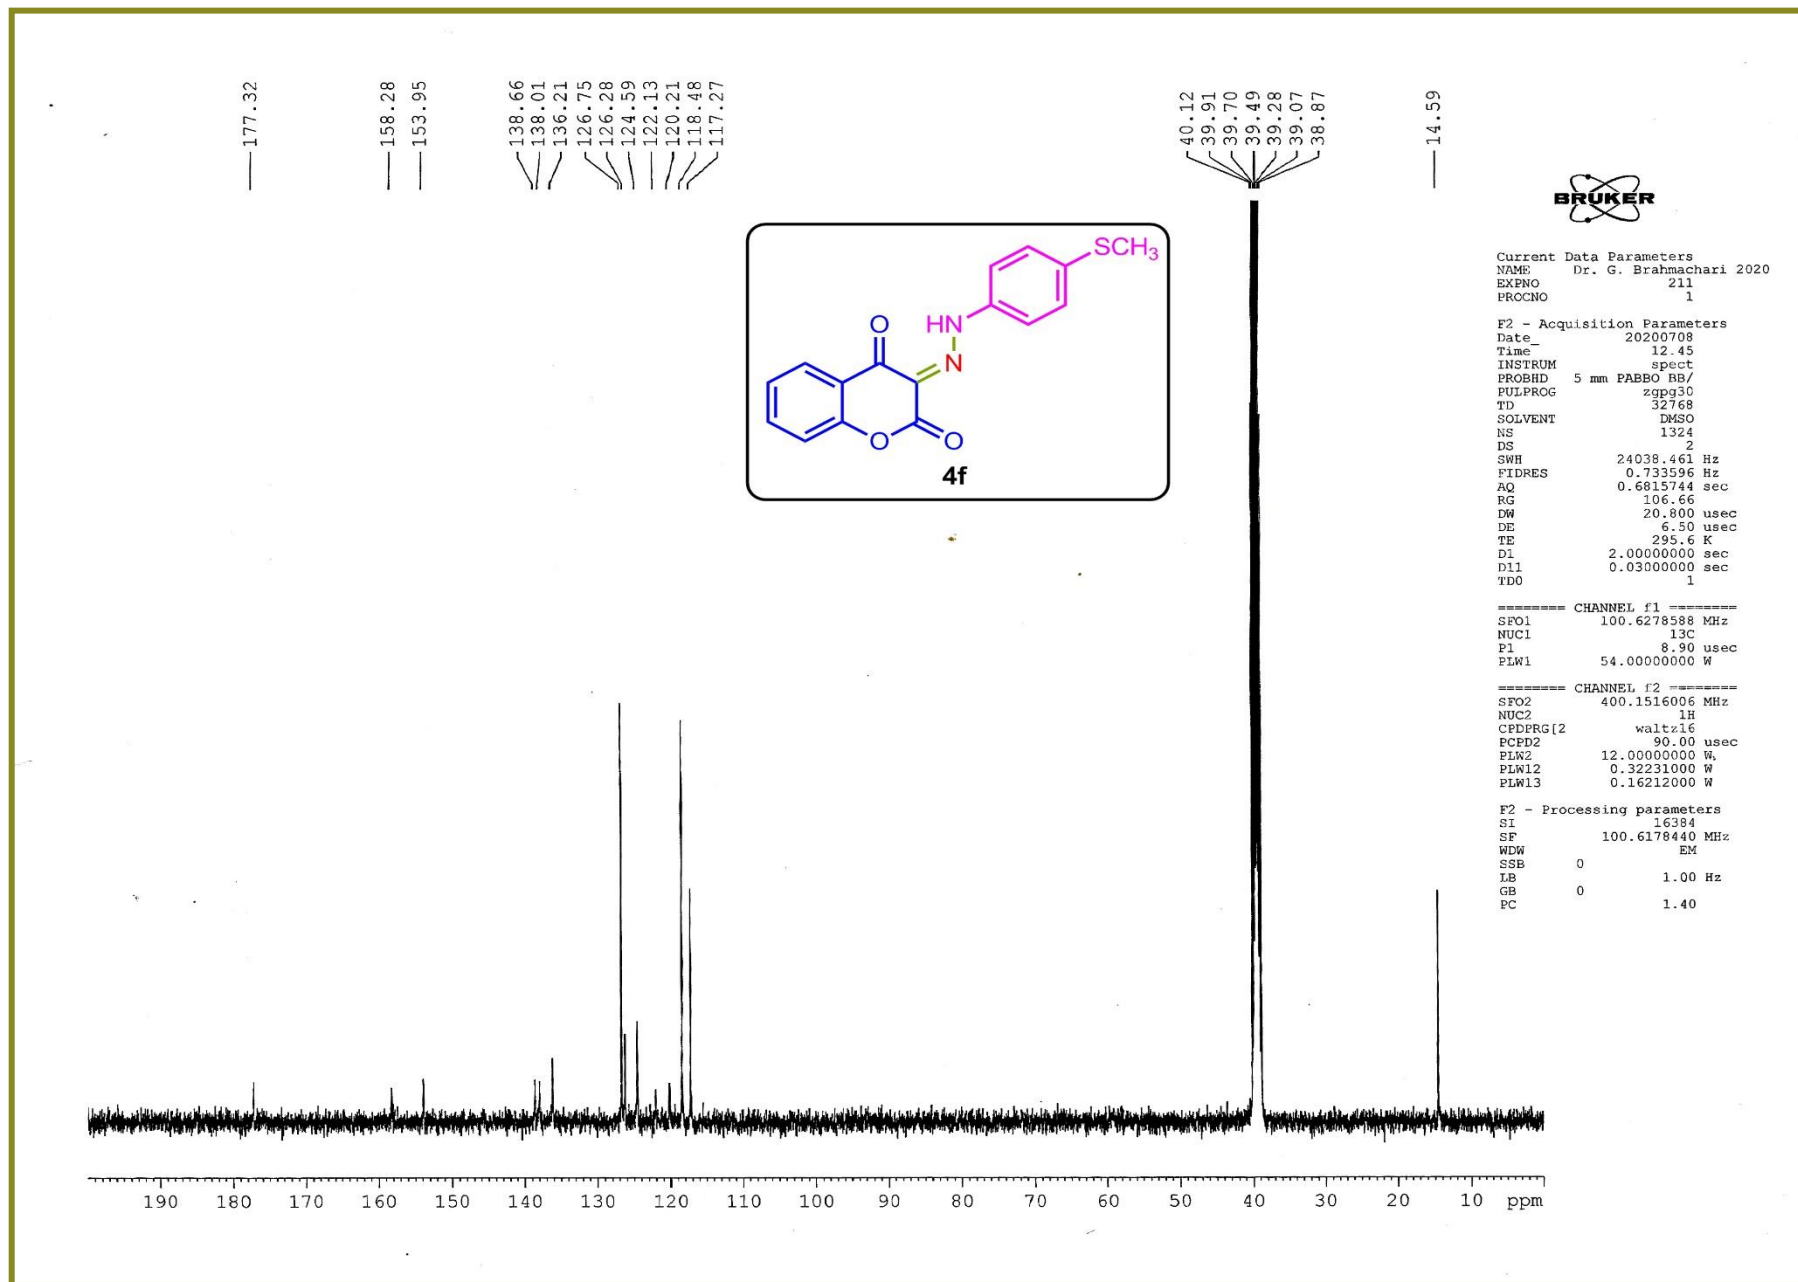

Figure S21. <sup>13</sup>C-NMR spectrum of (*E*)-3-(2-(4-(methylthio)phenyl)hydrazono)chroman-2,4-dione (**4f**)

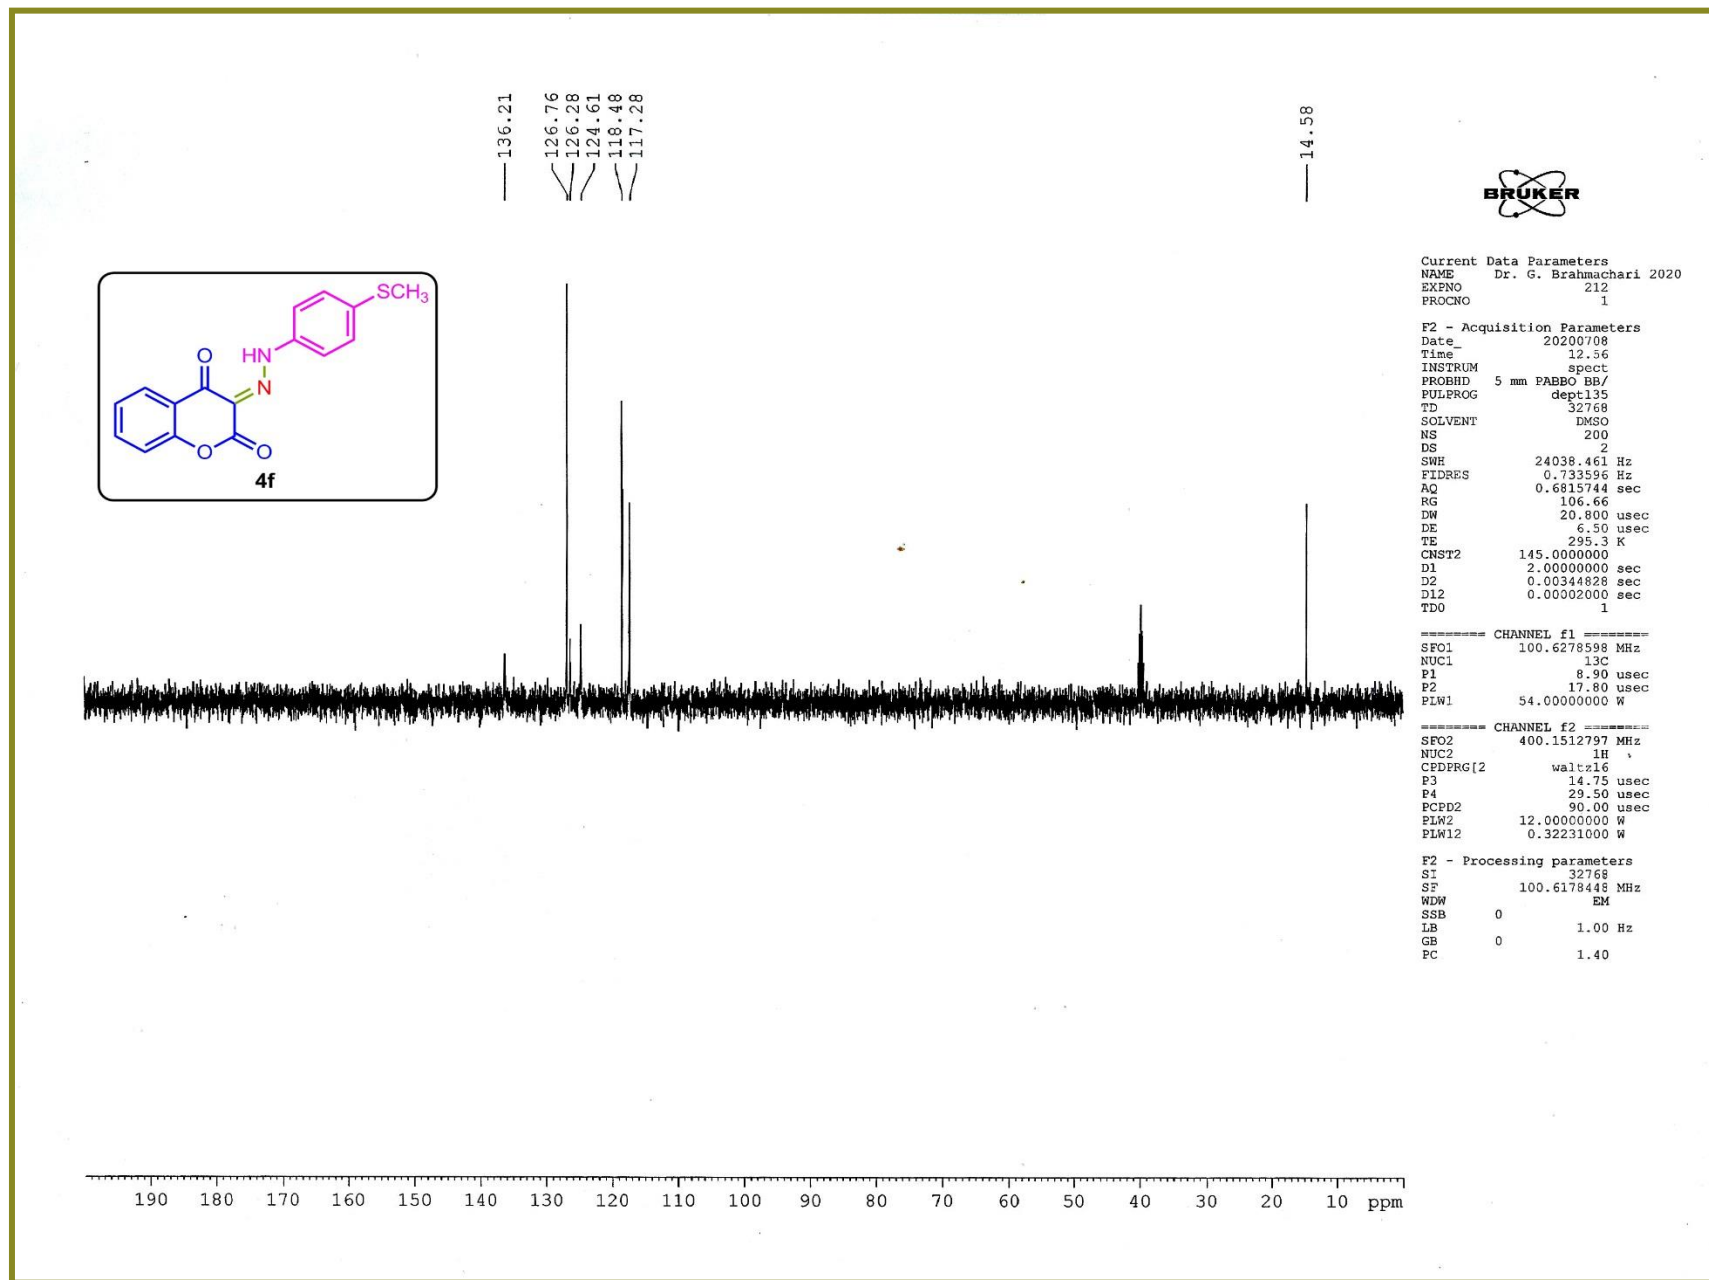

Figure S22. DEPT-135 NMR spectrum of (*E*)-3-(2-(4-(methylthio)phenyl)hydrazono)chroman-2,4-dione (**4f**)

GB-11 6 (0.118) Sm (Mn, 2x3.00); Cm (3:10)

TOF MS ES+  
2.27e6

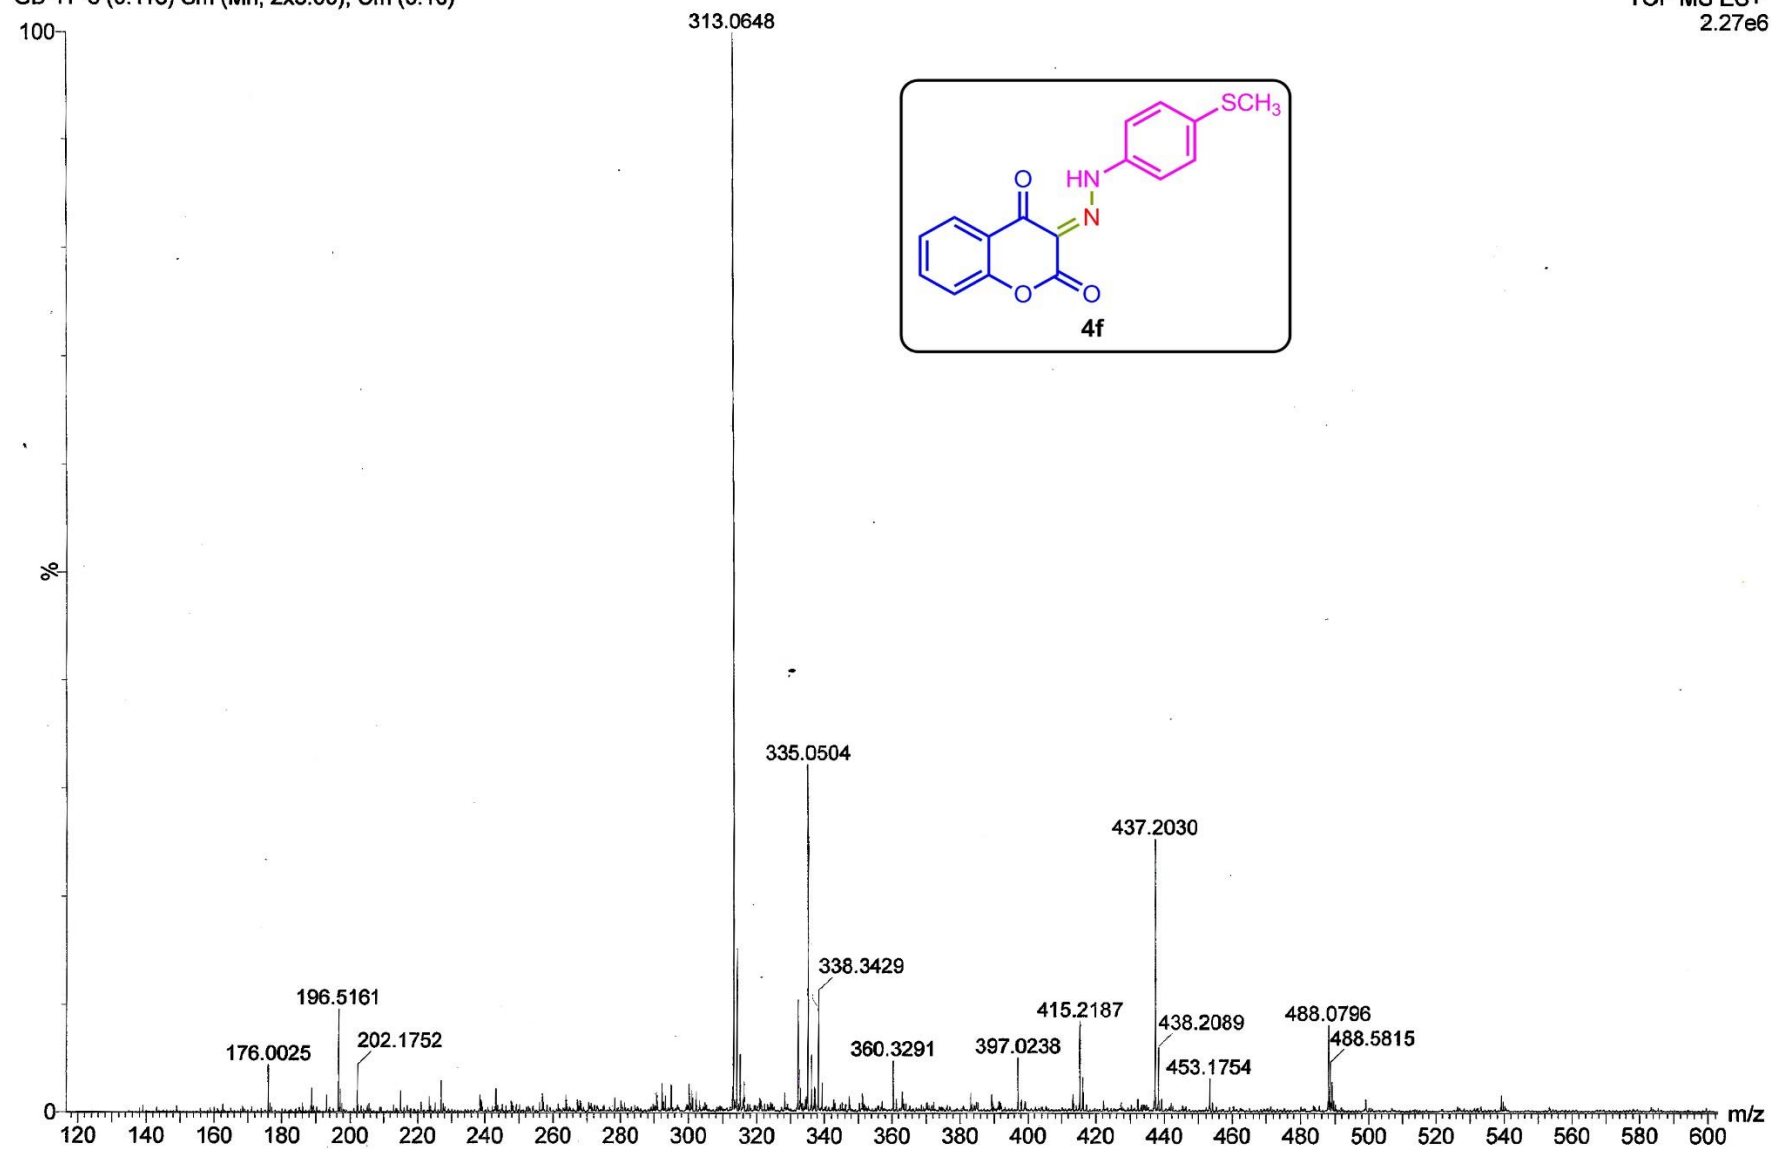

Figure S23. Mass spectra of (*E*)-3-(2-(4-(methylthio)phenyl)hydrazono)chroman-2,4-dione (**4f**)

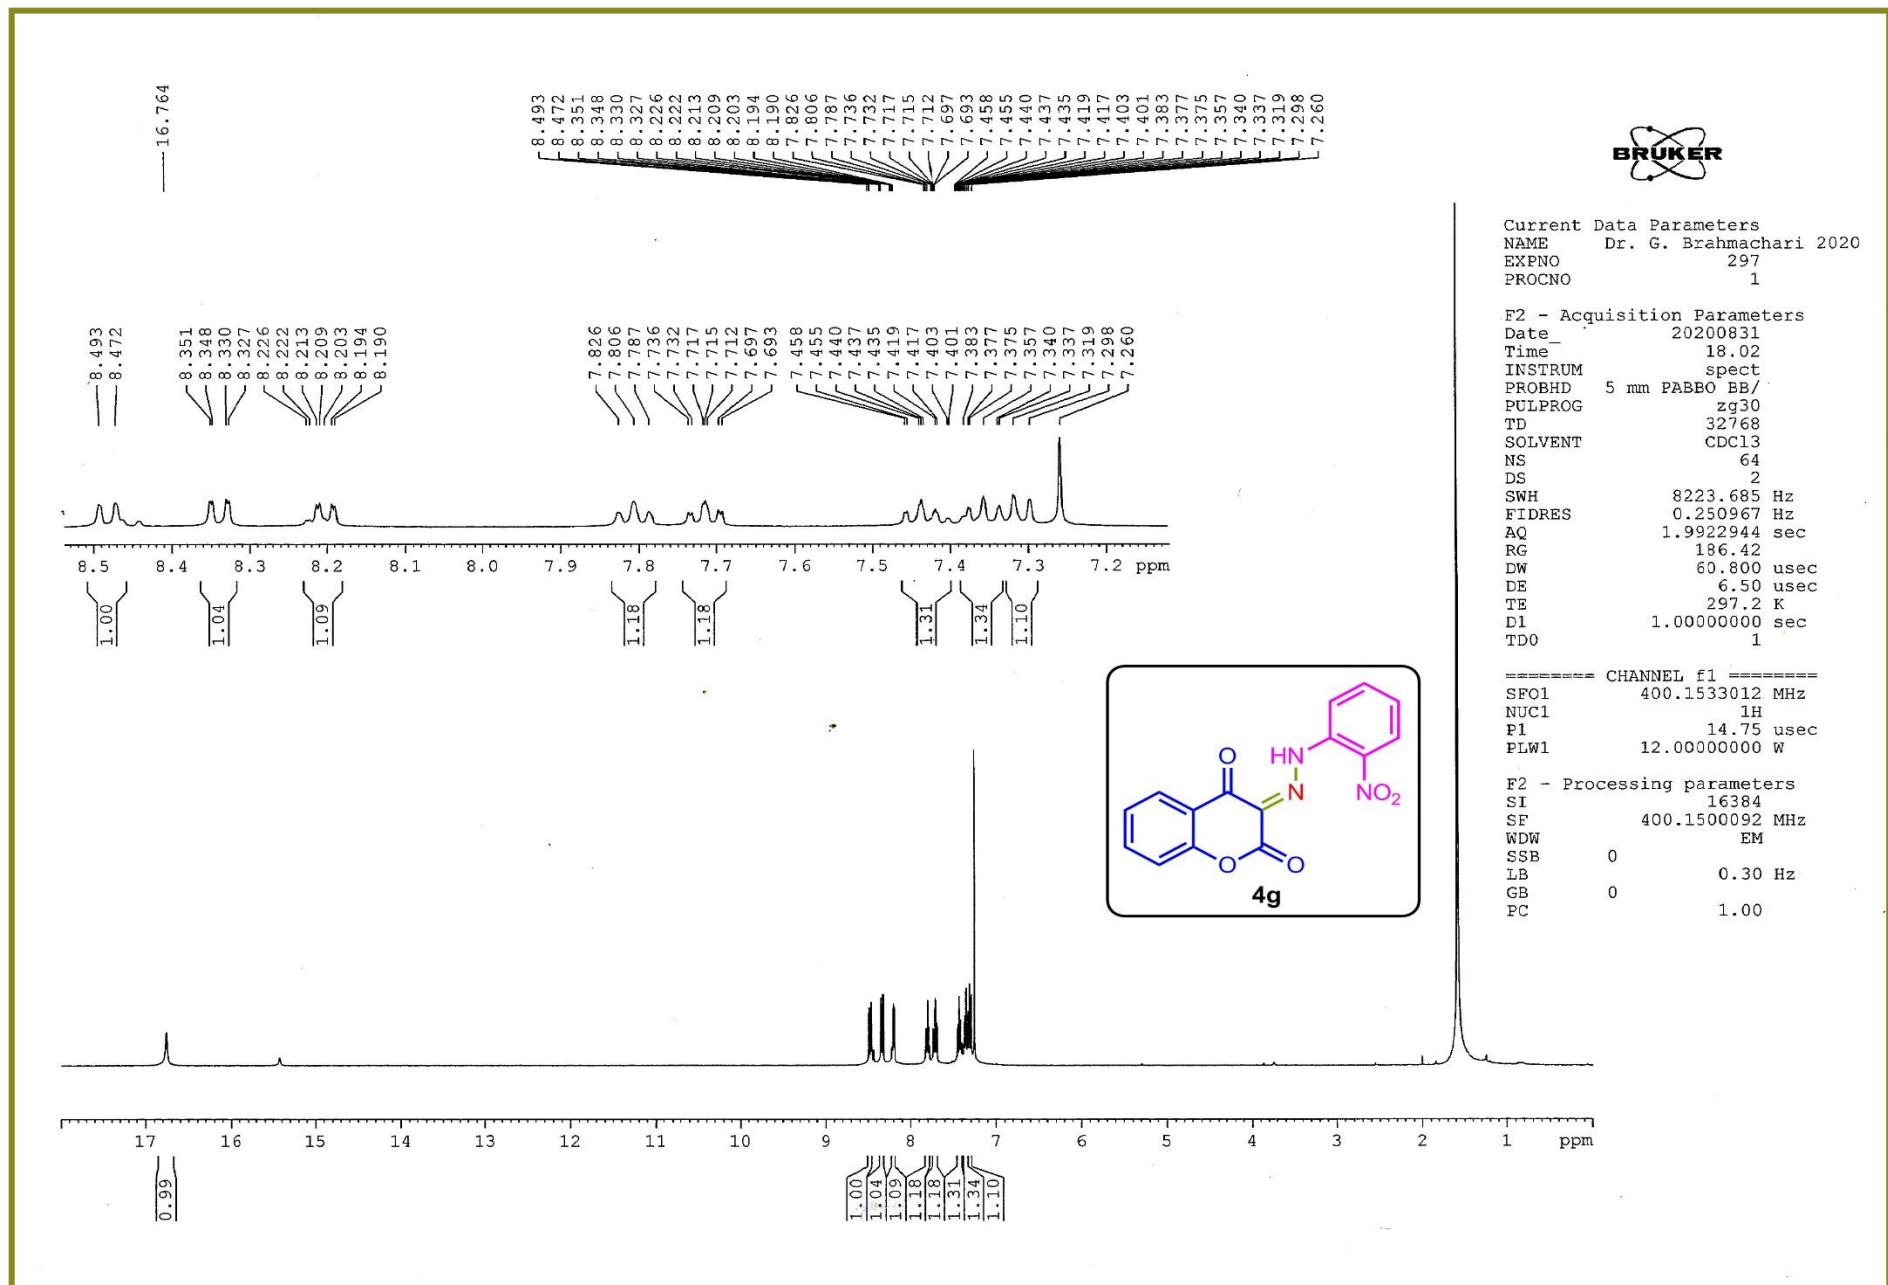

Figure S24. <sup>1</sup>H-NMR spectrum of (*E*)-3-(2-(2-nitrophenyl)hydrazono)chroman-2,4-dione (**4g**)

GB-55 3 (0.068) Sm (Mn, 2x3.00); Cm (2:8)

TOF MS ES+  
7.04e5

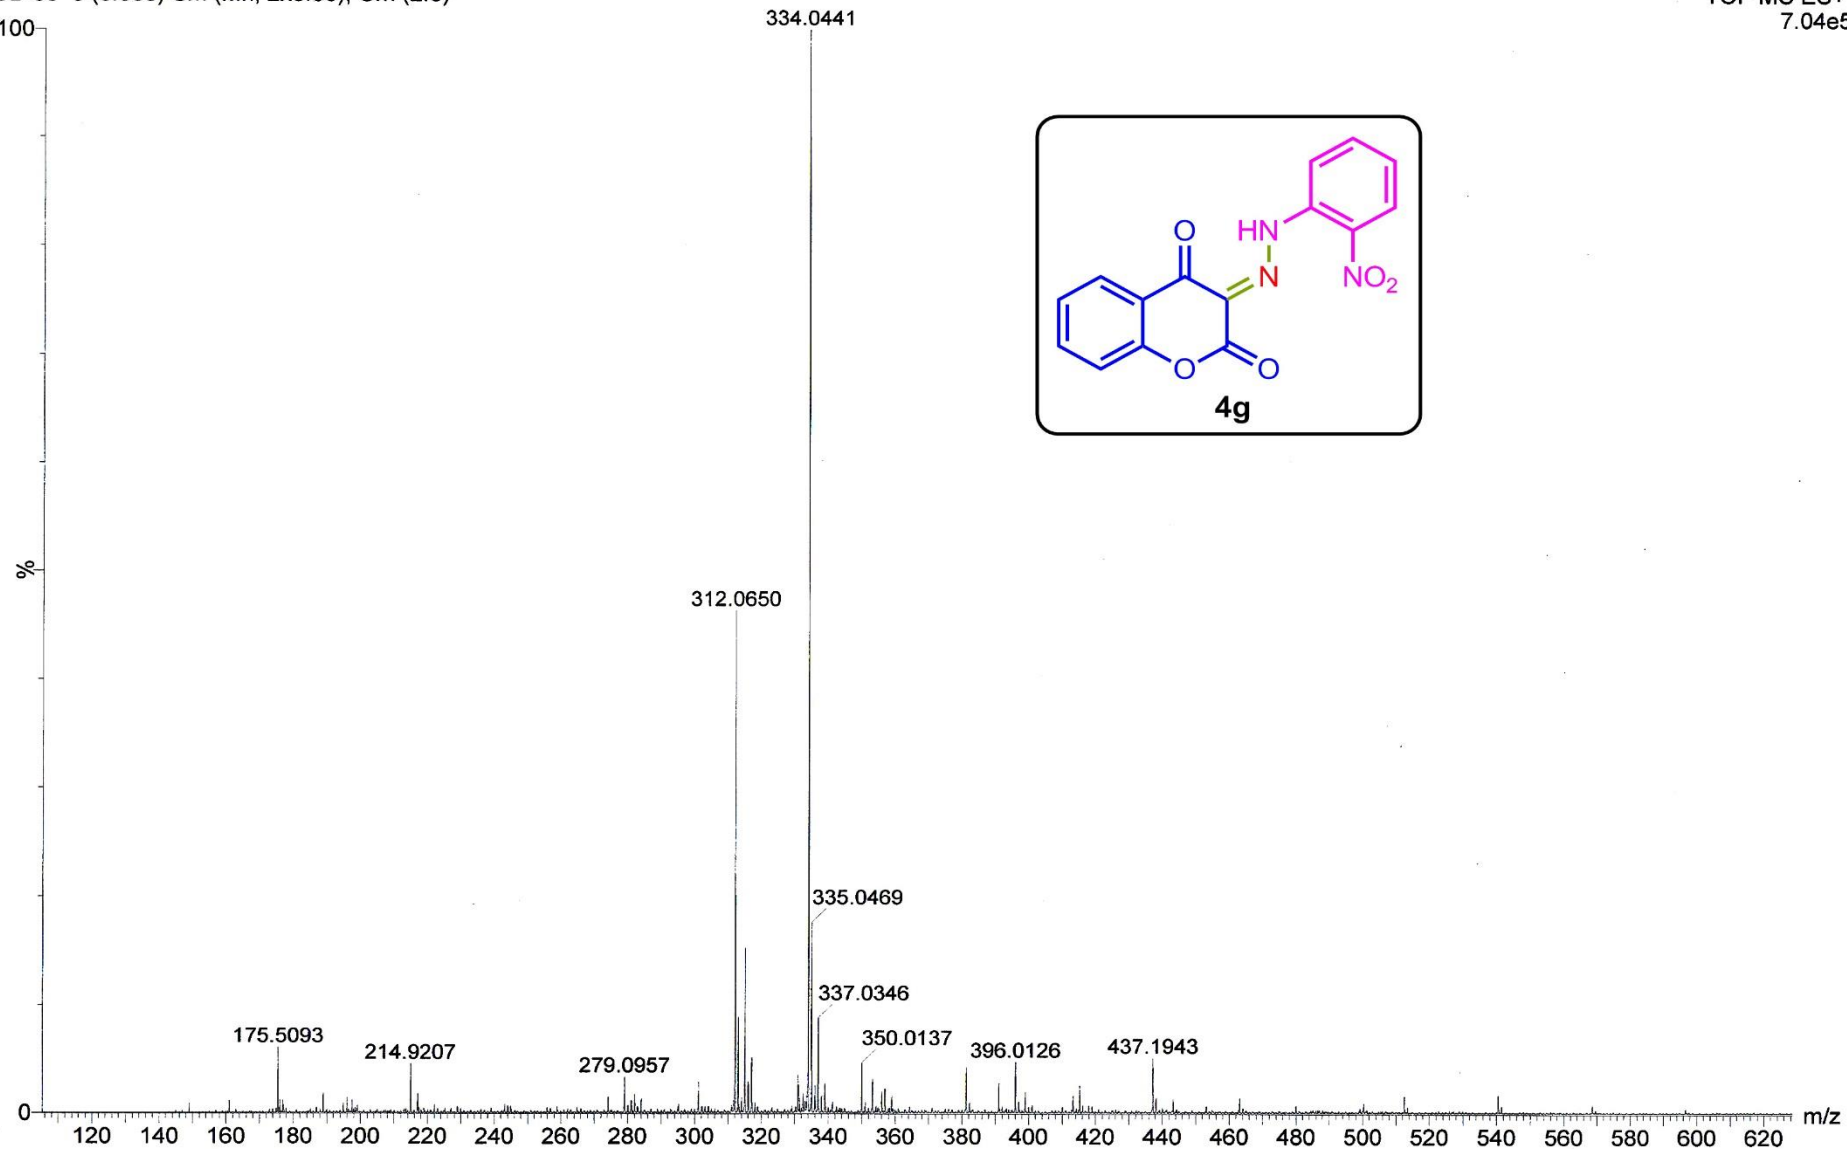

Figure S25. Mass spectra of (*E*)-3-(2-(2-nitrophenyl)hydrazono)chroman-2,4-dione (**4g**)

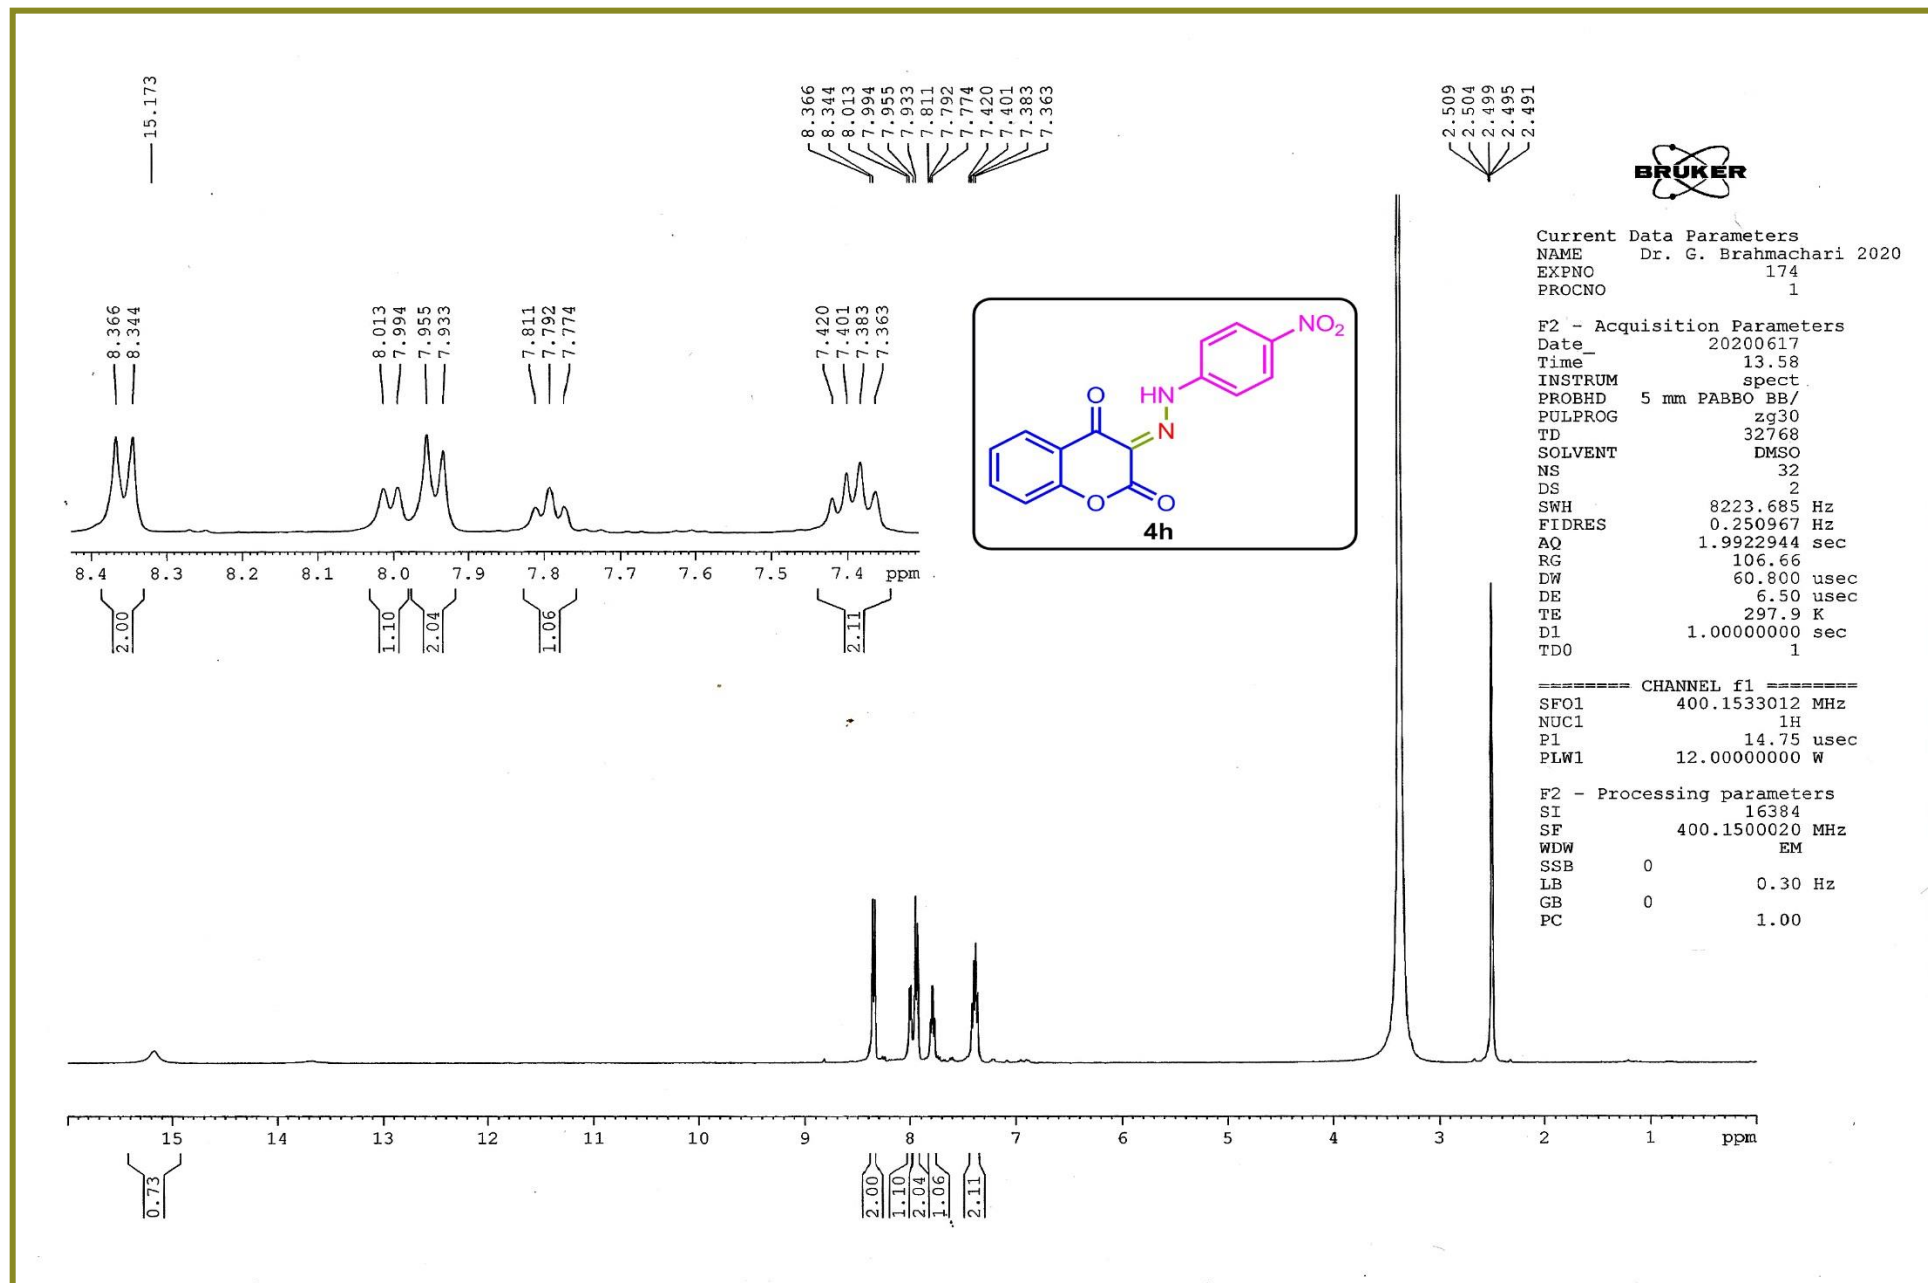

Figure S26. <sup>1</sup>H-NMR spectrum of (*E*)-3-(2-(4-nitrophenyl)hydrazono)chroman-2,4-dione (**4h**)



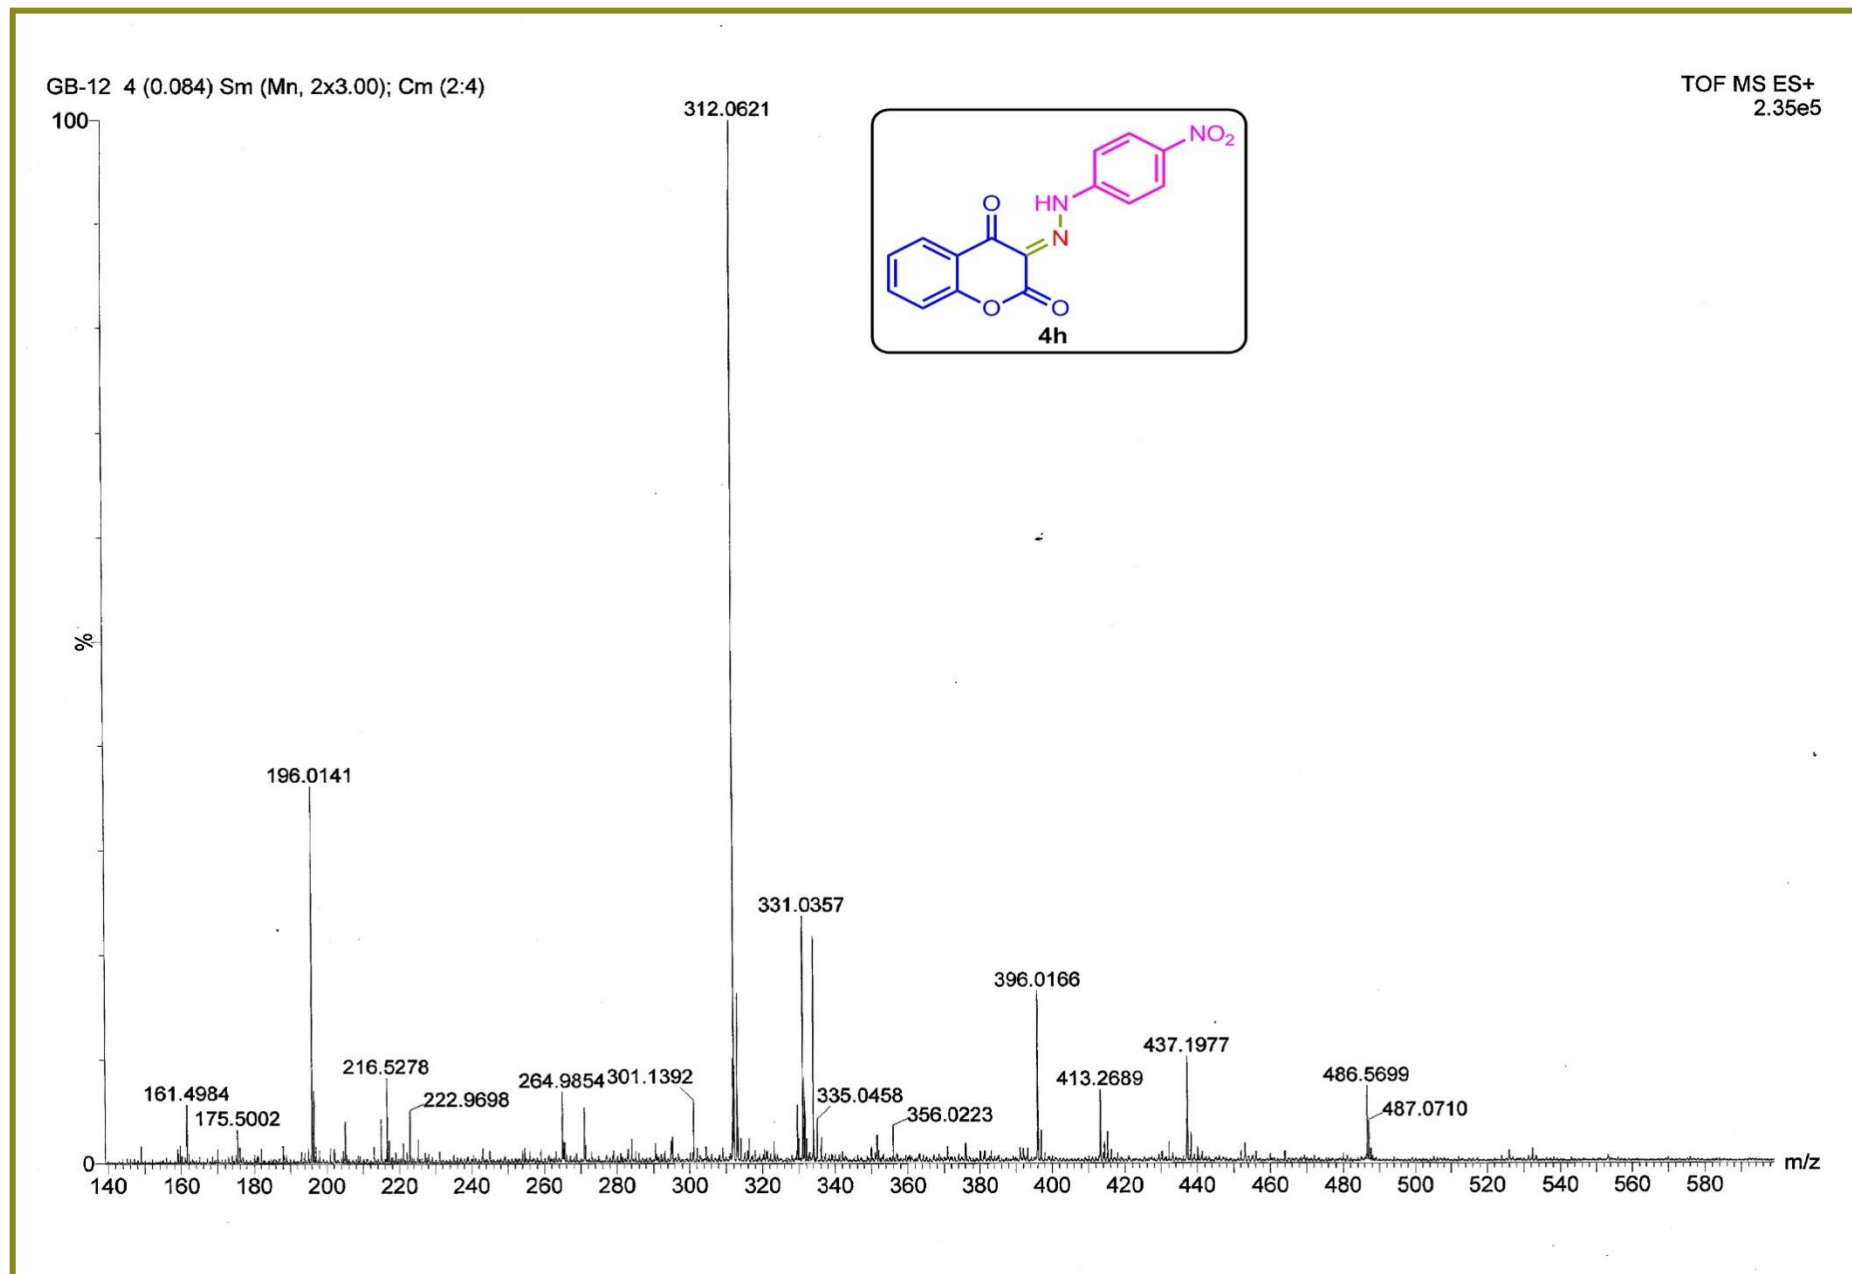

Figure S27. Mass spectra of (*E*)-3-(2-(4-nitrophenyl)hydrazono)chroman-2,4-dione (**4h**)

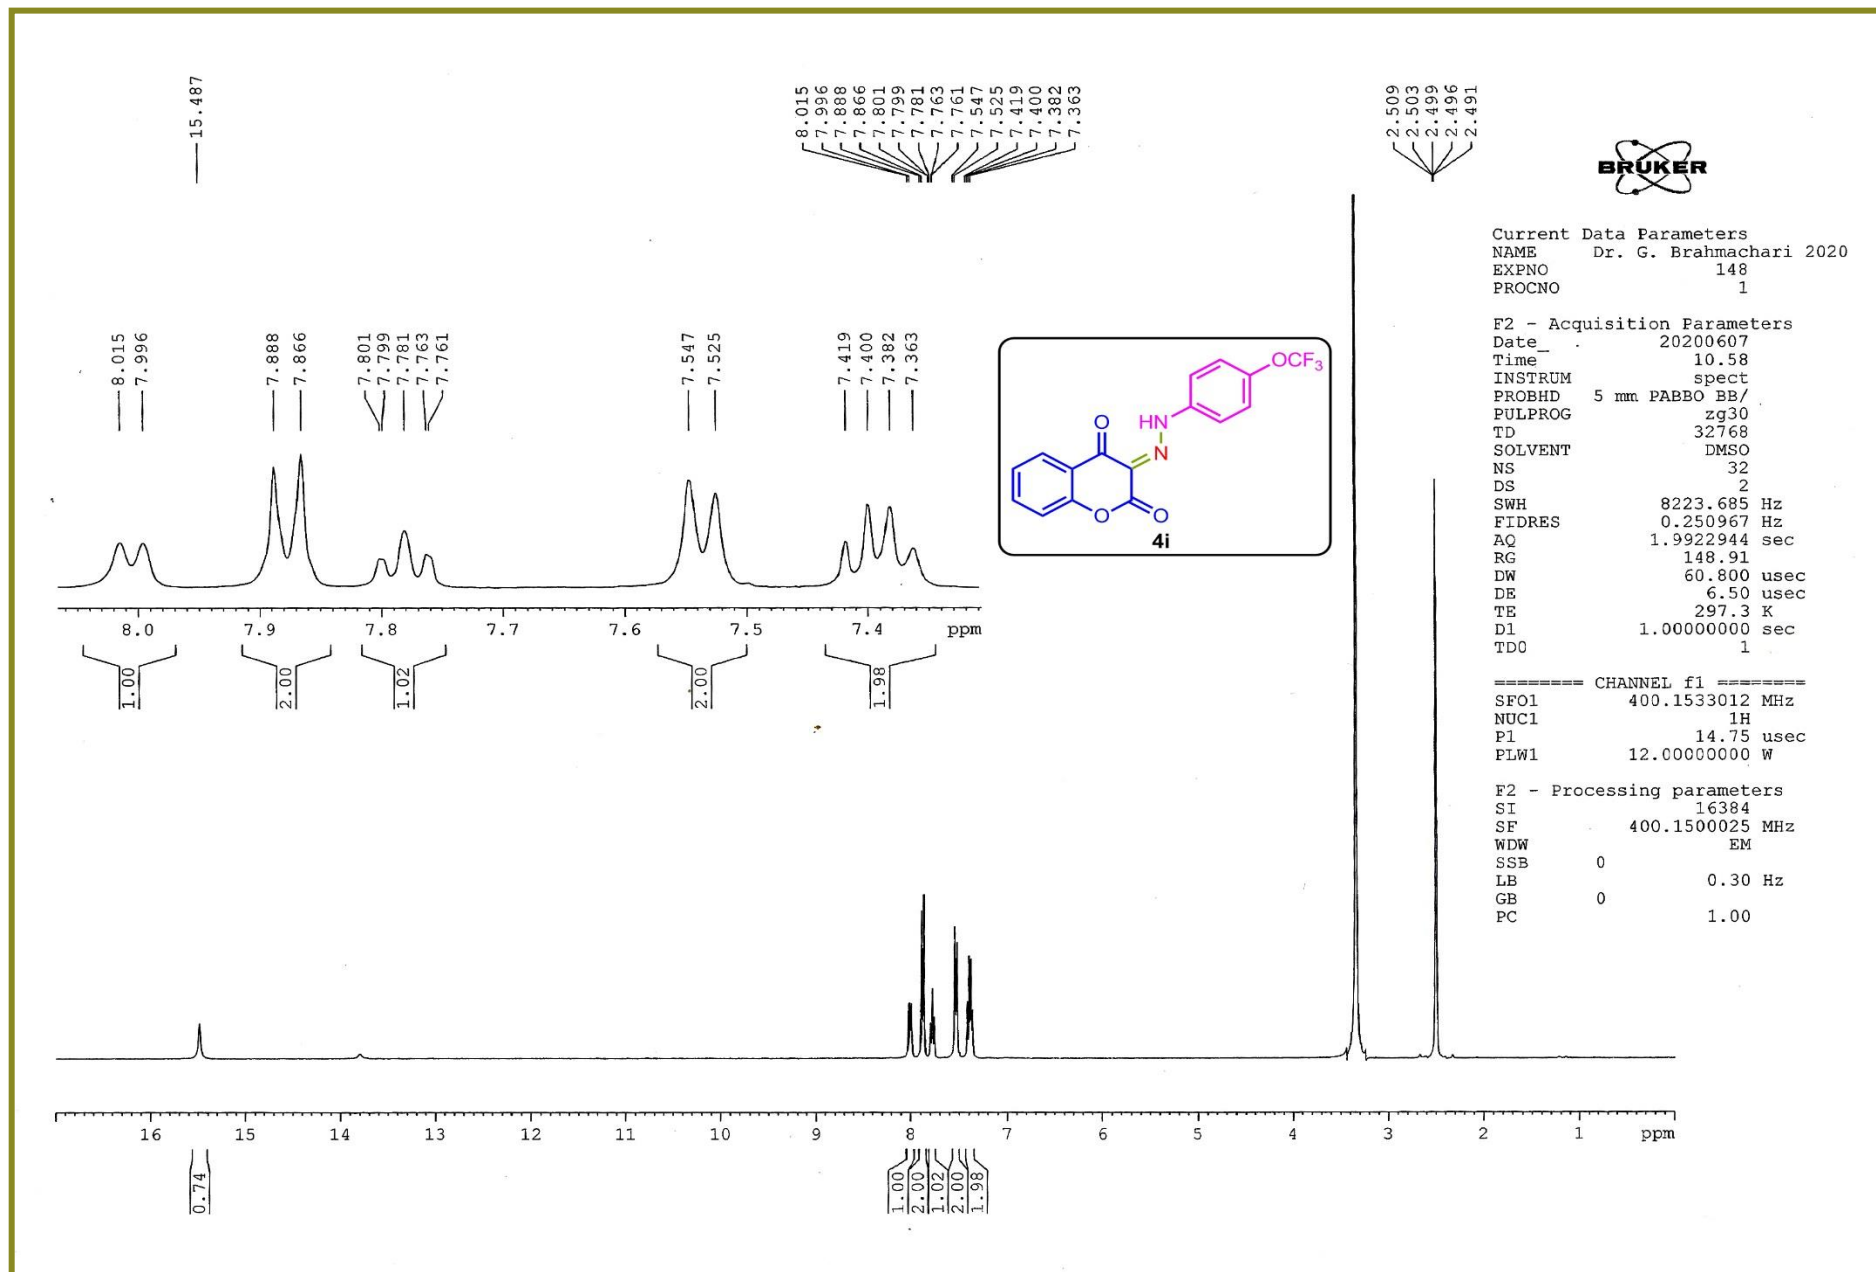

Figure S28. <sup>1</sup>H-NMR spectrum of (*E*)-3-(2-(4-(trifluoromethoxy)phenyl)hydrazono)chroman-2,4-dione (**4i**)

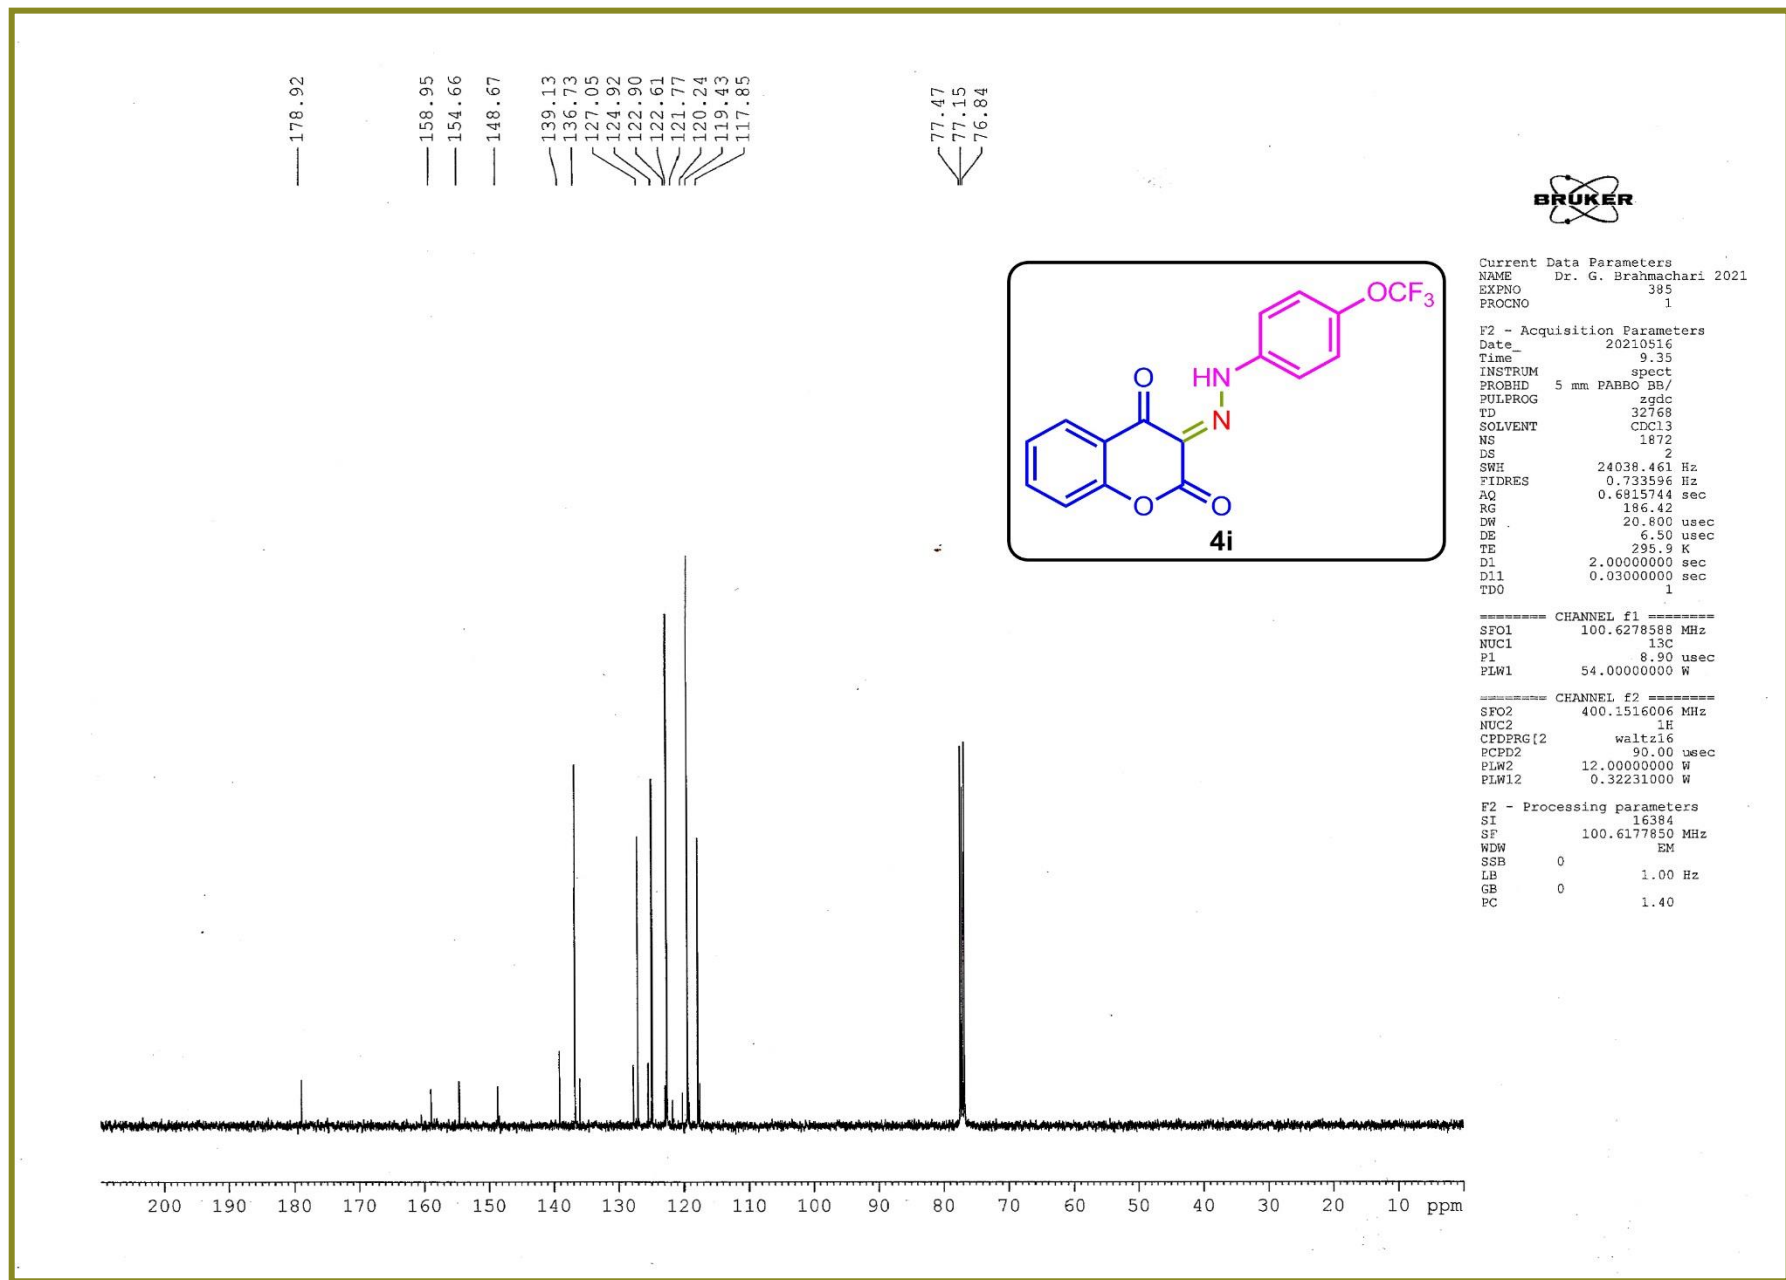

Figure S29. <sup>13</sup>C-NMR spectrum of (*E*)-3-(2-(4-(trifluoromethoxy)phenyl)hydrazono)chroman-2,4-dione (**4i**)

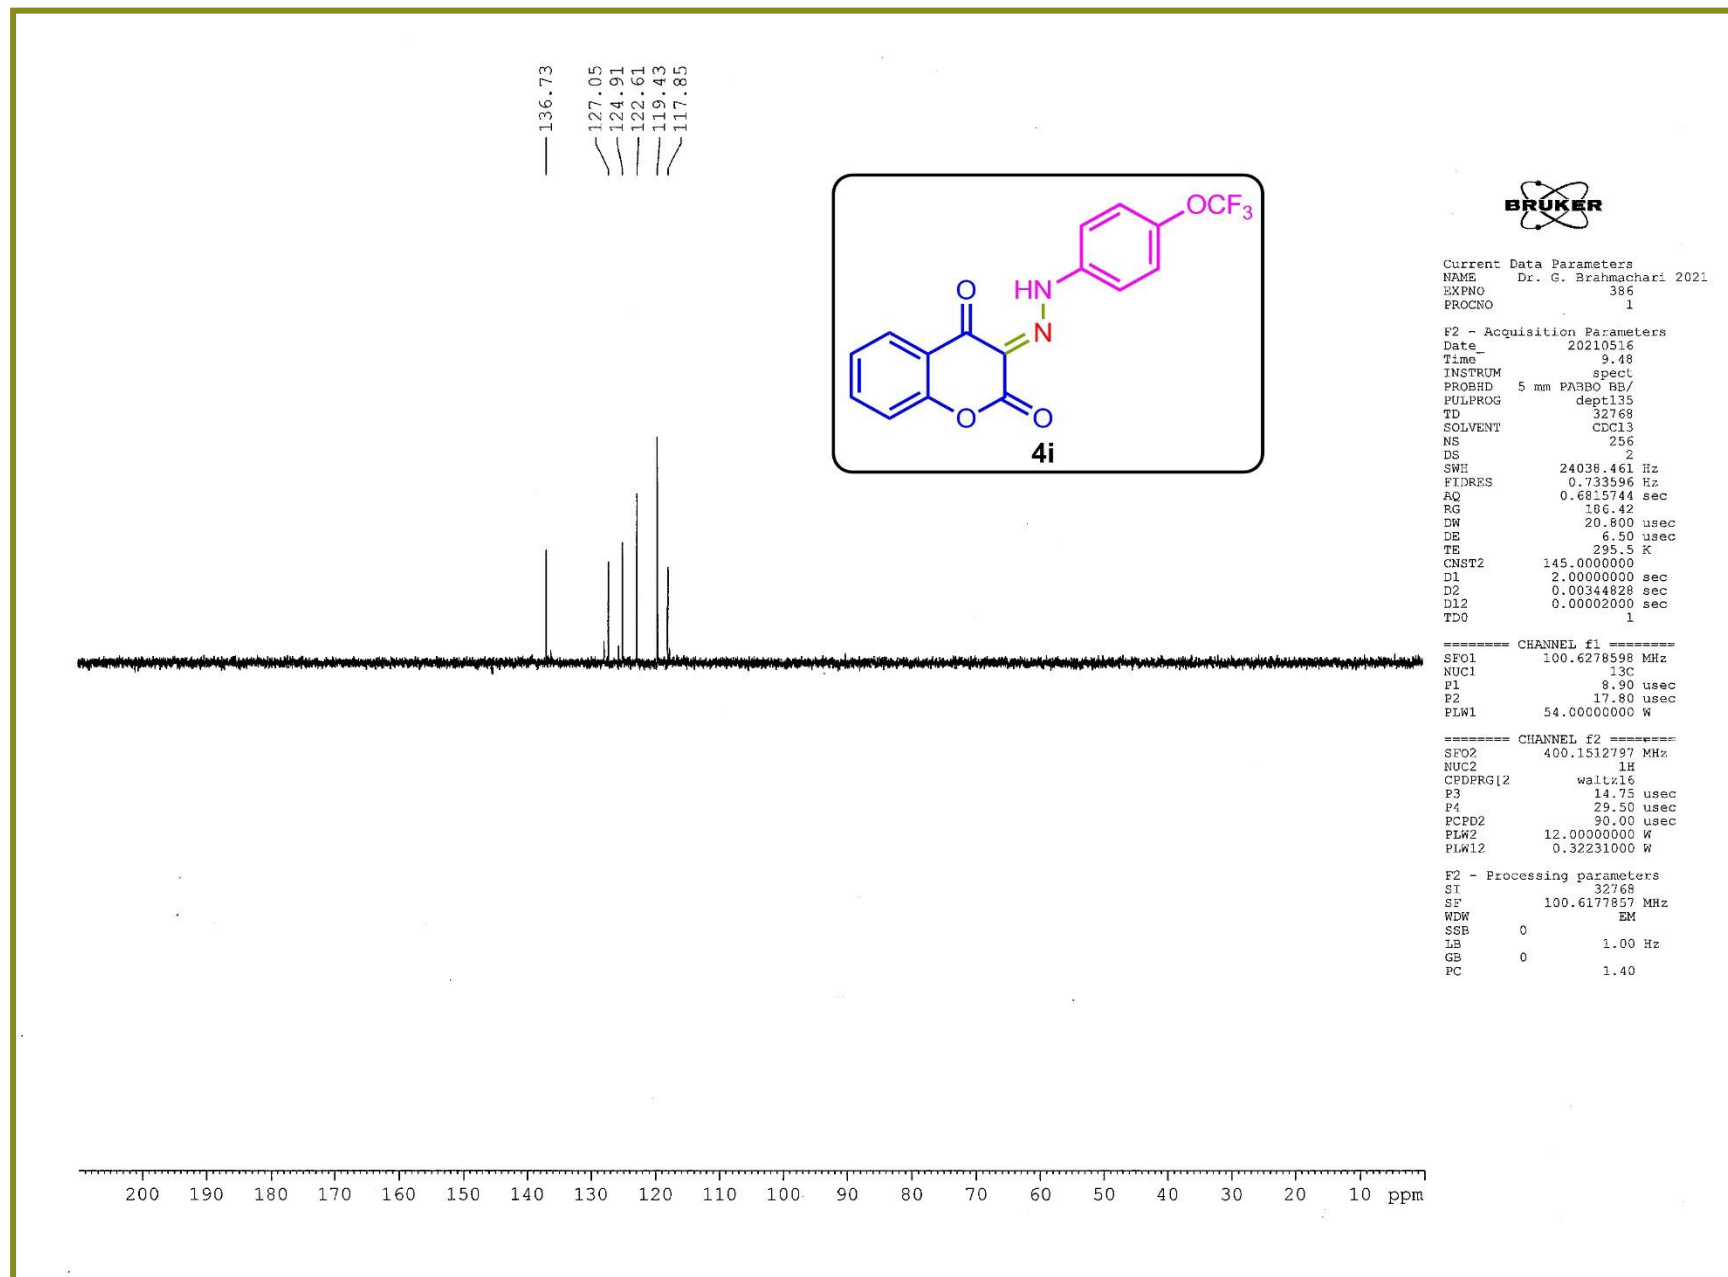

Figure S30. DEPT-135 NMR spectrum of (*E*)-3-(2-(4-(trifluoromethoxy)phenyl)hydrazono)chroman-2,4-dione (**4i**)

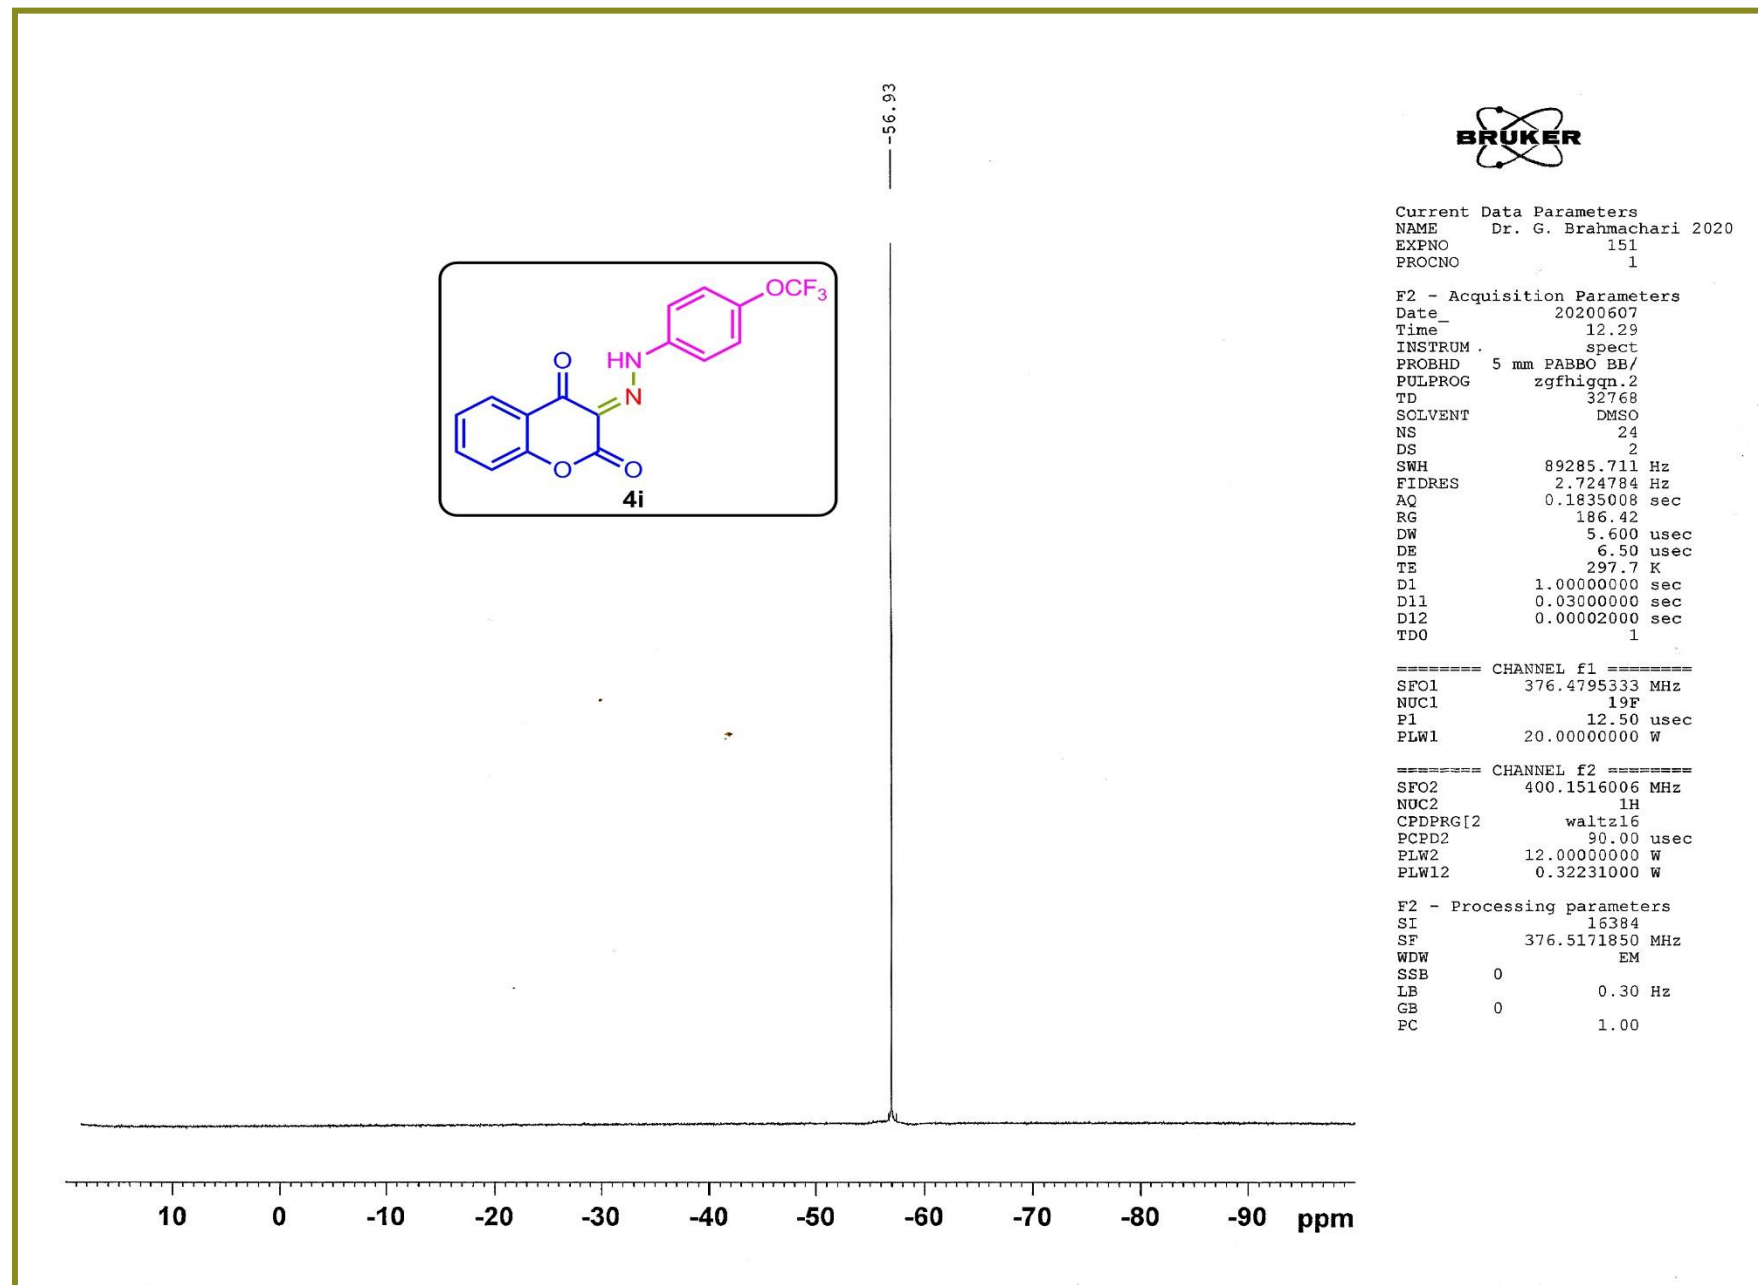

Figure S31. <sup>19</sup>F NMR spectrum of (*E*)-3-(2-(4-(trifluoromethoxy)phenyl)hydrazono)chroman-2,4-dione (**4i**)

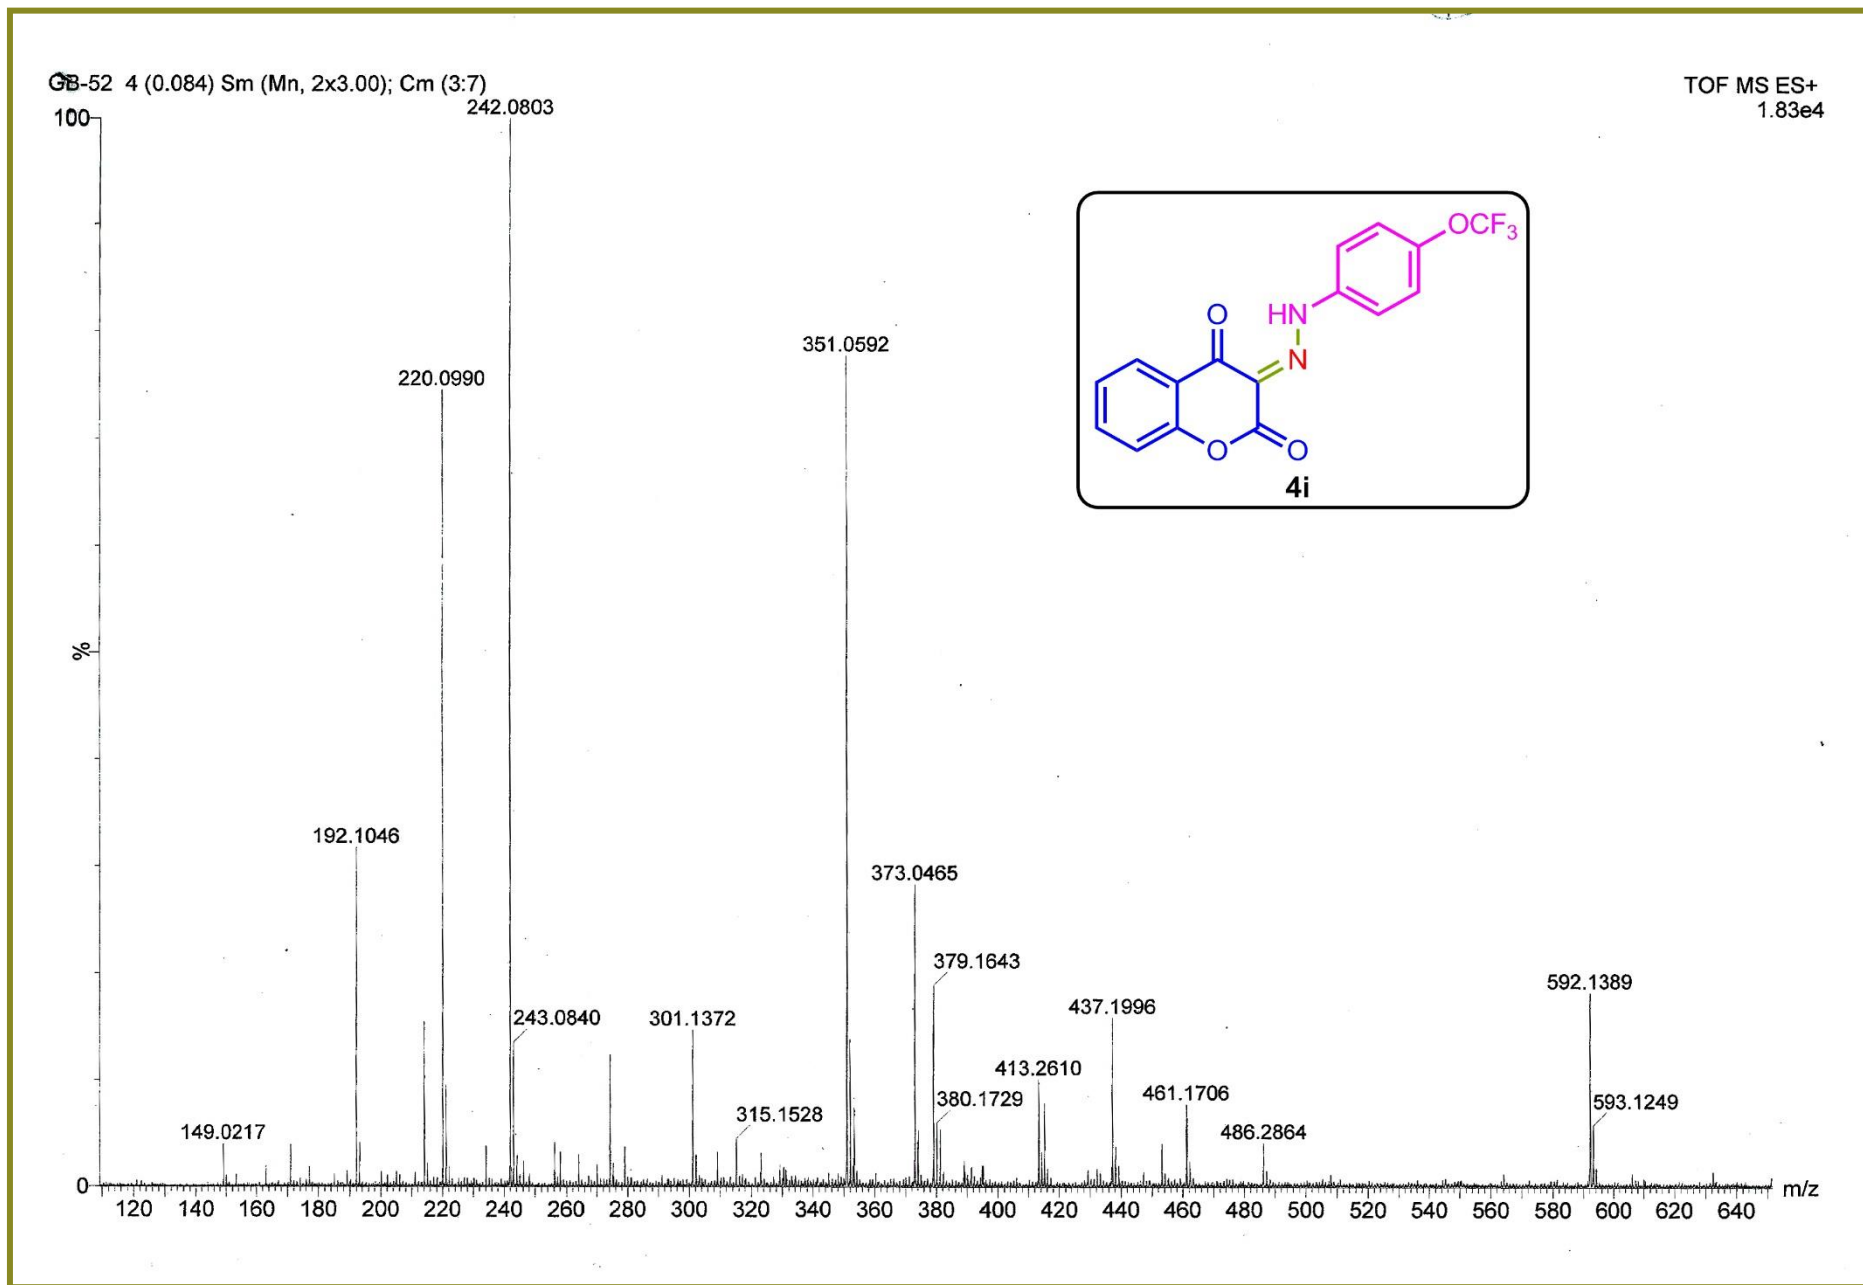

Figure S32. Mass spectra of (*E*)-3-(2-(4-(trifluoromethoxy)phenyl)hydrazono)chroman-2,4-dione (**4i**)

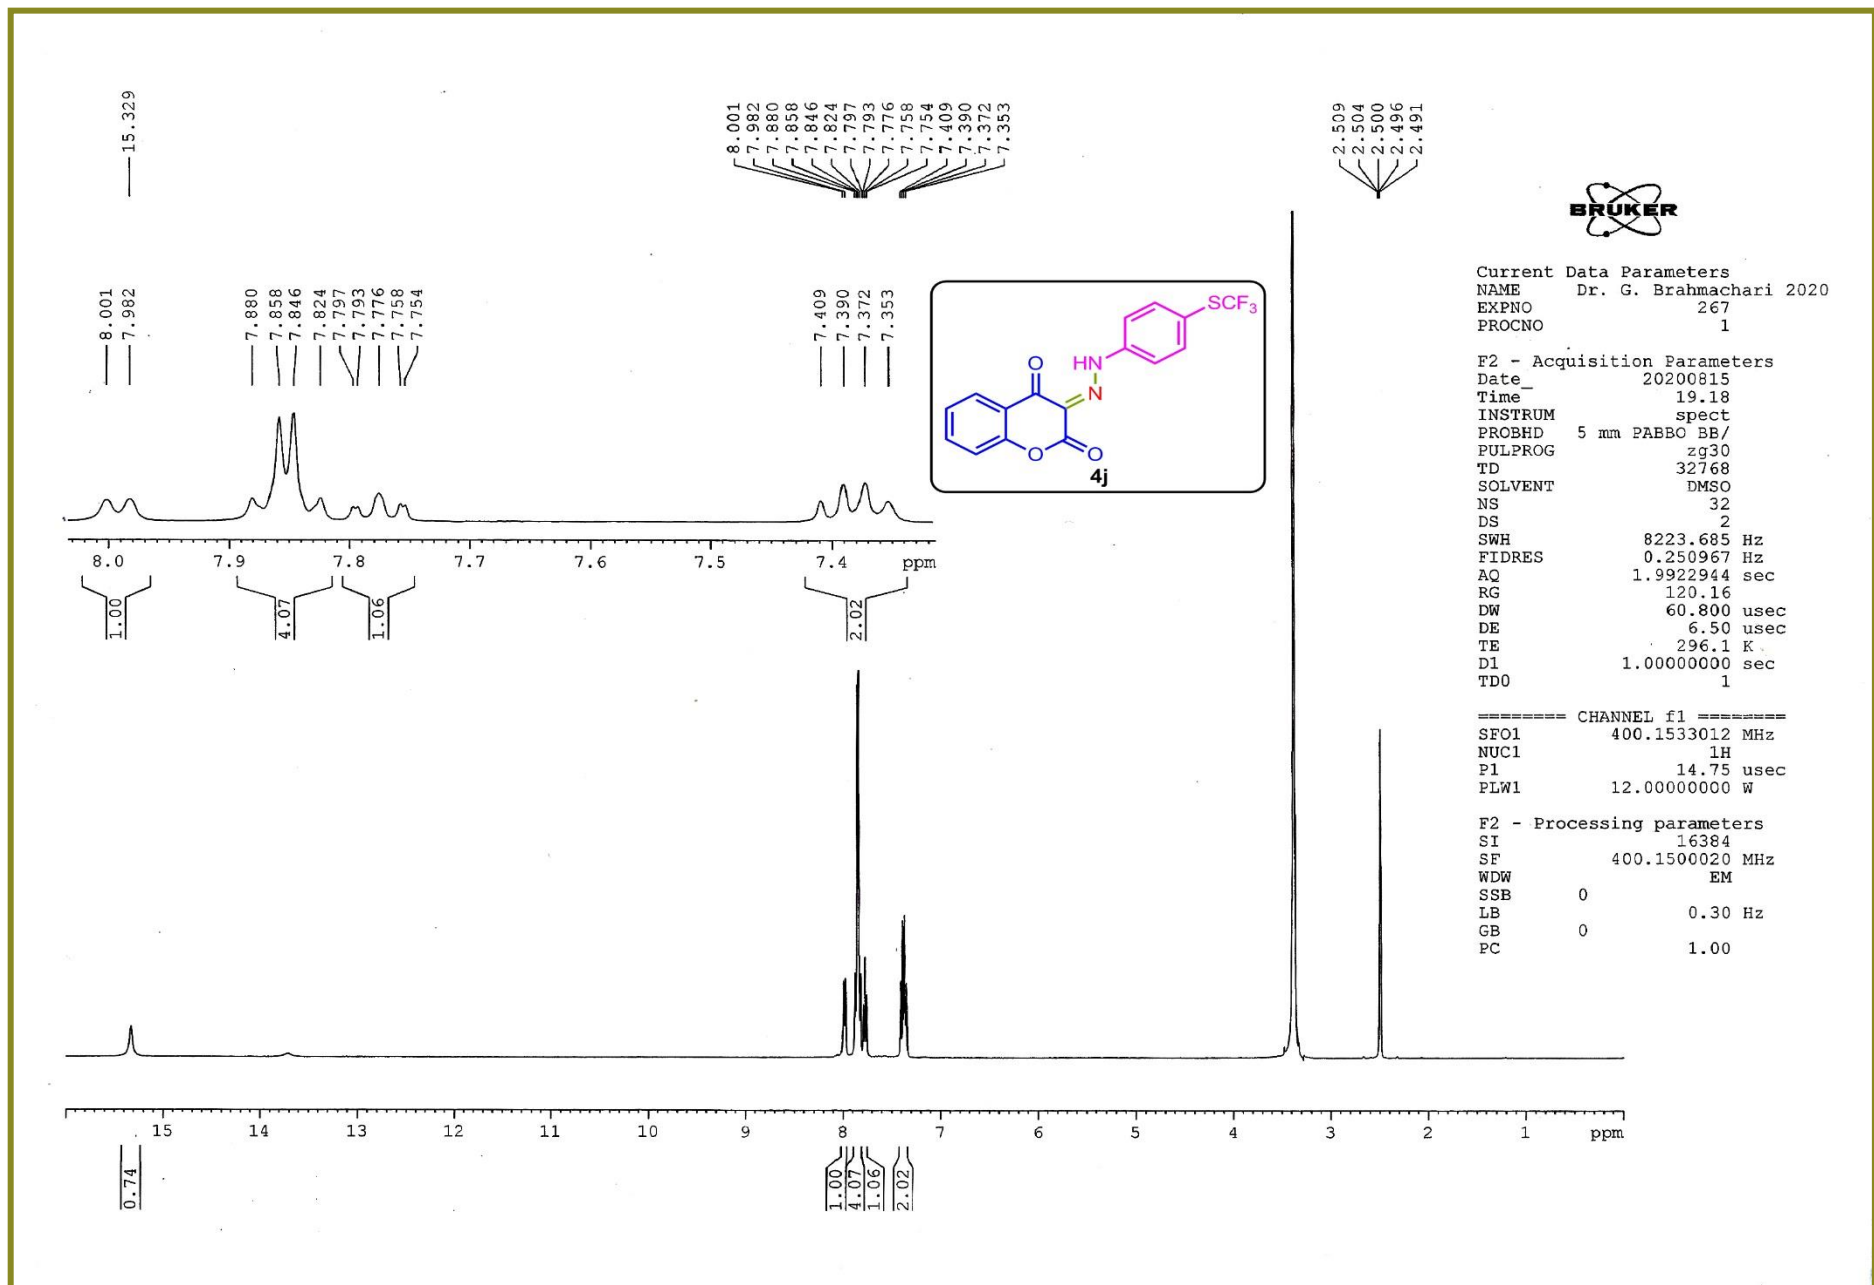

Figure S33. <sup>1</sup>H-NMR spectrum of (*E*)-3-(2-(4-((trifluoromethyl)thio)phenyl)hydrazono)chroman-2,4-dione (**4j**)

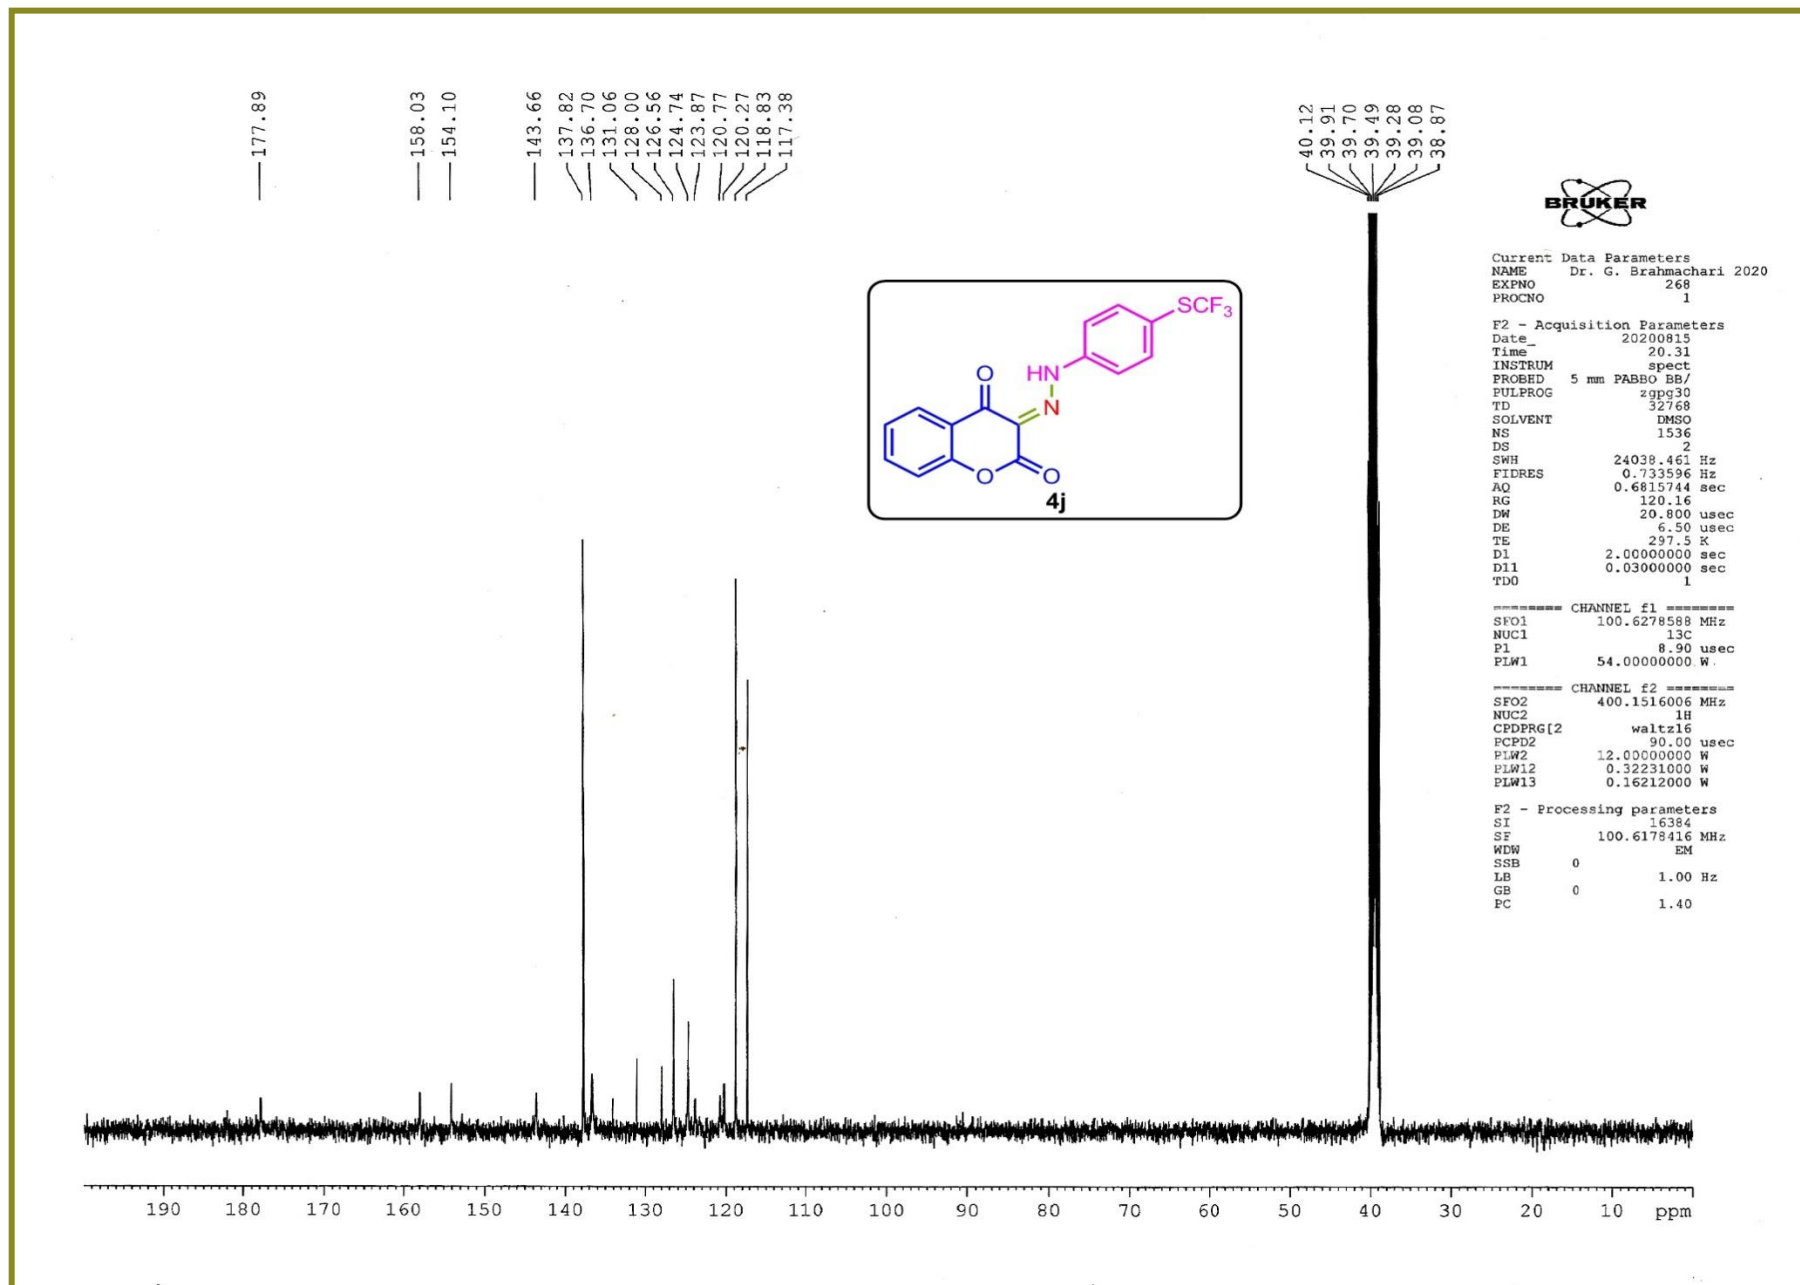

Figure S34. <sup>13</sup>C-NMR spectrum of (*E*)-3-(2-(4-((trifluoromethyl)thio)phenyl)hydrazono)chroman-2,4-dione (**4j**)



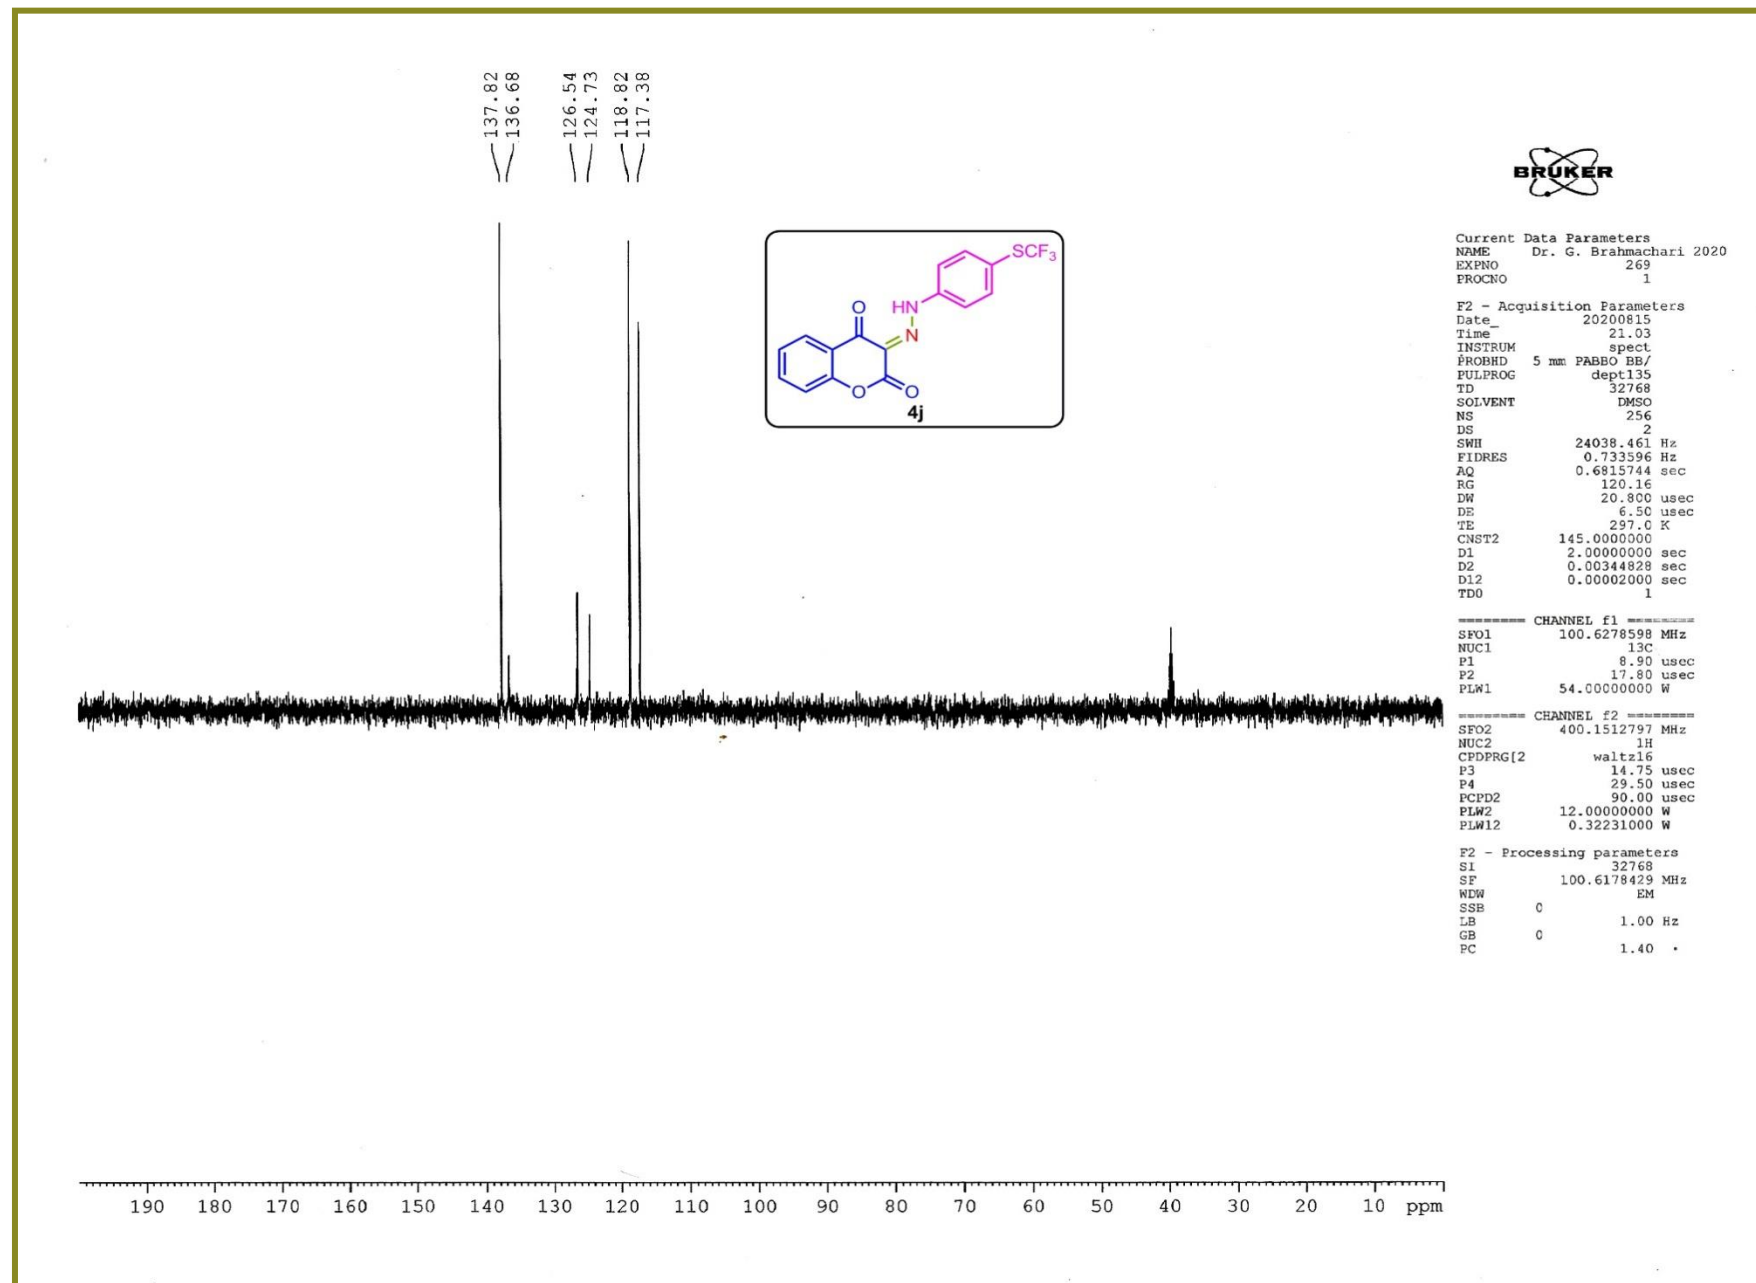

Figure S35. DEPT-135 NMR spectrum of (*E*)-3-(2-(4-((trifluoromethyl)thio)phenyl)hydrazono)chroman-2,4-dione (**4j**)

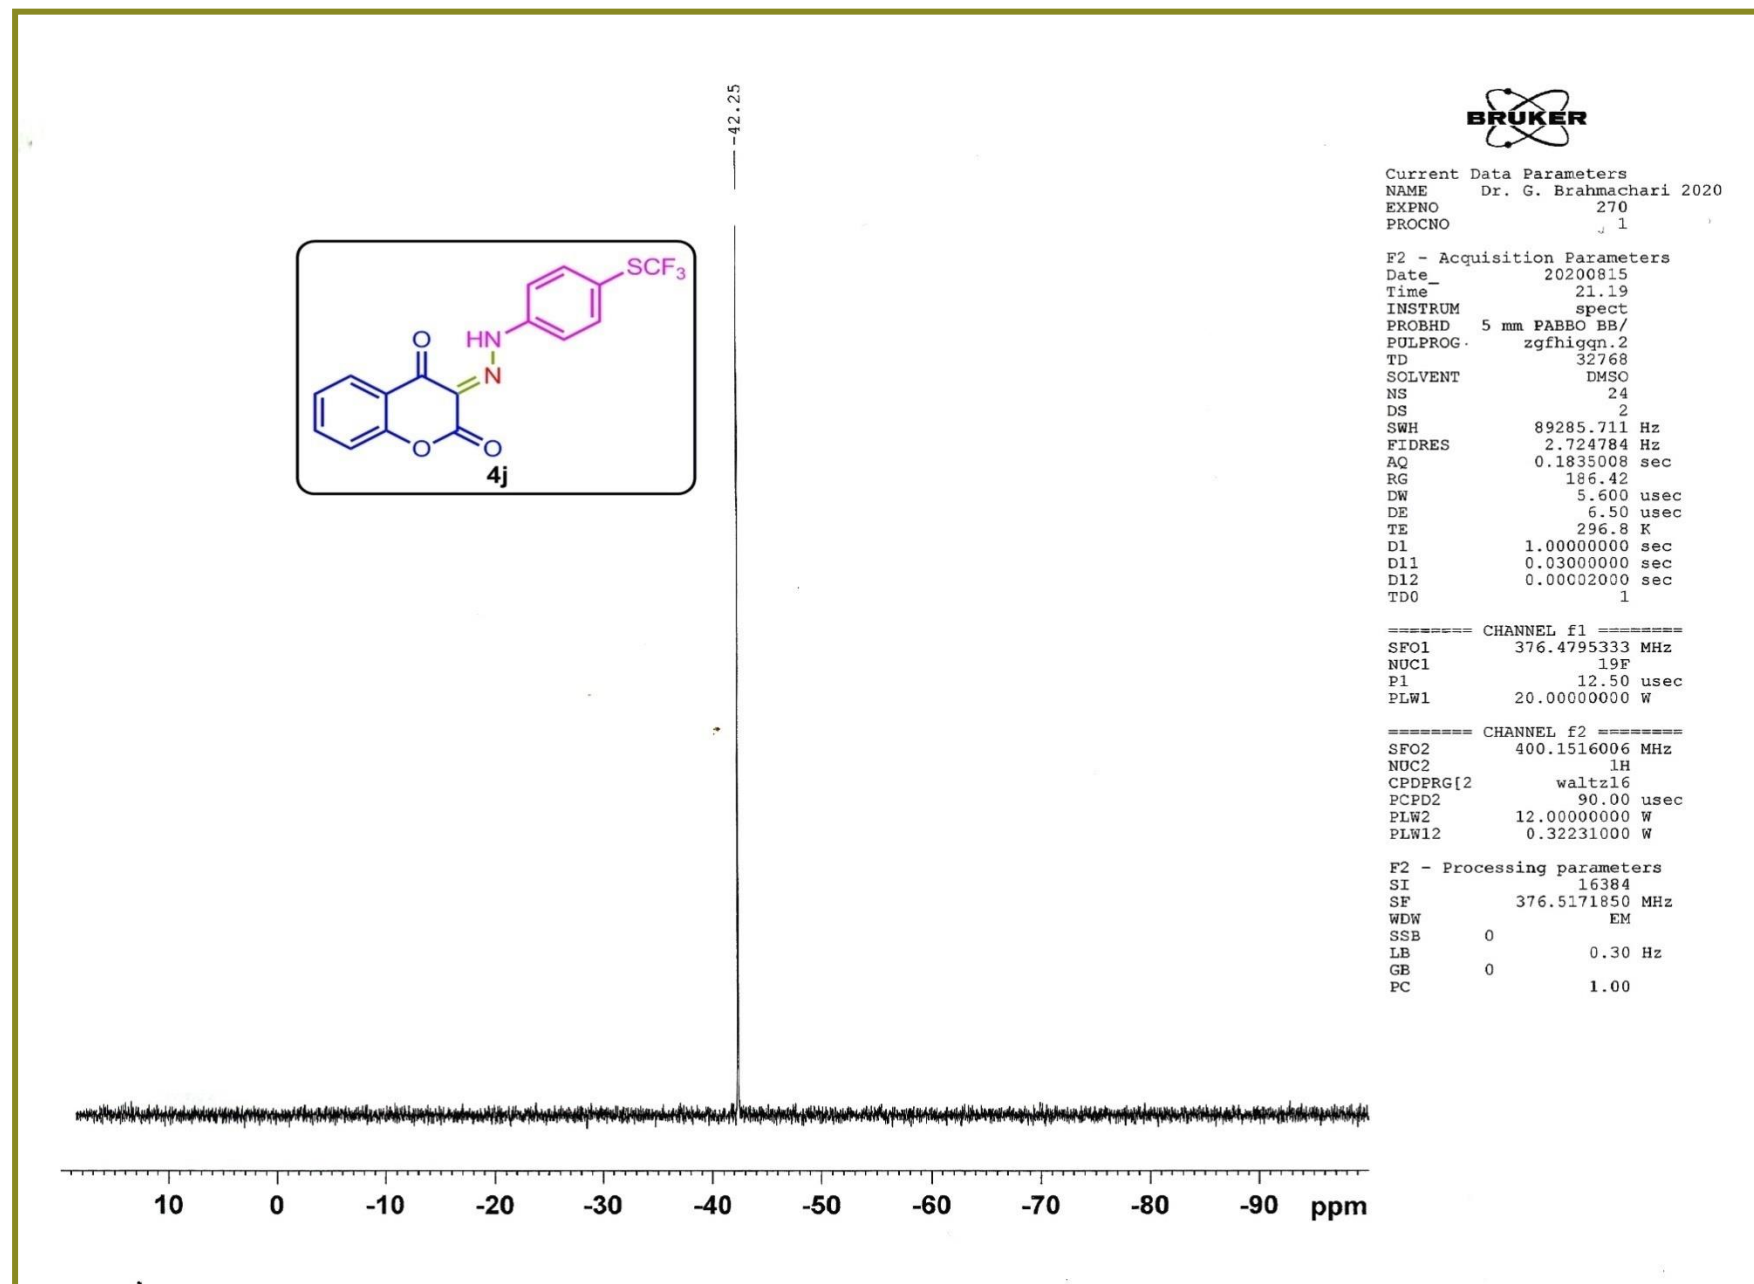

Figure S36.  $^{19}\text{F}$  NMR spectrum of (*E*)-3-(2-(4-((trifluoromethyl)thio)phenyl)hydrazono)chroman-2,4-dione (**4j**)

GB-47 6 (0.118) Sm (Mn, 2x3.00); Cm (2:6)

TOF MS ES+  
5.79e4

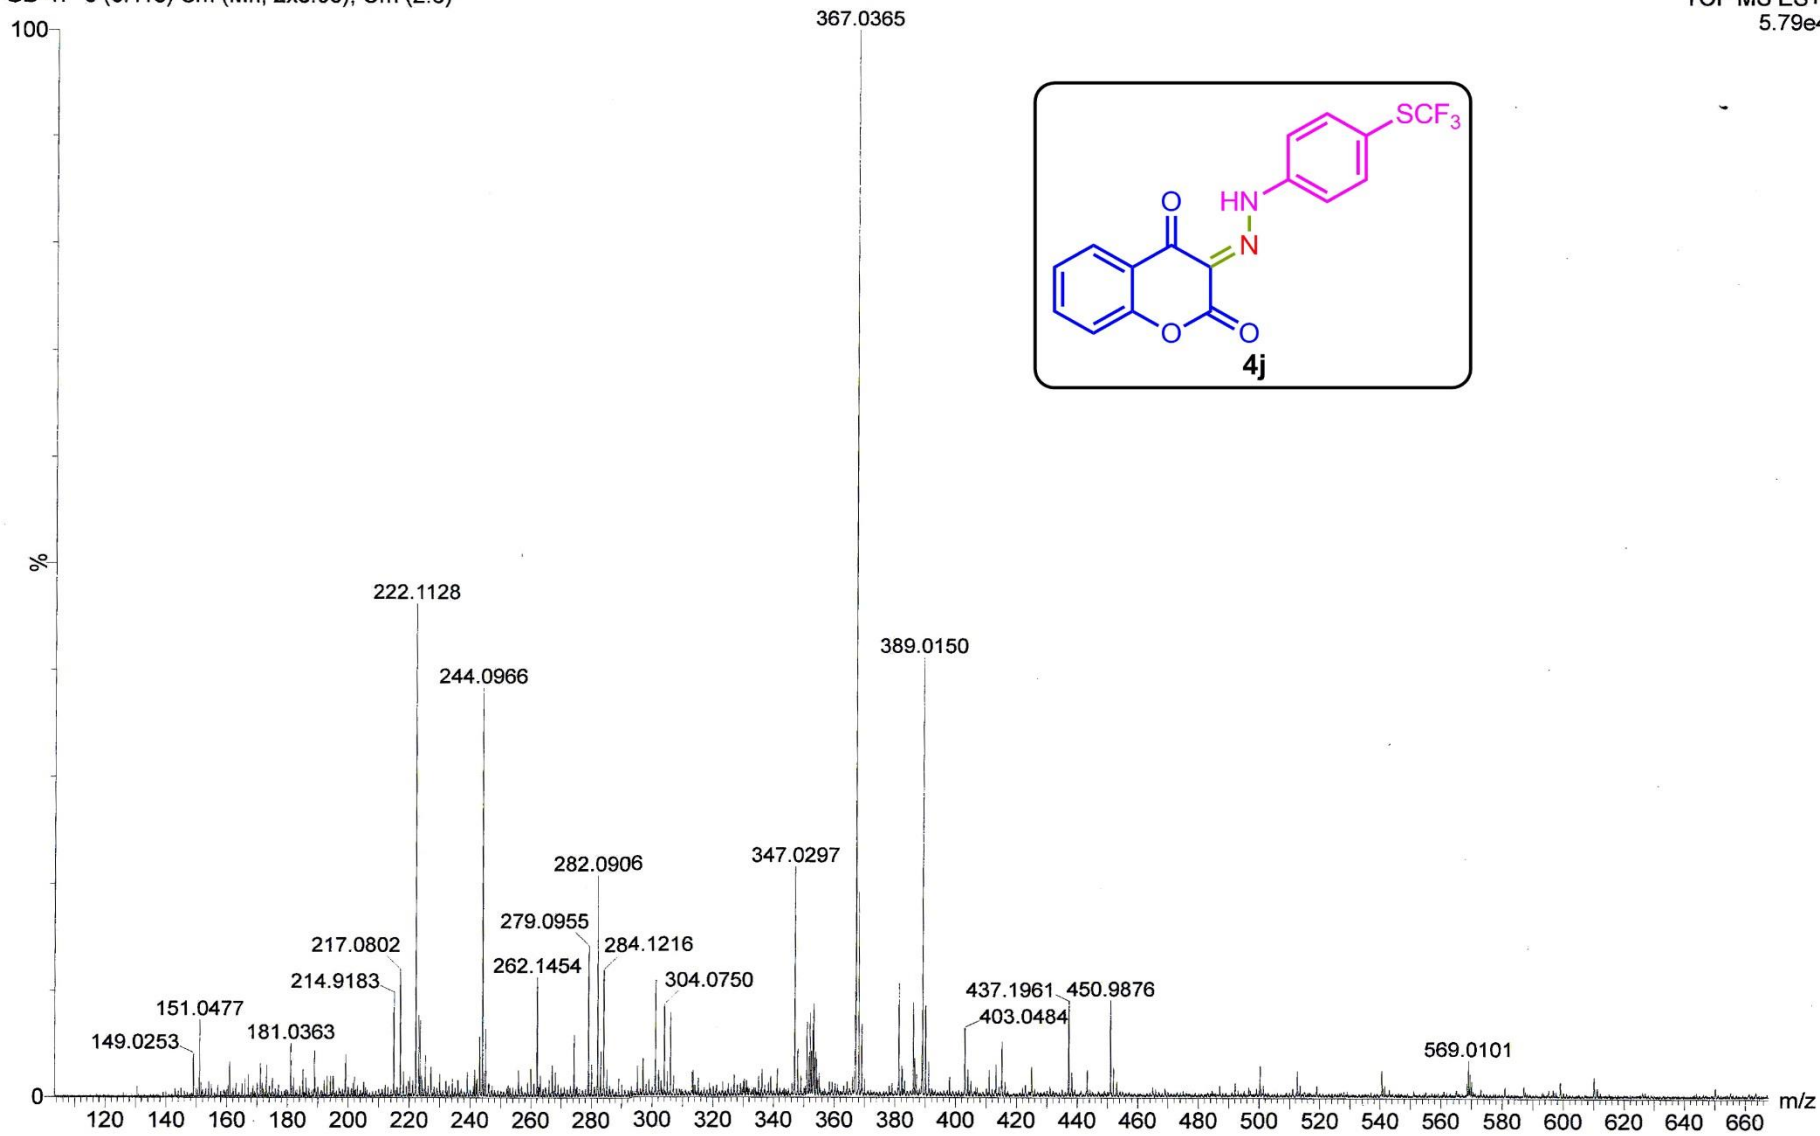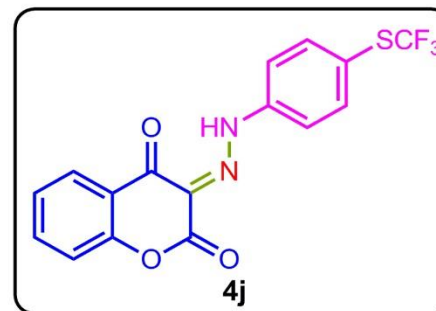

Figure S37. Mass spectra of (*E*)-3-(2-(4-((trifluoromethyl)thio)phenyl)hydrazono)chroman-2,4-dione (**4j**)

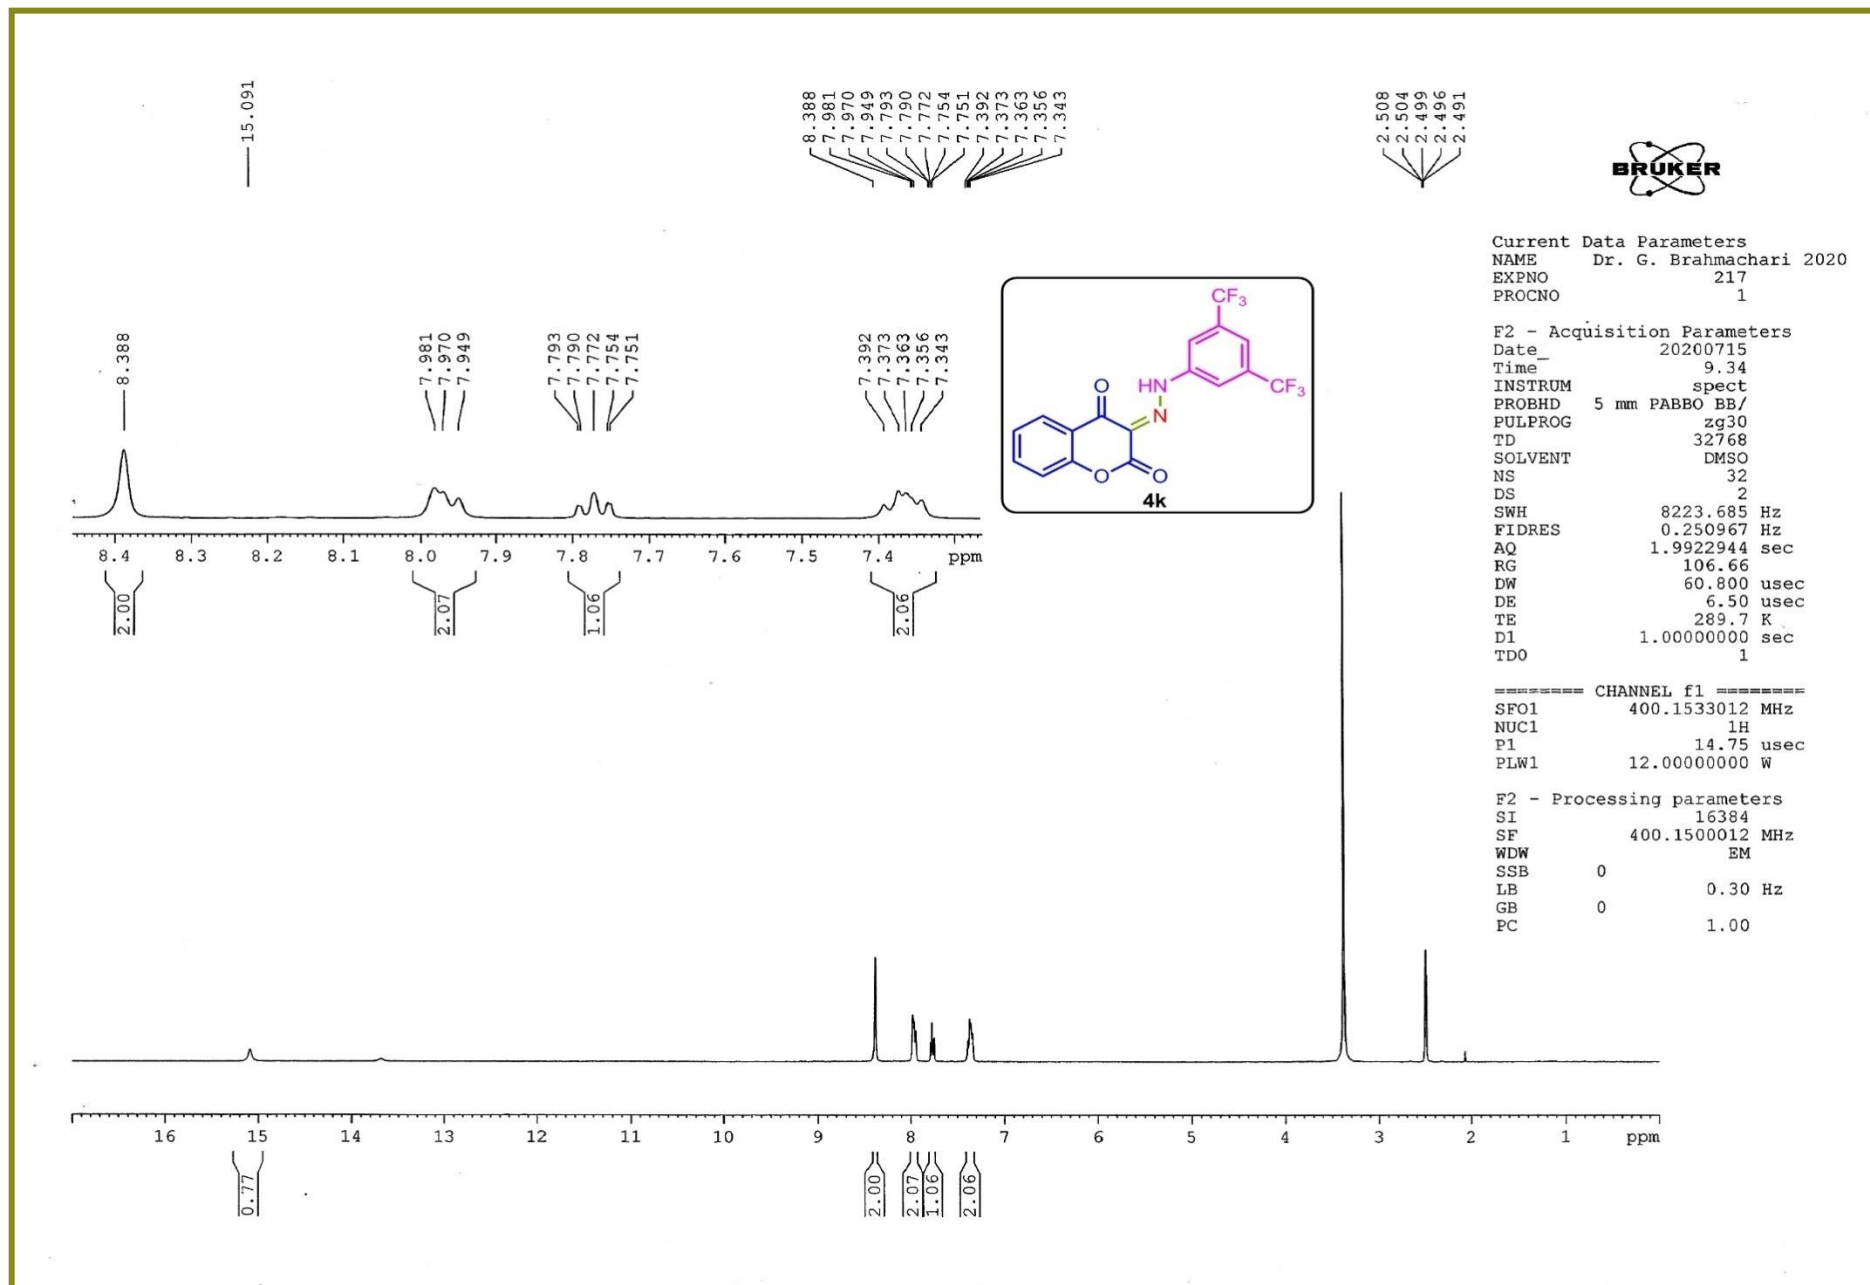

Figure S38. <sup>1</sup>H-NMR spectrum of (*E*)-3-(2-(3,5-bis(trifluoromethyl)phenyl)hydrazono)chroman-2,4-dione (**4k**)

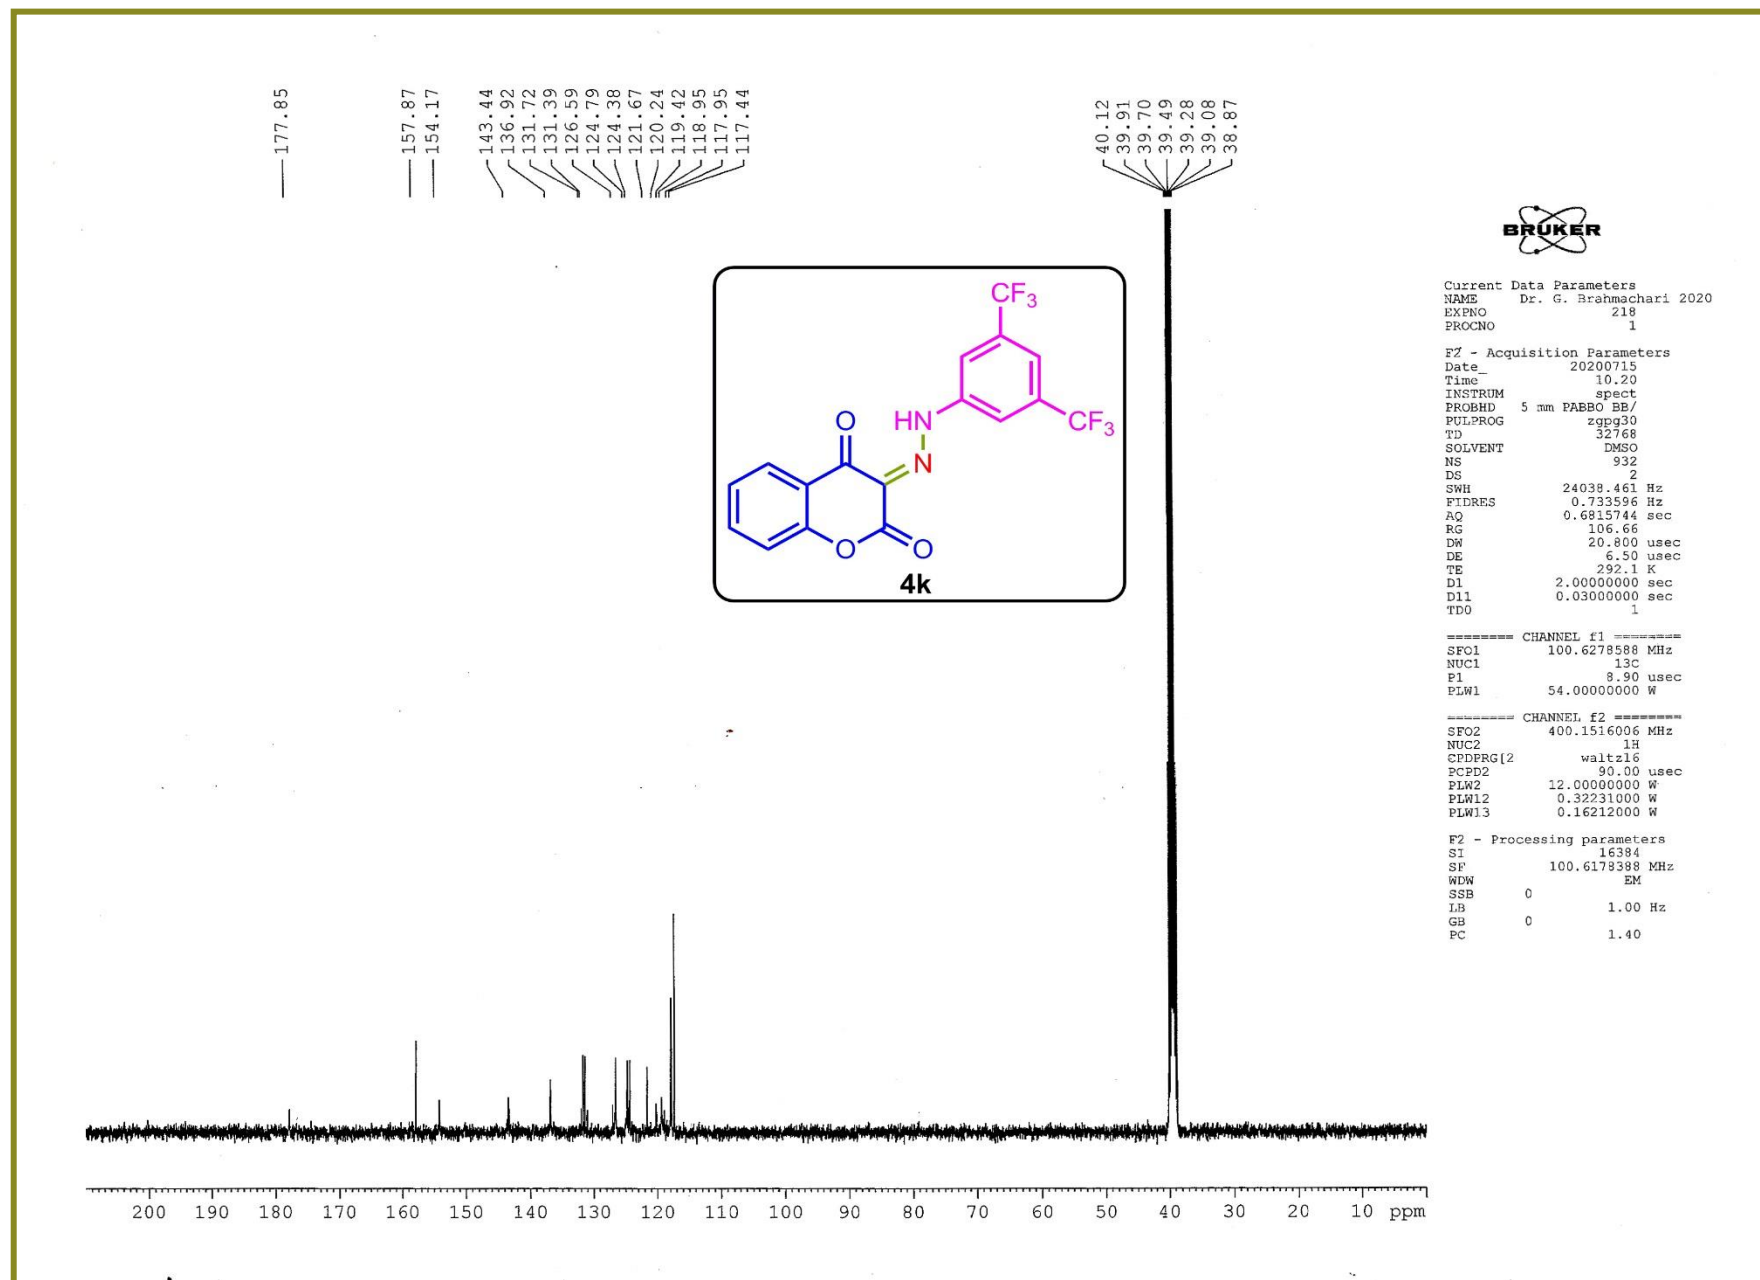

Figure S39. <sup>13</sup>C-NMR spectrum of (*E*)-3-(2-(3,5-bis(trifluoromethyl)phenyl)hydrazono)chroman-2,4-dione (**4k**)

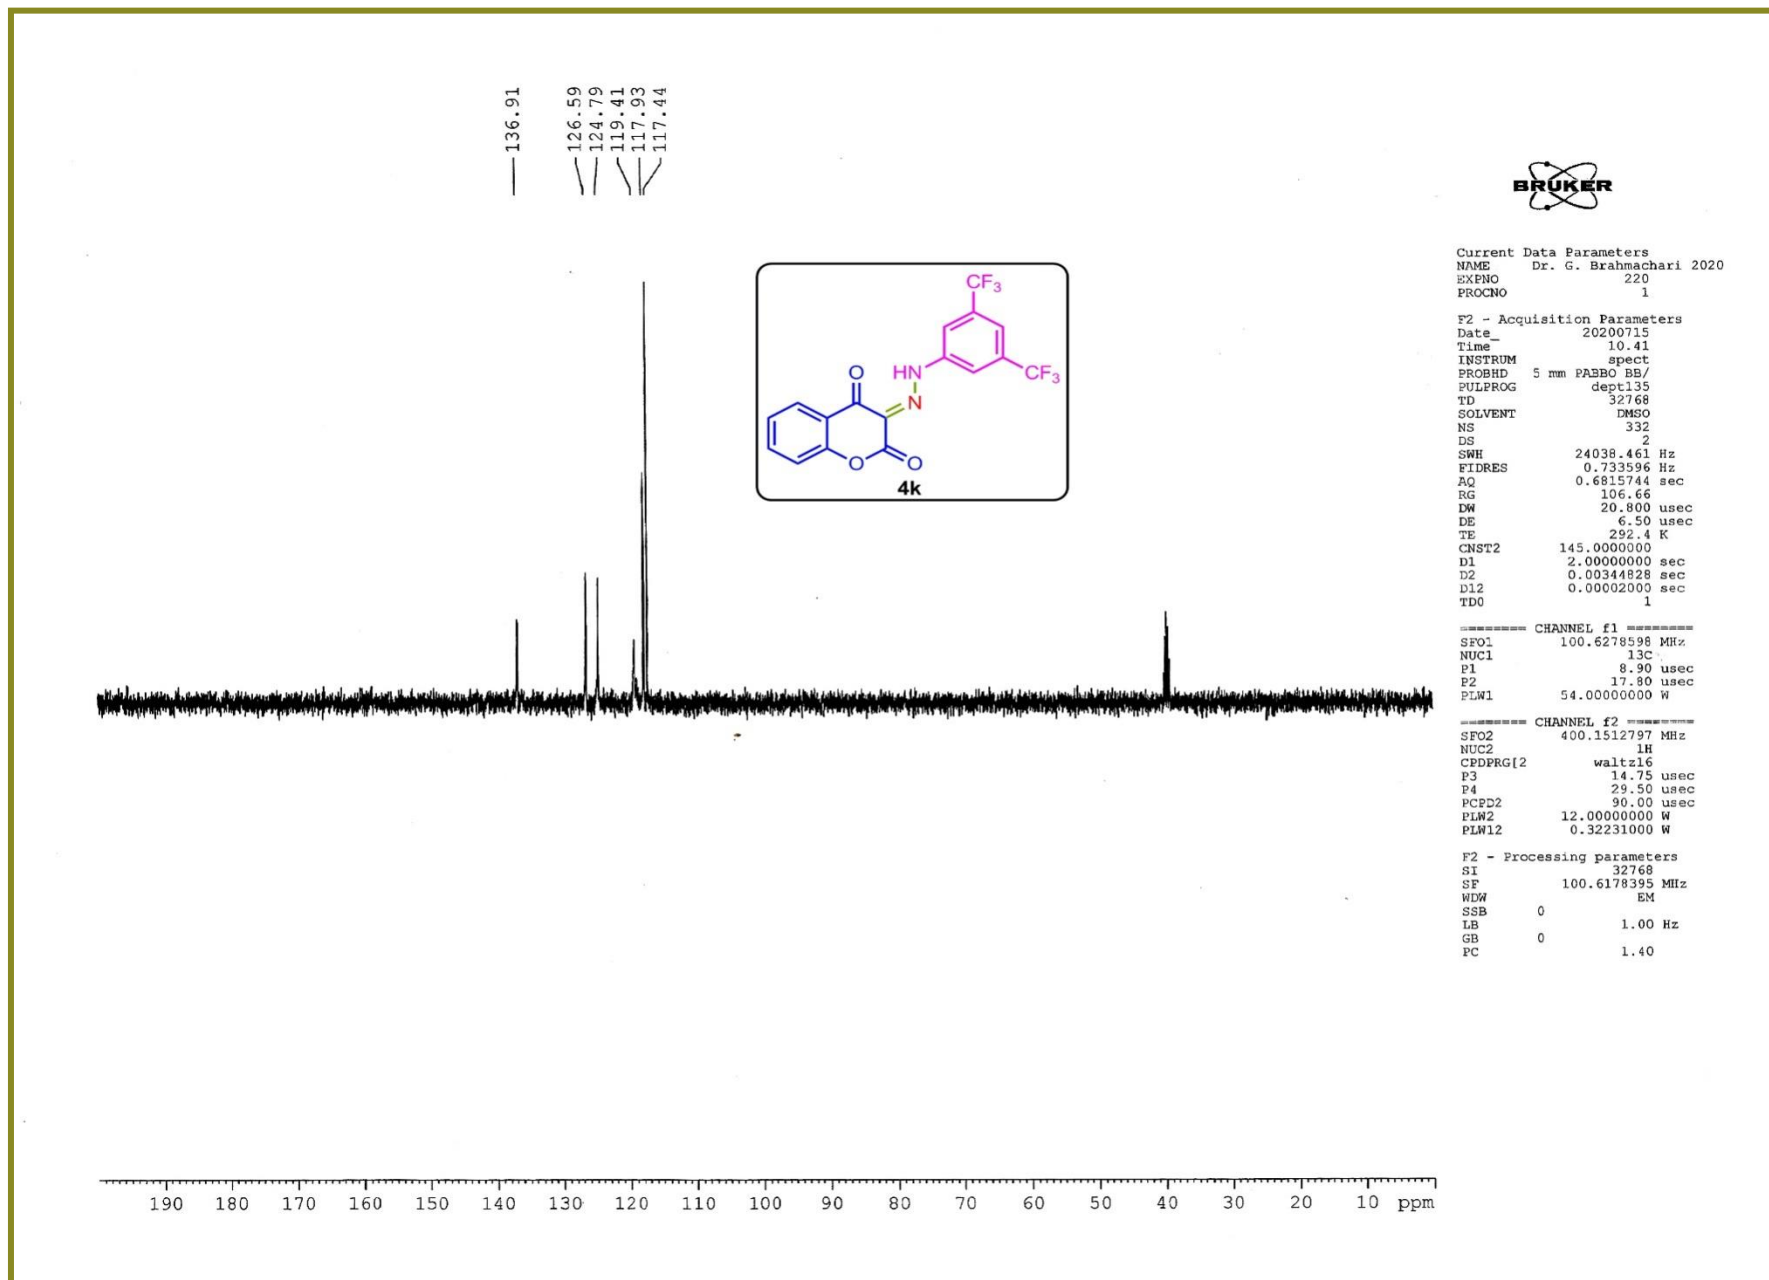

Figure S40. DEPT-135 NMR spectrum of (*E*)-3-(2-(3,5-bis(trifluoromethyl)phenyl)hydrazono)chroman-2,4-dione (**4k**)

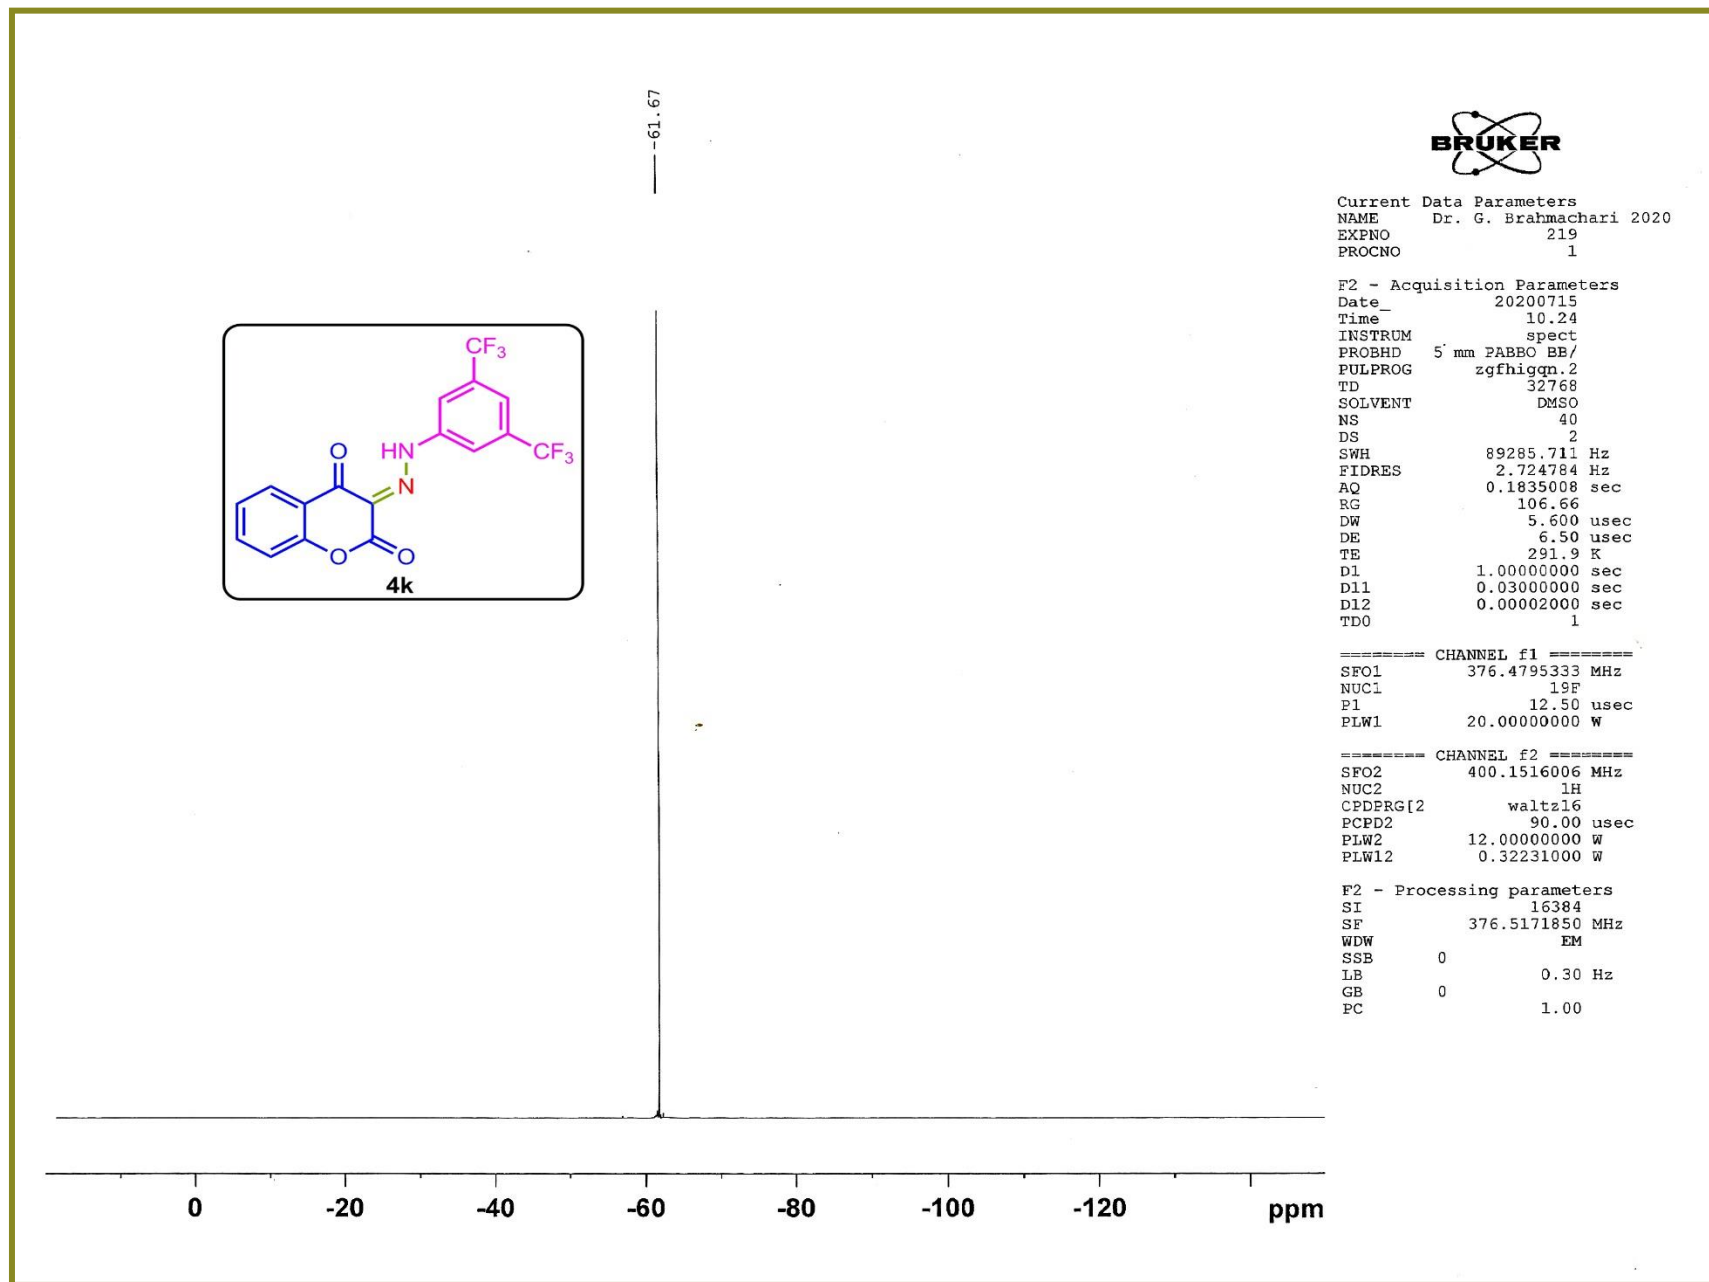

Figure S41. <sup>19</sup>F NMR spectrum of (*E*)-3-(2-(3,5-bis(trifluoromethyl)phenyl)hydrazono)chroman-2,4-dione (**4k**)

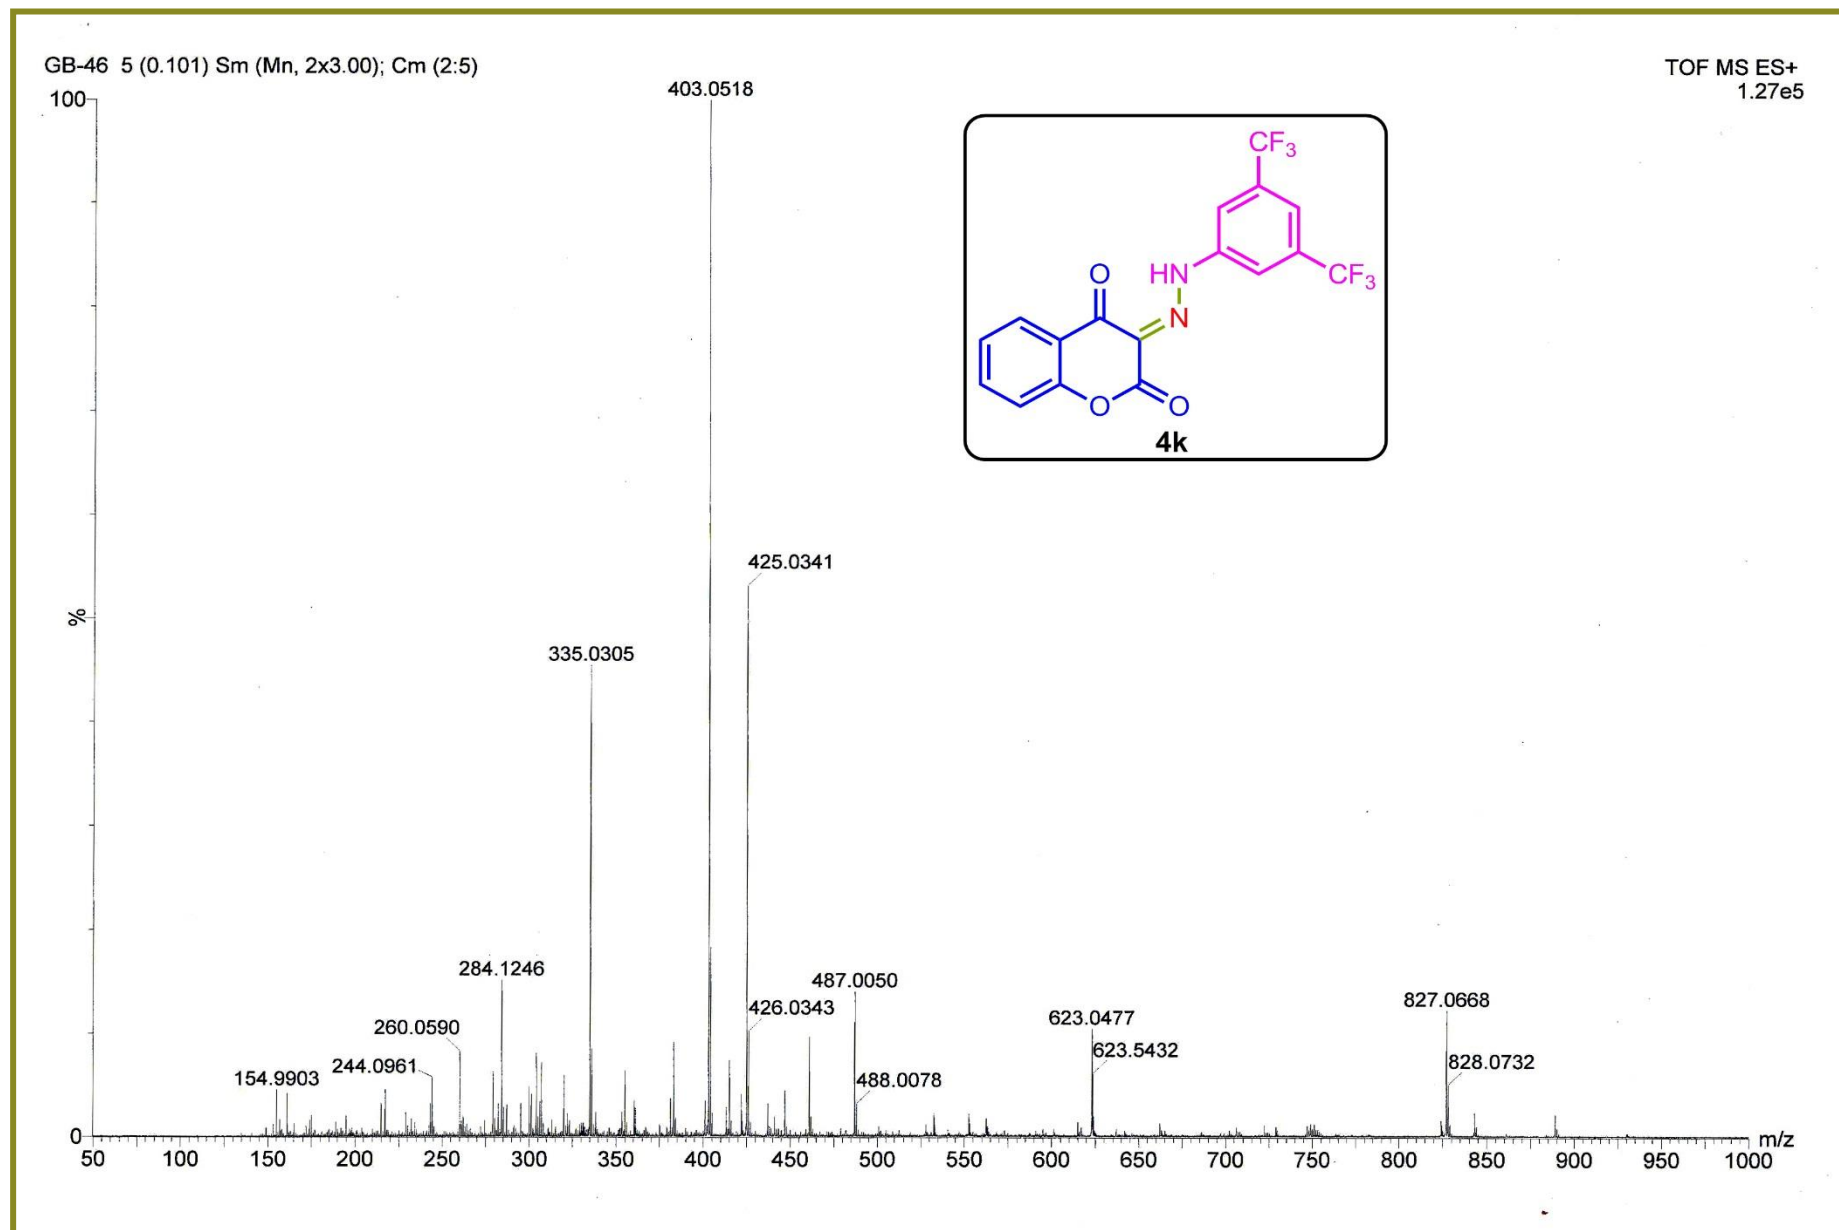

Figure S42. Mass spectra of (*E*)-3-(2-(3,5-bis(trifluoromethyl)phenyl)hydrazono)chroman-2,4-dione (**4k**)



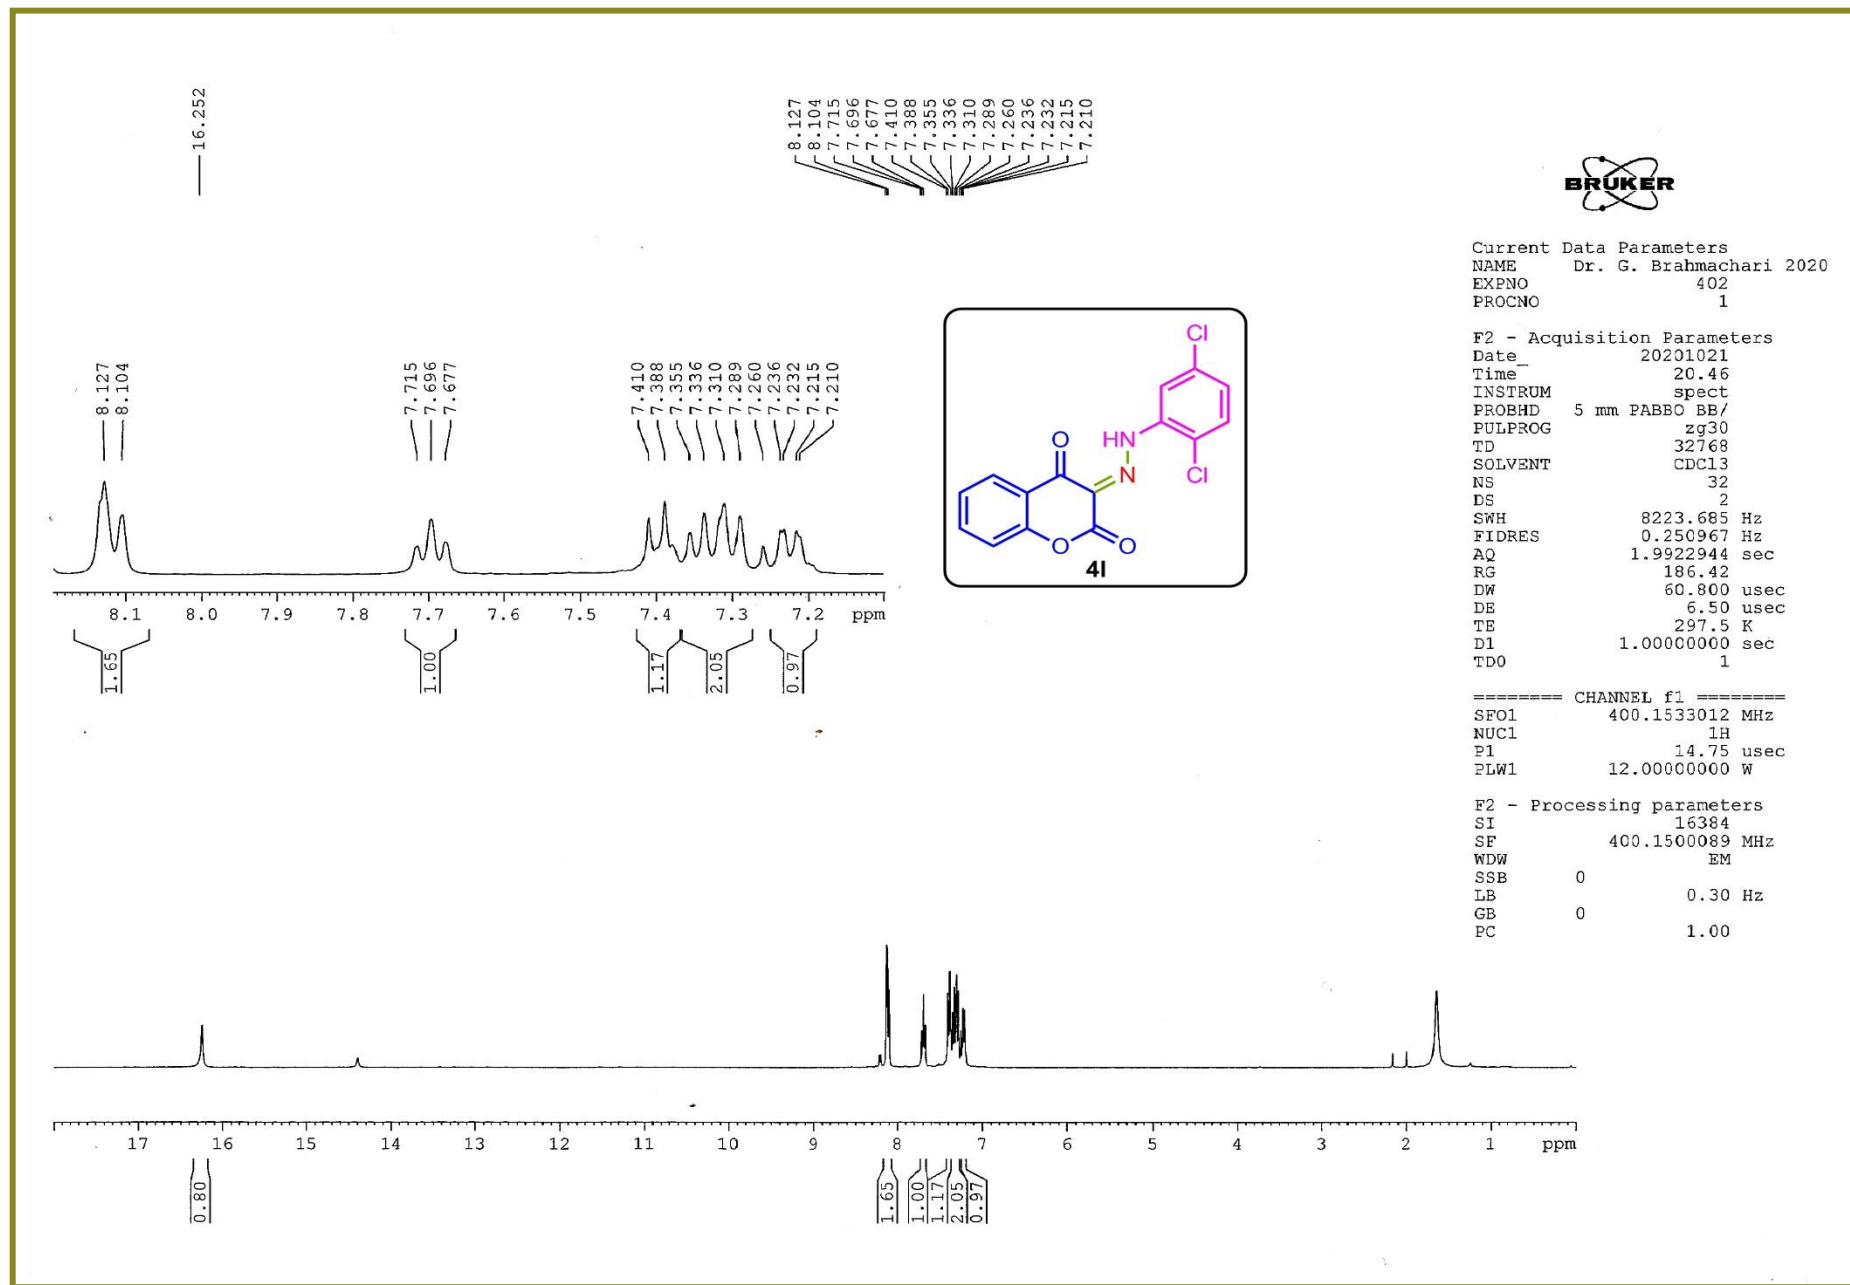

Figure S43. <sup>1</sup>H-NMR spectrum of (*E*)-3-(2-(2,5-dichlorophenyl)hydrazono)chroman-2,4-dione (**4I**)

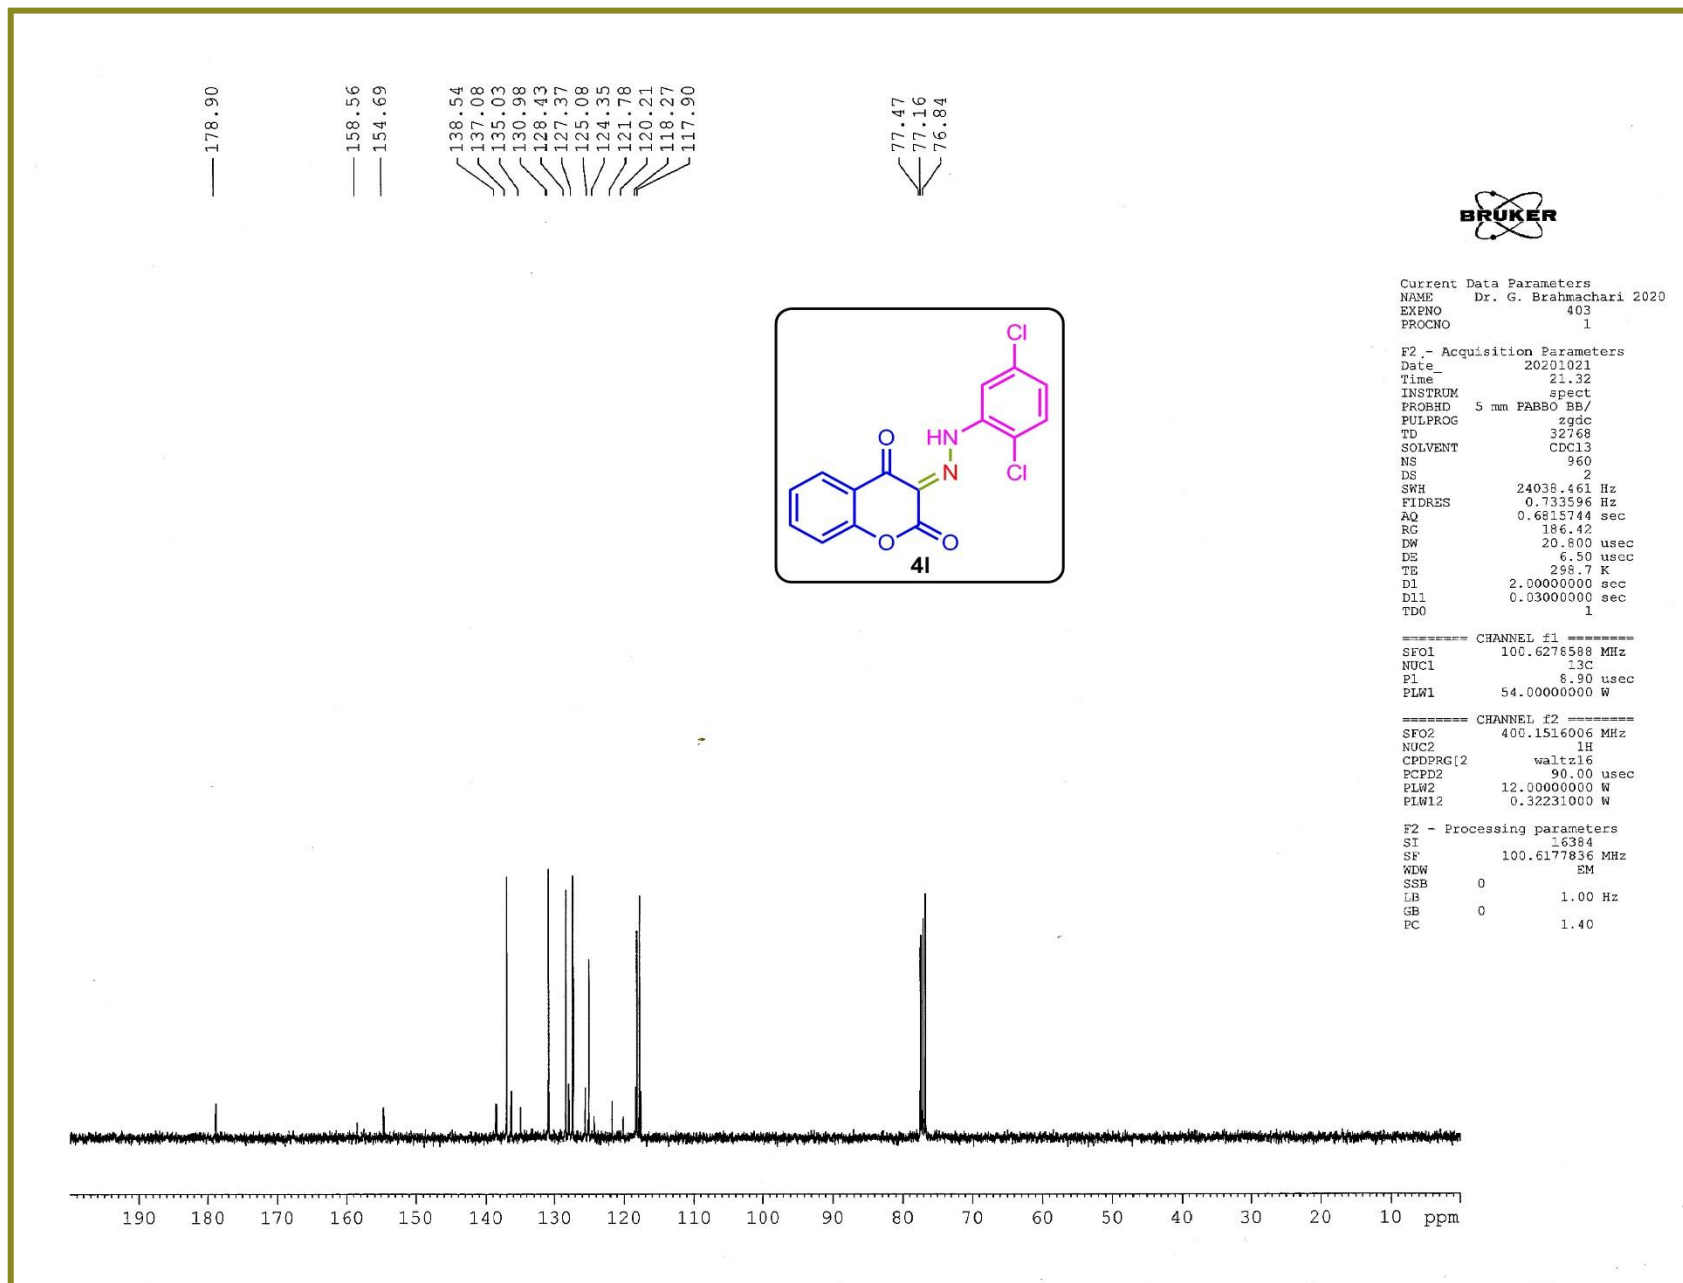

Figure S44. <sup>13</sup>C-NMR spectrum of (*E*)-3-(2-(2,5-dichlorophenyl)hydrazono)chroman-2,4-dione (**41**)

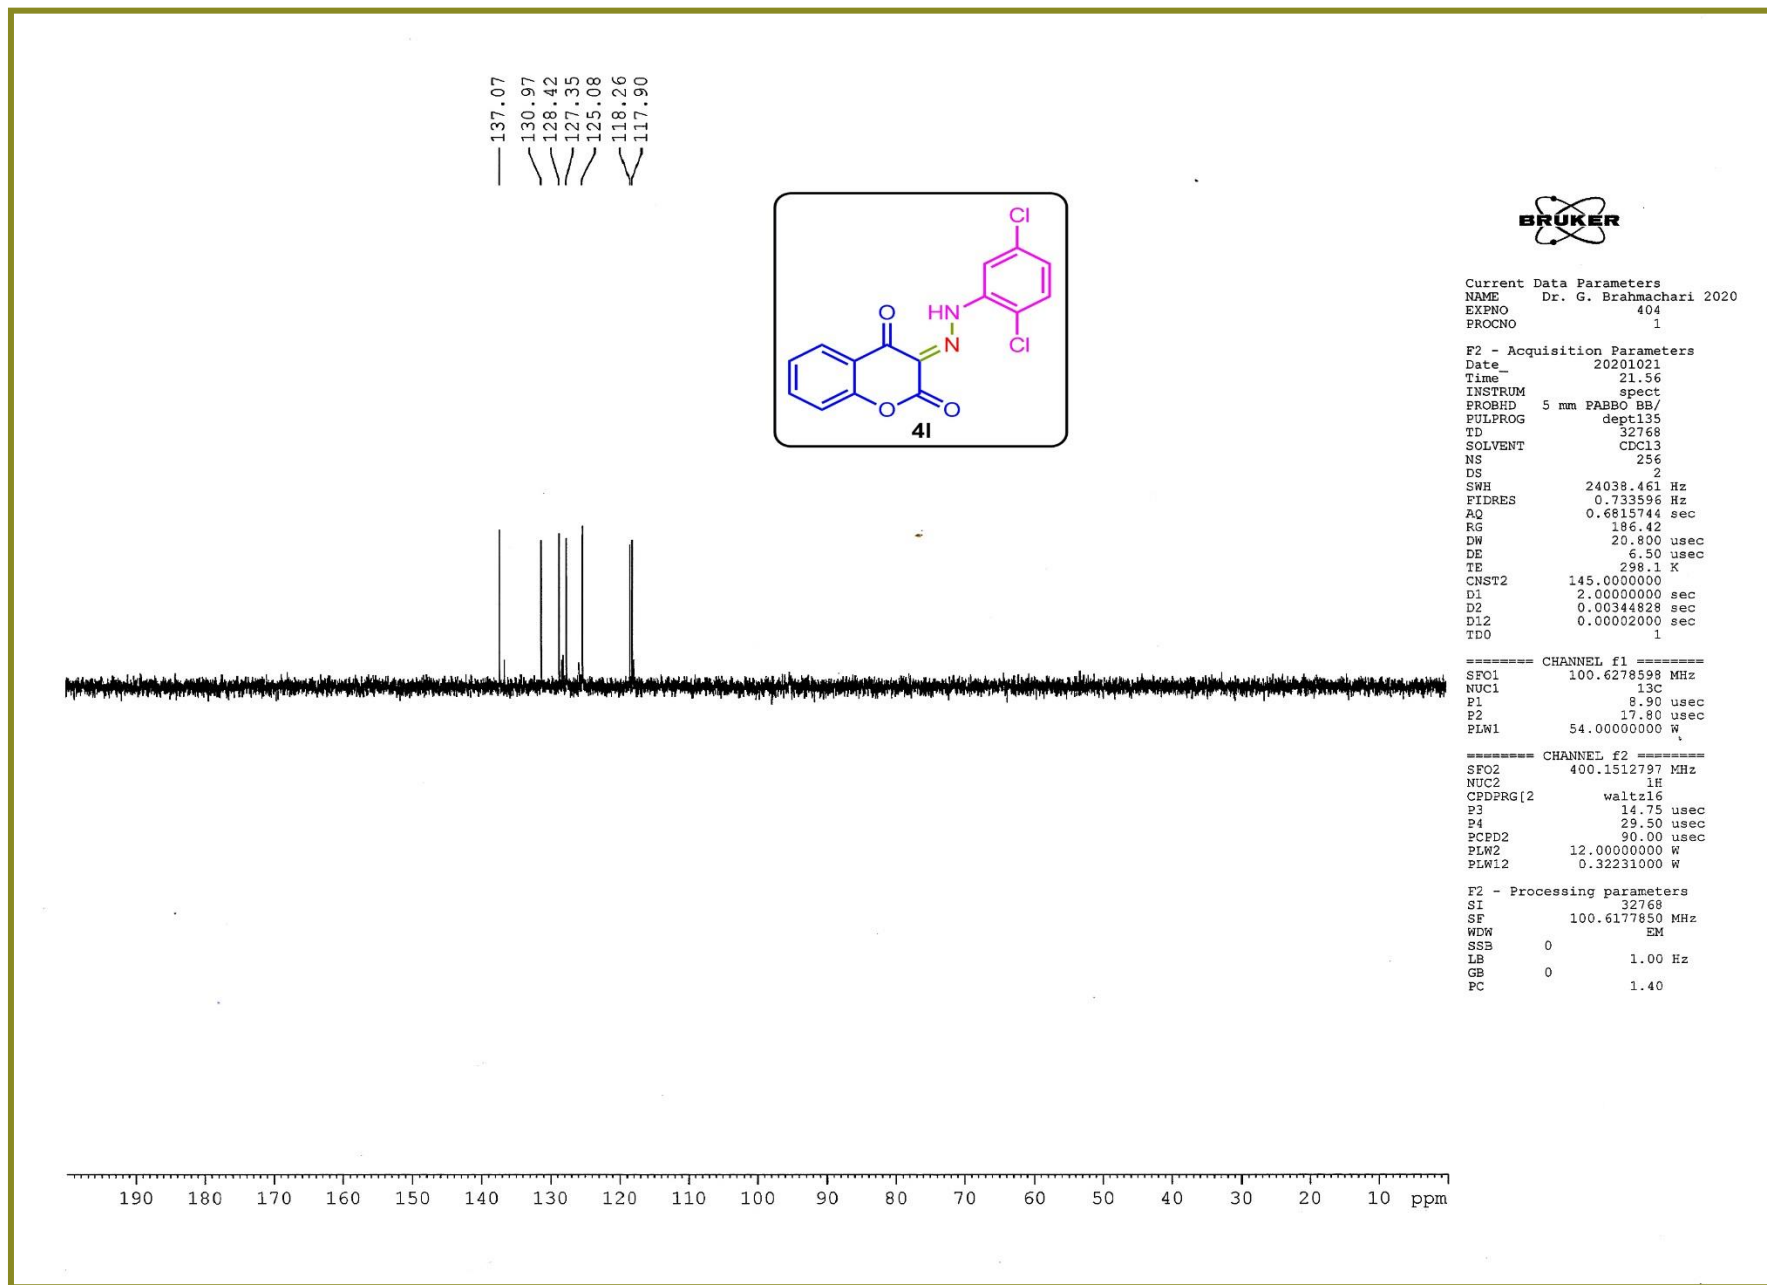

Figure S45. DEPT-135 NMR spectrum of (*E*)-3-(2-(2,5-dichlorophenyl)hydrazono)chroman-2,4-dione (**4I**)

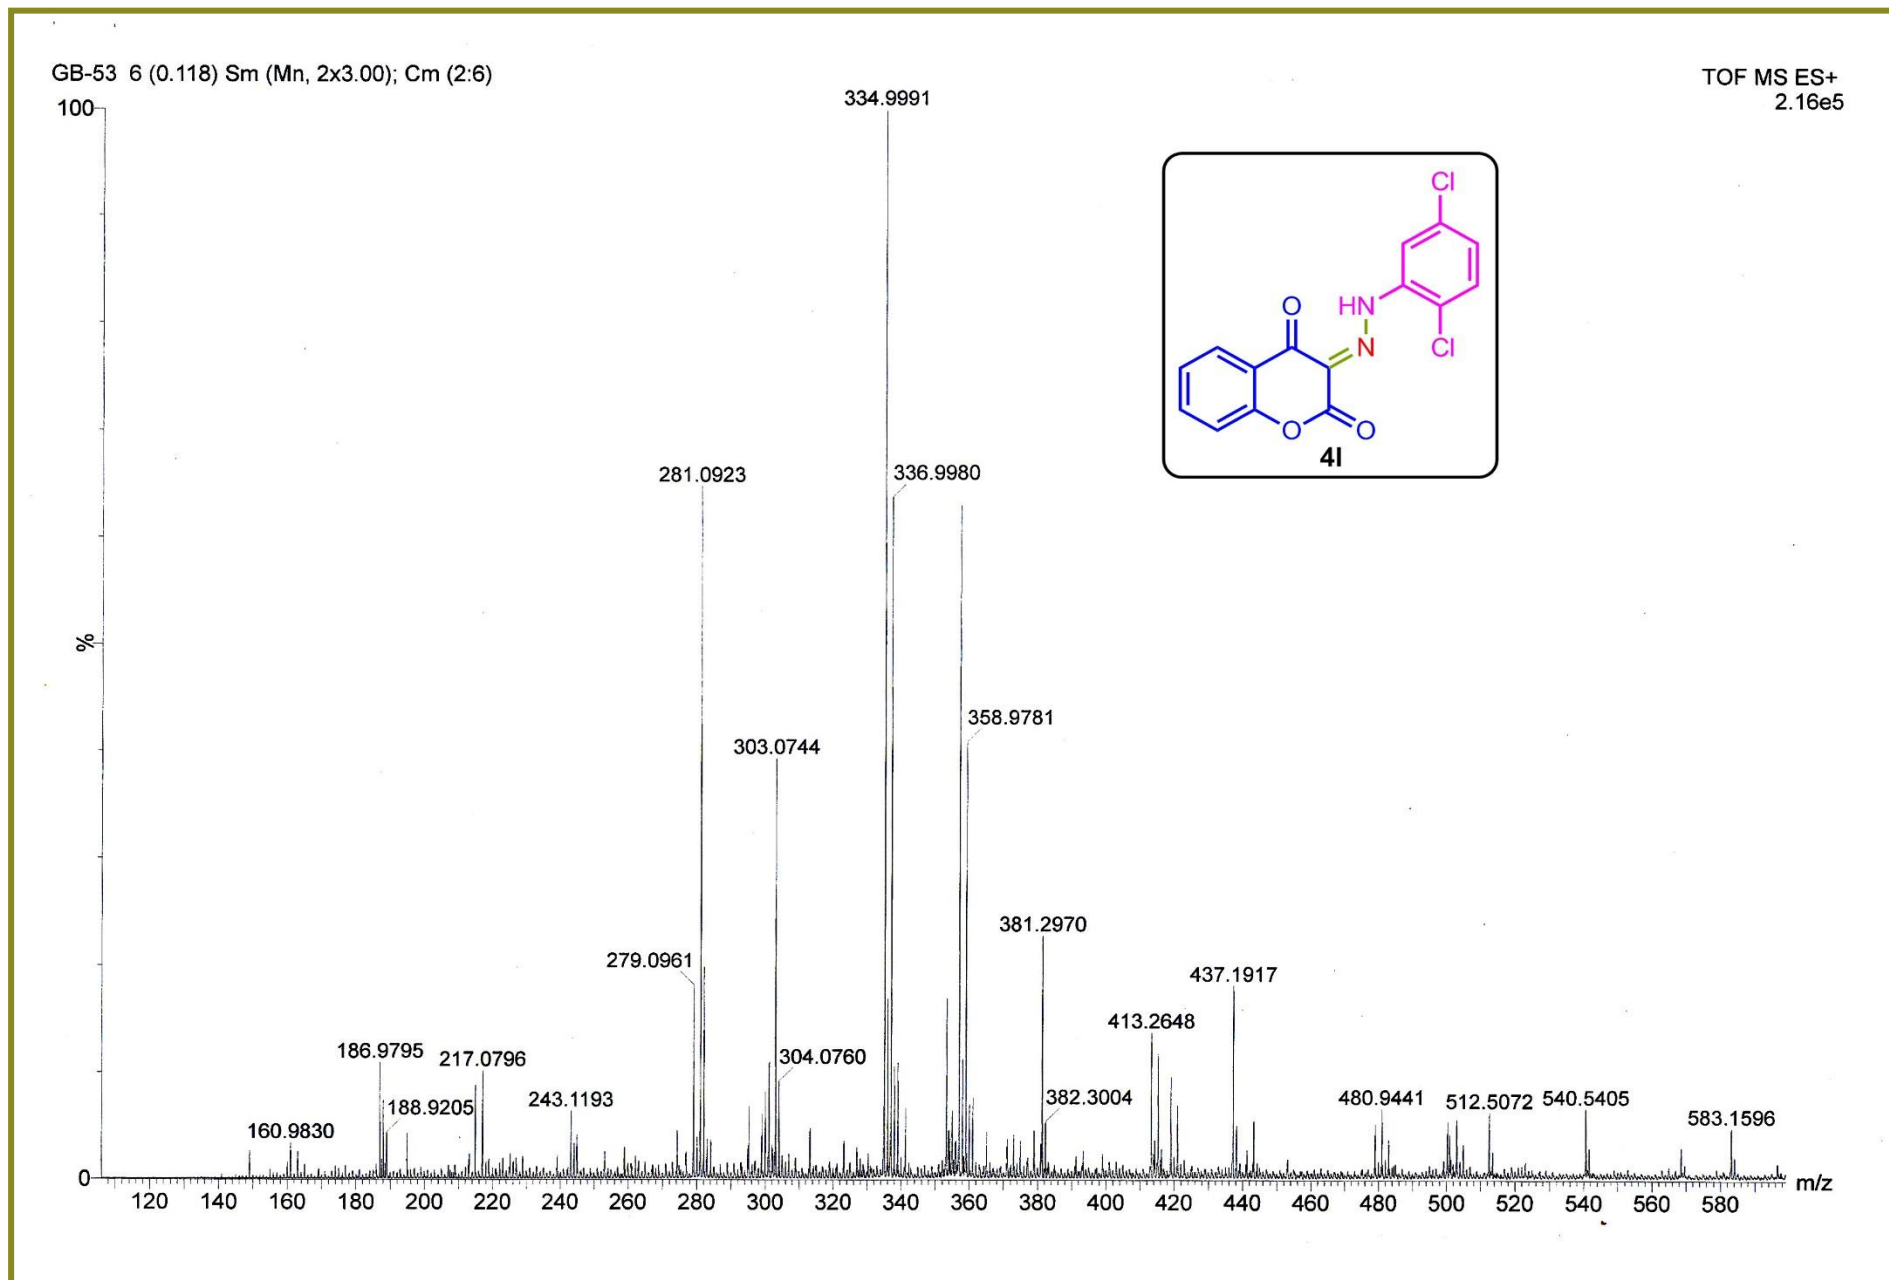

Figure S46. Mass spectra of (*E*)-3-(2-(2,5-dichlorophenyl)hydrazono)chroman-2,4-dione (**4I**)  
S52

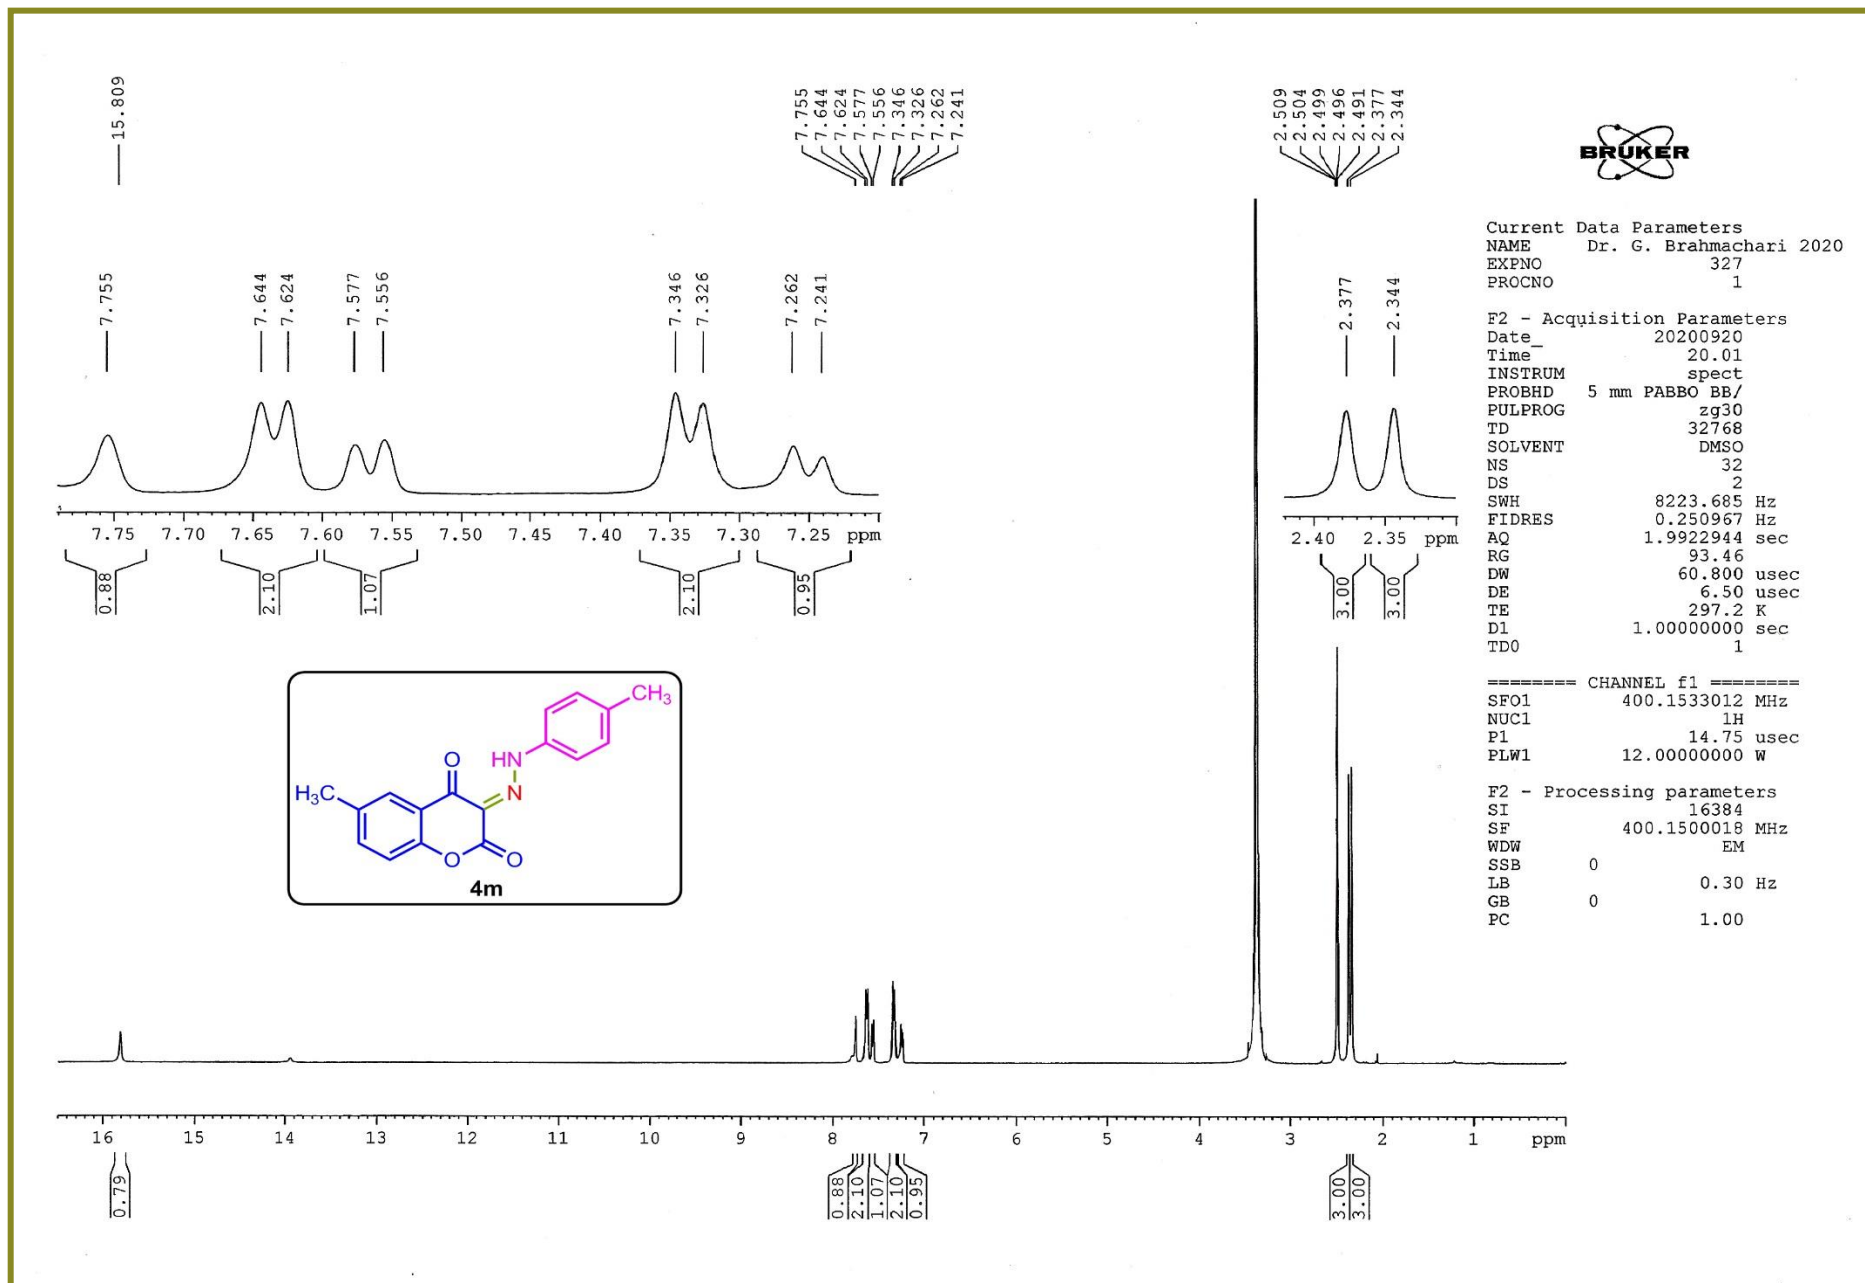

Figure S47. <sup>1</sup>H-NMR spectrum of (*E*)-6-methyl-3-(2-(*p*-tolyl)hydrazineylidene)chromane-2,4-dione (**4m**)

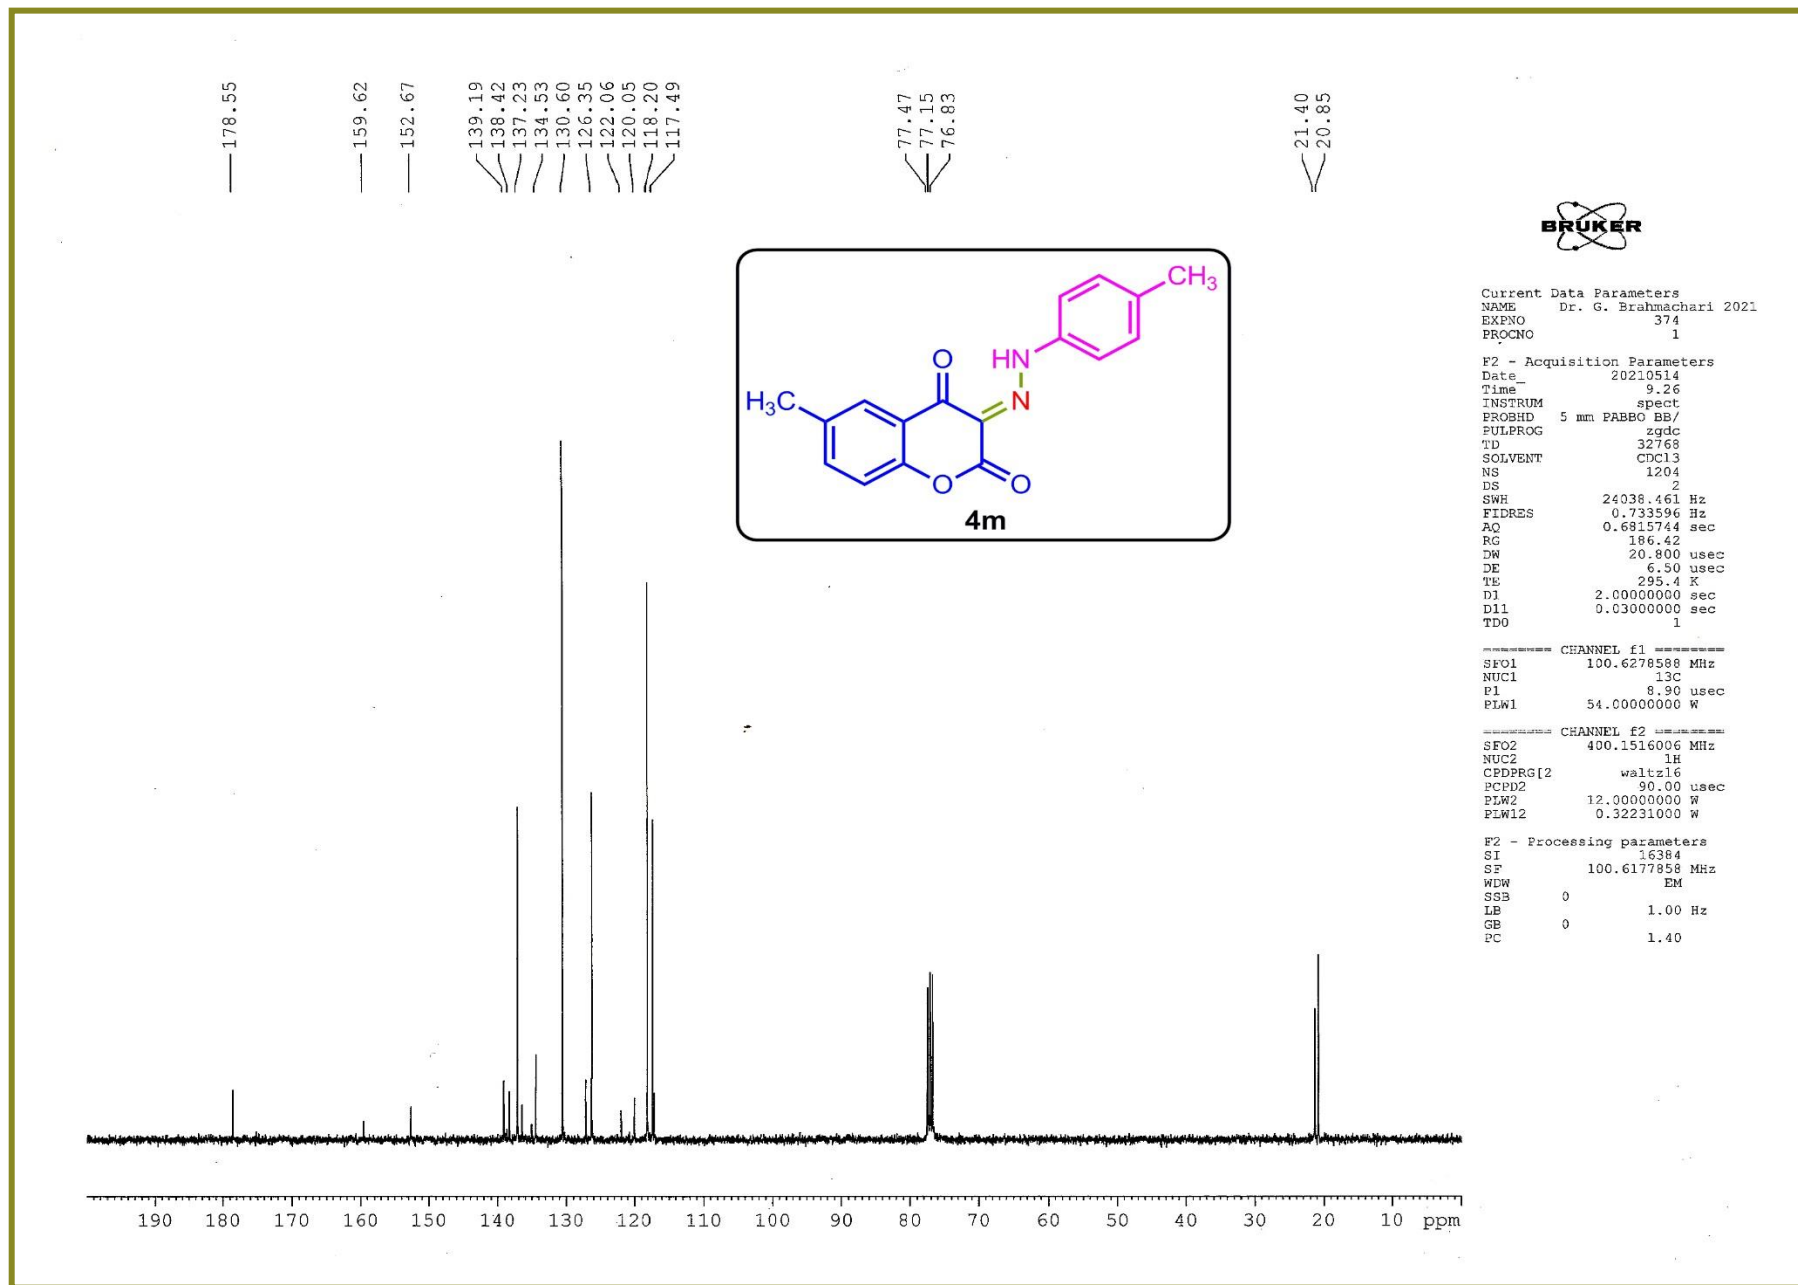

Figure S48. <sup>13</sup>C-NMR spectrum of (*E*)-6-methyl-3-(2-(*p*-tolyl)hydrazineylidene)chromane-2,4-dione (**4m**)

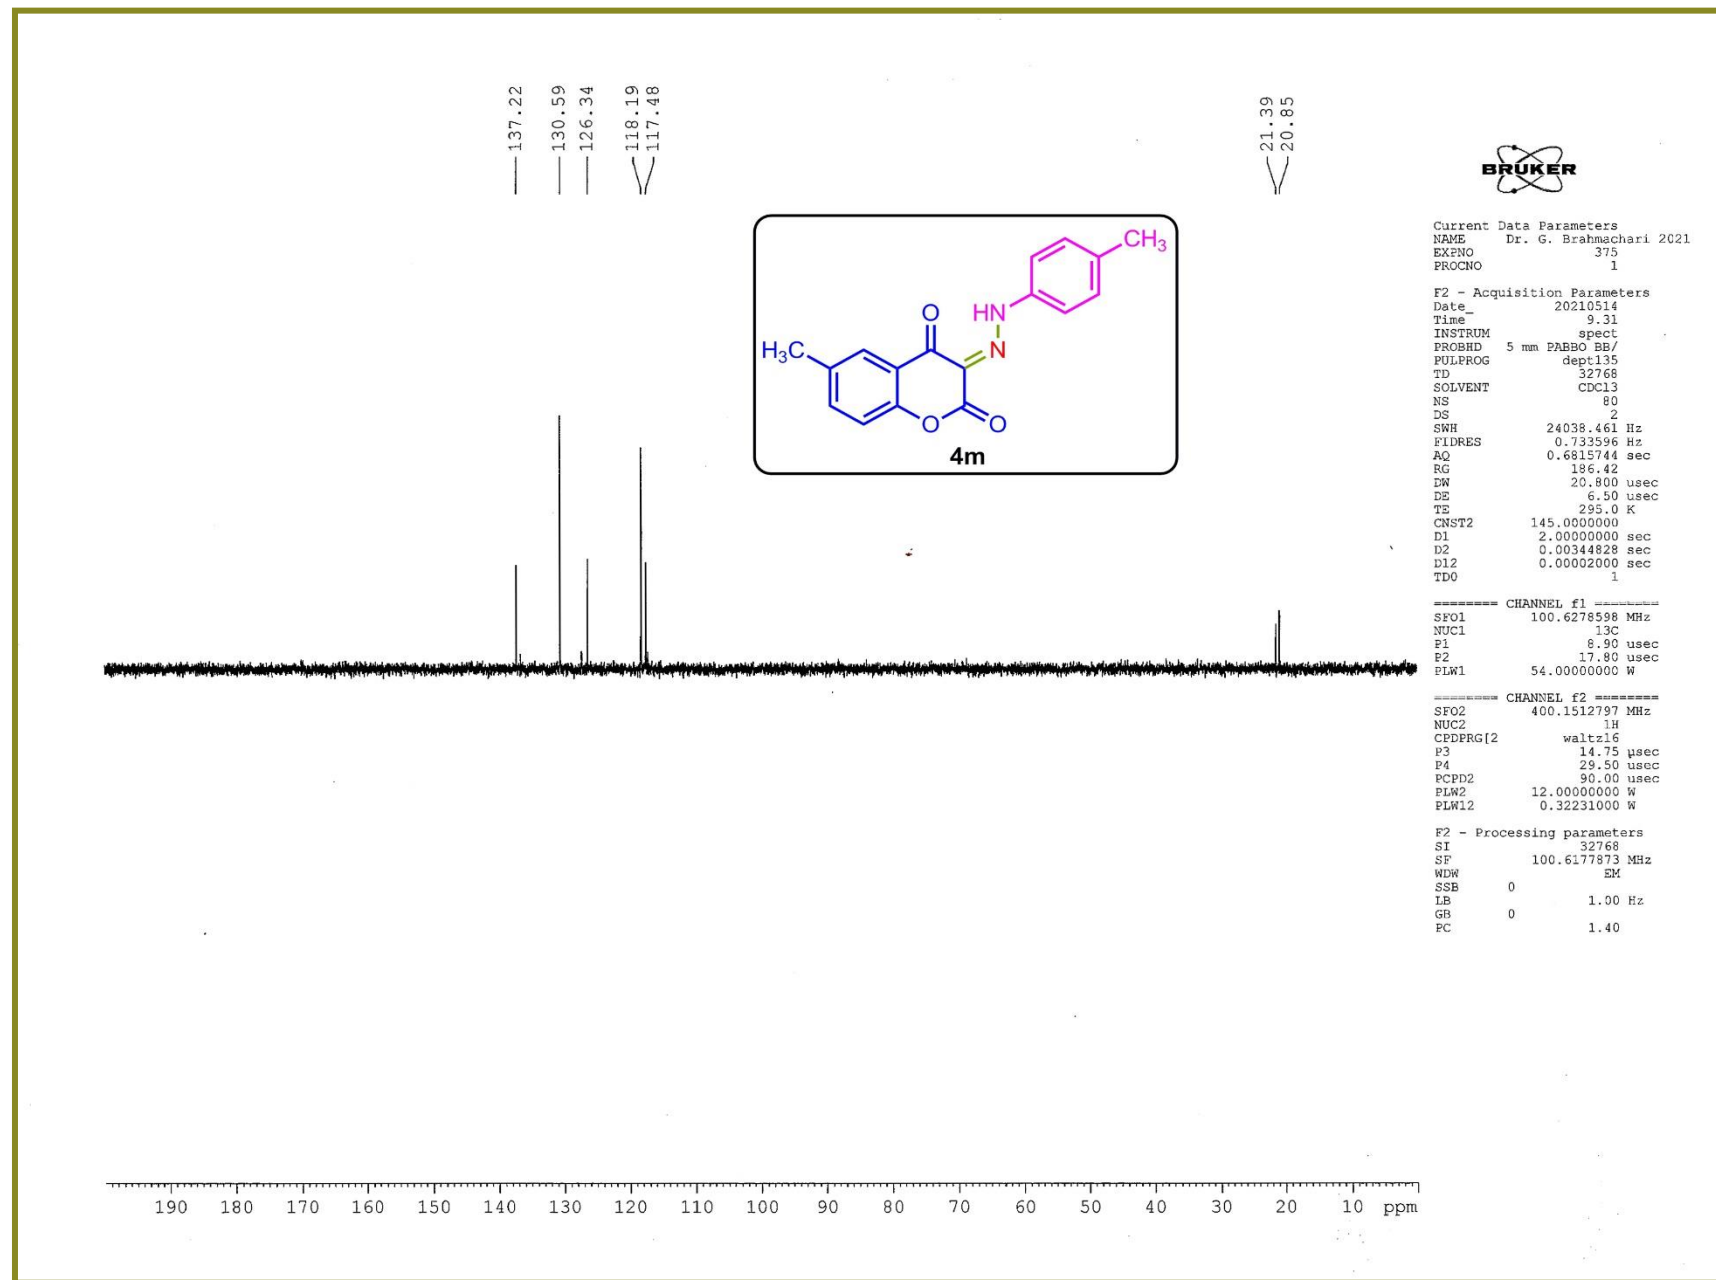

Figure S49. Dept-135 NMR spectrum of (*E*)-6-methyl-3-(2-(*p*-tolyl)hydrazineylidene)chromane-2,4-dione (**4m**)

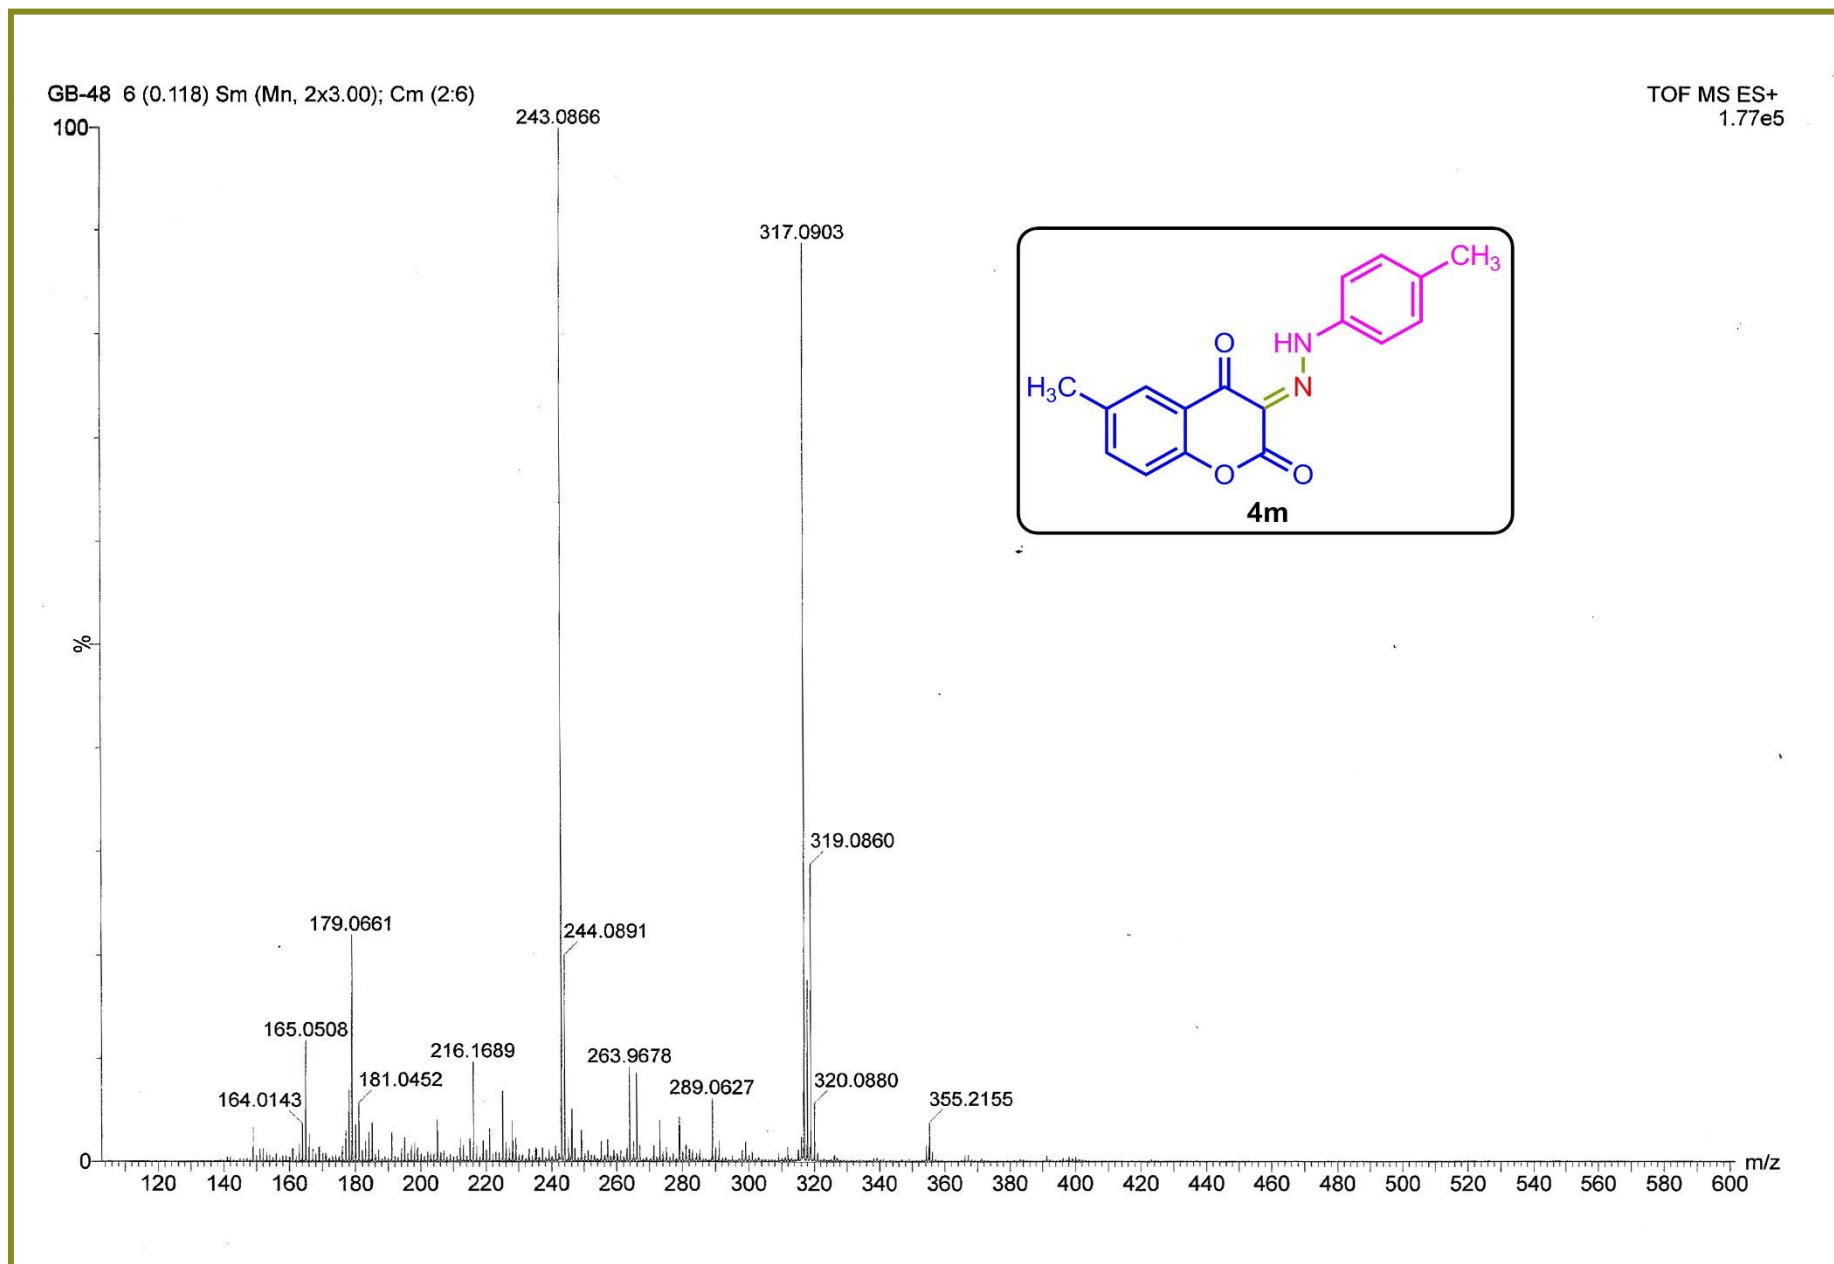

Figure S50. Mass spectra of (*E*)-6-methyl-3-(2-(*p*-tolyl)hydrazineylidene)chromane-2,4-dione (**4m**)



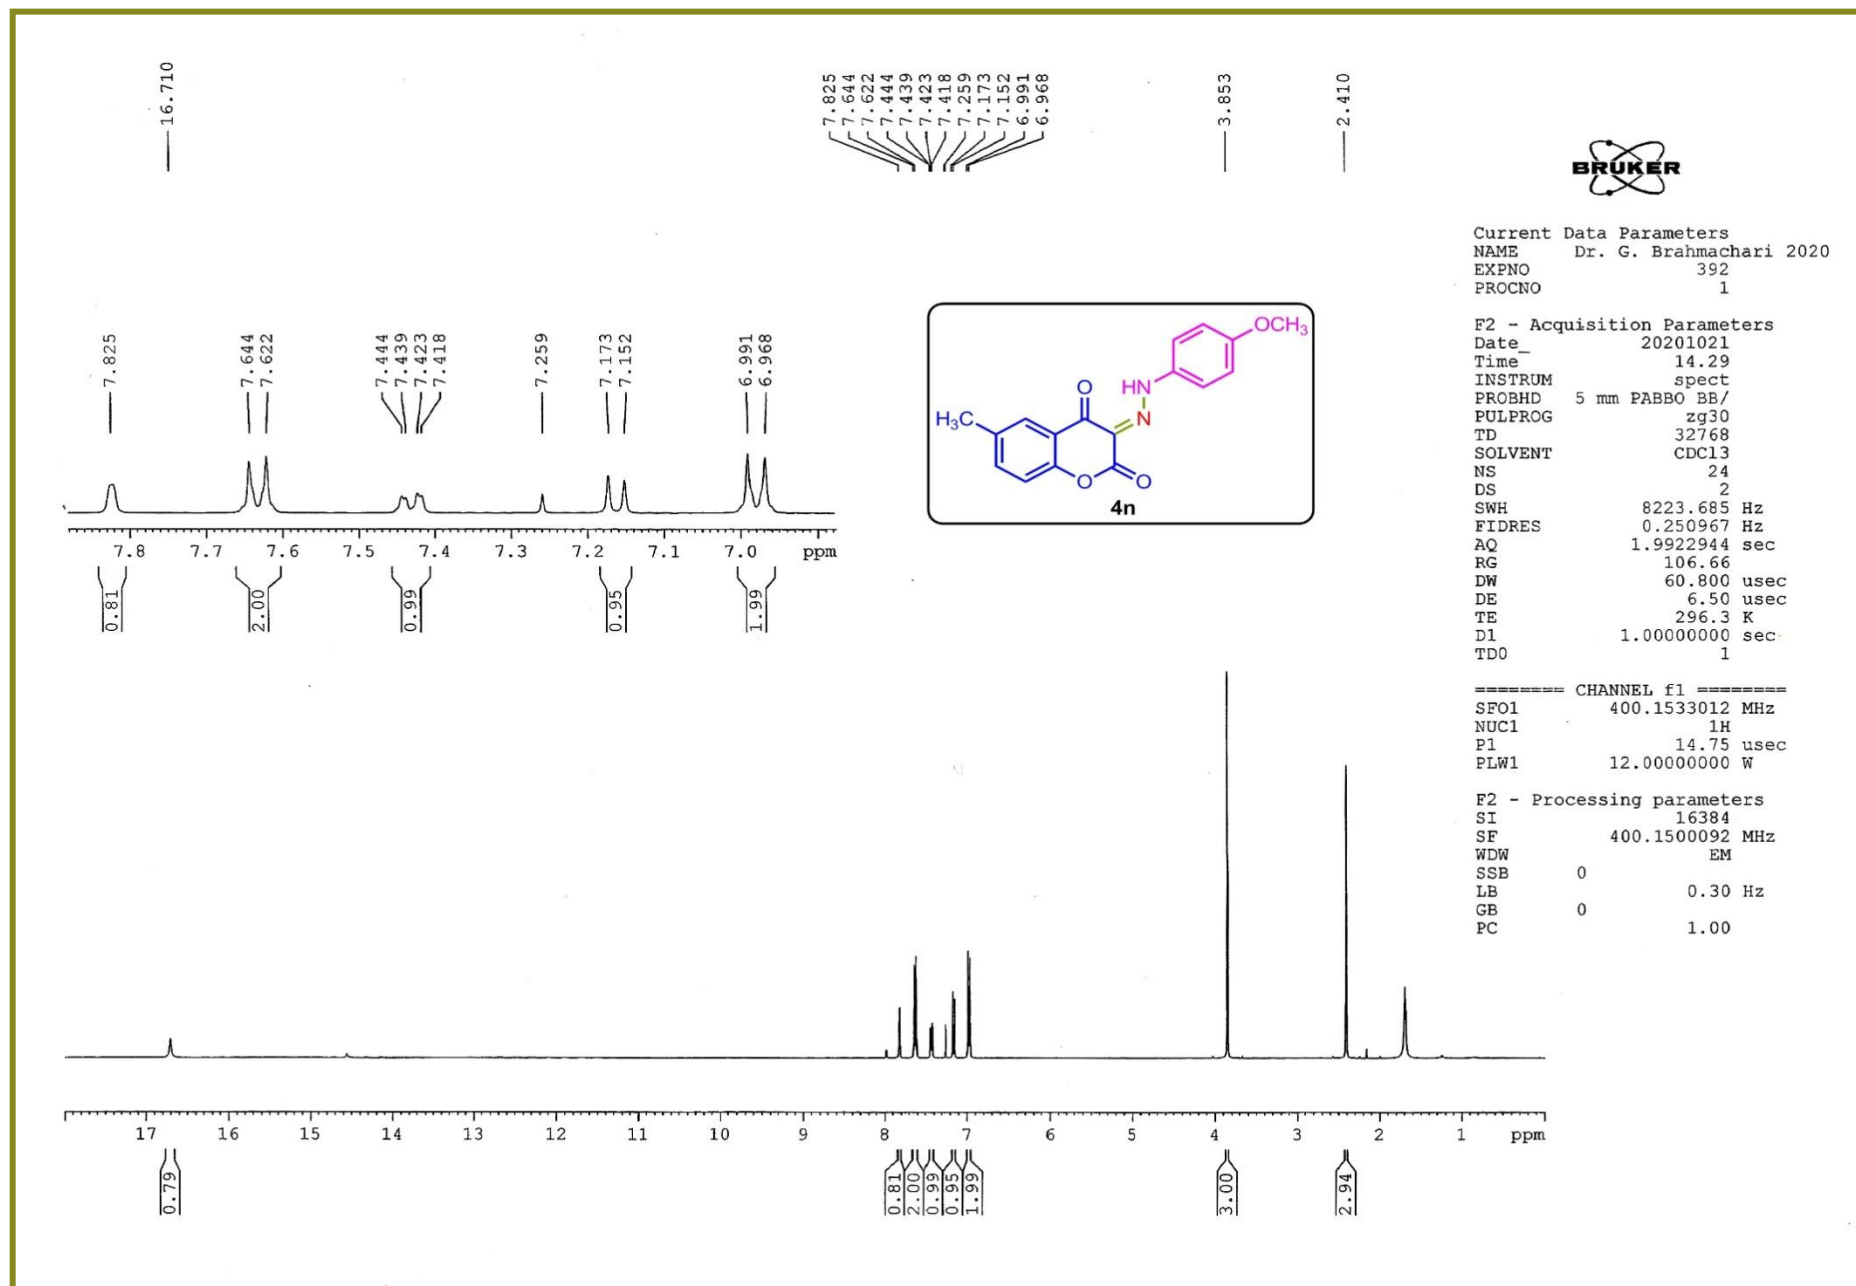

Figure S51. <sup>1</sup>H-NMR spectrum of (*E*)-3-(2-(4-methoxyphenyl)hydrazineylidene)-6-methylchromane-2,4-dione (**4n**)

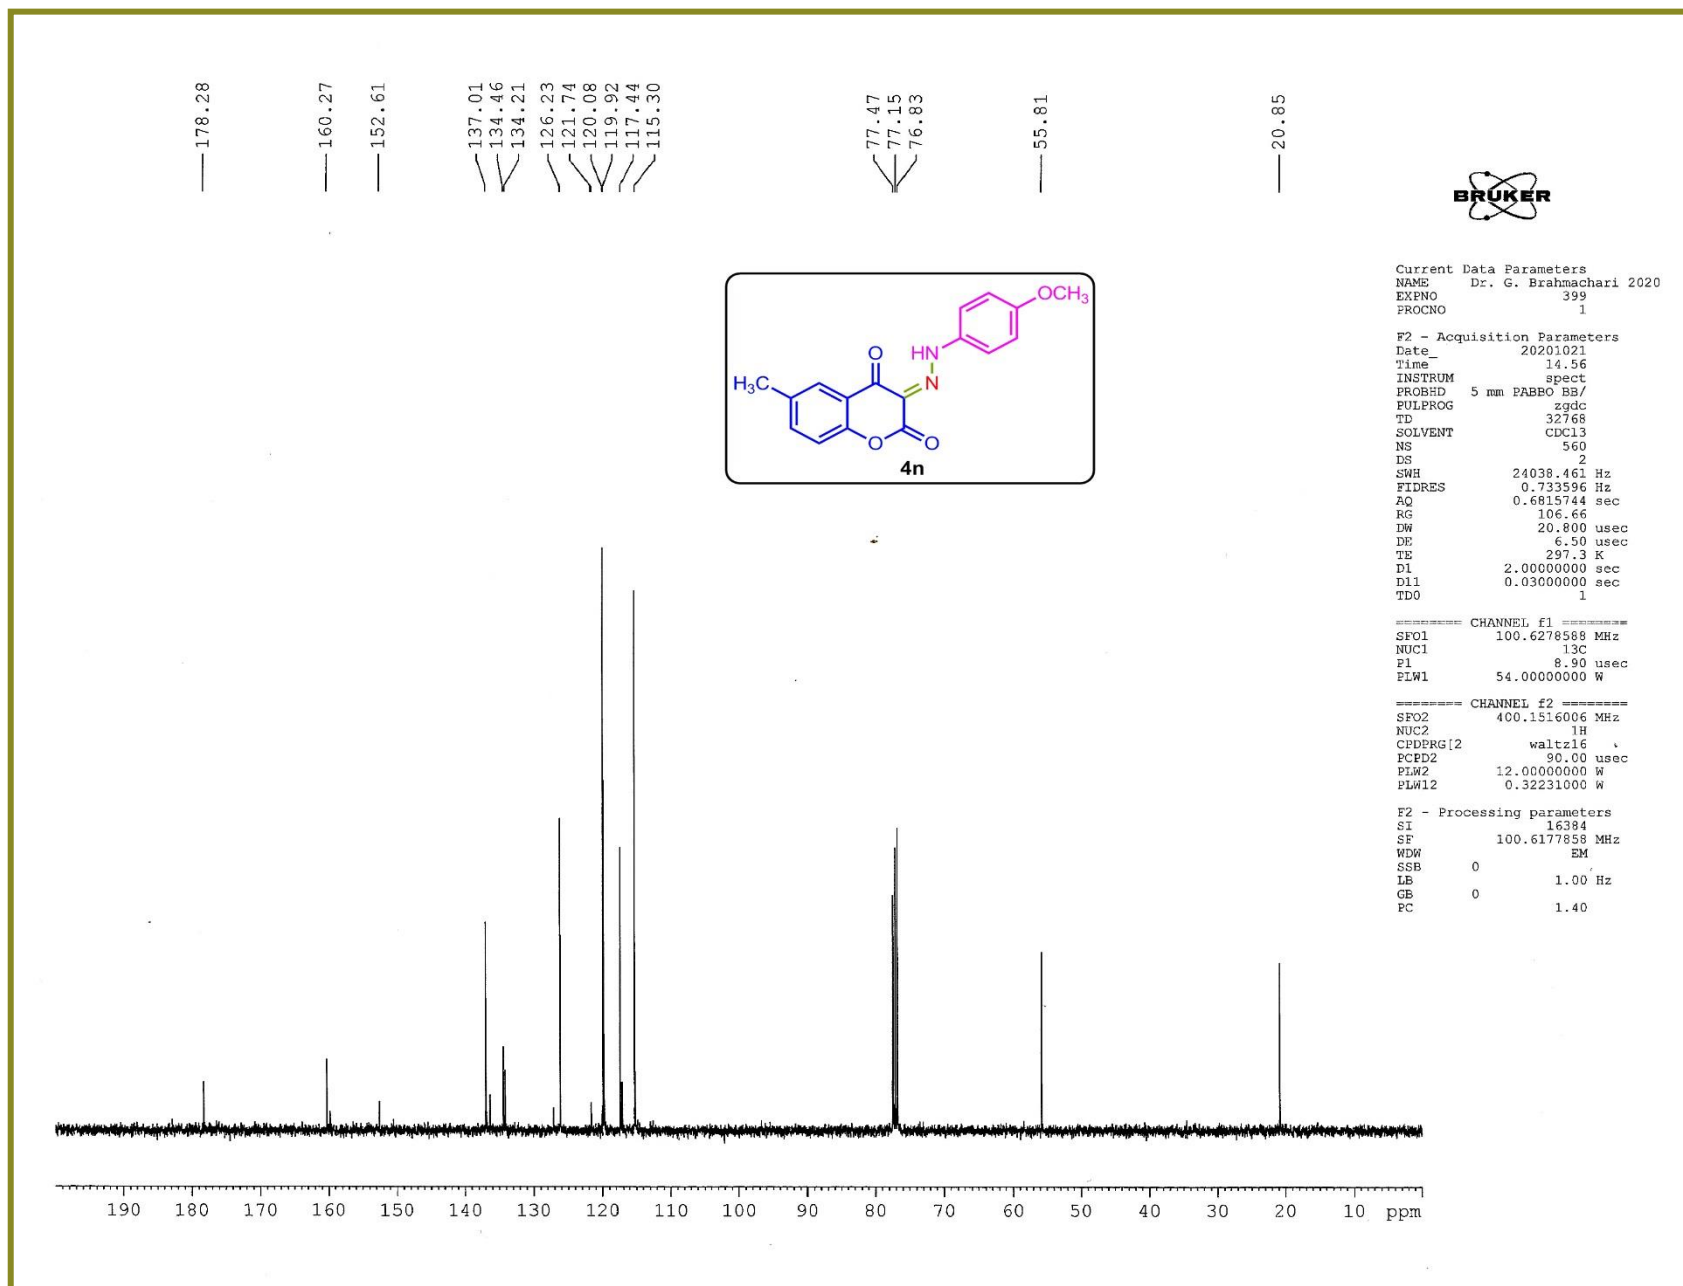

Figure S52. <sup>13</sup>C-NMR spectrum of (*E*)-3-(2-(4-methoxyphenyl)hydrazineylidene)-6-methylchromane-2,4-dione (**4n**)

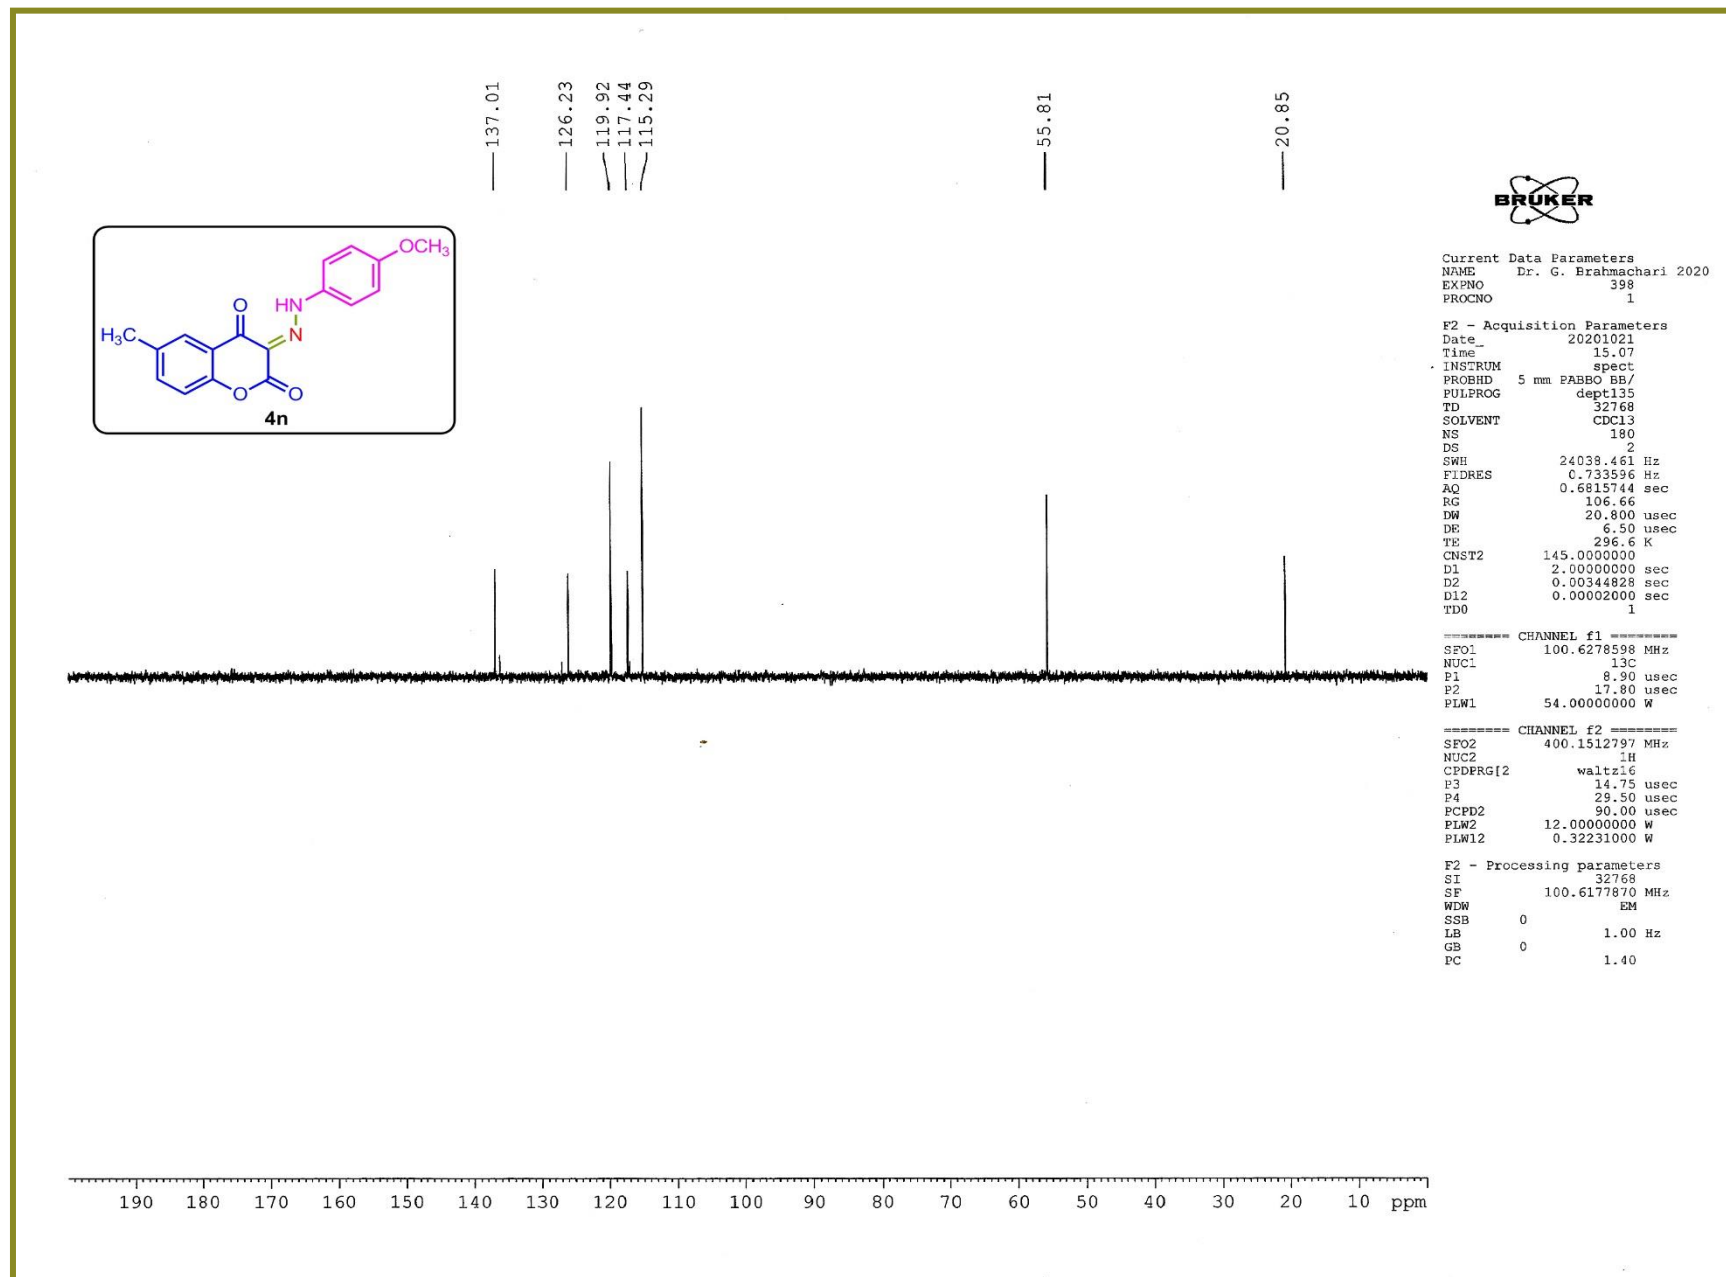

Figure S53. DEPT-135 NMR spectrum of (*E*)-3-(2-(4-methoxyphenyl)hydrazineylidene)-6-methylchromane-2,4-dione (**4n**)

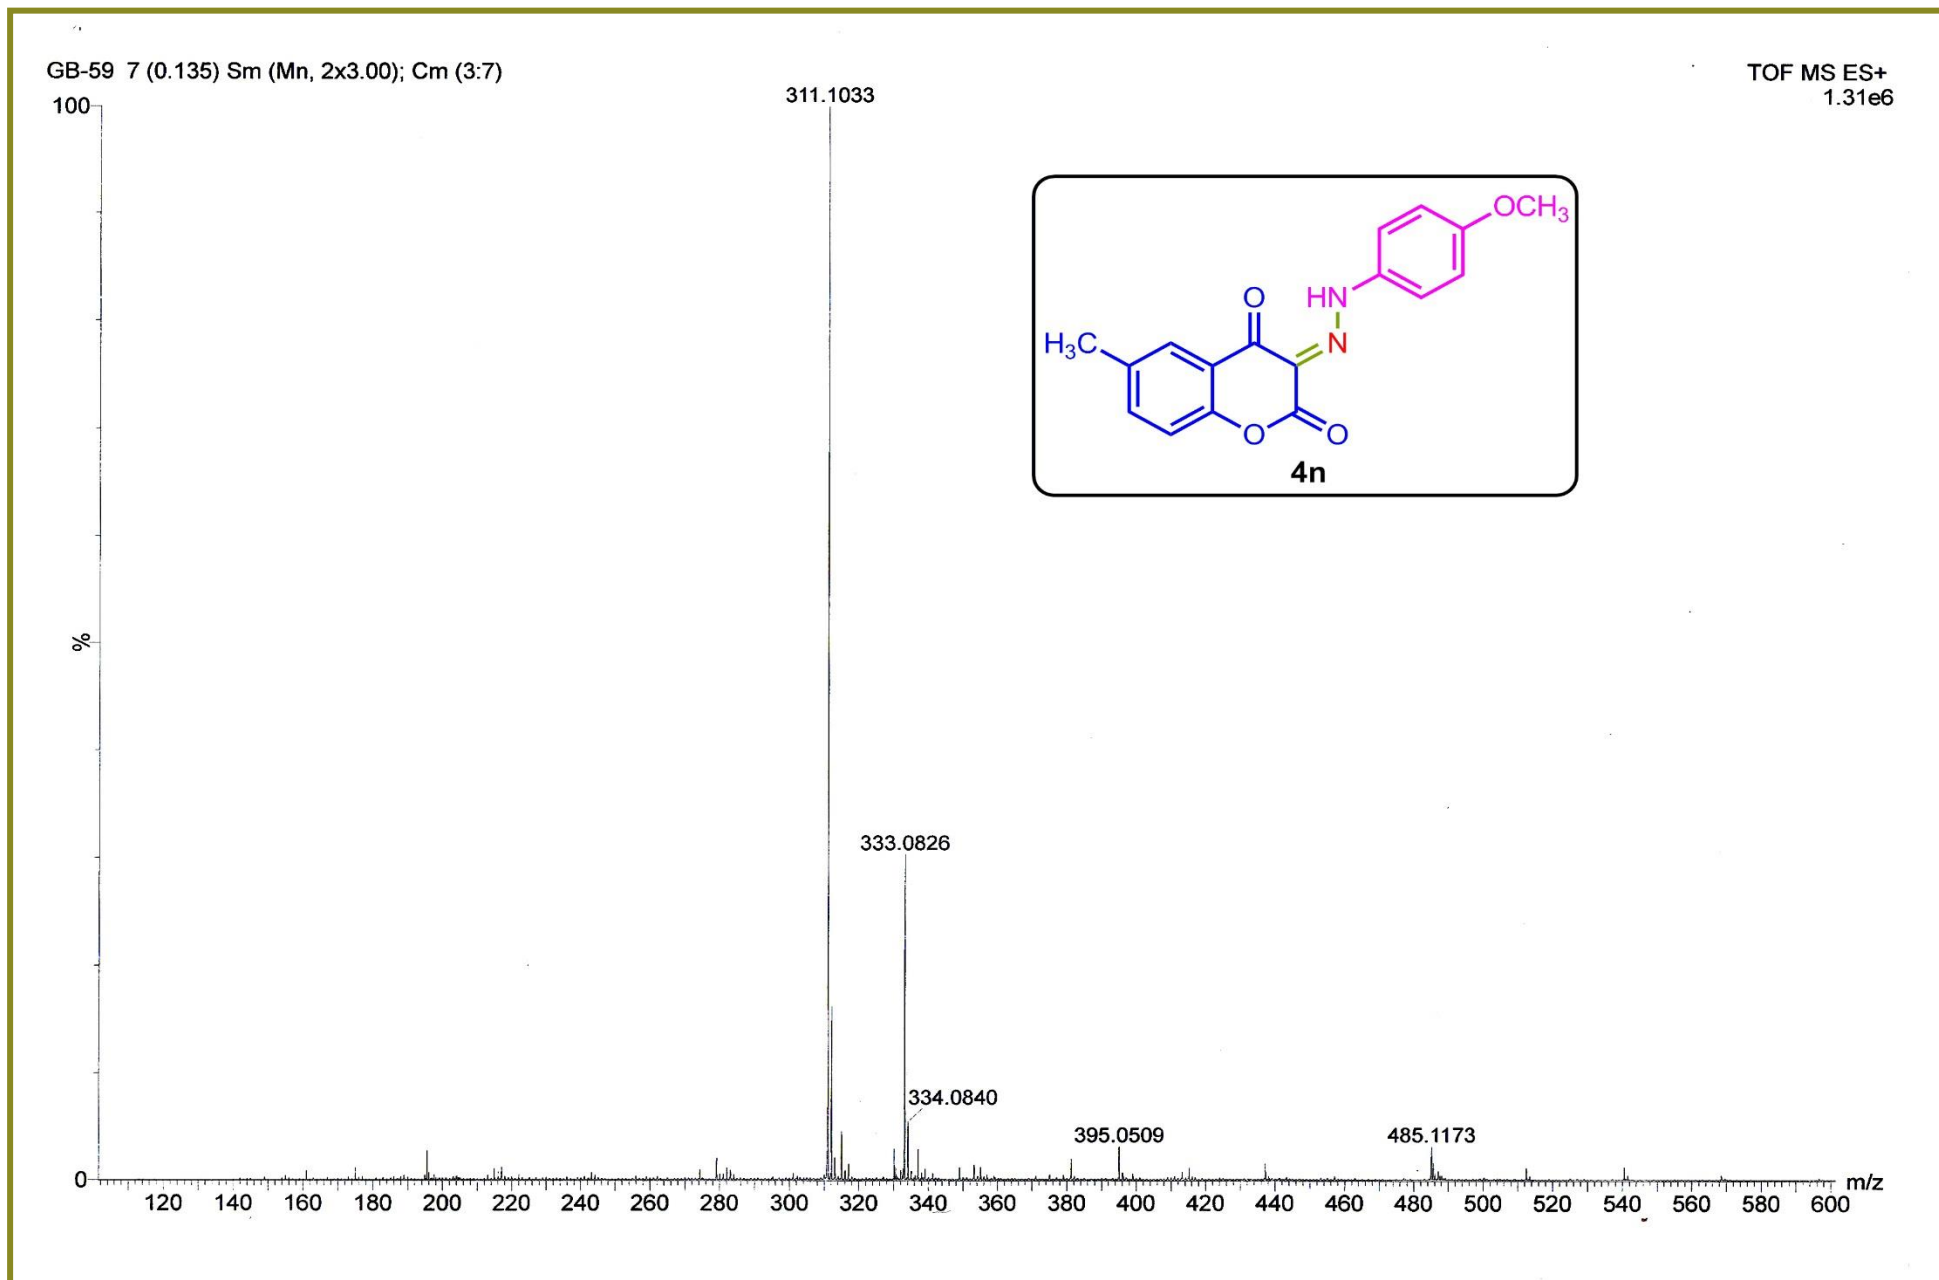

Figure S54. Mass spectra of (*E*)-3-(2-(4-methoxyphenyl)hydrazineylidene)-6-methylchromane-2,4-dione (**4n**)

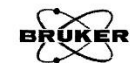

Current Data Parameters  
NAME Dr. G. Brahmachari 2020  
EXPNO 346  
PROCNO 1

F2 - Acquisition Parameters  
Date\_ 20201004  
Time\_ 17.38  
INSTRUM spect  
PROBHD 5 mm PABBO BB/  
PULPROG zg30  
TD 32768  
SOLVENT CDCl3  
NS 32  
DS 2  
SWH 8223.685 Hz  
FIDRES 0.250967 Hz  
AQ 1.9922944 sec  
RG 186.42  
DW 60.800 usec  
DE 6.50 usec  
TE 295.7 K  
D1 1.00000000 sec  
TD0 1

===== CHANNEL f1 =====  
SF01 400.1533012 MHz  
NUC1 1H  
P1 14.75 usec  
PLW1 12.00000000 W

F2 - Processing parameters  
SI 16384  
SF 400.1500087 MHz  
WDW EM  
SSB 0  
LB 0.30 Hz  
GB 0  
PC 1.00

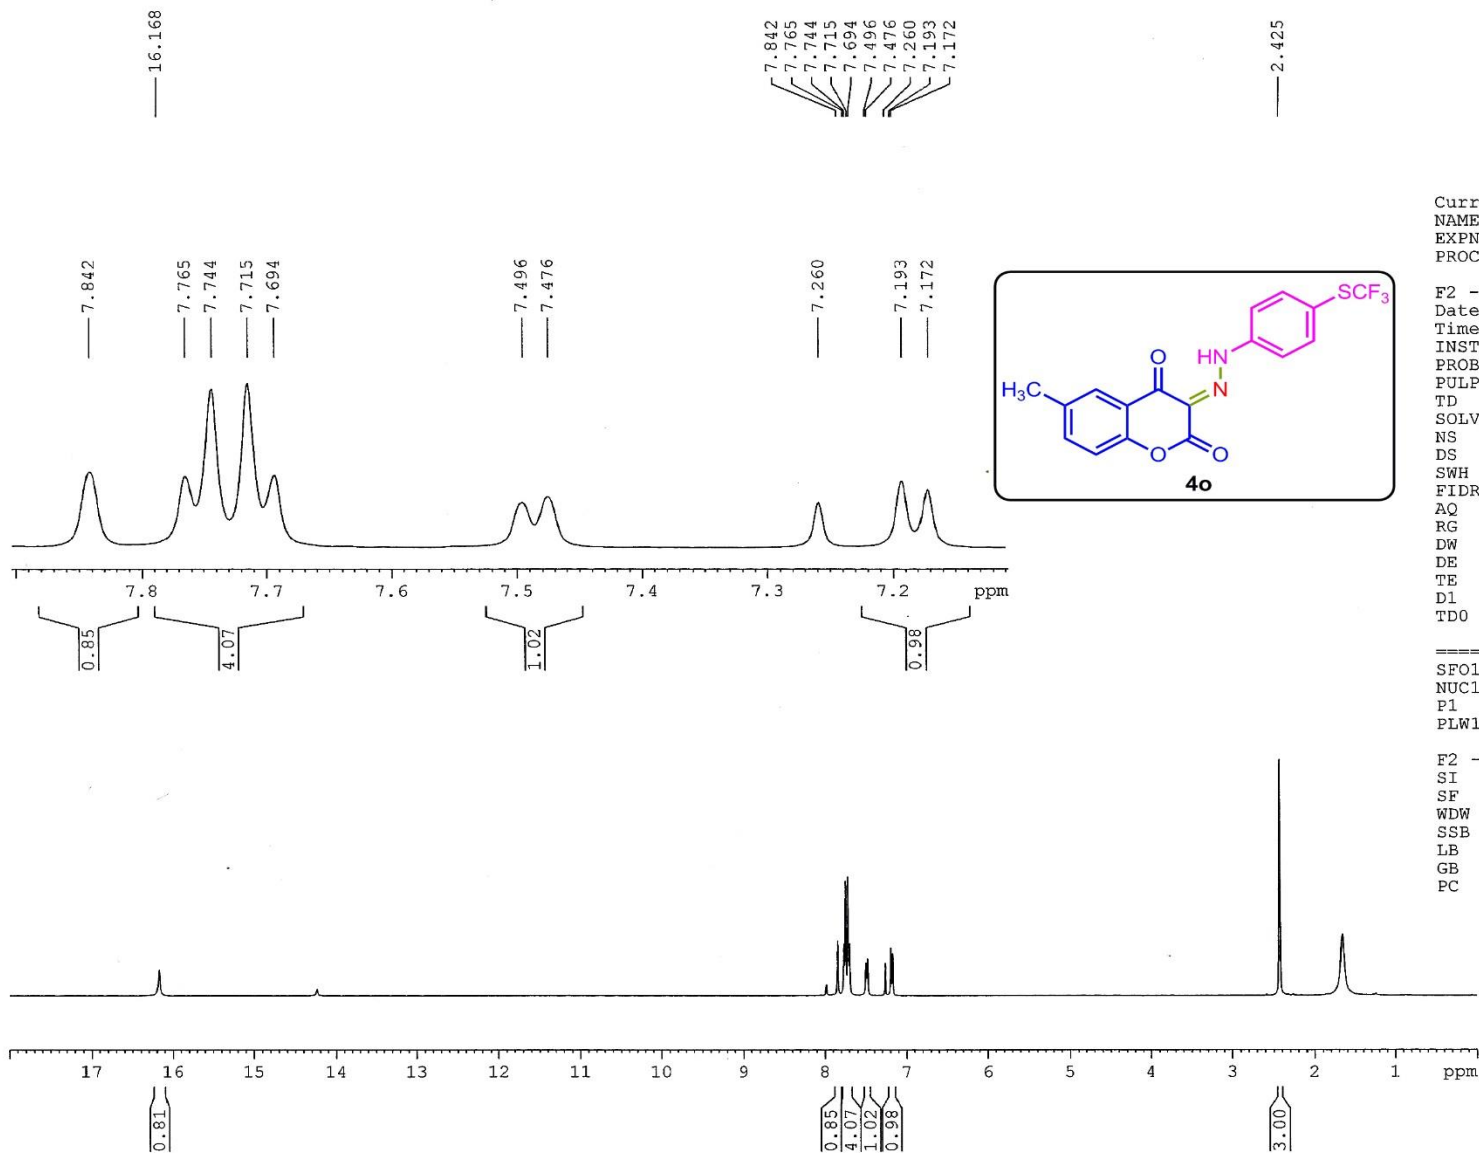

Figure S55. <sup>1</sup>H-NMR spectrum of (*E*)-6-methyl-3-(2-(4-((trifluoromethyl)thio)phenyl)hydrazineylidene)chromane-2,4-dione (**4o**)

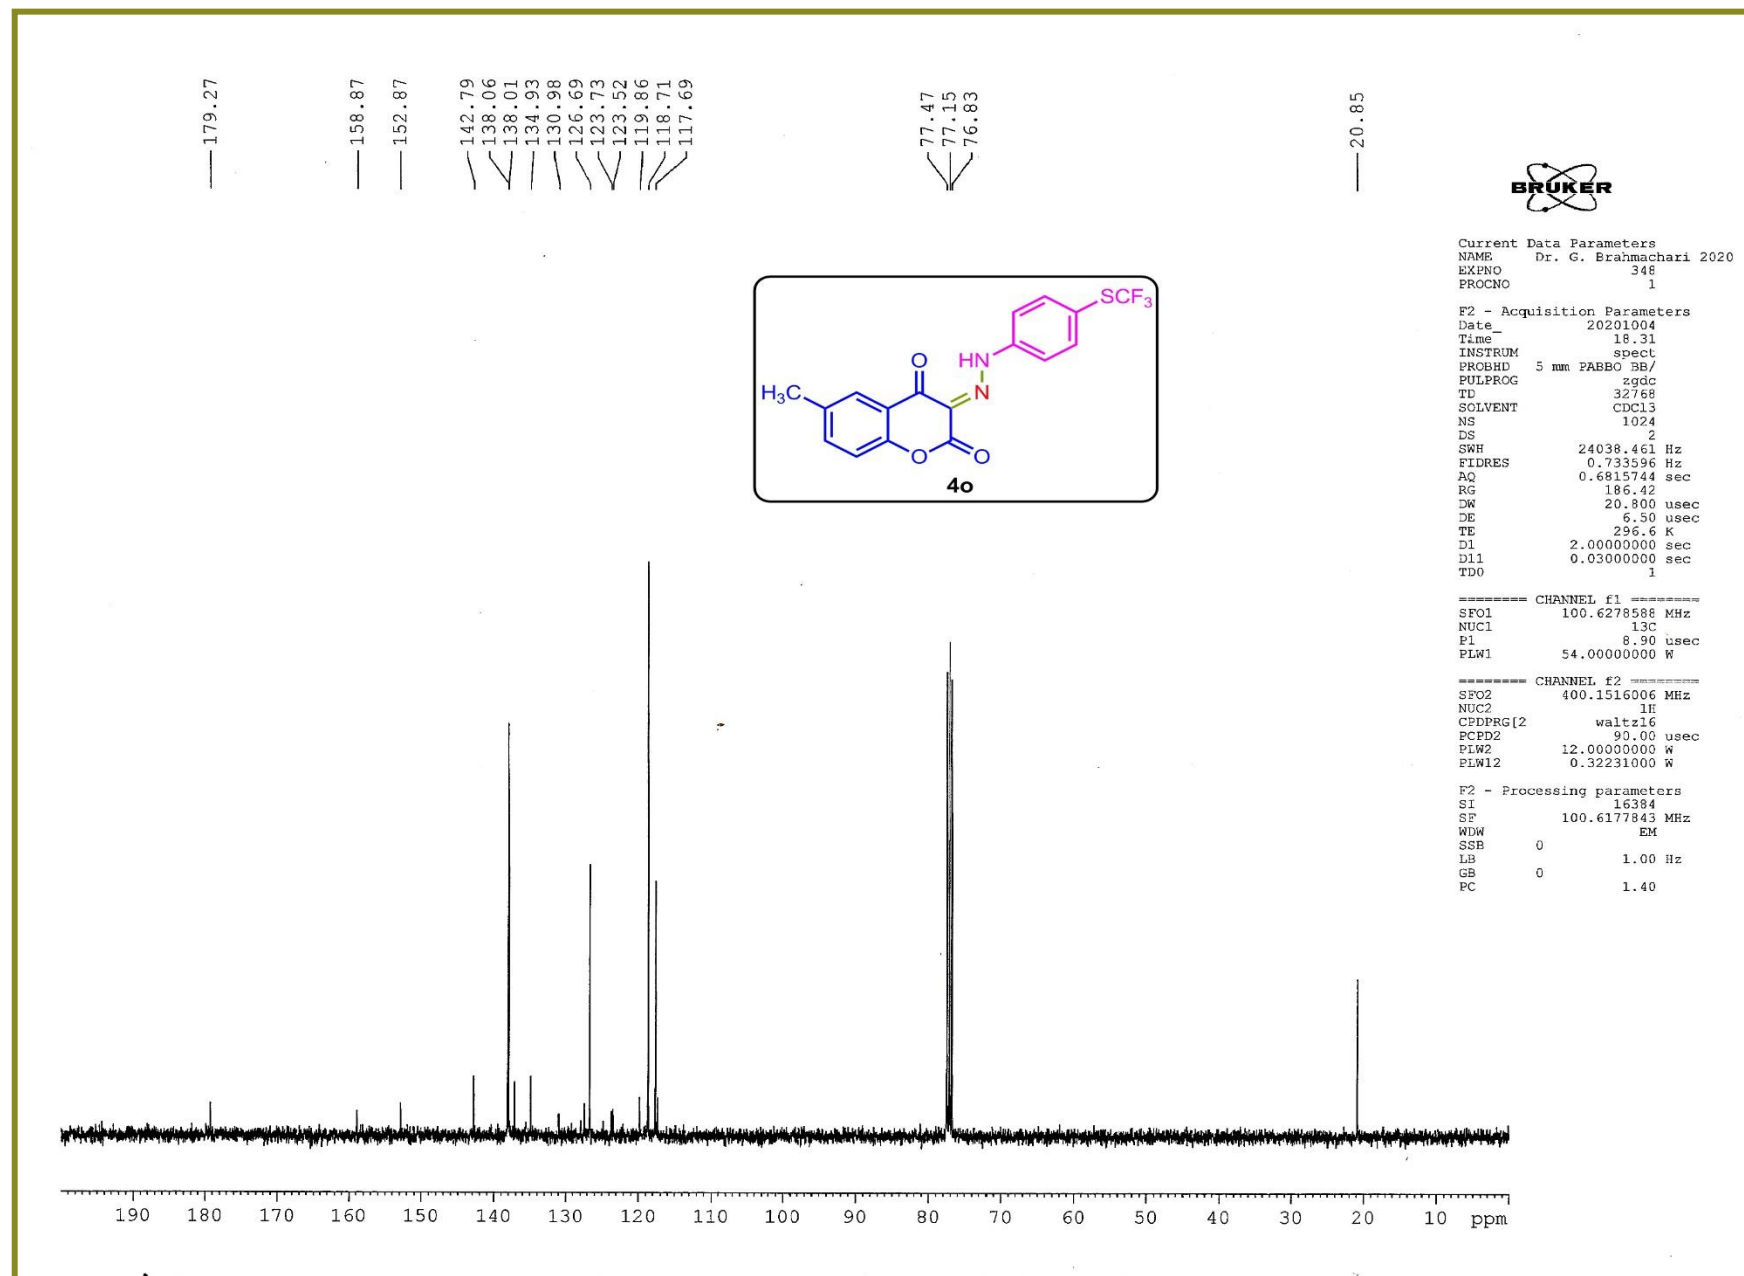

Figure S56. <sup>13</sup>C-NMR spectrum of (*E*)-6-methyl-3-(2-(4-((trifluoromethyl)thio)phenyl)hydrazineylidene)chromane-2,4-dione (**4o**)

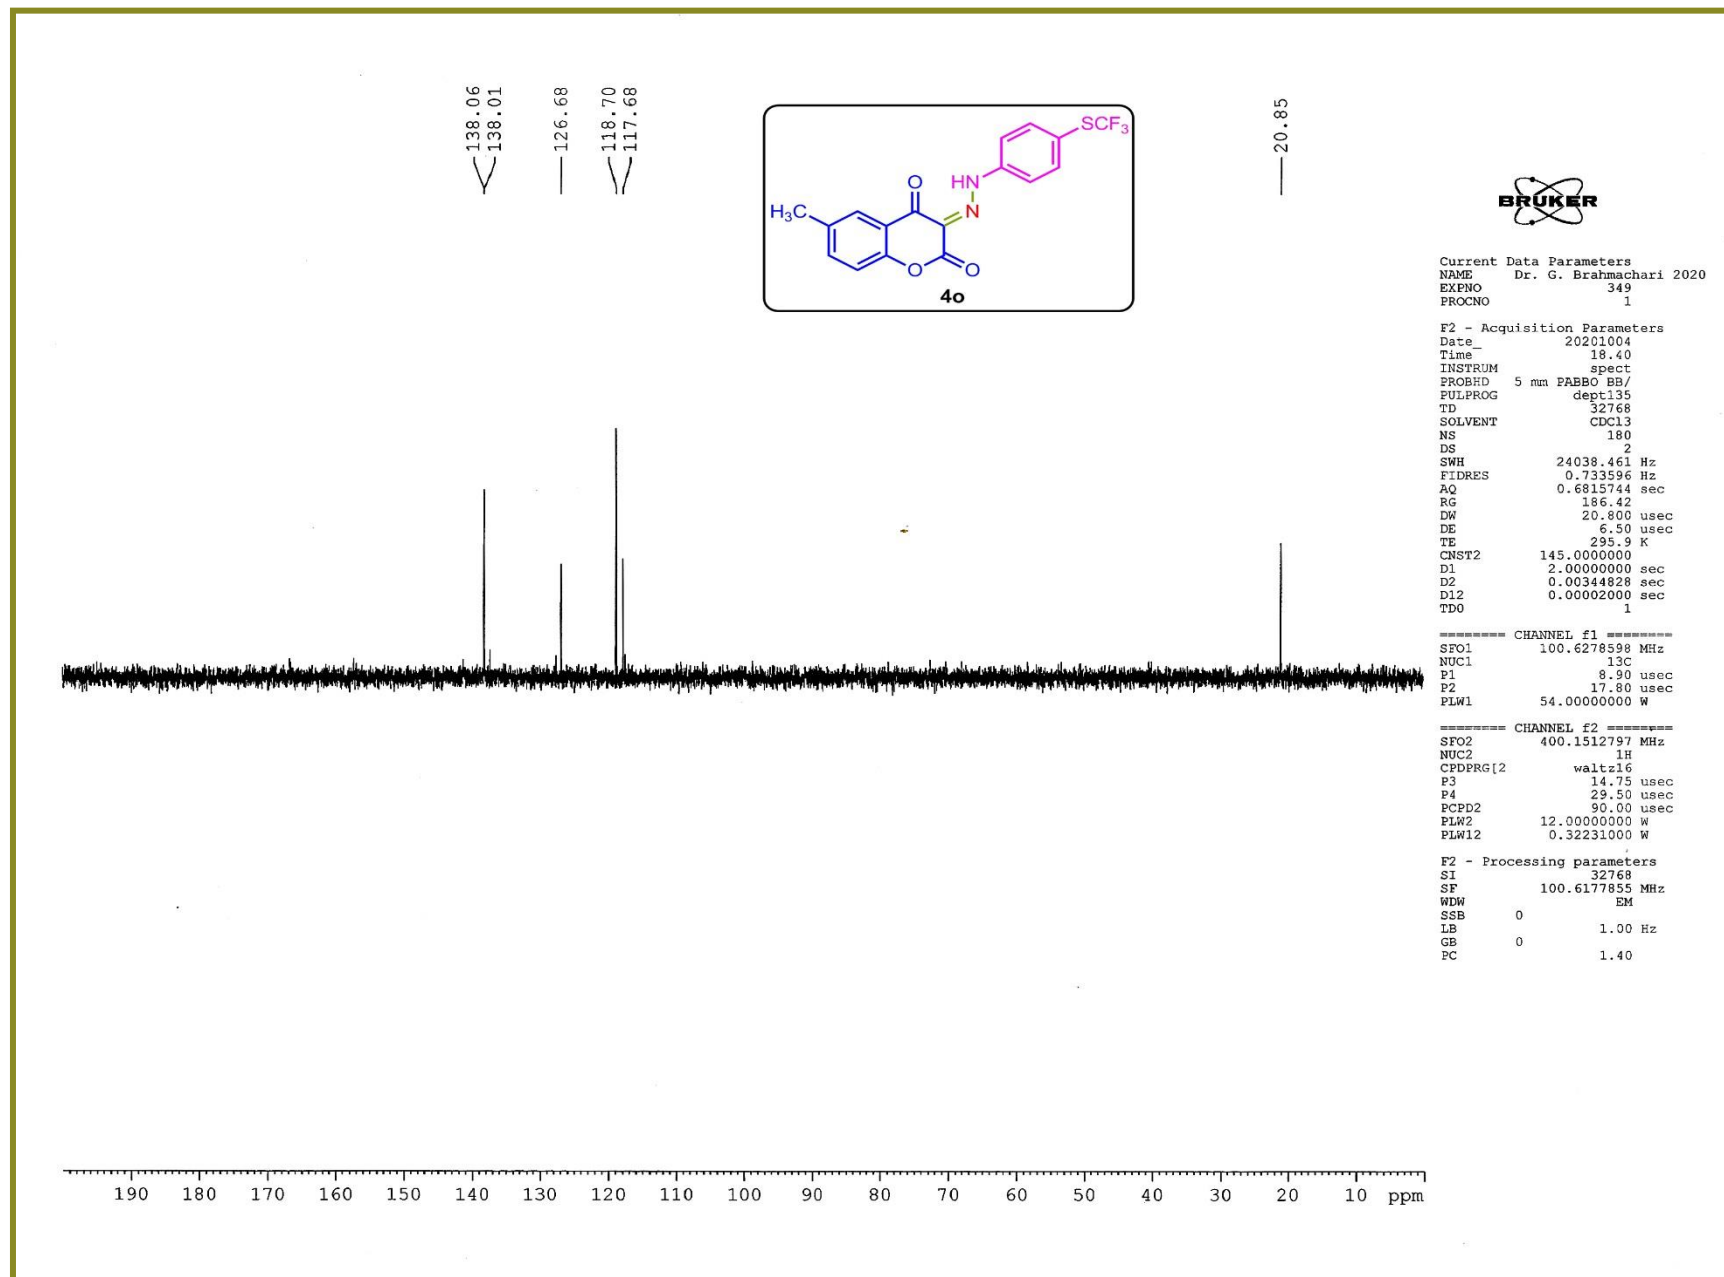

Figure S57. DEPT-135 NMR spectrum of (*E*)-6-methyl-3-(2-(4-((trifluoromethyl)thio)phenyl)hydrazineylidene)chromane-2,4-dione (**4o**)

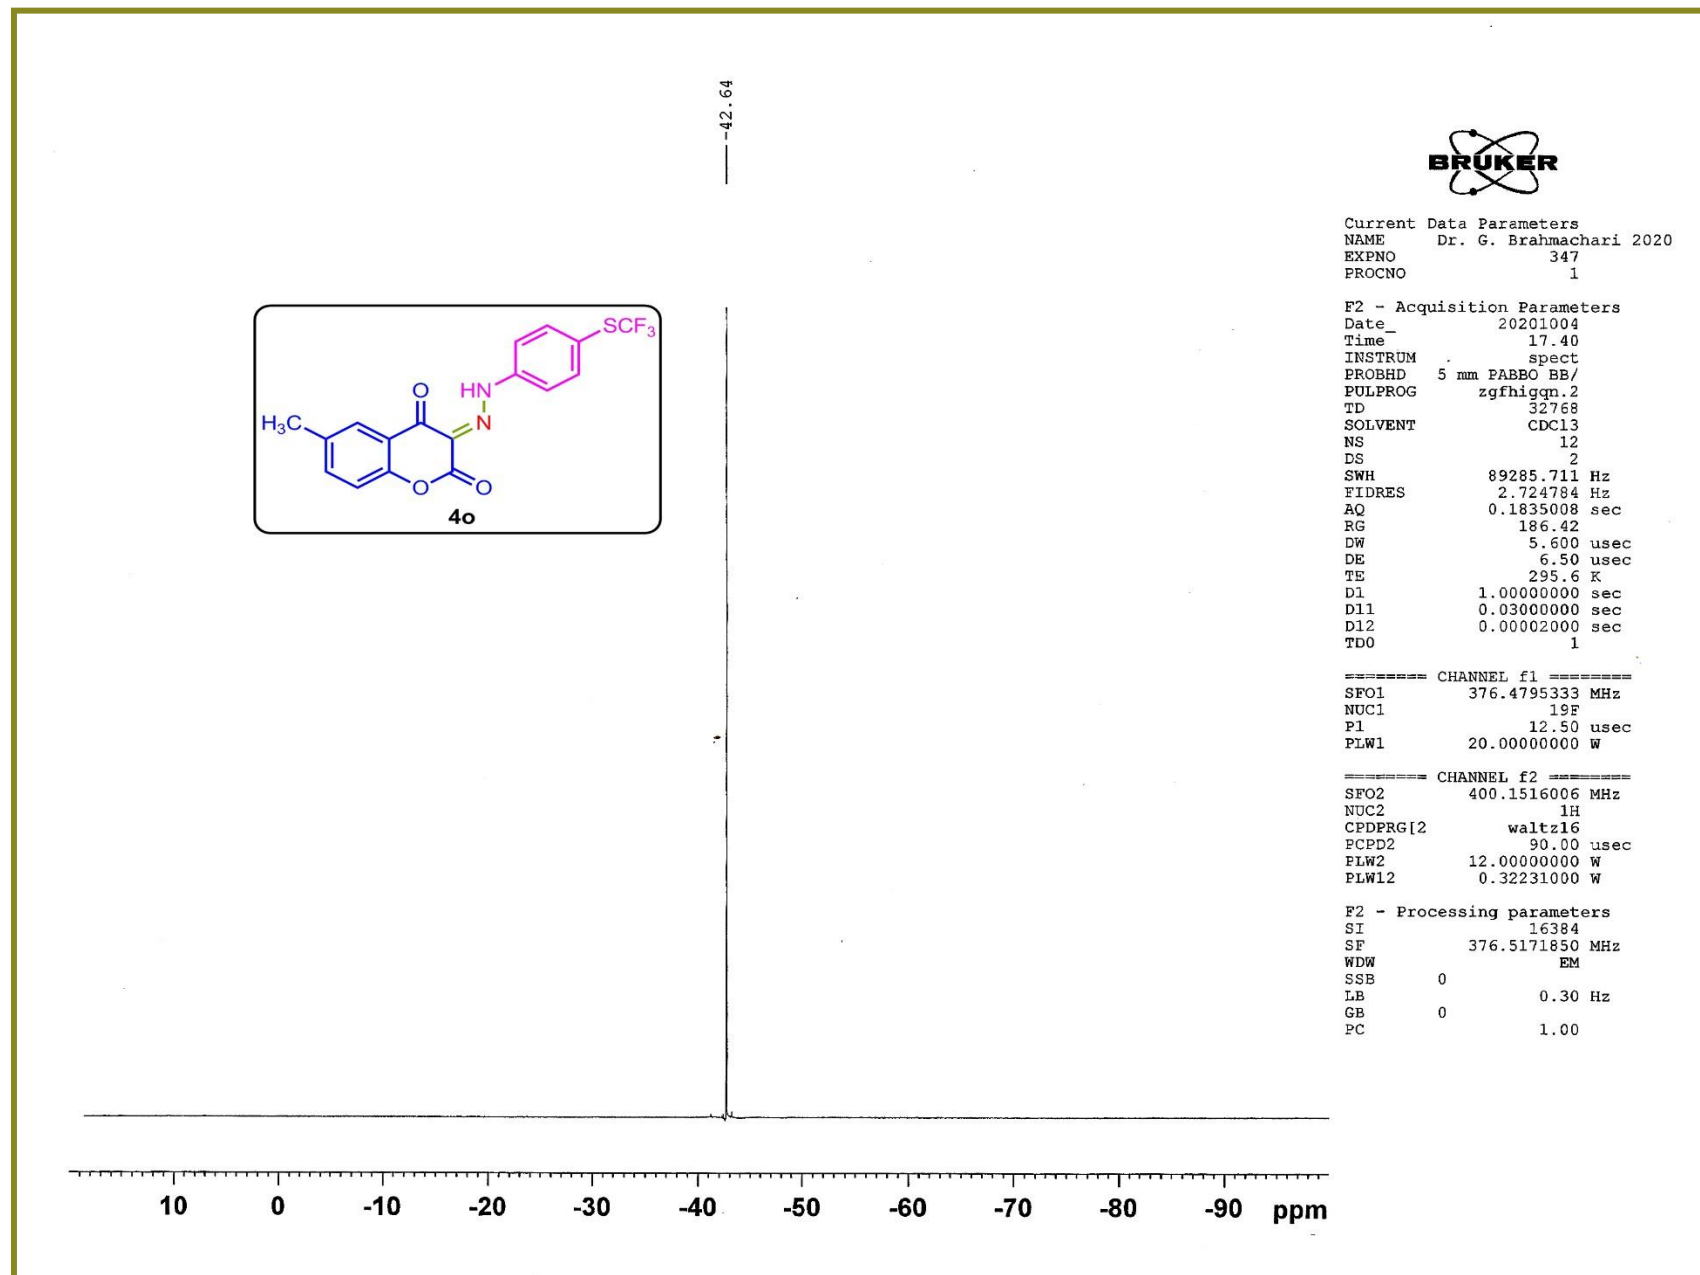

Figure S58.  $^{19}\text{F}$  NMR spectrum of (*E*)-6-methyl-3-(2-(4-((trifluoromethyl)thio)phenyl)hydrazineylidene)chromane-2,4-dione (**4o**)



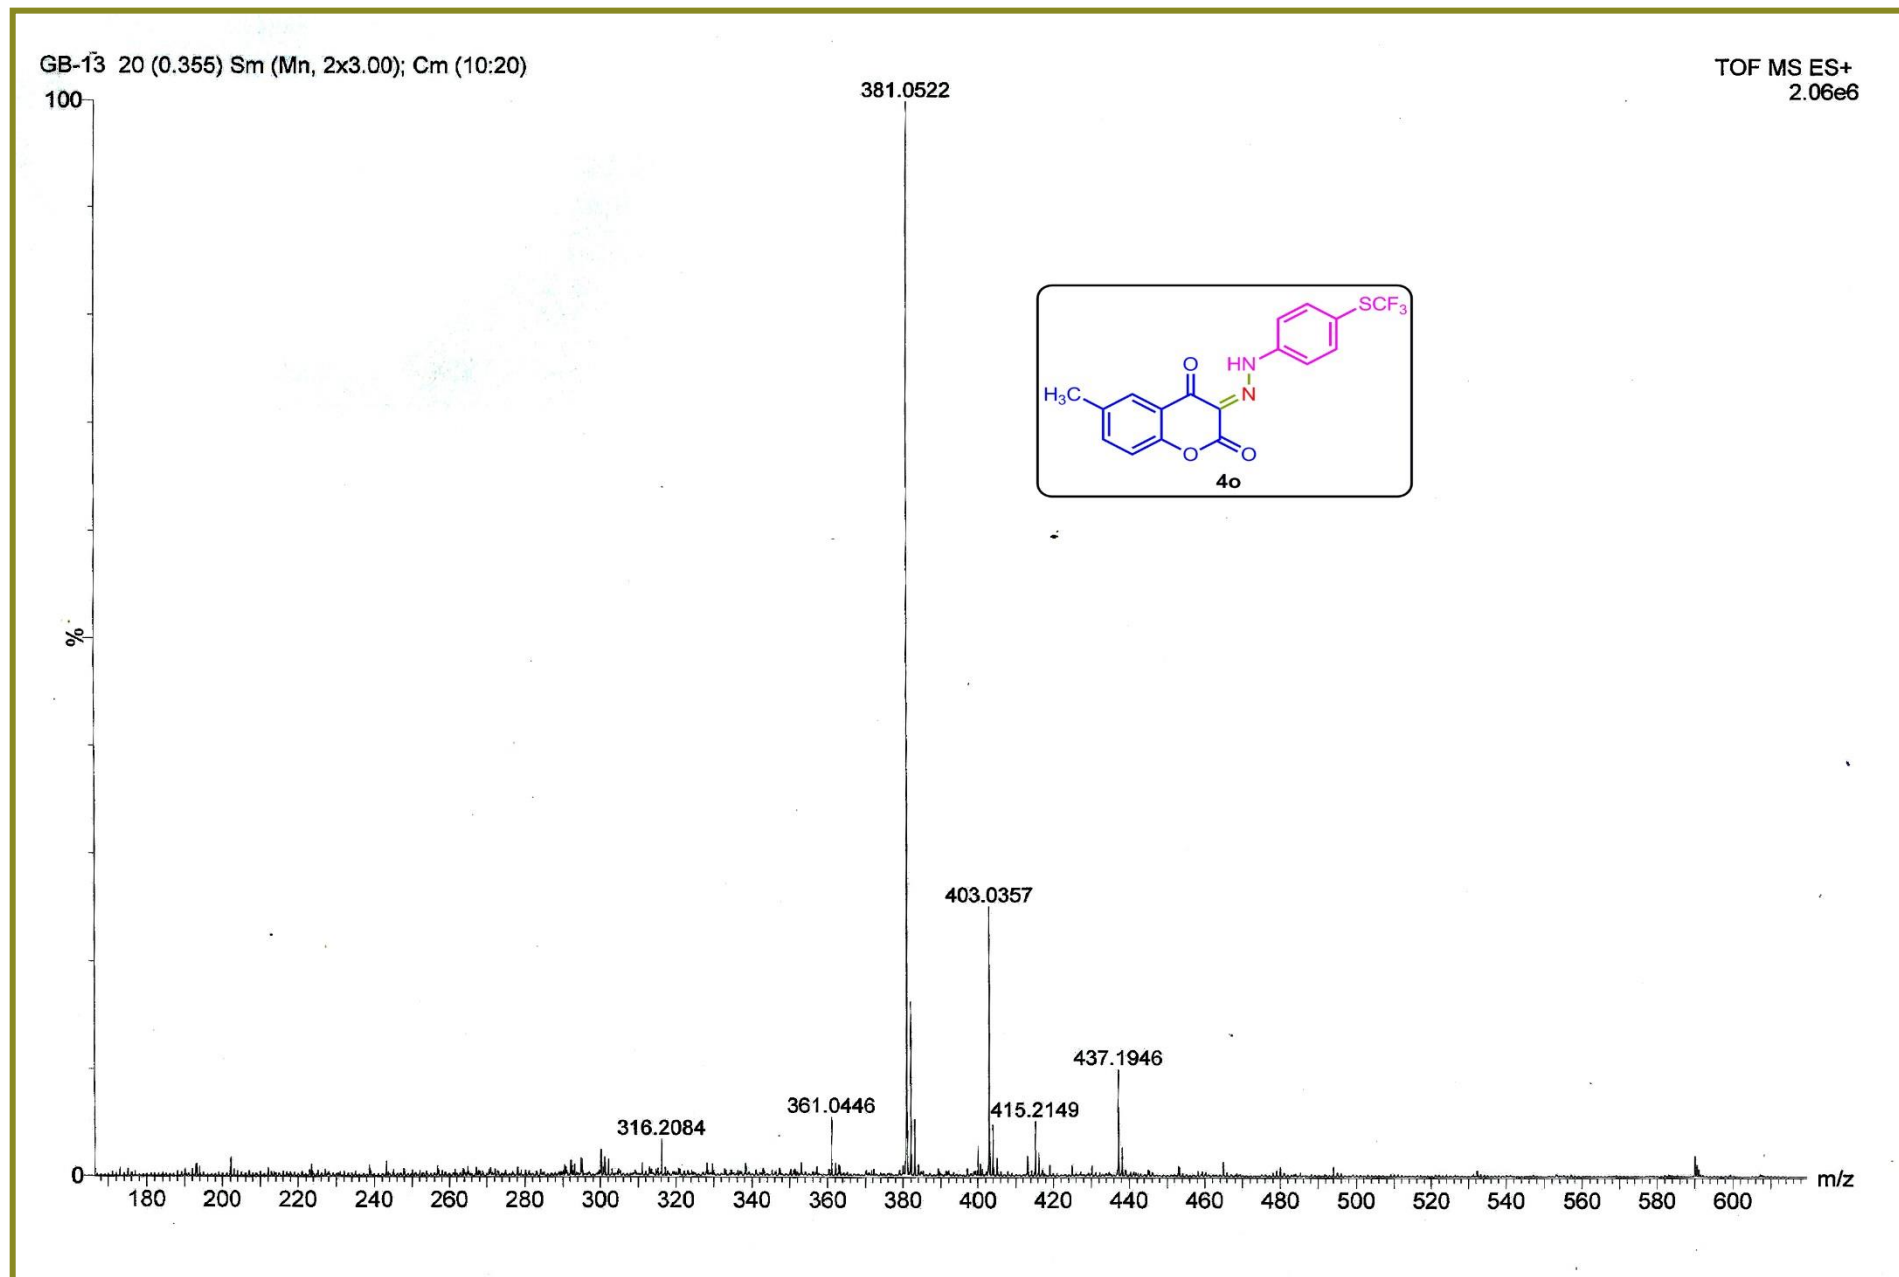

Figure S59. Mass spectra of (*E*)-6-methyl-3-(2-(4-((trifluoromethyl)thio)phenyl)hydrazineylidene)chromane-2,4-dione (**4o**)

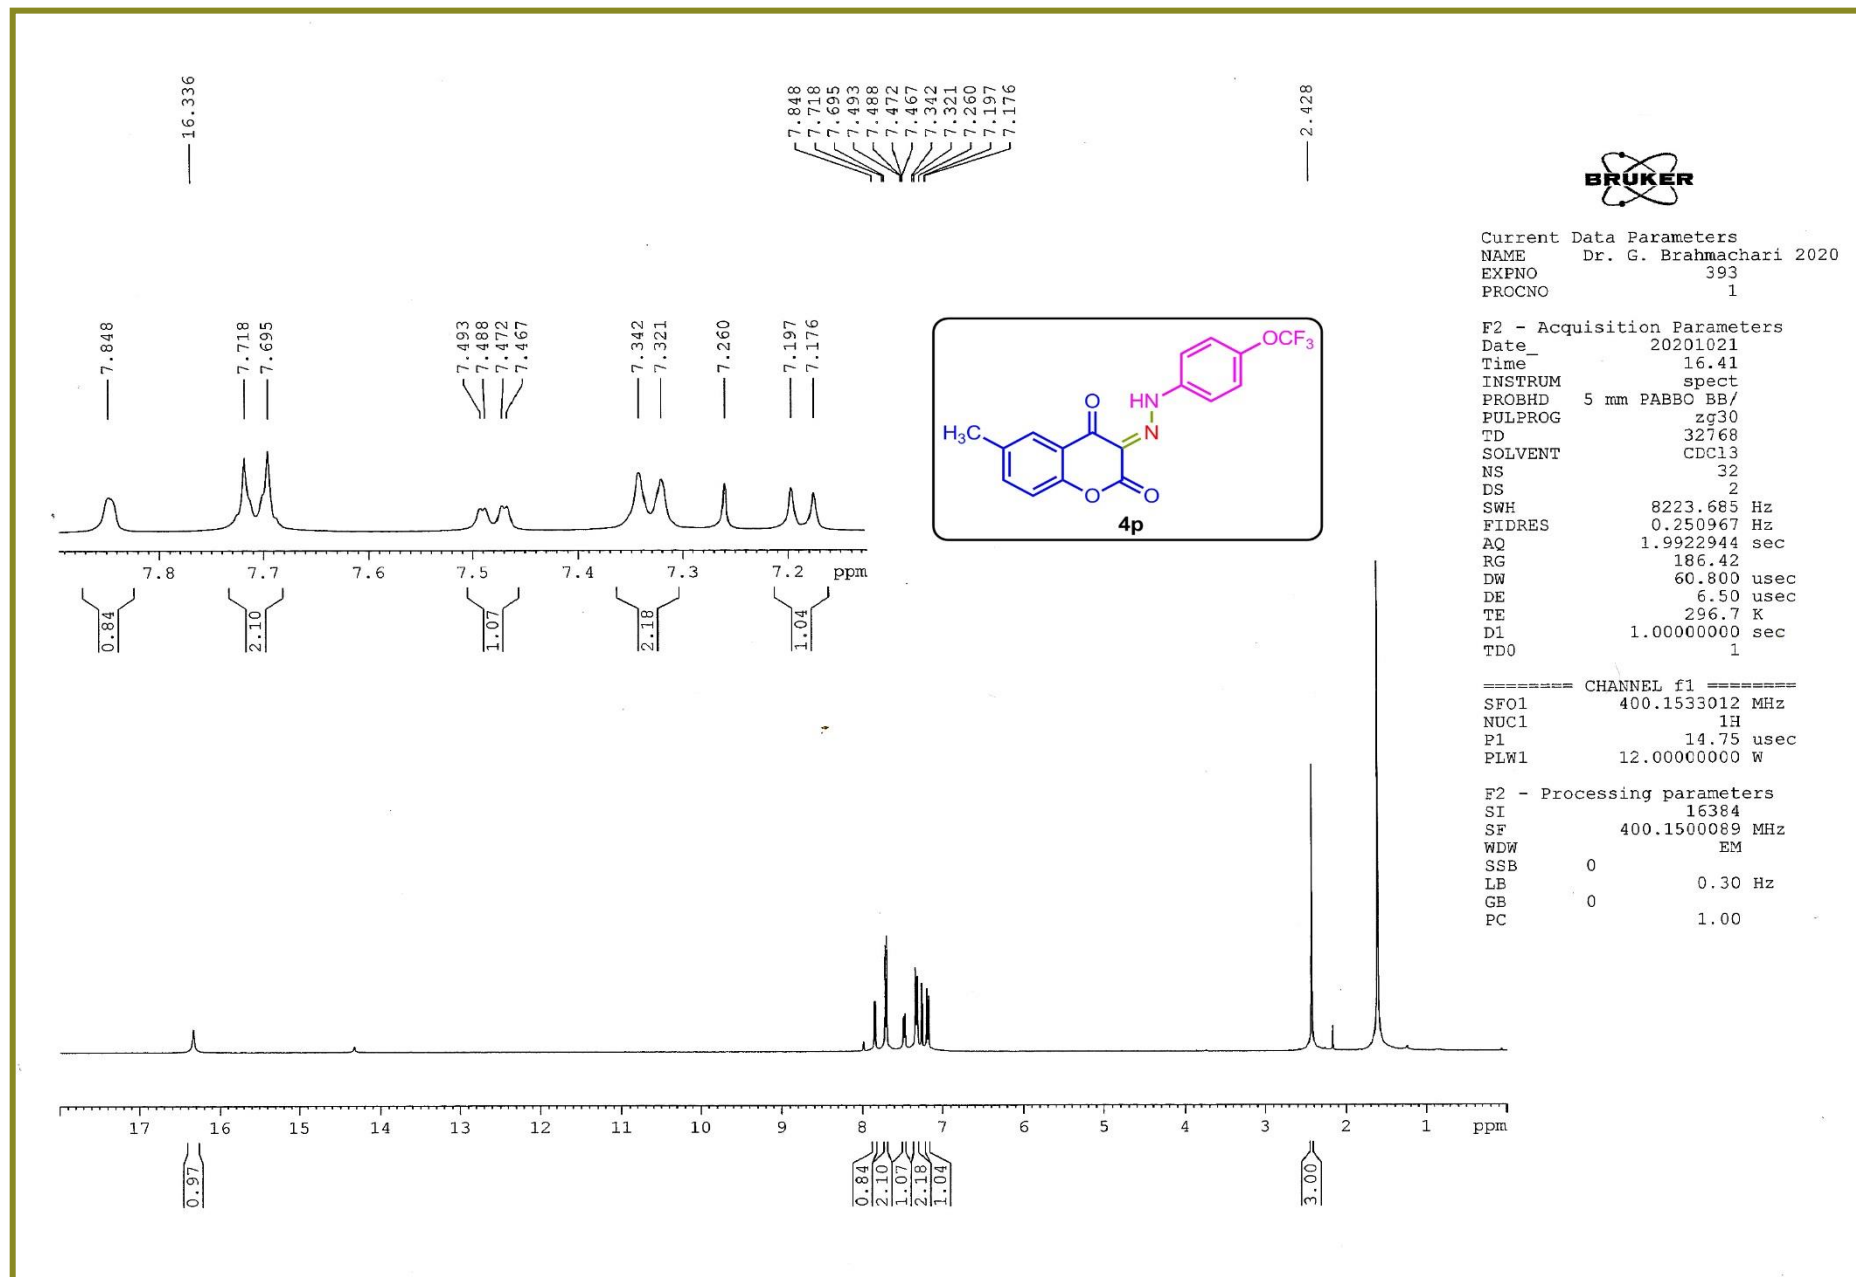

Figure S60. <sup>1</sup>H-NMR spectrum of (*E*)-6-methyl-3-(2-(4-(trifluoromethoxy)phenyl)hydrazineylidene)chromane-2,4-dione (**4p**)

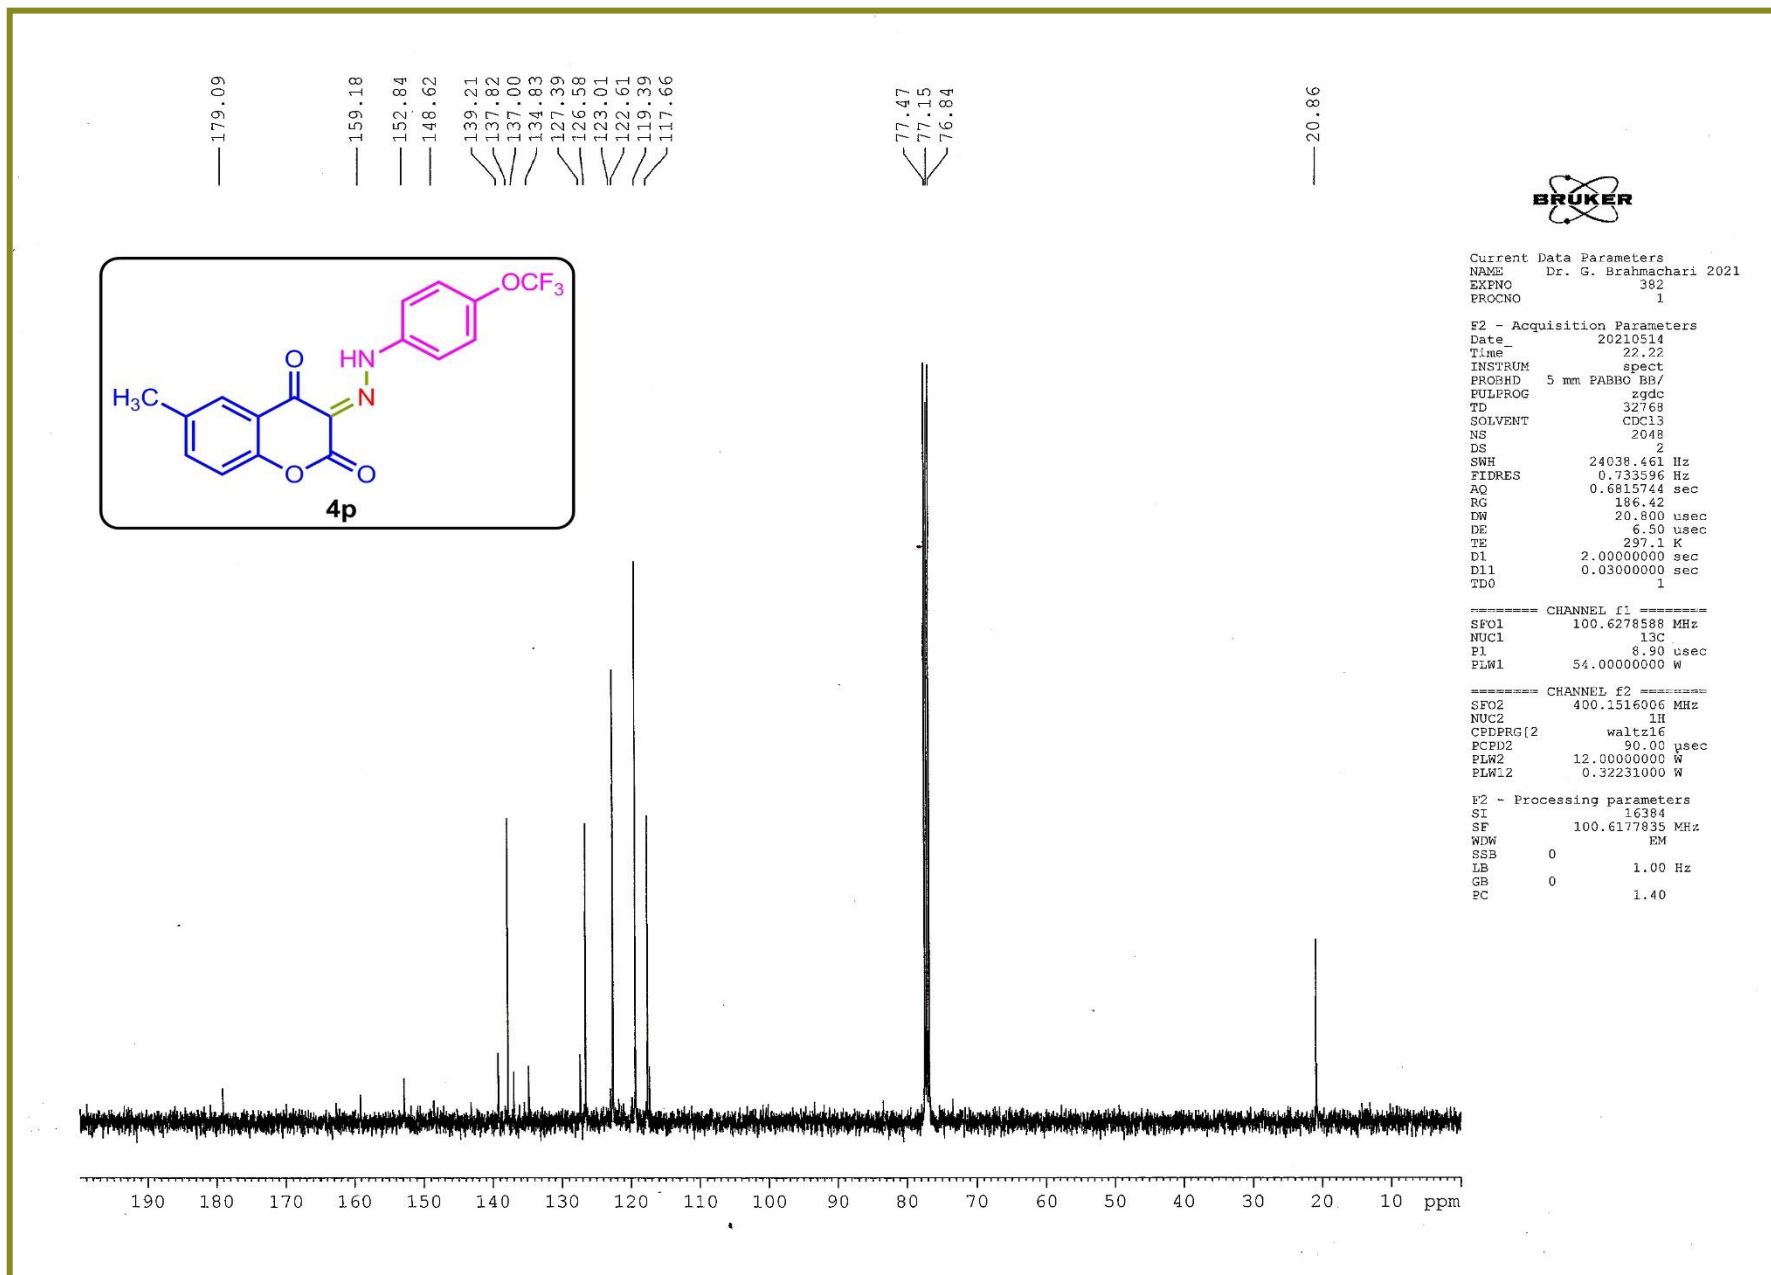

Figure S61. <sup>13</sup>C-NMR spectrum of (*E*)-6-methyl-3-(2-(4-(trifluoromethoxy)phenyl)hydrazineylidene)chromane-2,4-dione (**4p**)

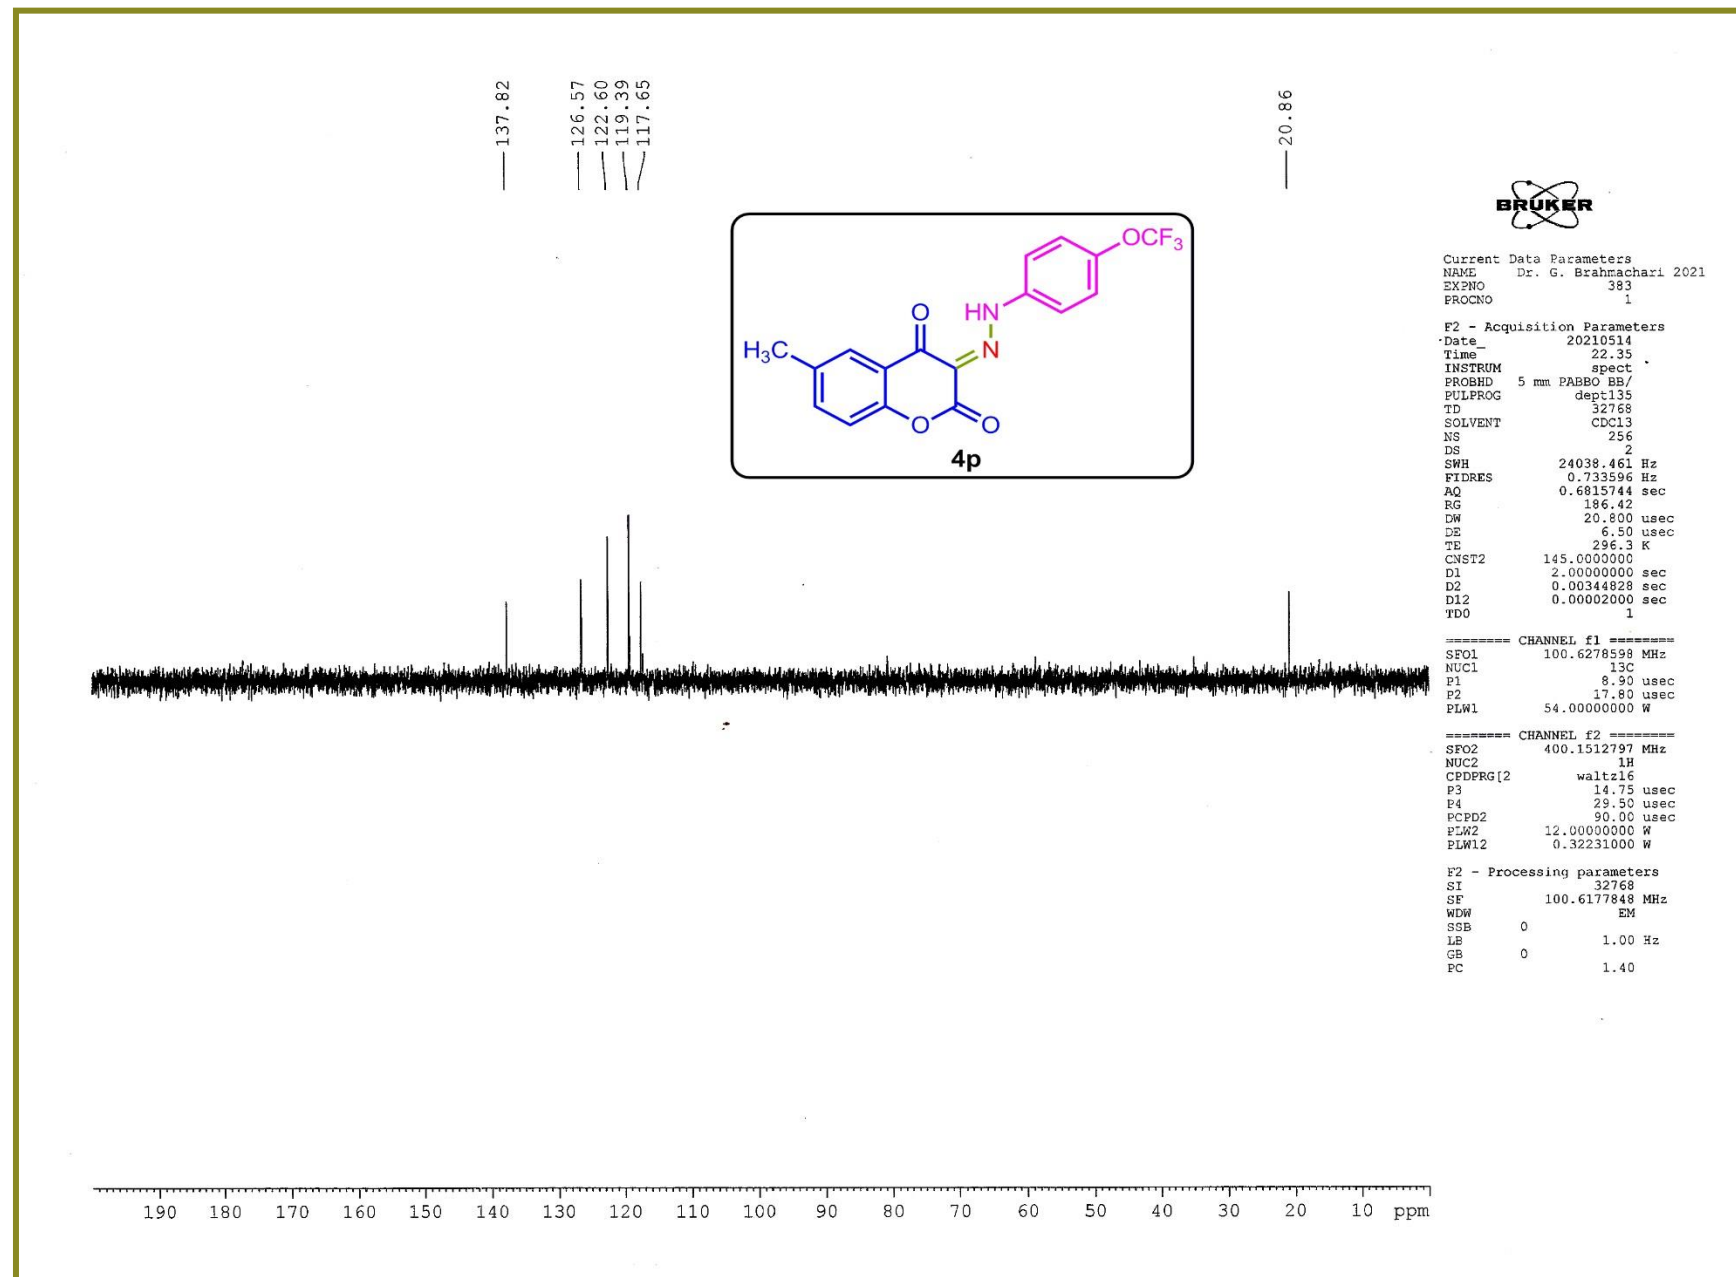

Figure S62. DEPT-135 NMR spectrum of (*E*)-6-methyl-3-(2-(4-(trifluoromethoxy)phenyl)hydrazineylidene)chromane-2,4-dione (**4p**)

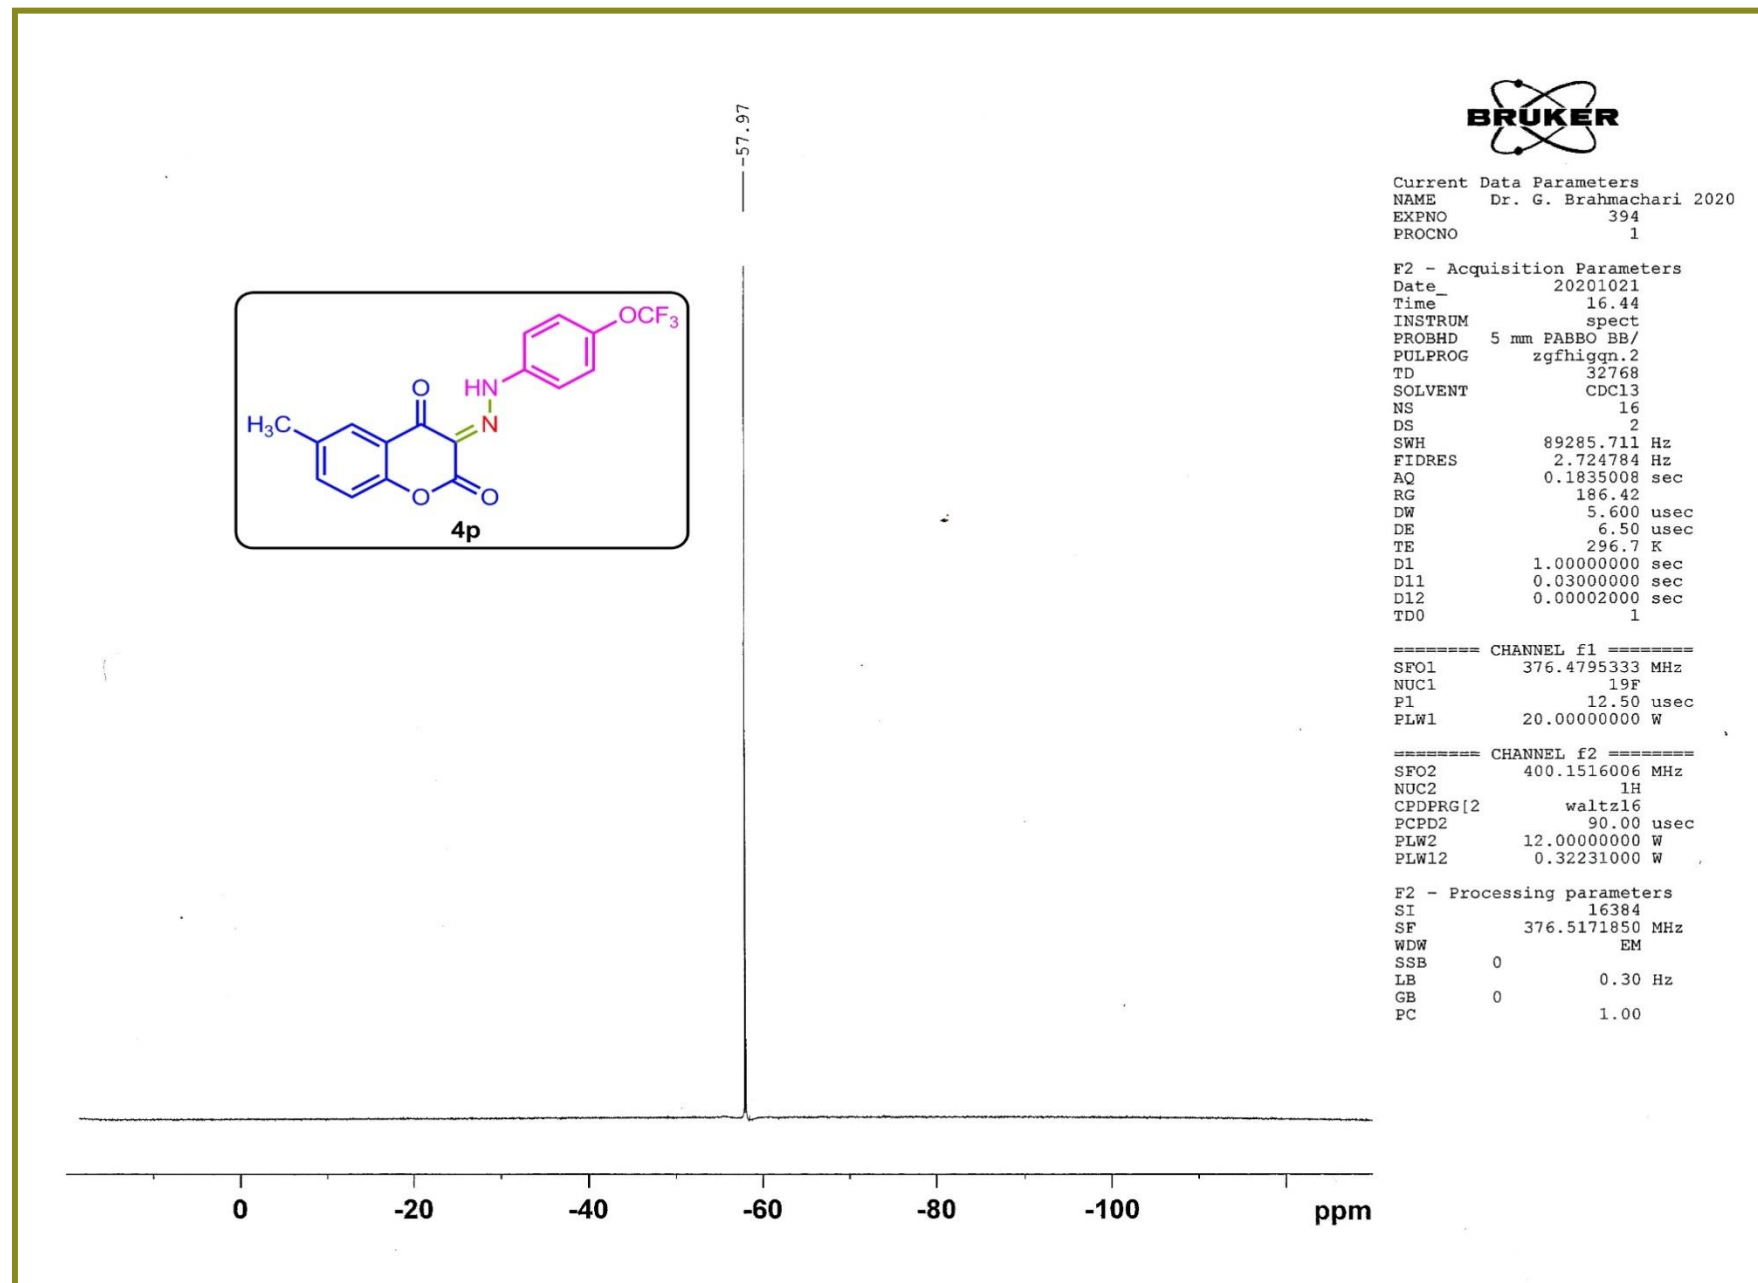

Figure S63. <sup>19</sup>F NMR spectrum of (*E*)-6-methyl-3-(2-(4-(trifluoromethoxy)phenyl)hydrazineylidene)chromane-2,4-dione (**4p**)

GB-54 5 (0.101) Sm (Mn, 2x3.00); Cm (2:7)

TOF MS ES+  
9.83e4

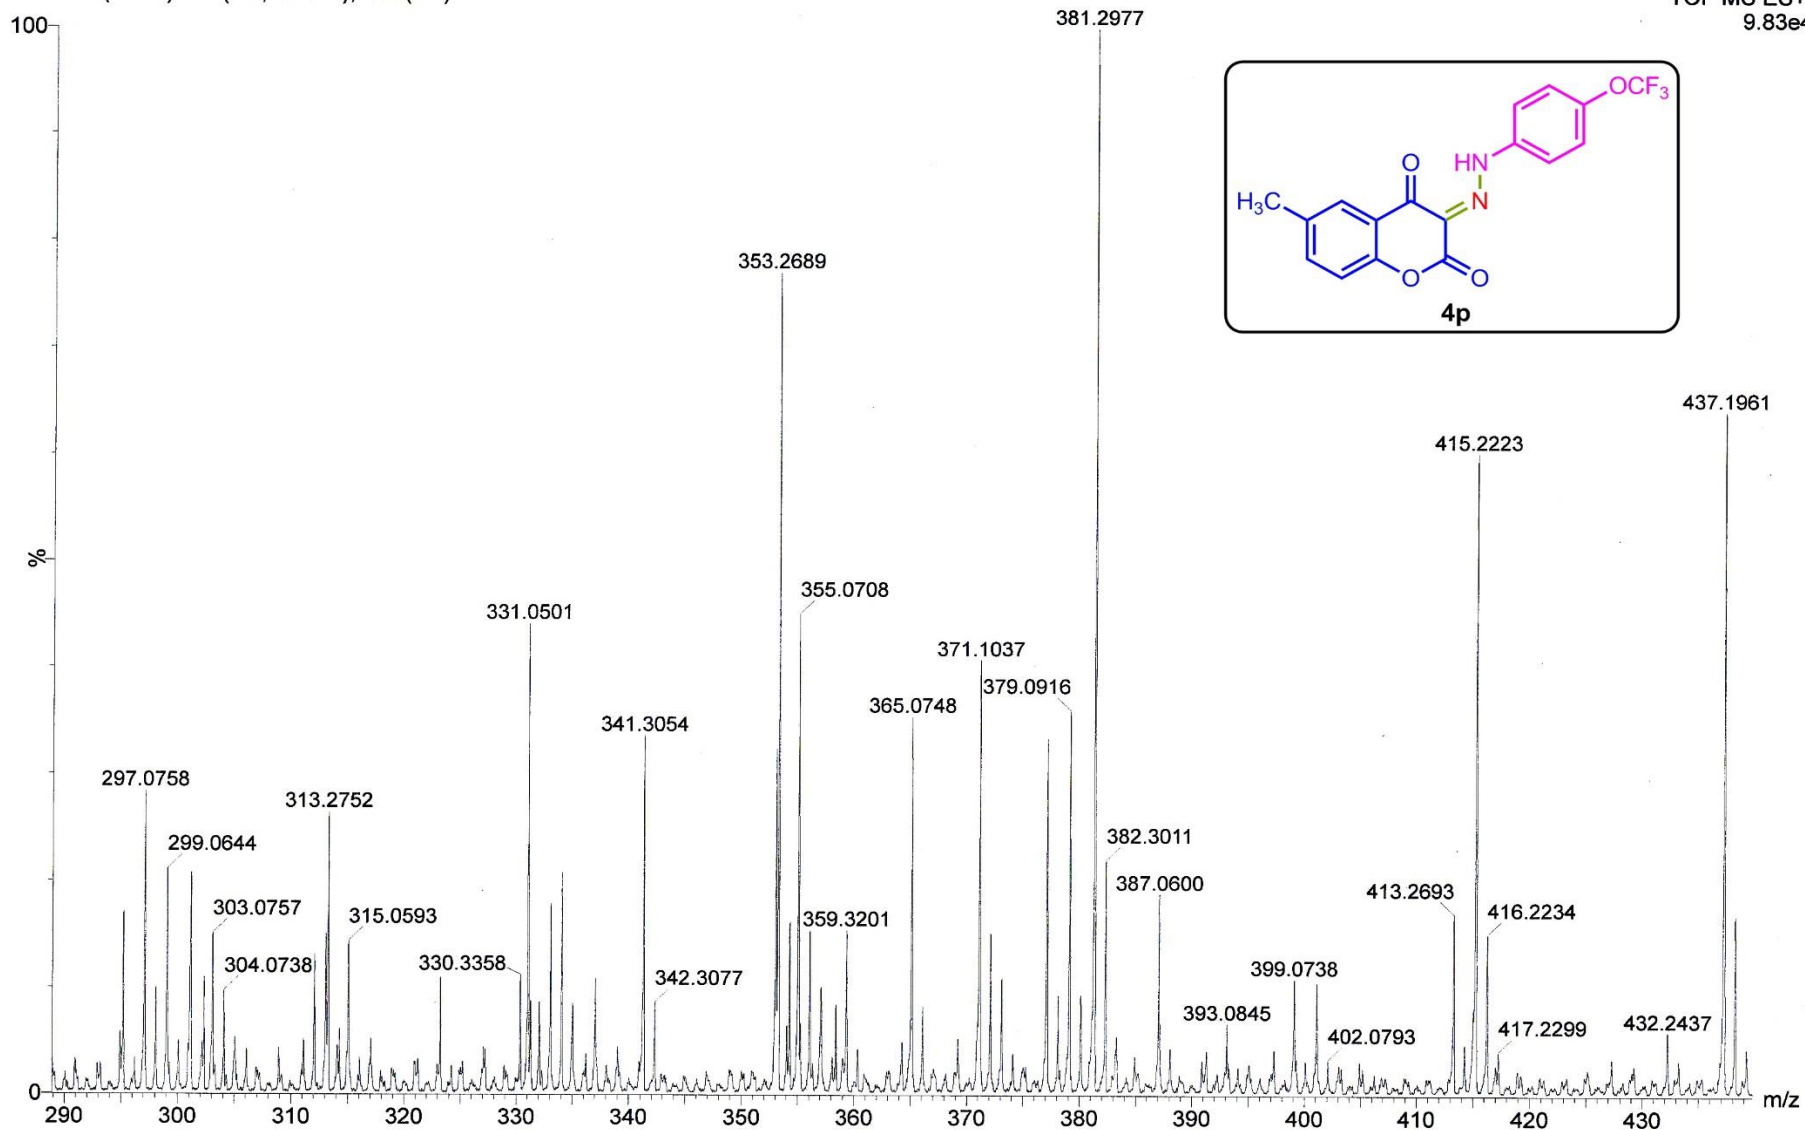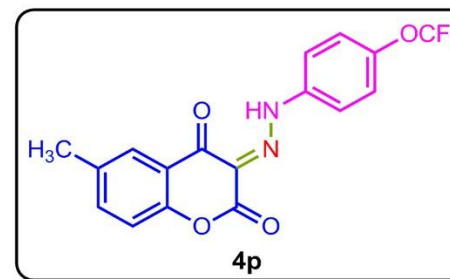

Figure S64. Mass spectra of (*E*)-6-methyl-3-(2-(4-(trifluoromethoxy)phenyl)hydrazineylidene)chromane-2,4-dione (**4p**)

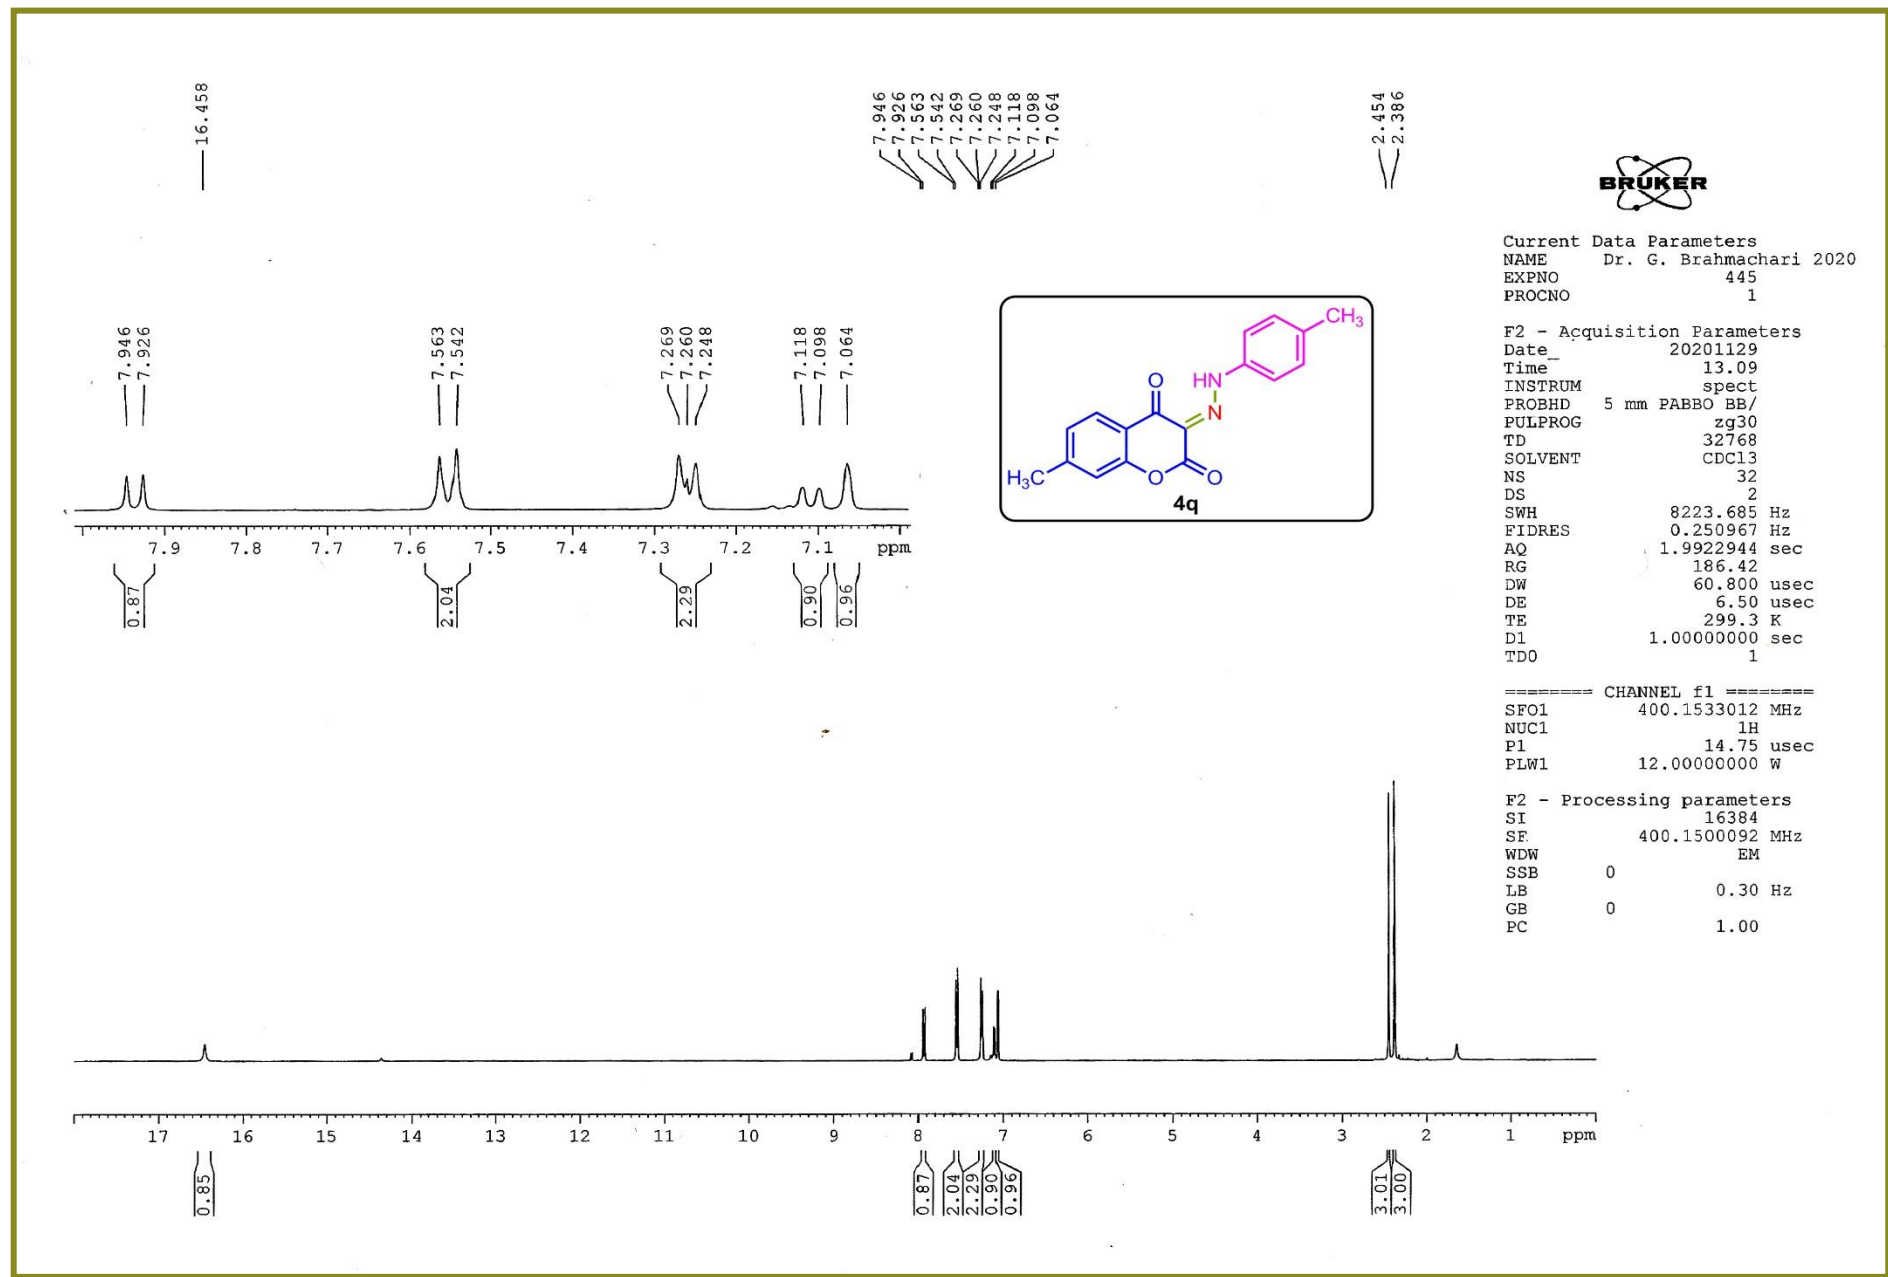

Figure S65. <sup>1</sup>H-NMR spectrum of (*E*)-7-methyl-3-(2-(*p*-tolyl)hydrazineylidene)chromane-2,4-dione (**4q**)

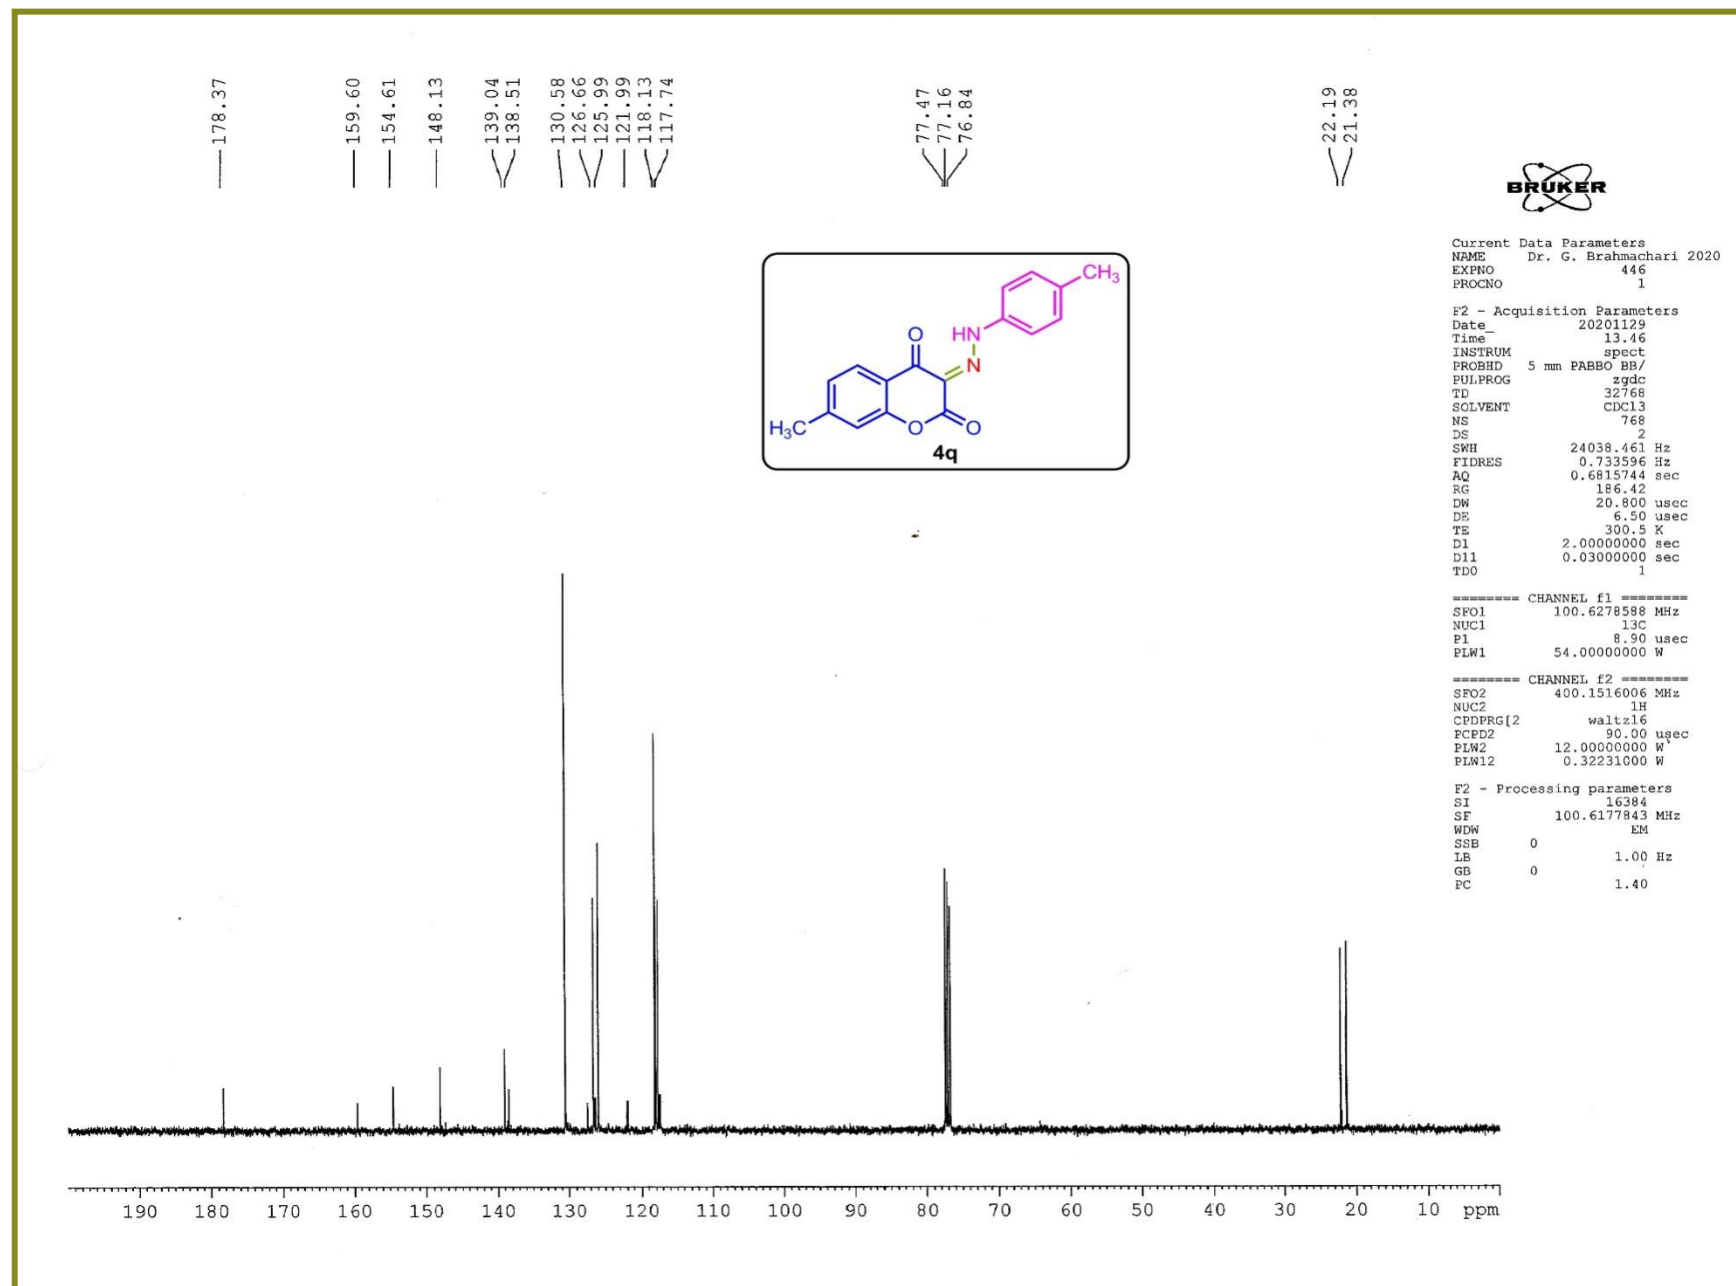

Figure S66. <sup>13</sup>C-NMR spectrum of (*E*)-7-methyl-3-(2-(*p*-tolyl)hydrazineylidene)chromane-2,4-dione (**4q**)



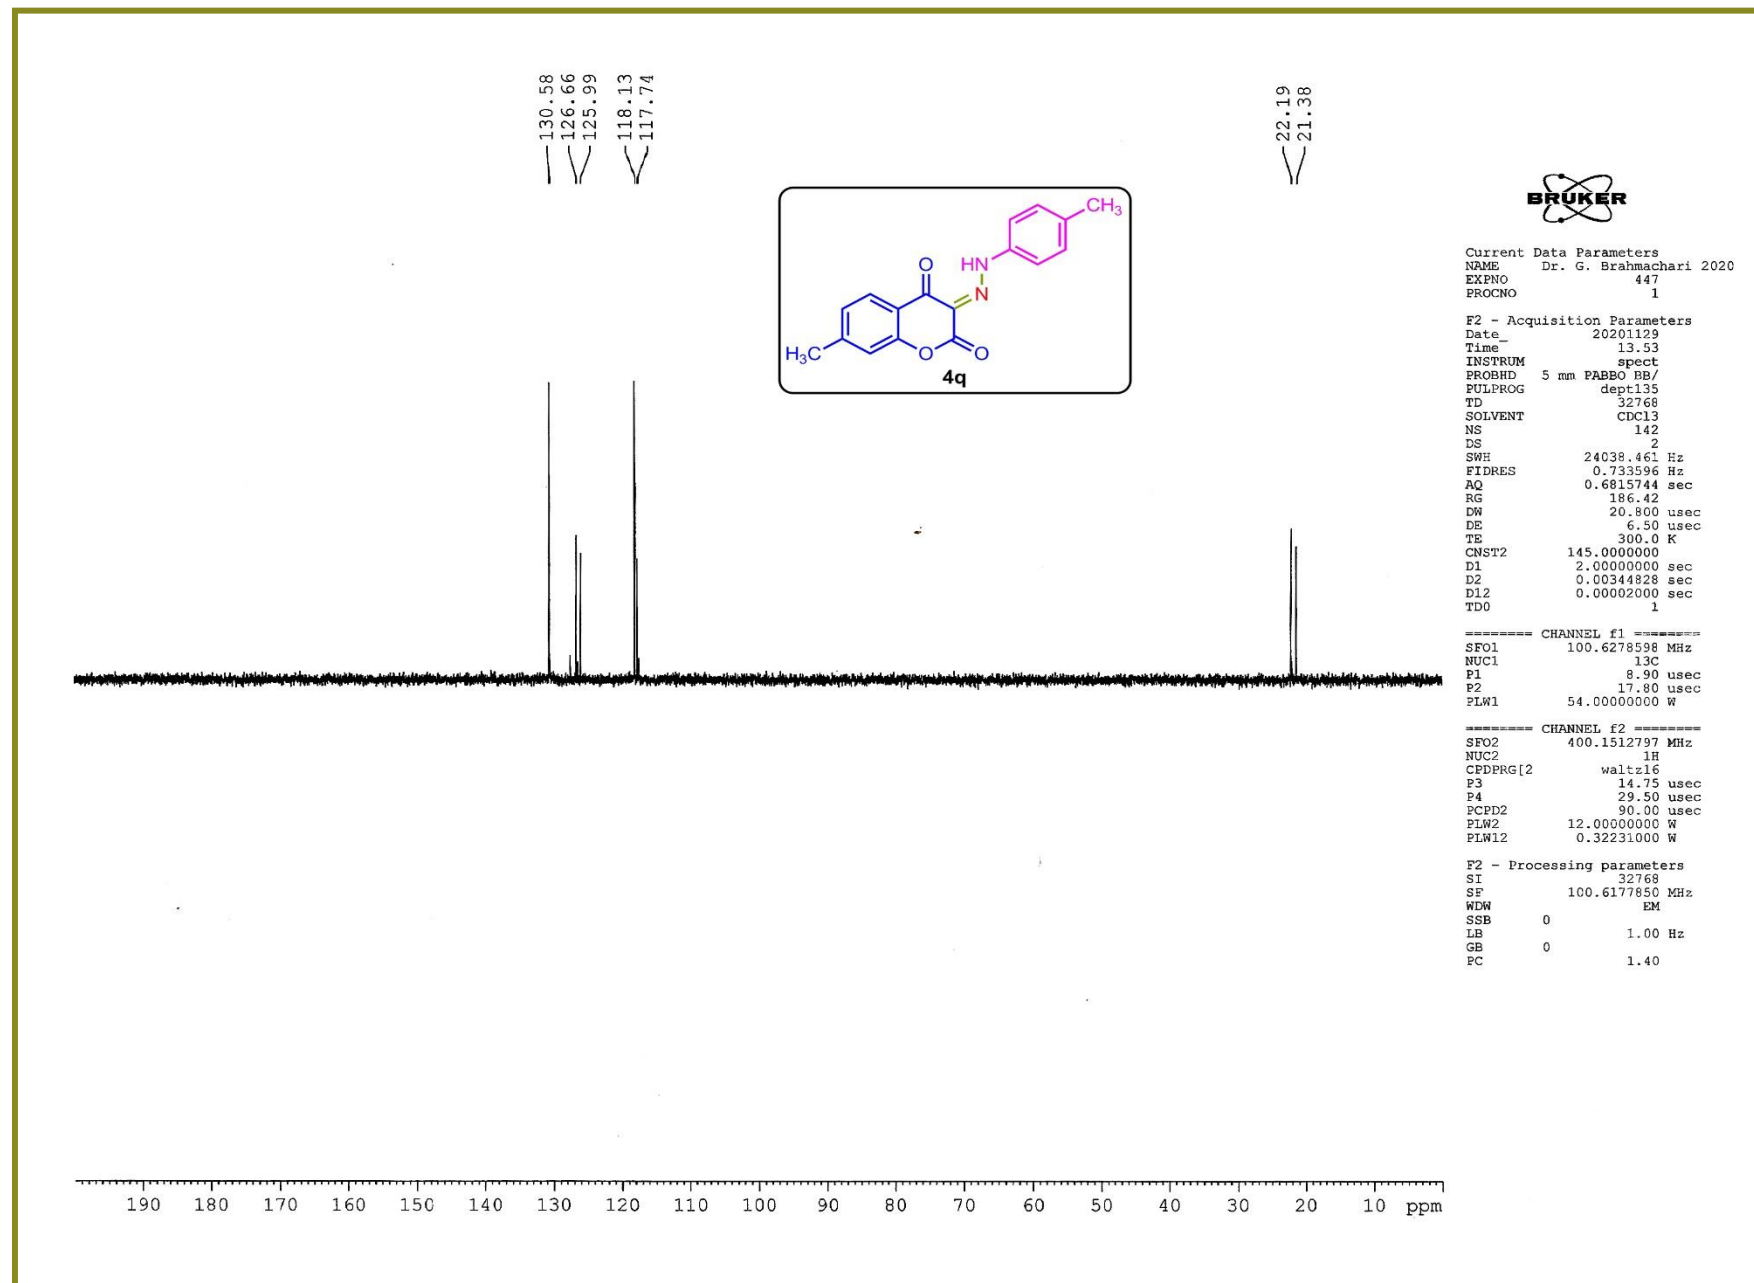

Figure S67. DEPT-135 NMR spectrum of (*E*)-7-methyl-3-(2-(*p*-tolyl)hydrazineylidene)chromane-2,4-dione (**4q**)

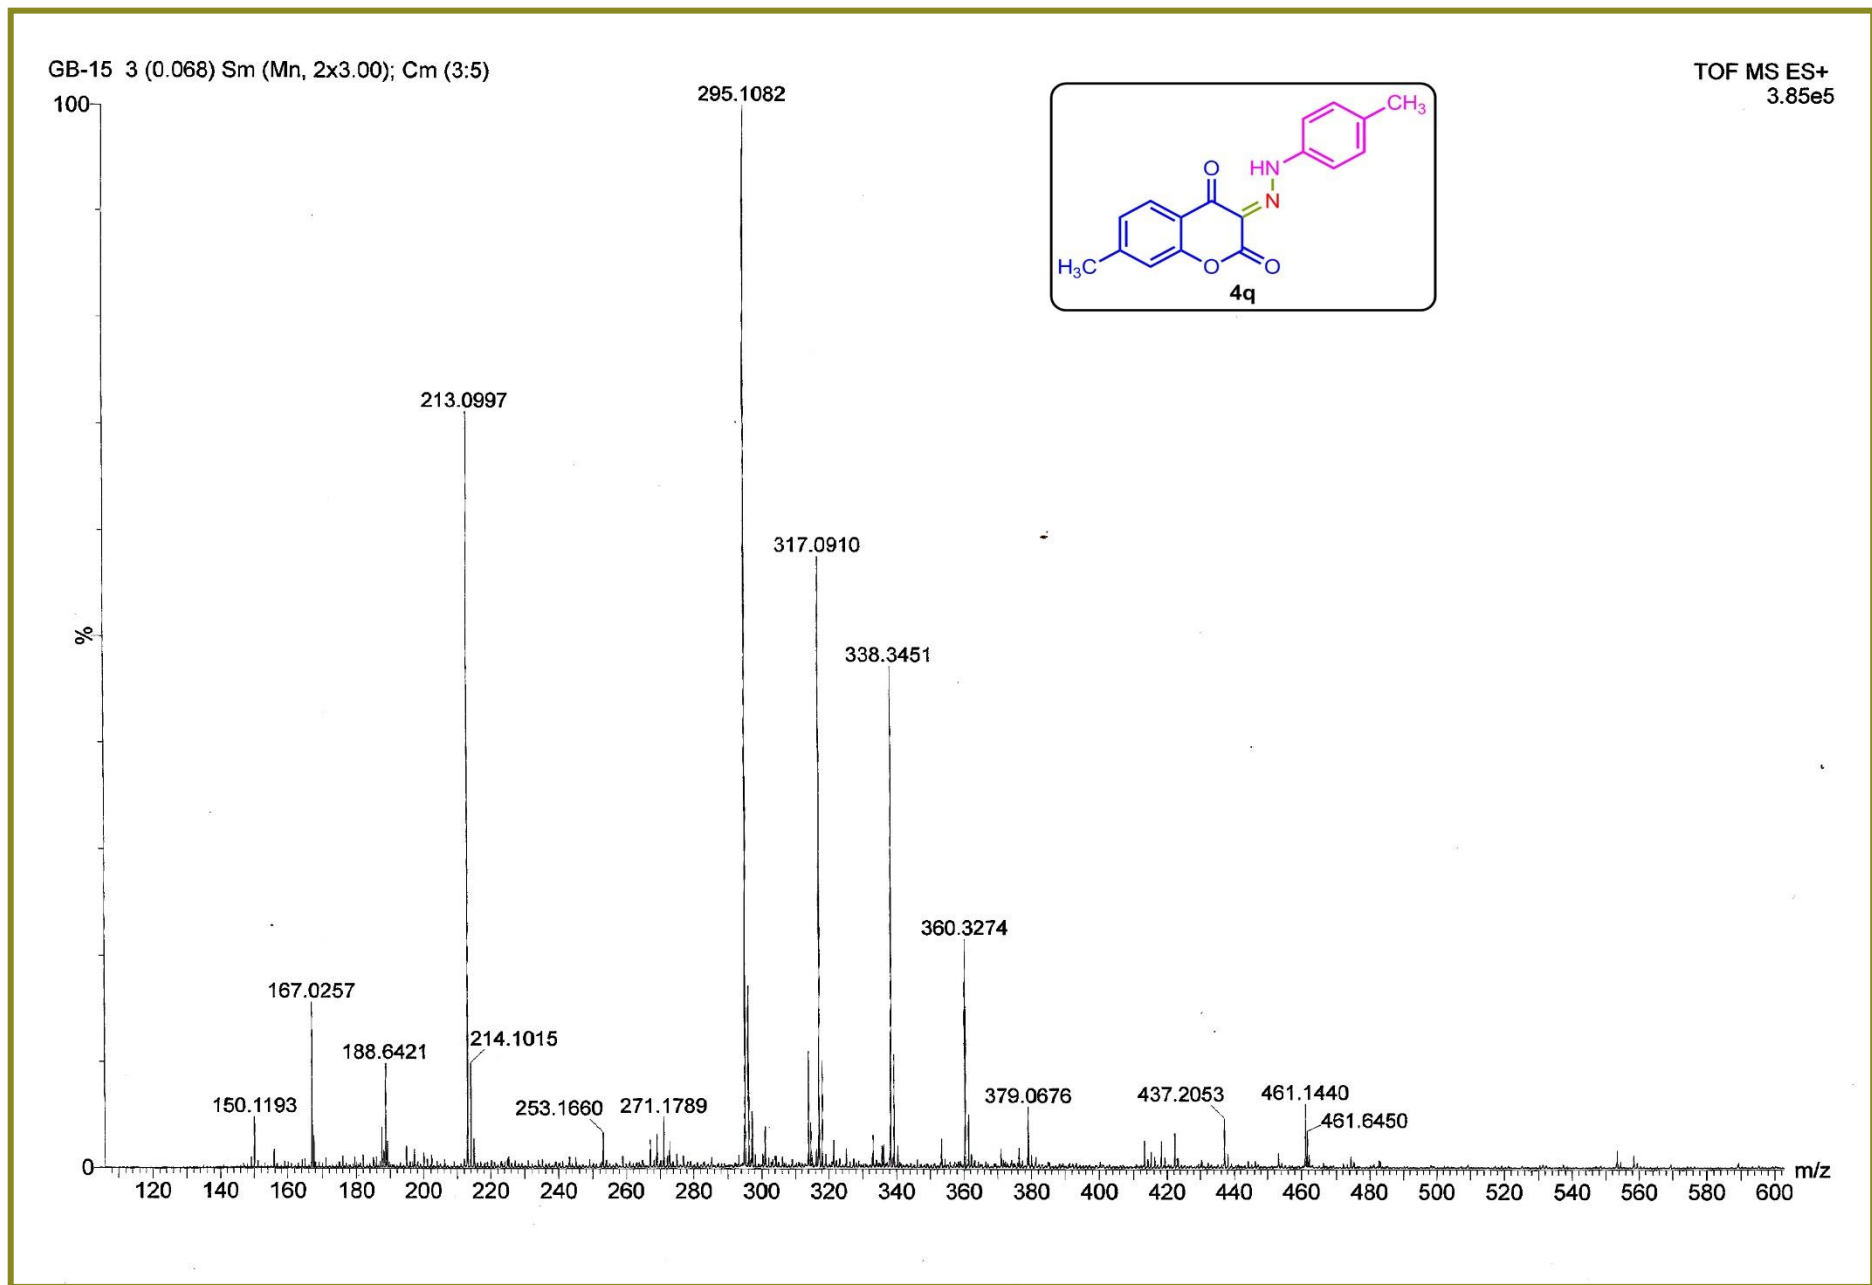

Figure S68. Mass spectra of (*E*)-7-methyl-3-(2-(*p*-tolyl)hydrazineylidene)chromane-2,4-dione (**4q**)

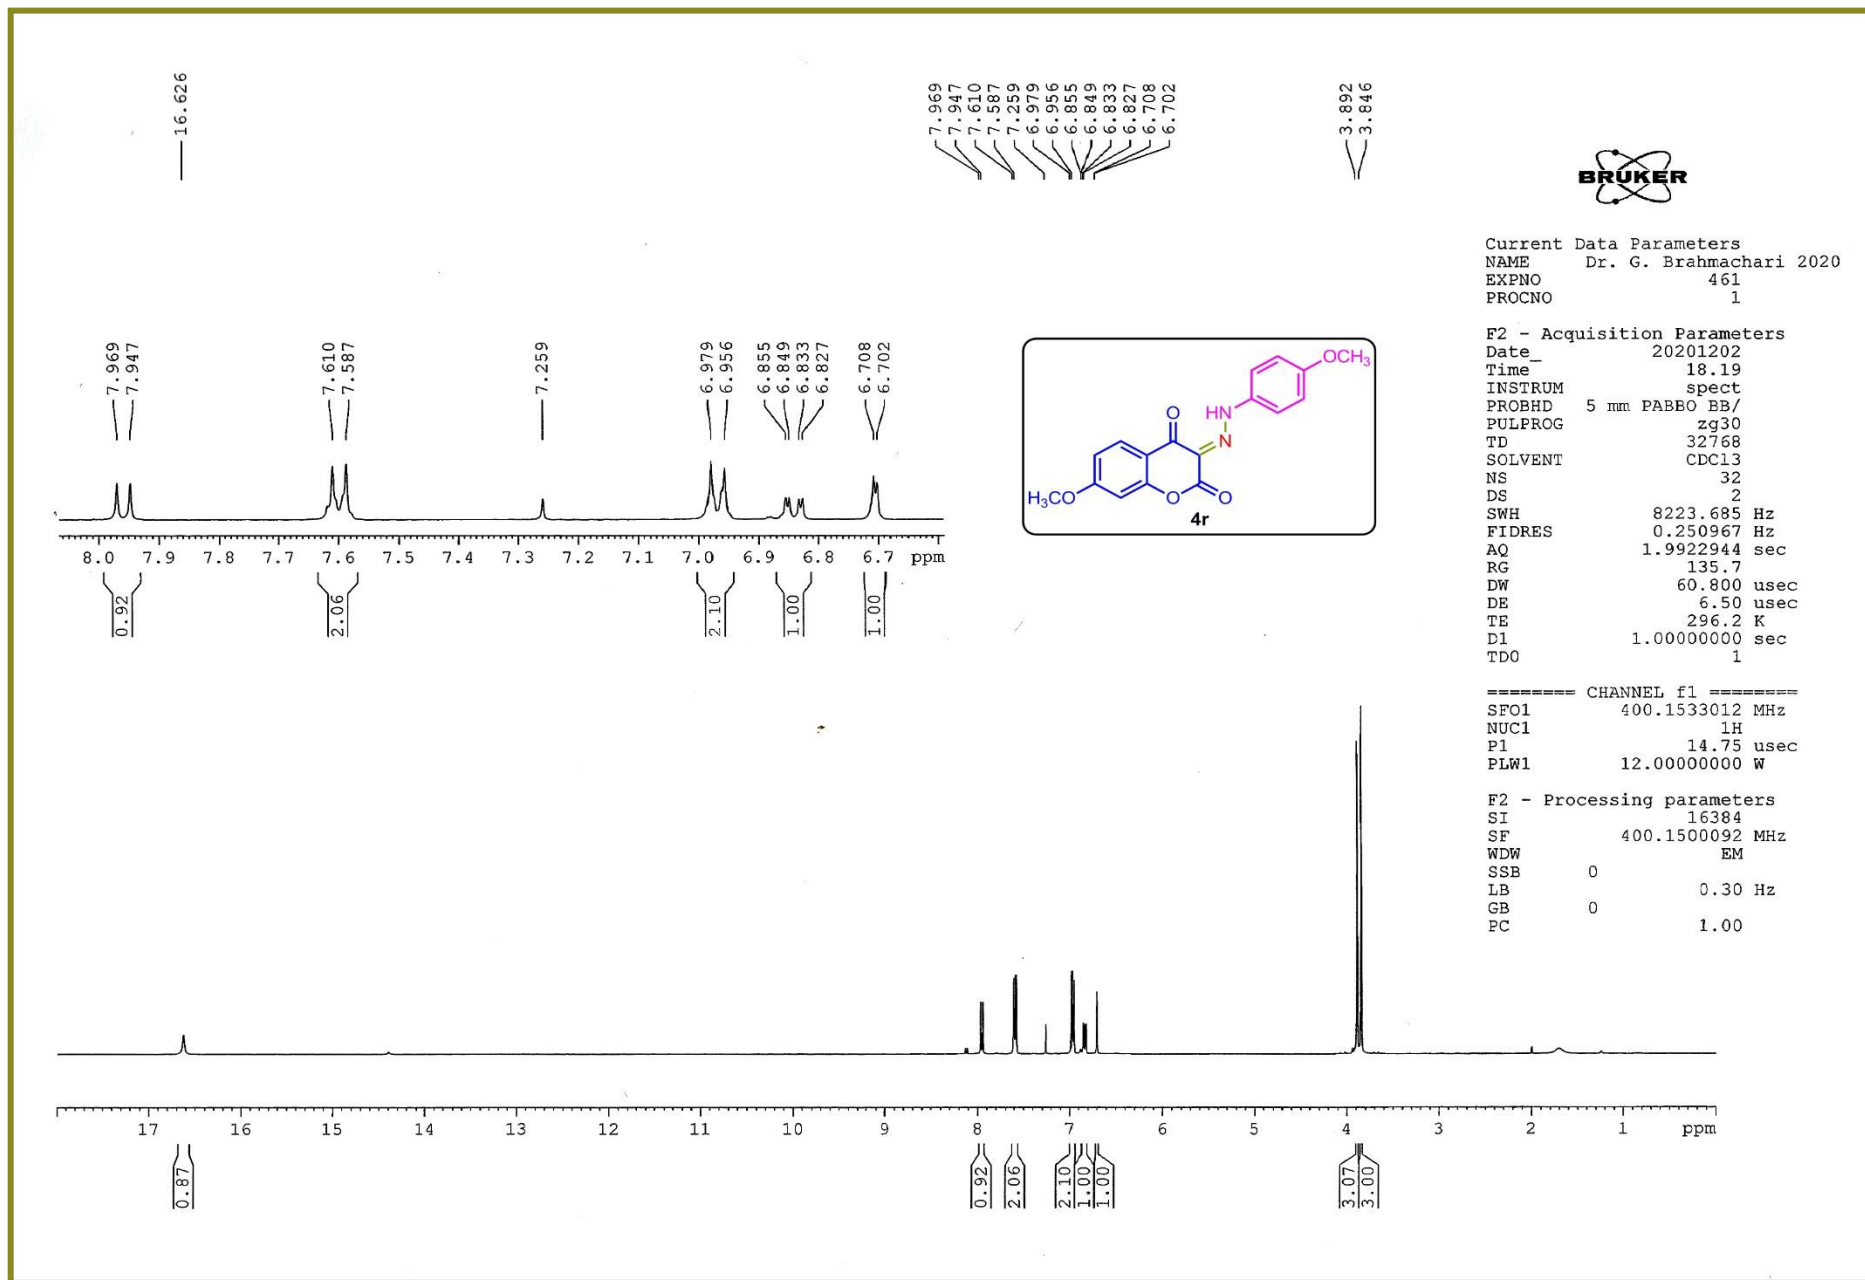

Figure S69. <sup>1</sup>H-NMR spectrum of (*E*)-7-methoxy-3-(2-(4-methoxyphenyl)hydrazineylidene)chromane-2,4-dione (**4r**)

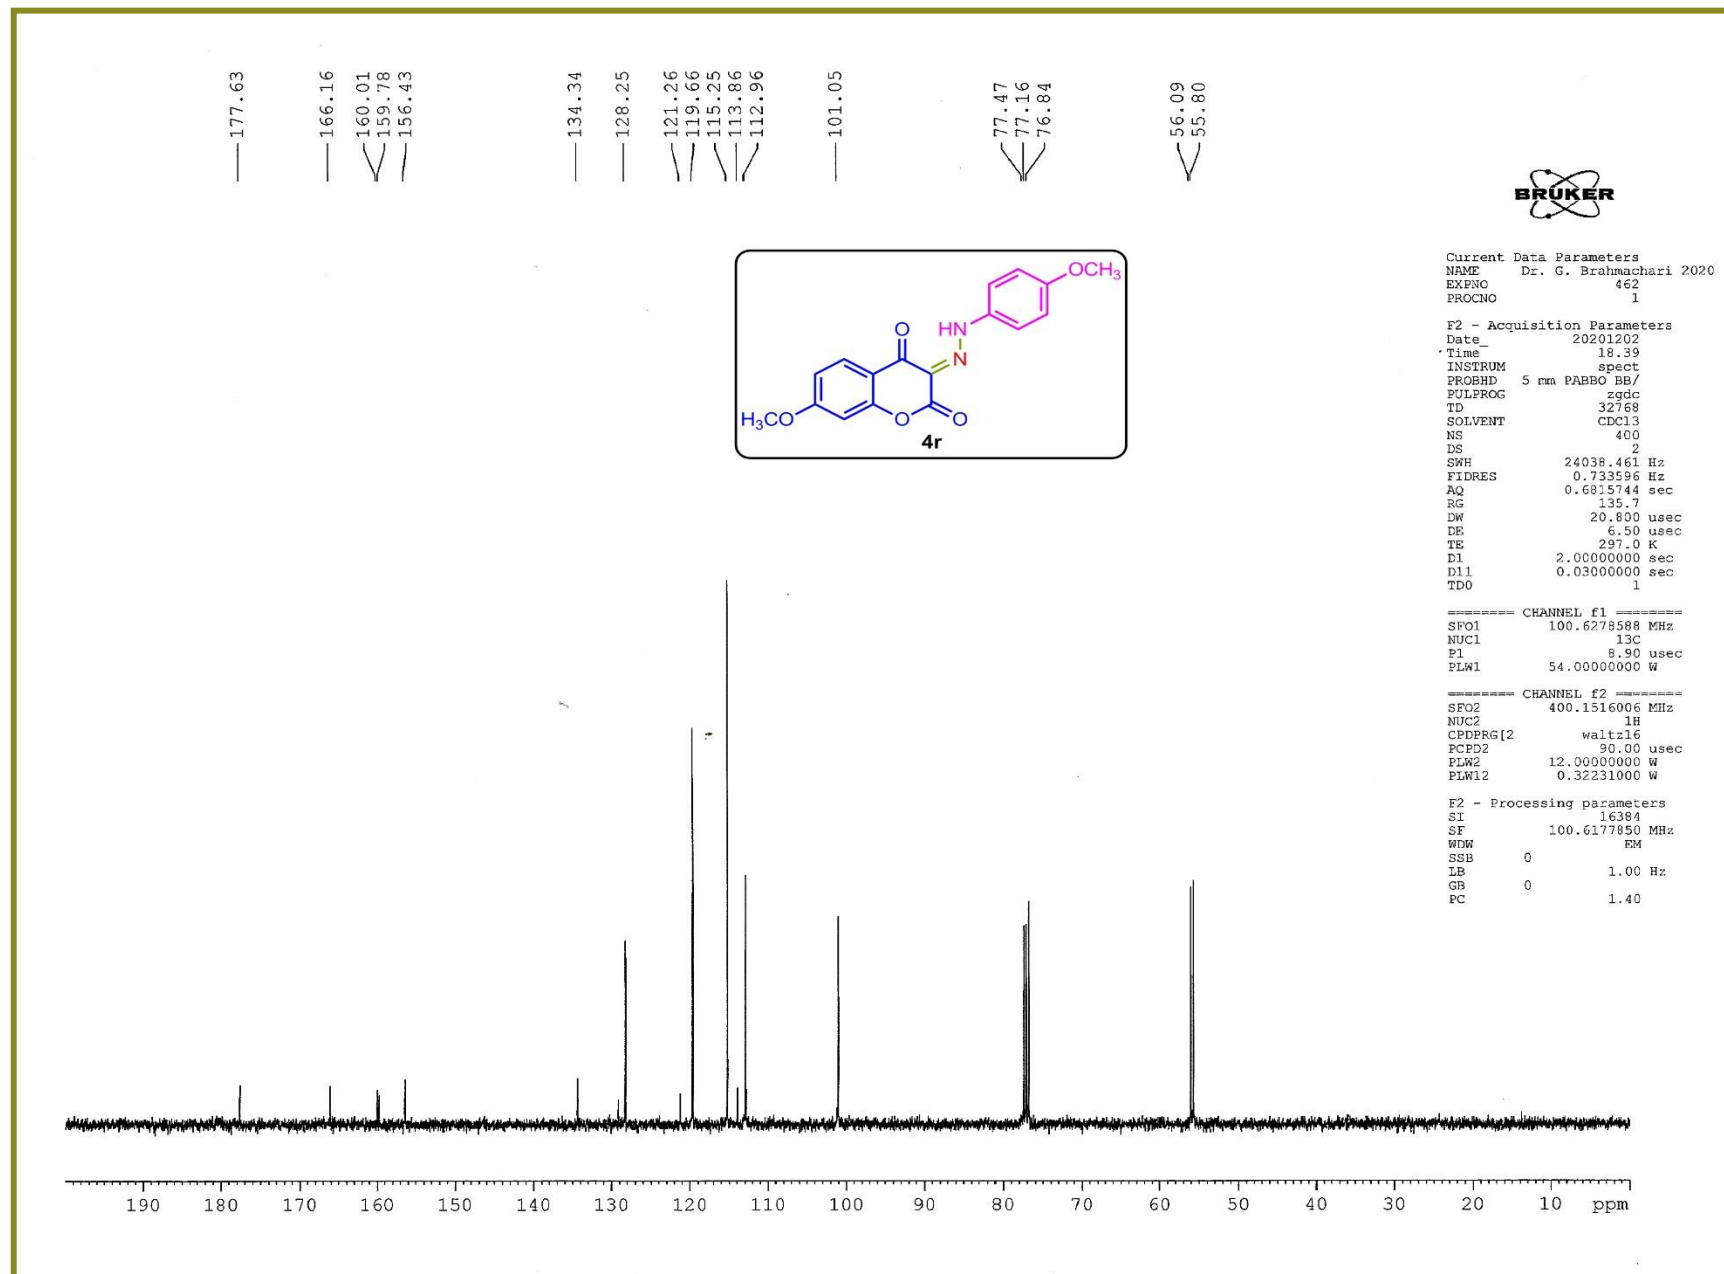

Figure S70. <sup>13</sup>C-NMR spectrum of (*E*)-7-methoxy-3-(2-(4-methoxyphenyl)hydrazineylidene)chromane-2,4-dione (**4r**)

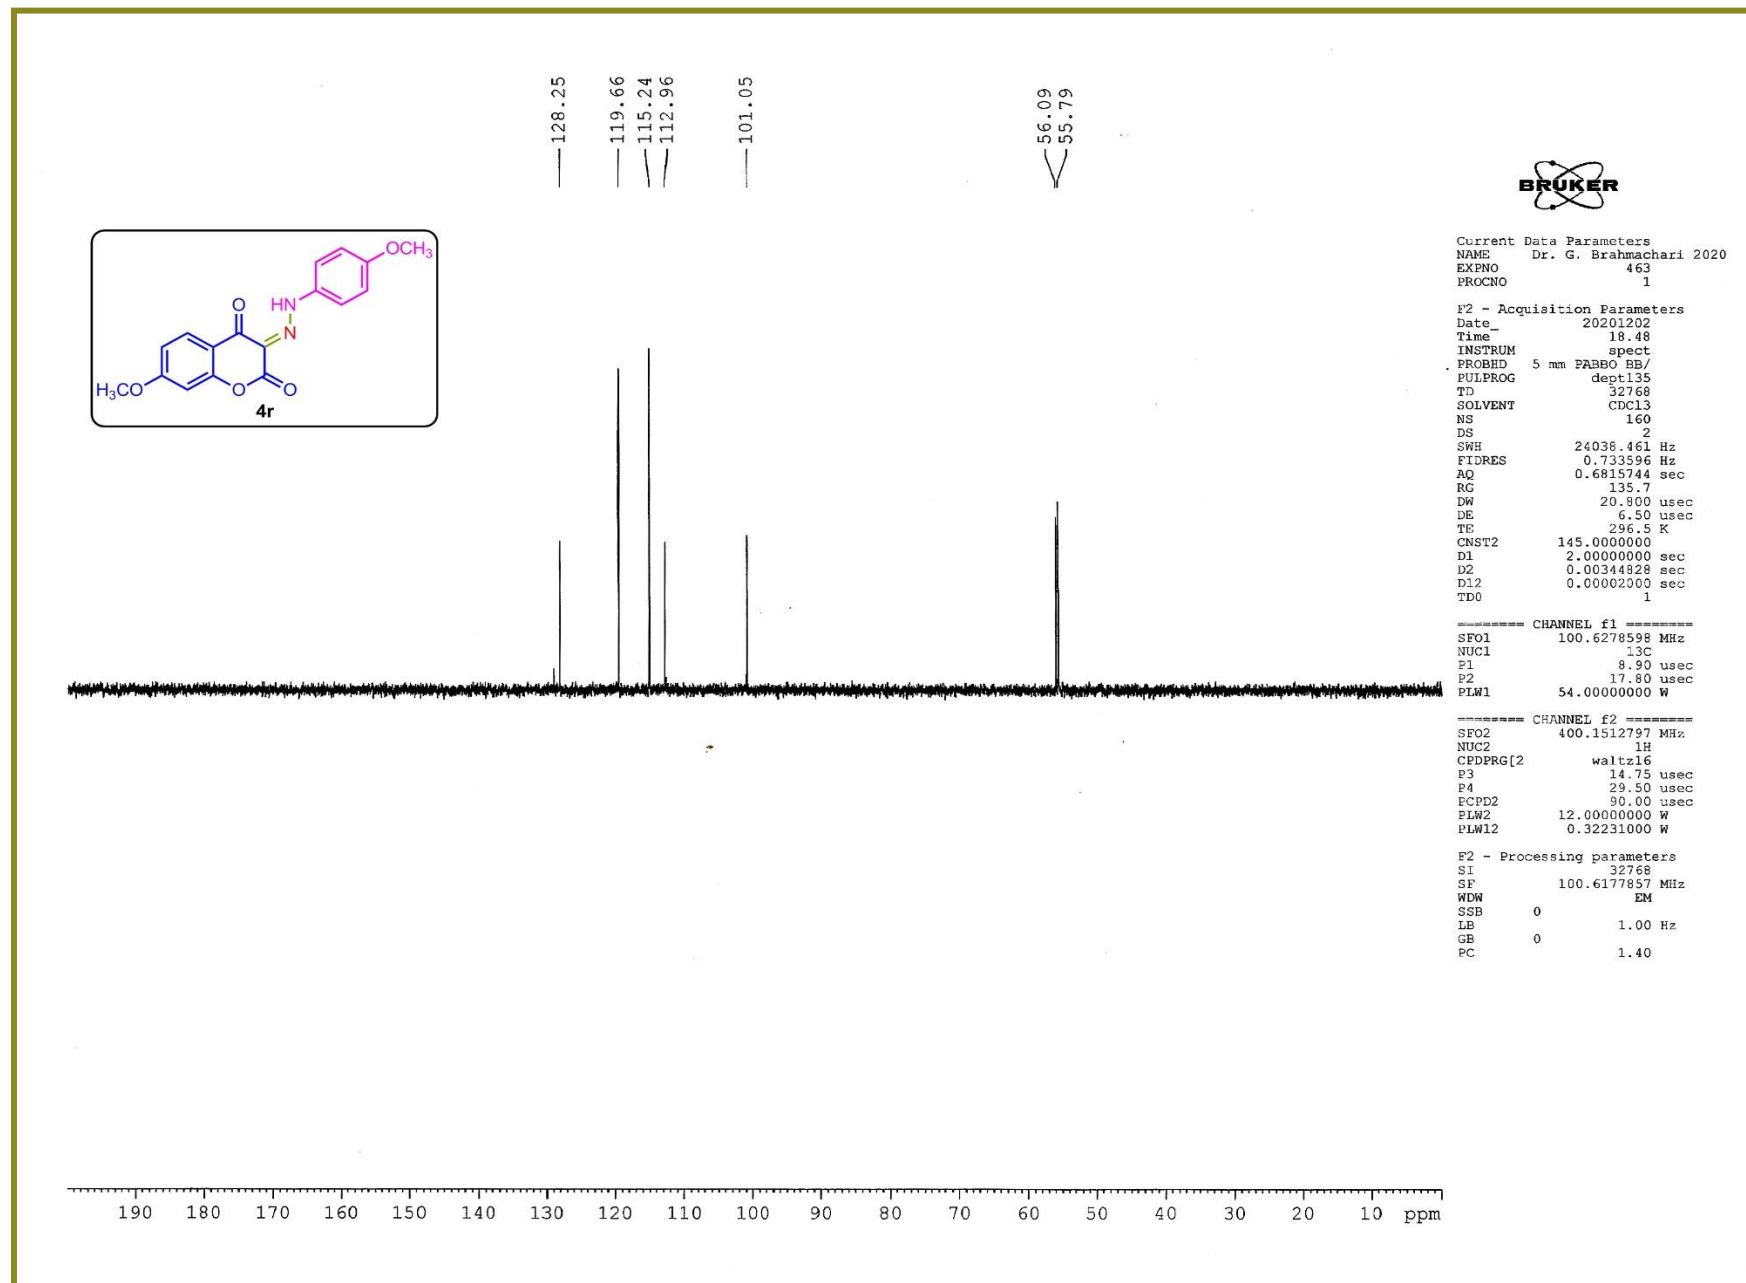

Figure S71. DEPT-135 NMR spectrum of (*E*)-7-methoxy-3-(2-(4-methoxyphenyl)hydrazineylidene)chromane-2,4-dione (**4r**)

GB-16 3 (0.068) Sm (Mn, 2x3.00); Cm (2:4)

TOF MS ES+  
1.78e6

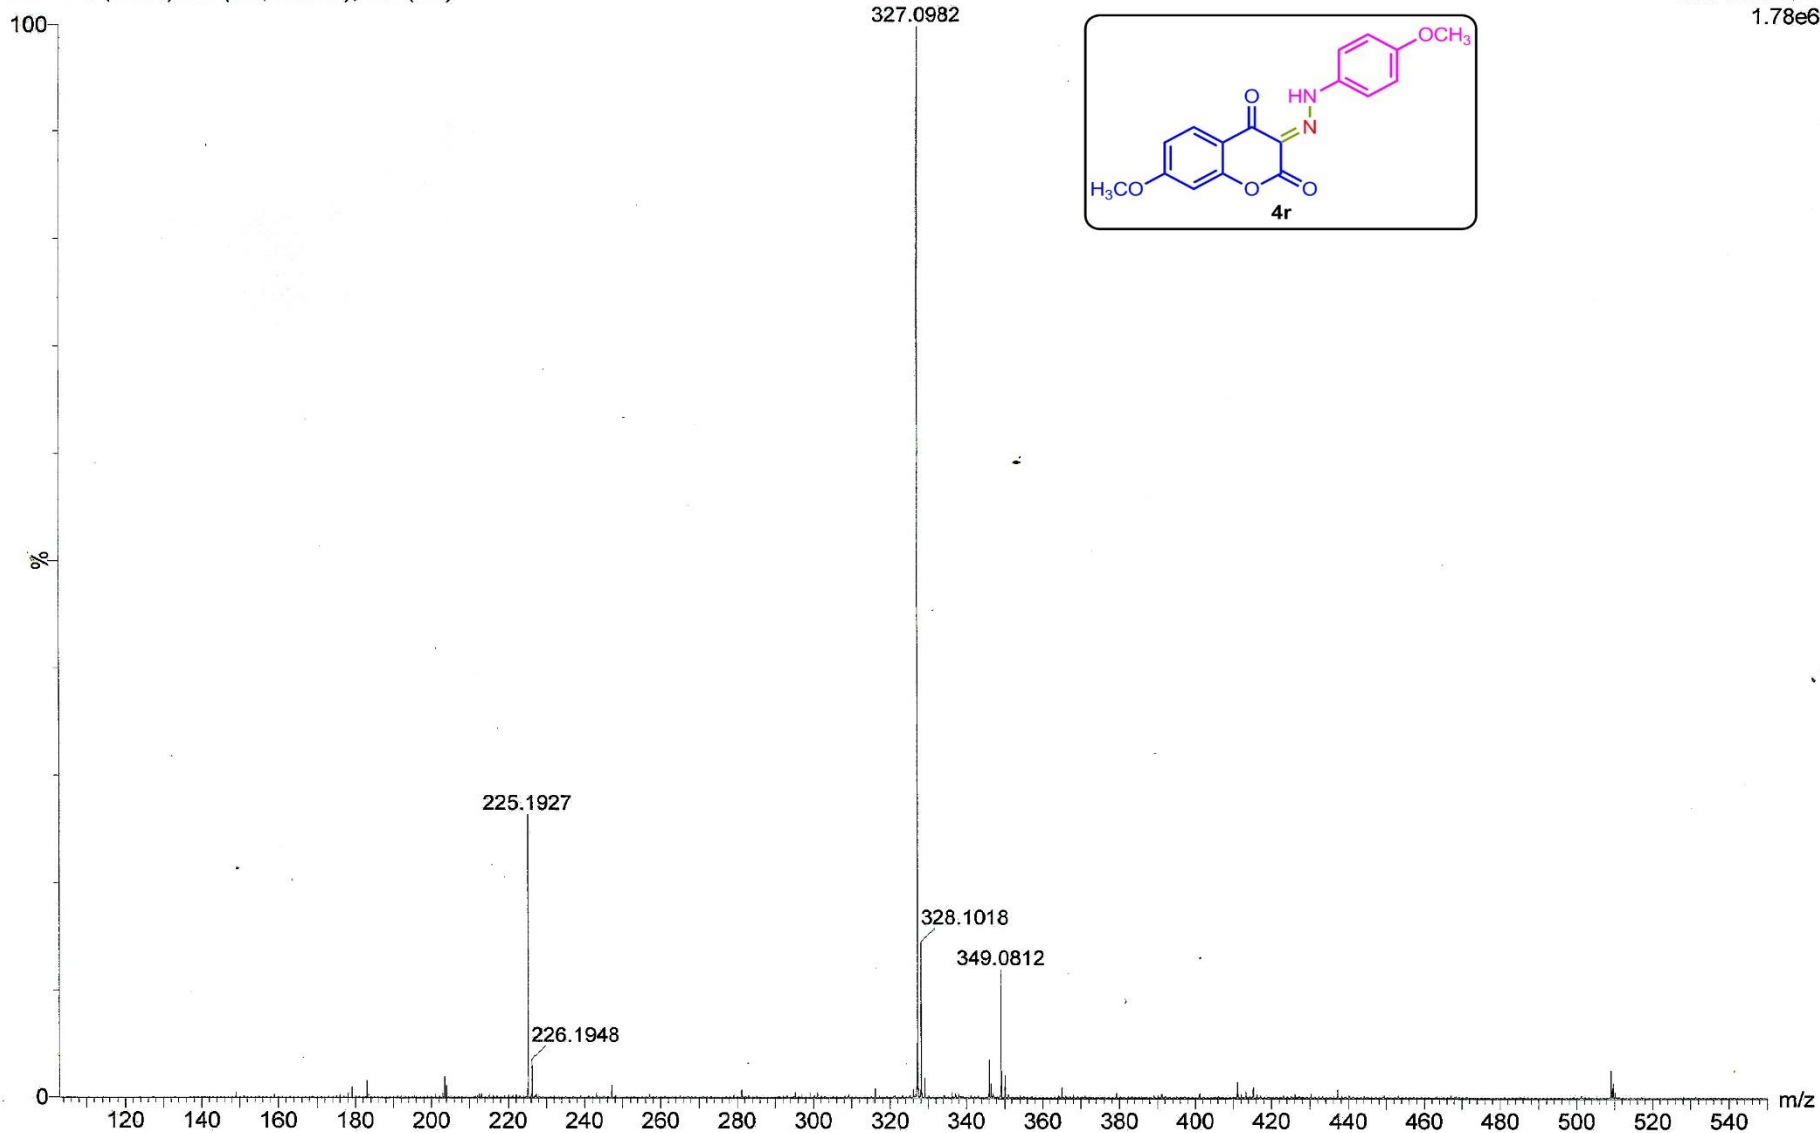

Figure S72. Mass spectra of (*E*)-7-methoxy-3-(2-(4-methoxyphenyl)hydrazineylidene)chromane-2,4-dione (**4r**)

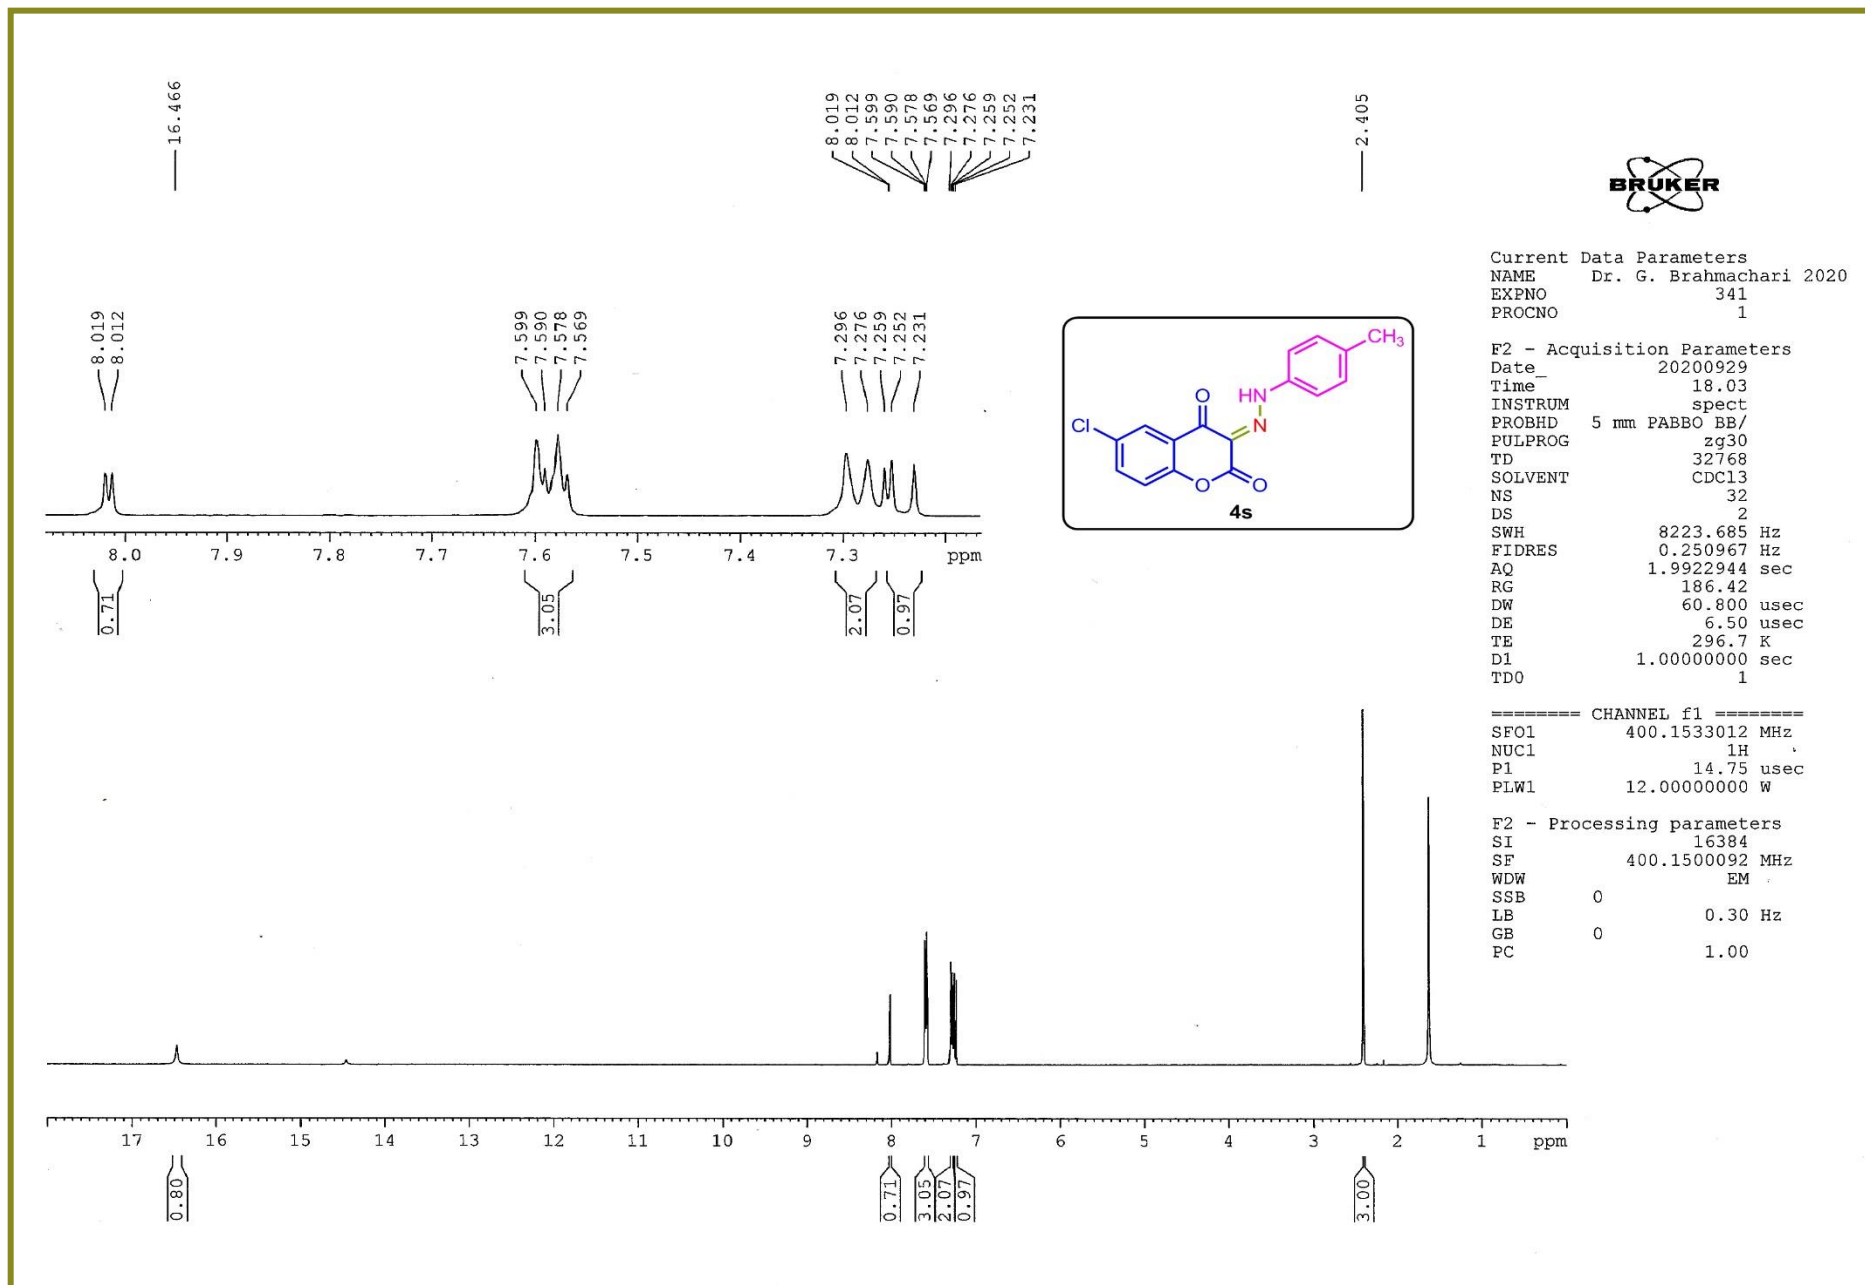

Figure S73. <sup>1</sup>H-NMR spectrum of (*E*)-6-chloro-3-(2-(*p*-tolyl)hydrazineylidene)chromane-2,4-dione (**4s**)

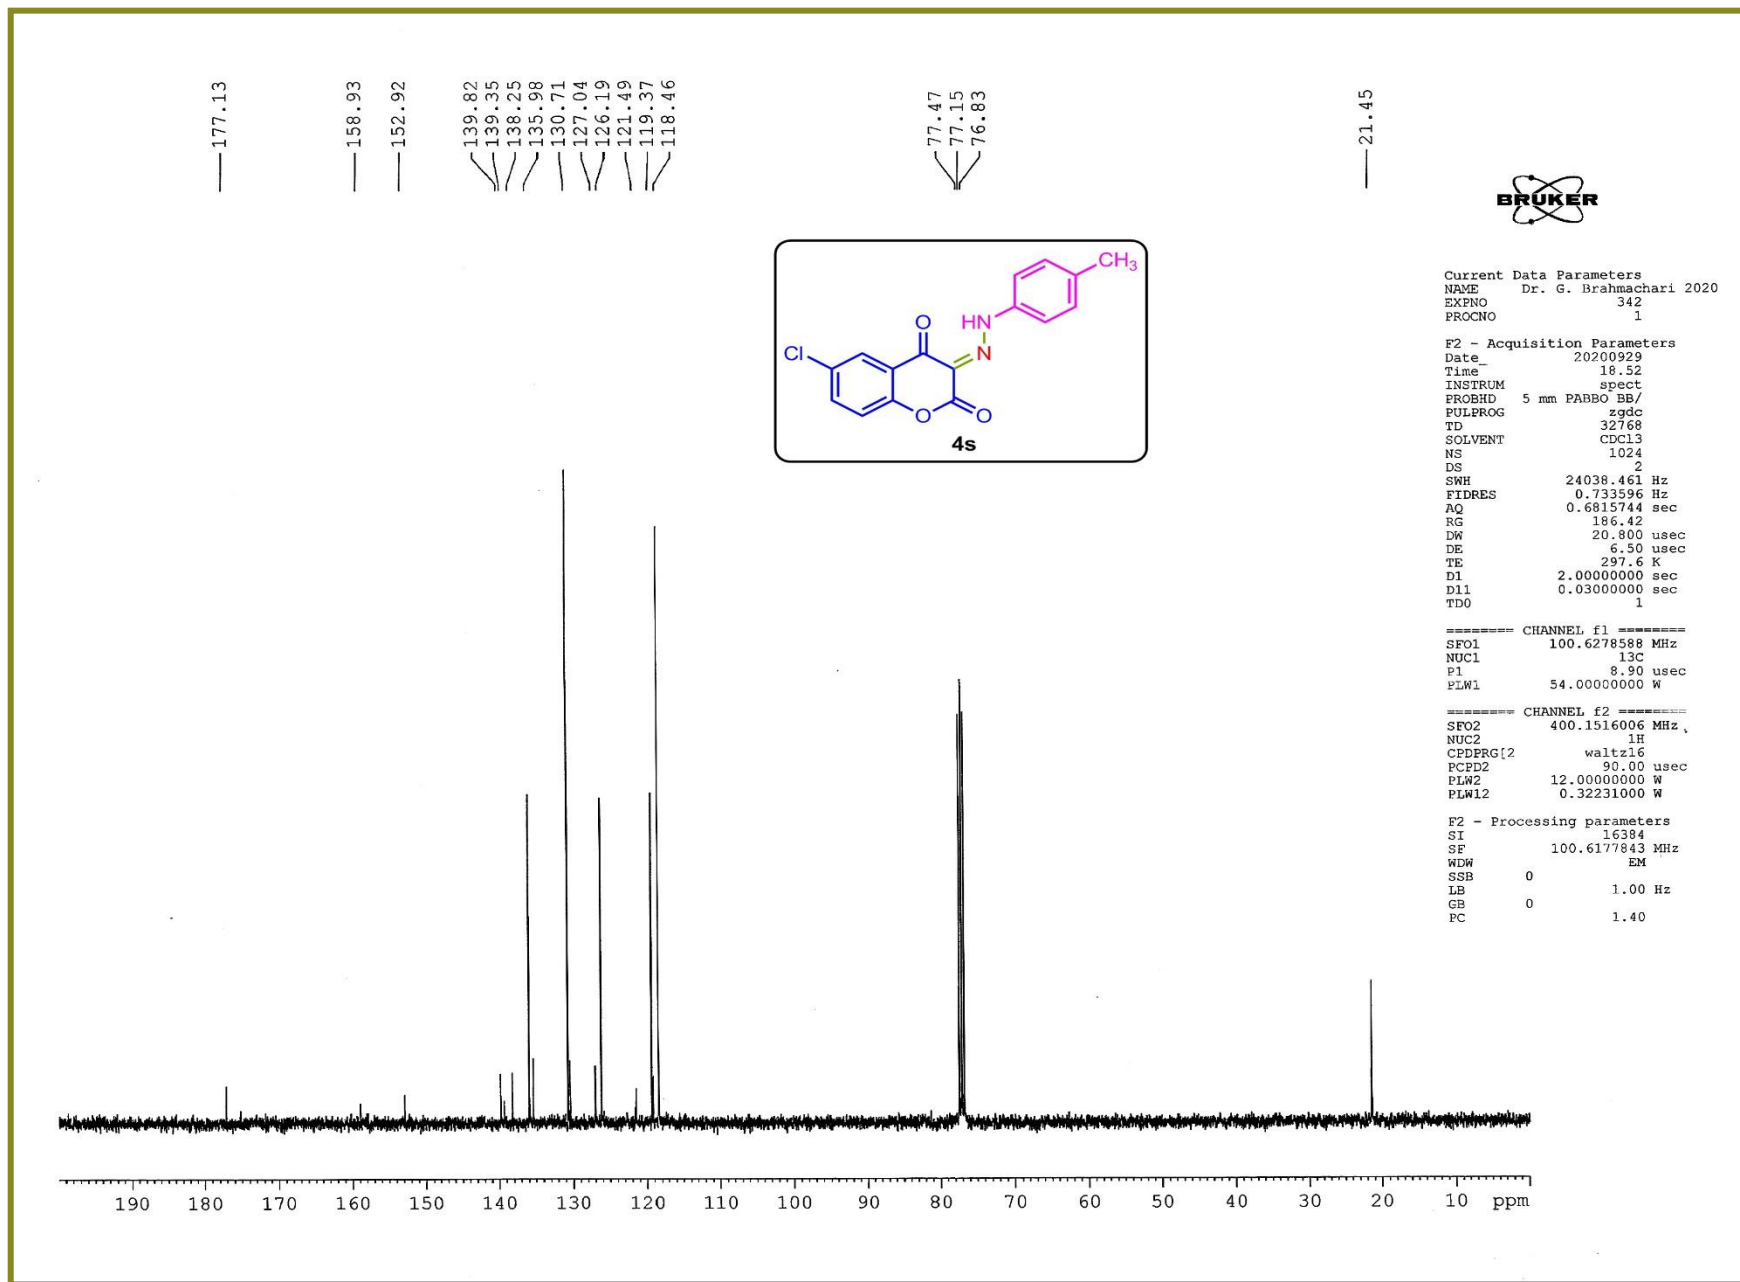

Figure S74. <sup>13</sup>C-NMR spectrum of (*E*)-6-chloro-3-(2-(*p*-tolyl)hydrazineylidene)chromane-2,4-dione (**4s**)



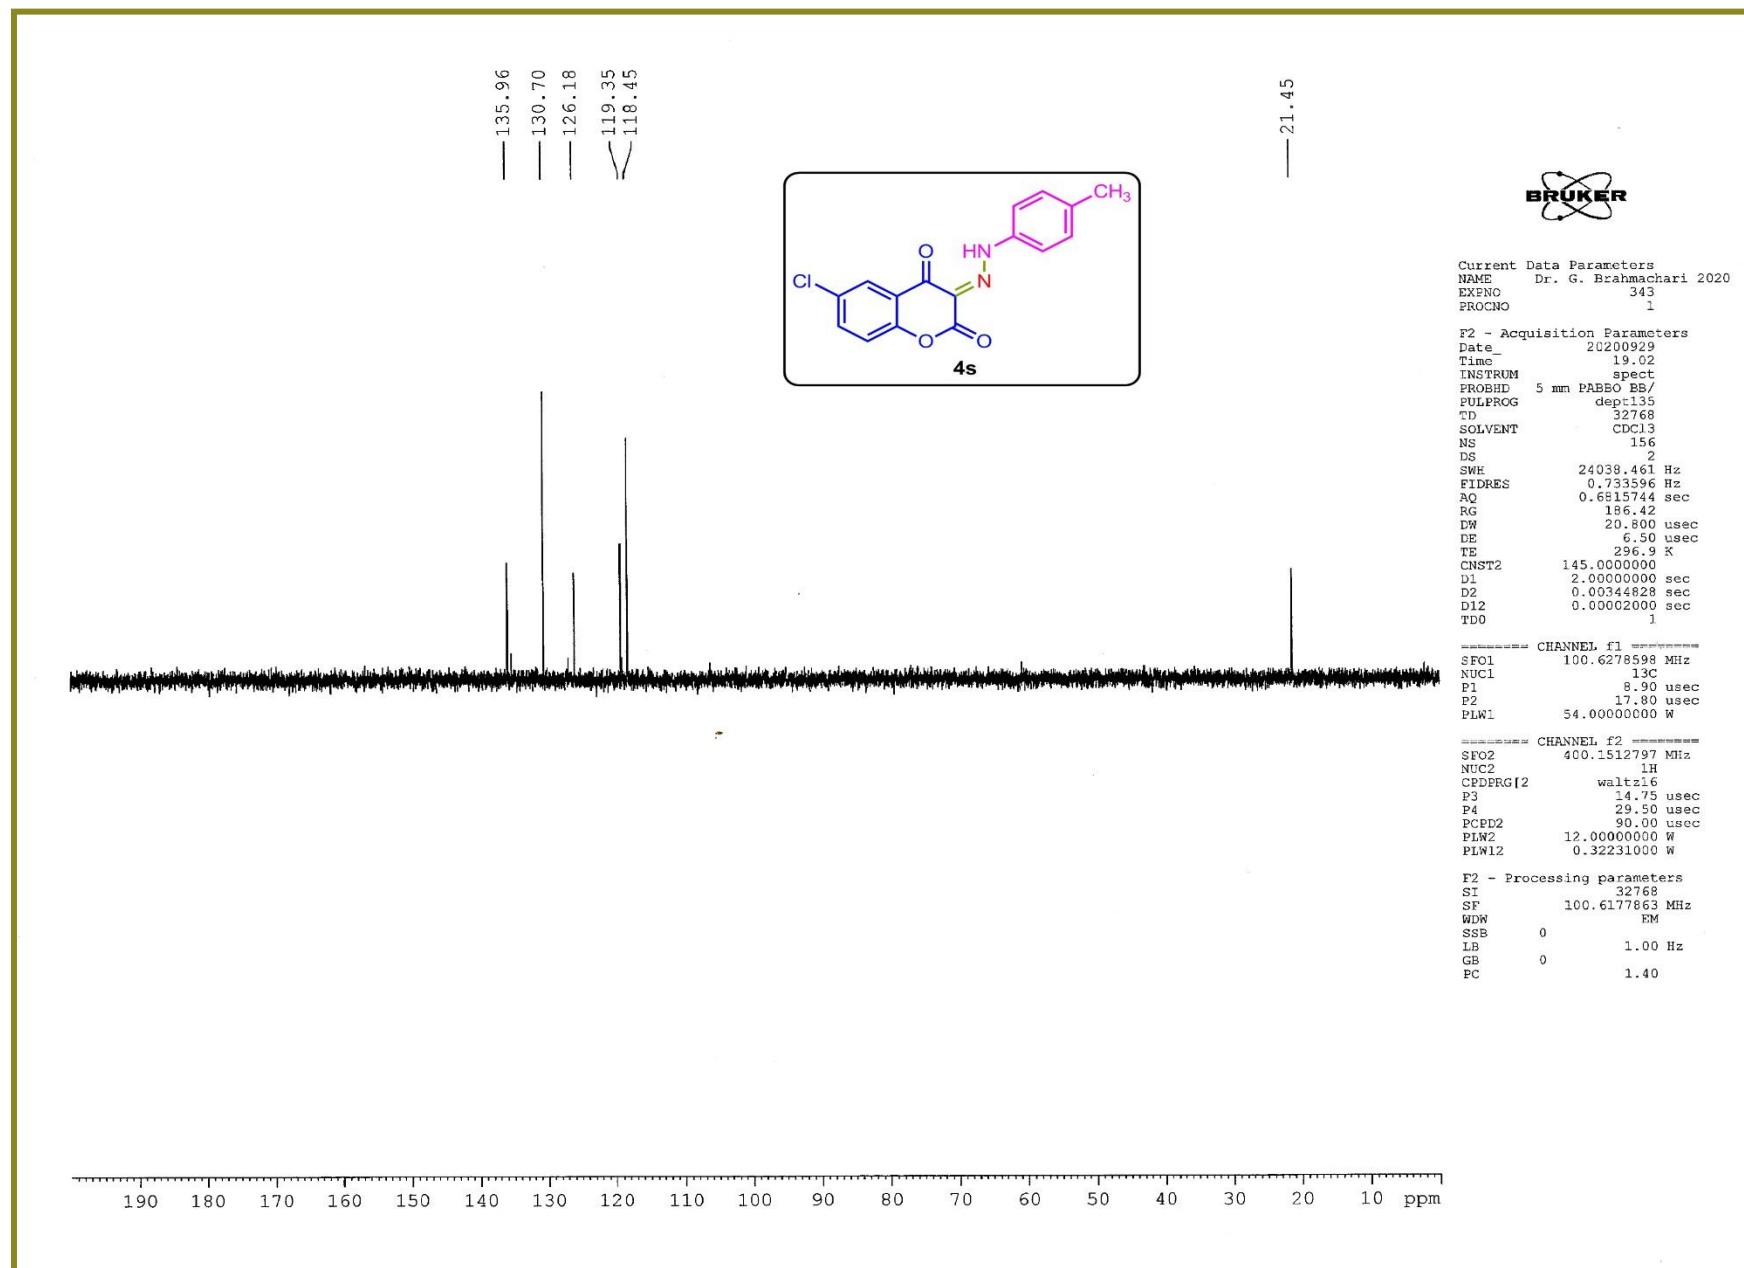

Figure S75. DEPT-135 NMR spectrum of (*E*)-6-chloro-3-(2-(*p*-tolyl)hydrazineylidene)chromane-2,4-dione (**4s**)

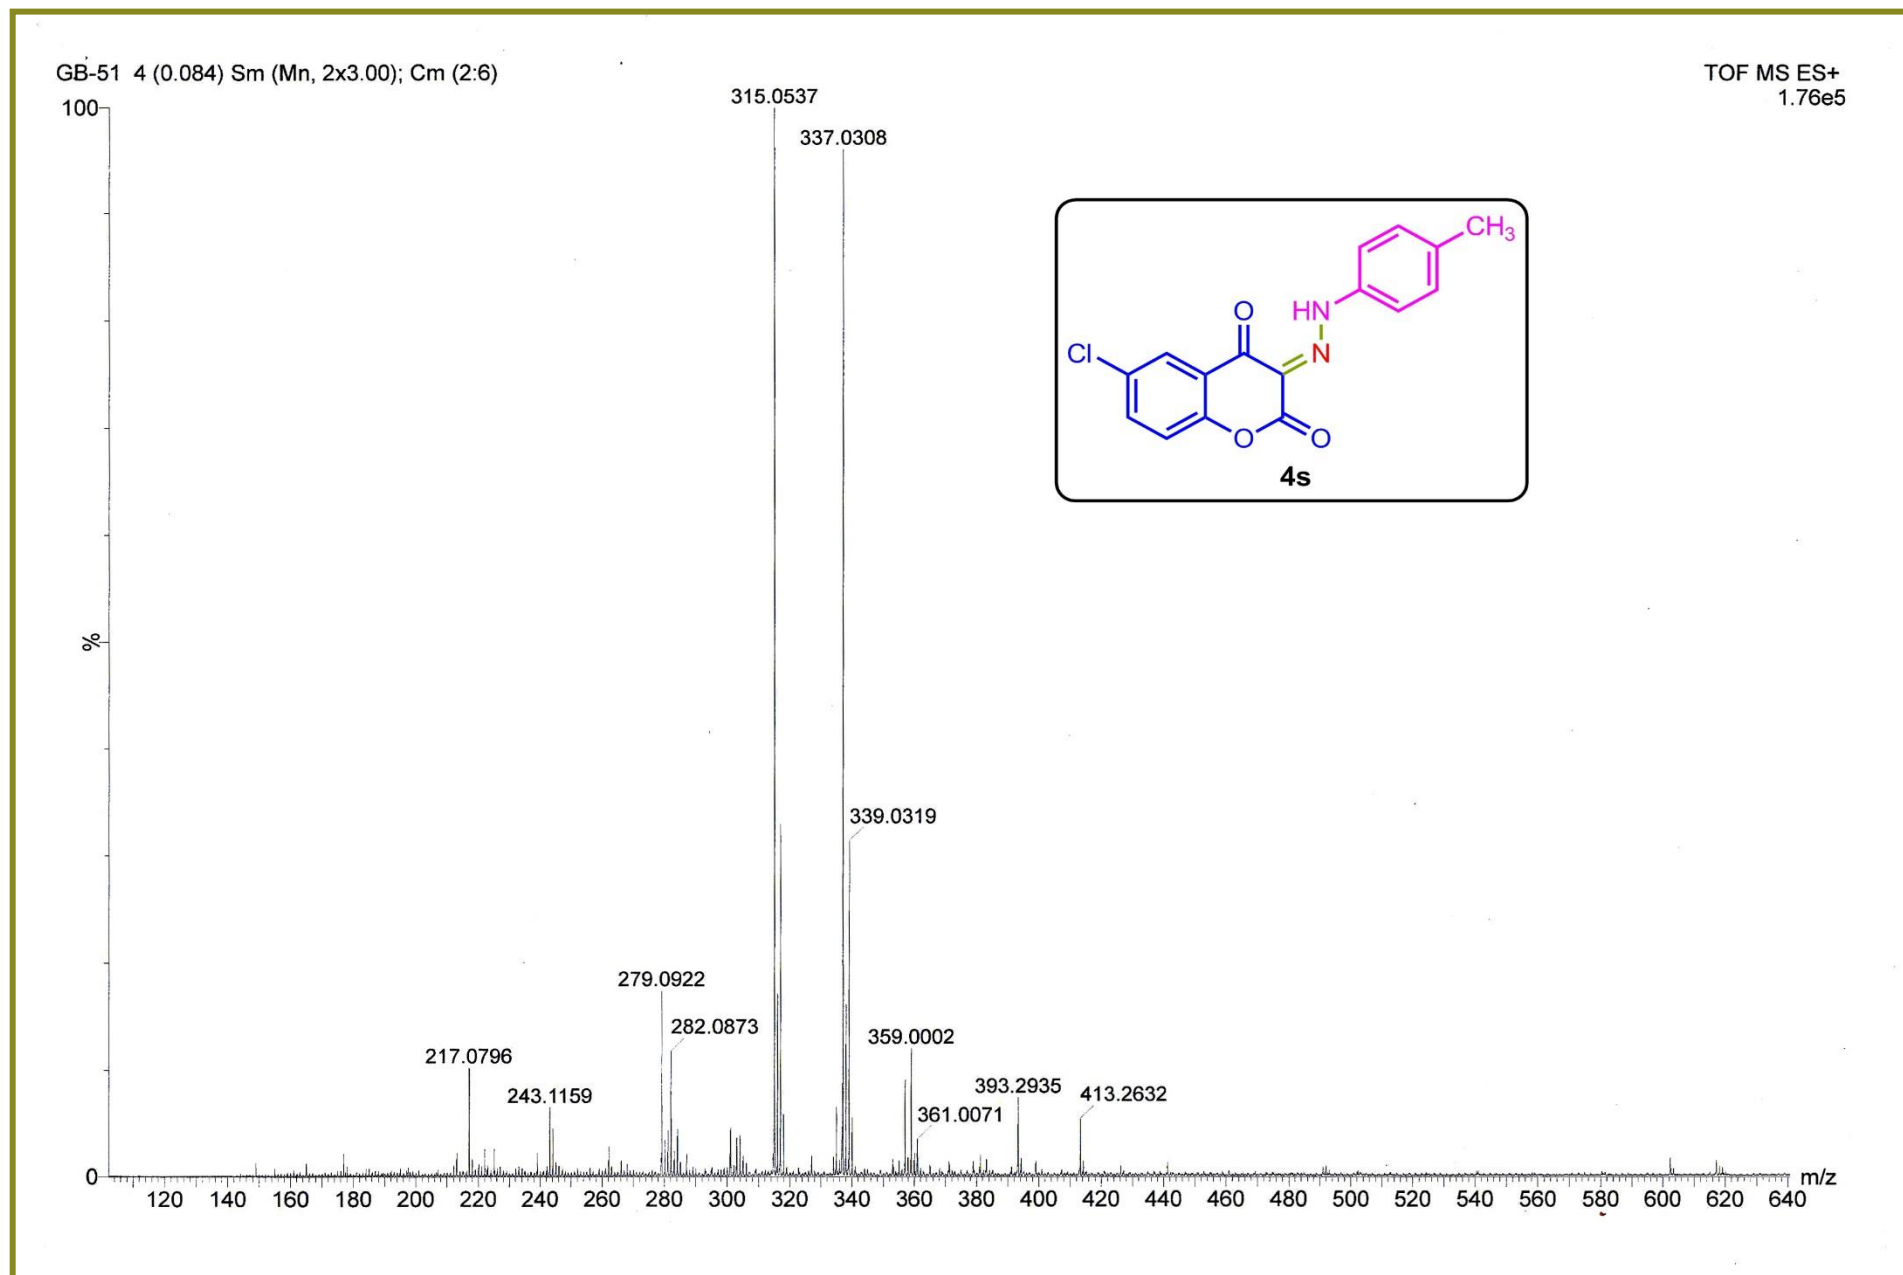

Figure S76. Mass spectra of (*E*)-6-chloro-3-(2-(*p*-tolyl)hydrazineylidene)chromane-2,4-dione (**4s**)

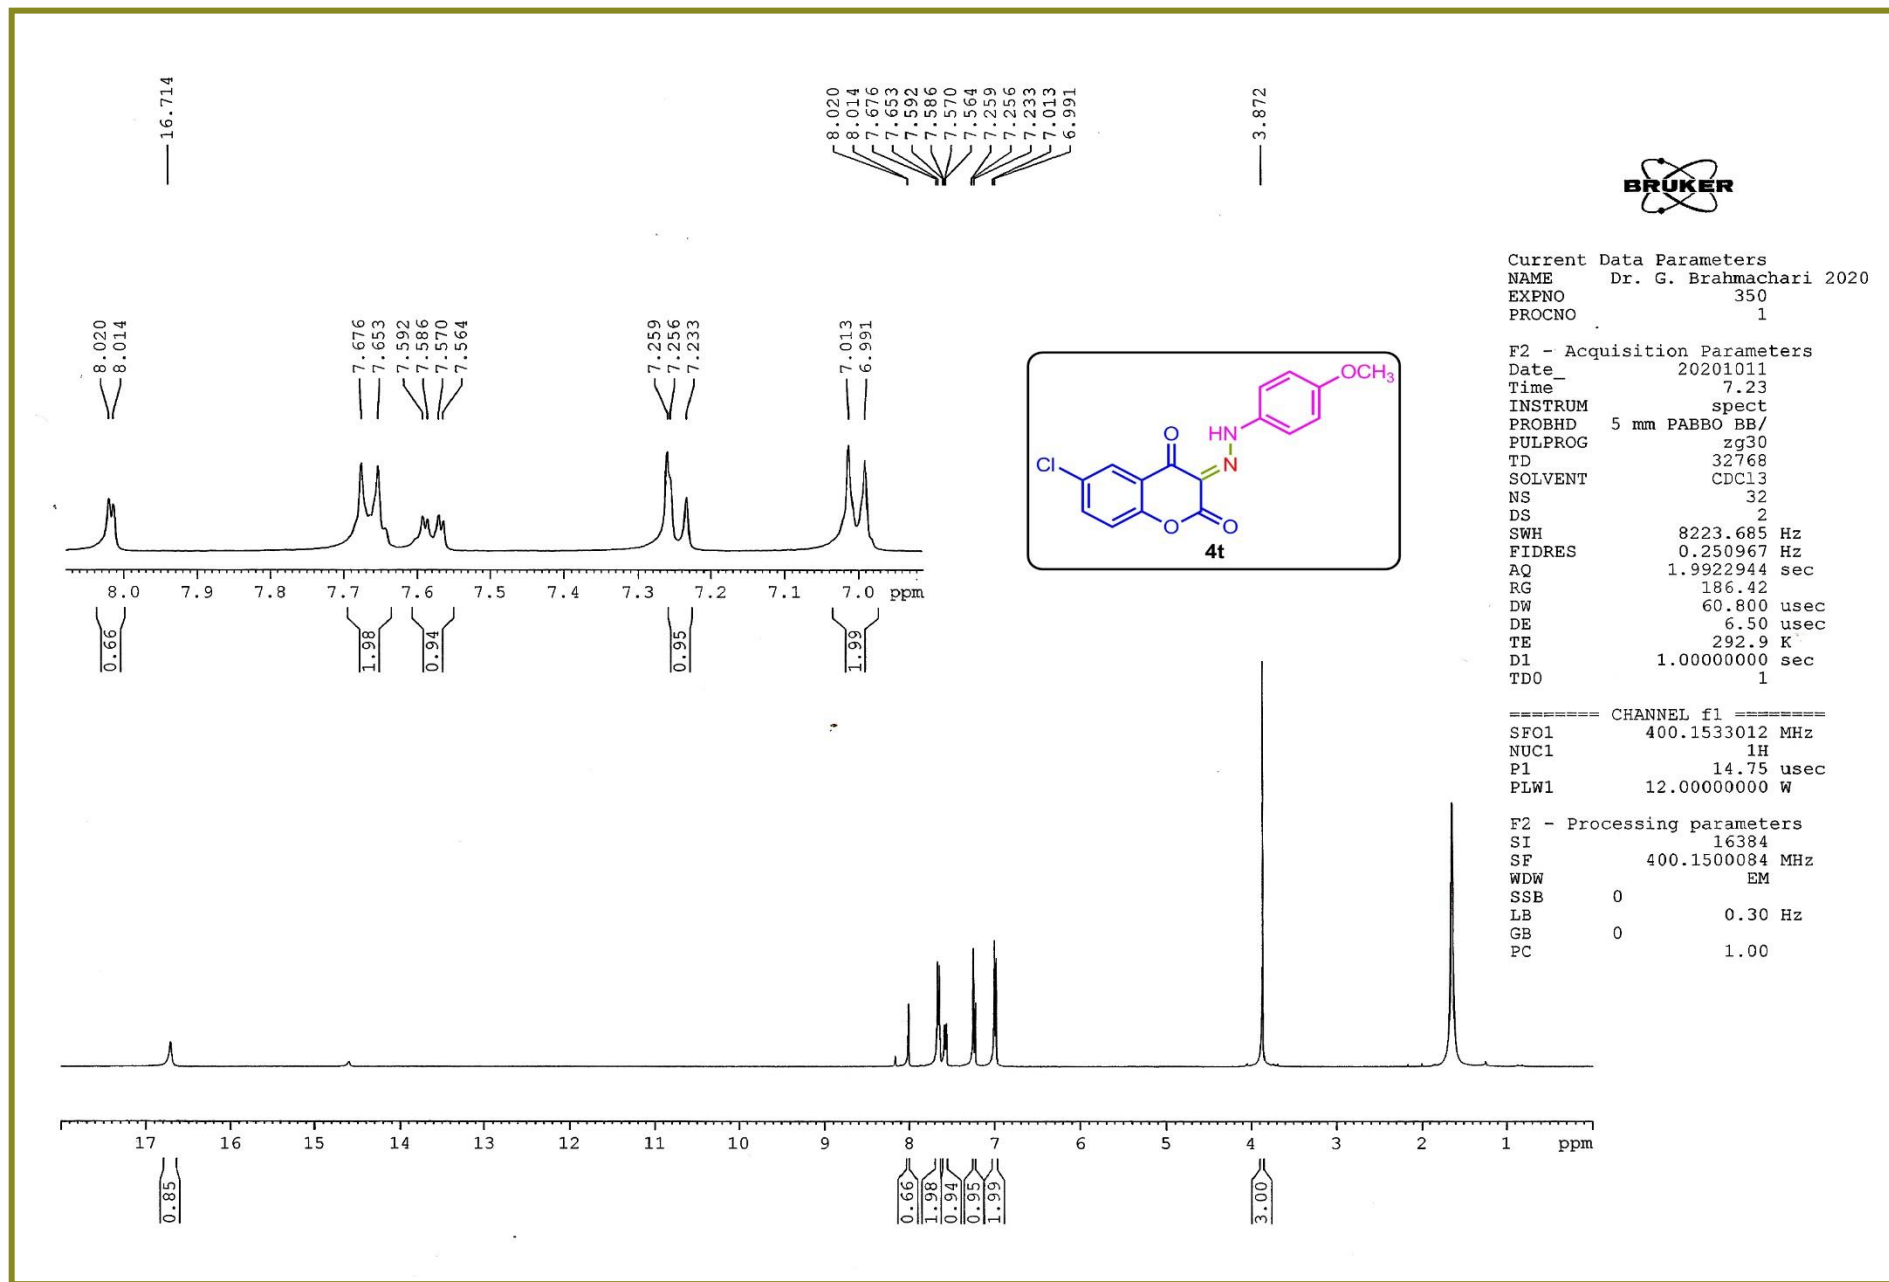

Figure S77. <sup>1</sup>H-NMR spectrum of (*E*)-6-chloro-3-(2-(4-methoxyphenyl)hydrazineylidene)chromane-2,4-dione (**4t**)

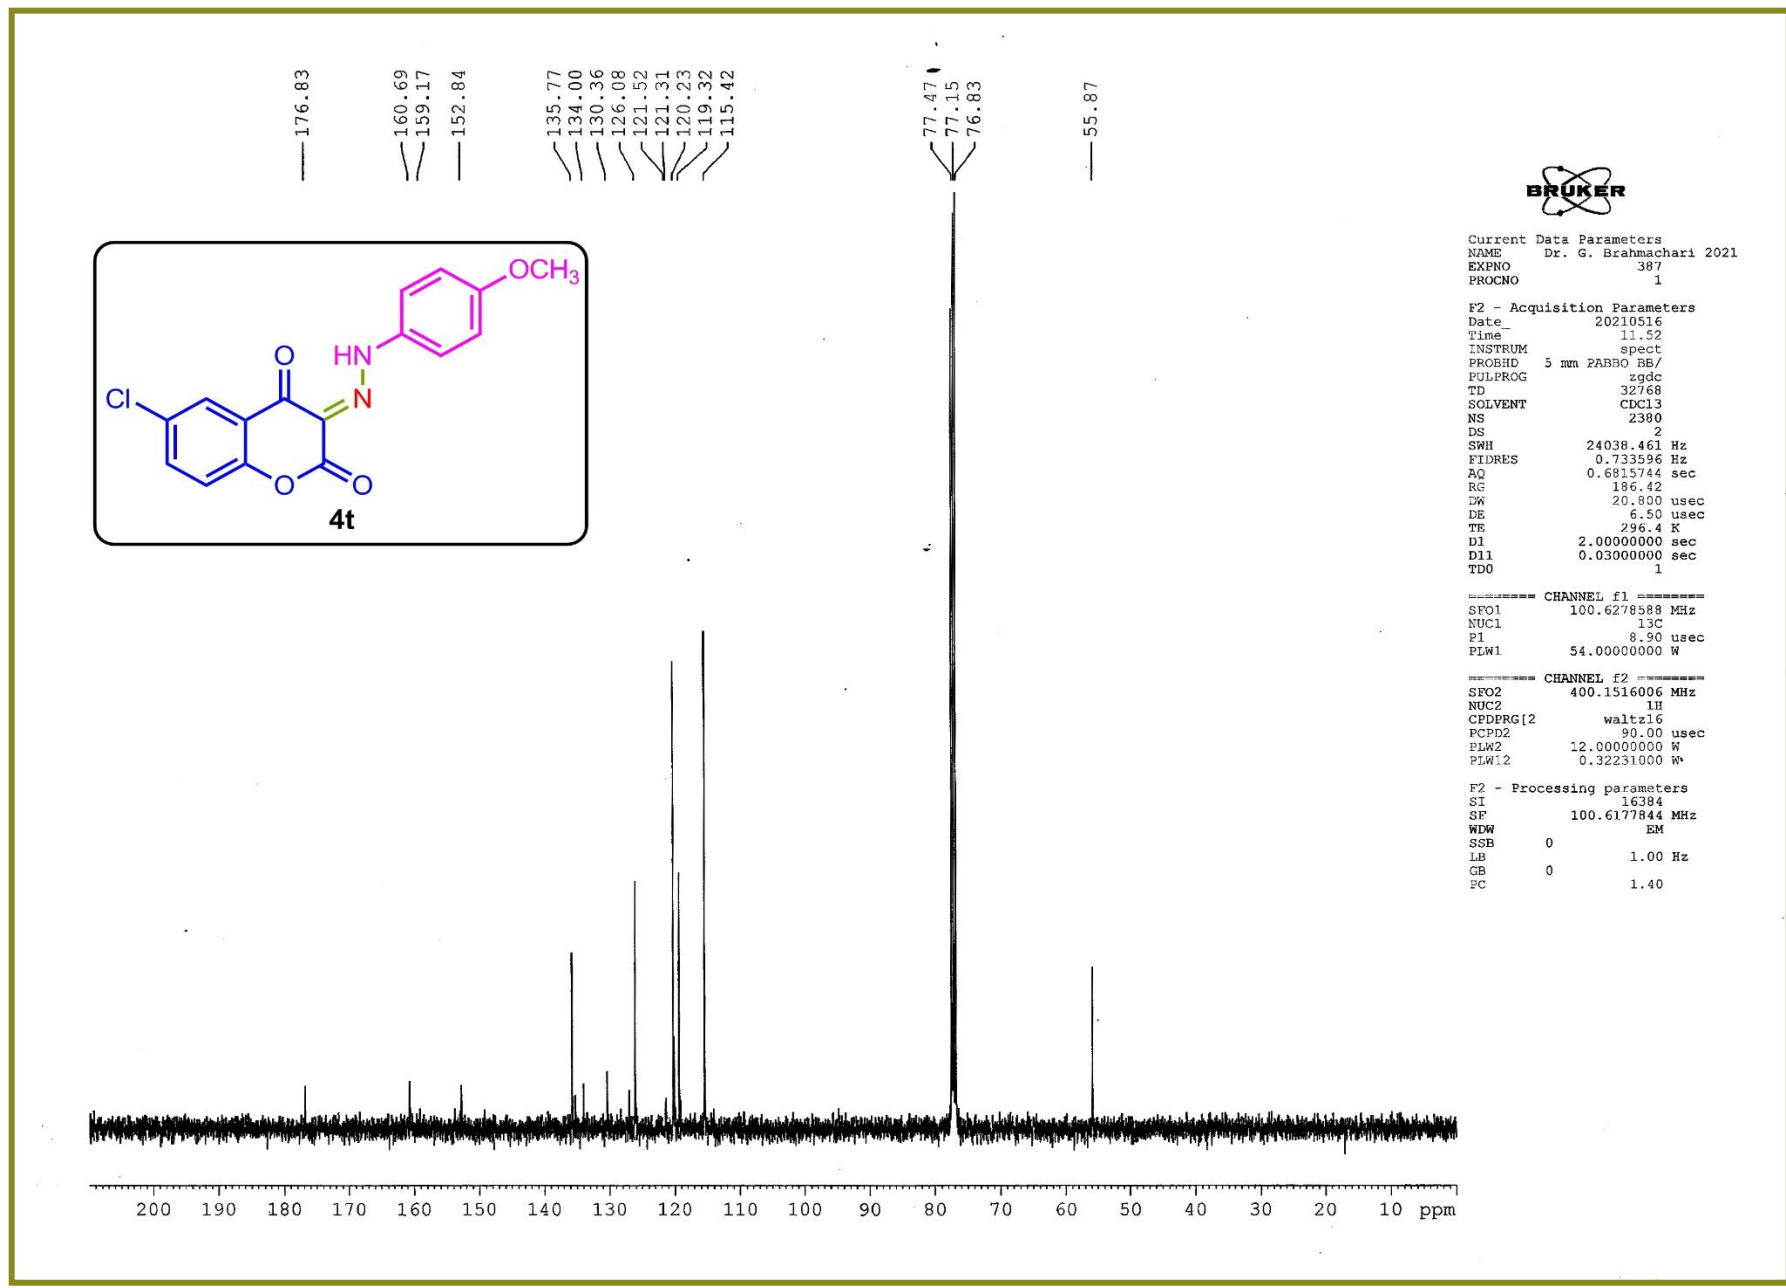

Figure S78. <sup>13</sup>C-NMR spectrum of (*E*)-6-chloro-3-(2-(4-methoxyphenyl)hydrazineylidene)chromane-2,4-dione (**4t**)

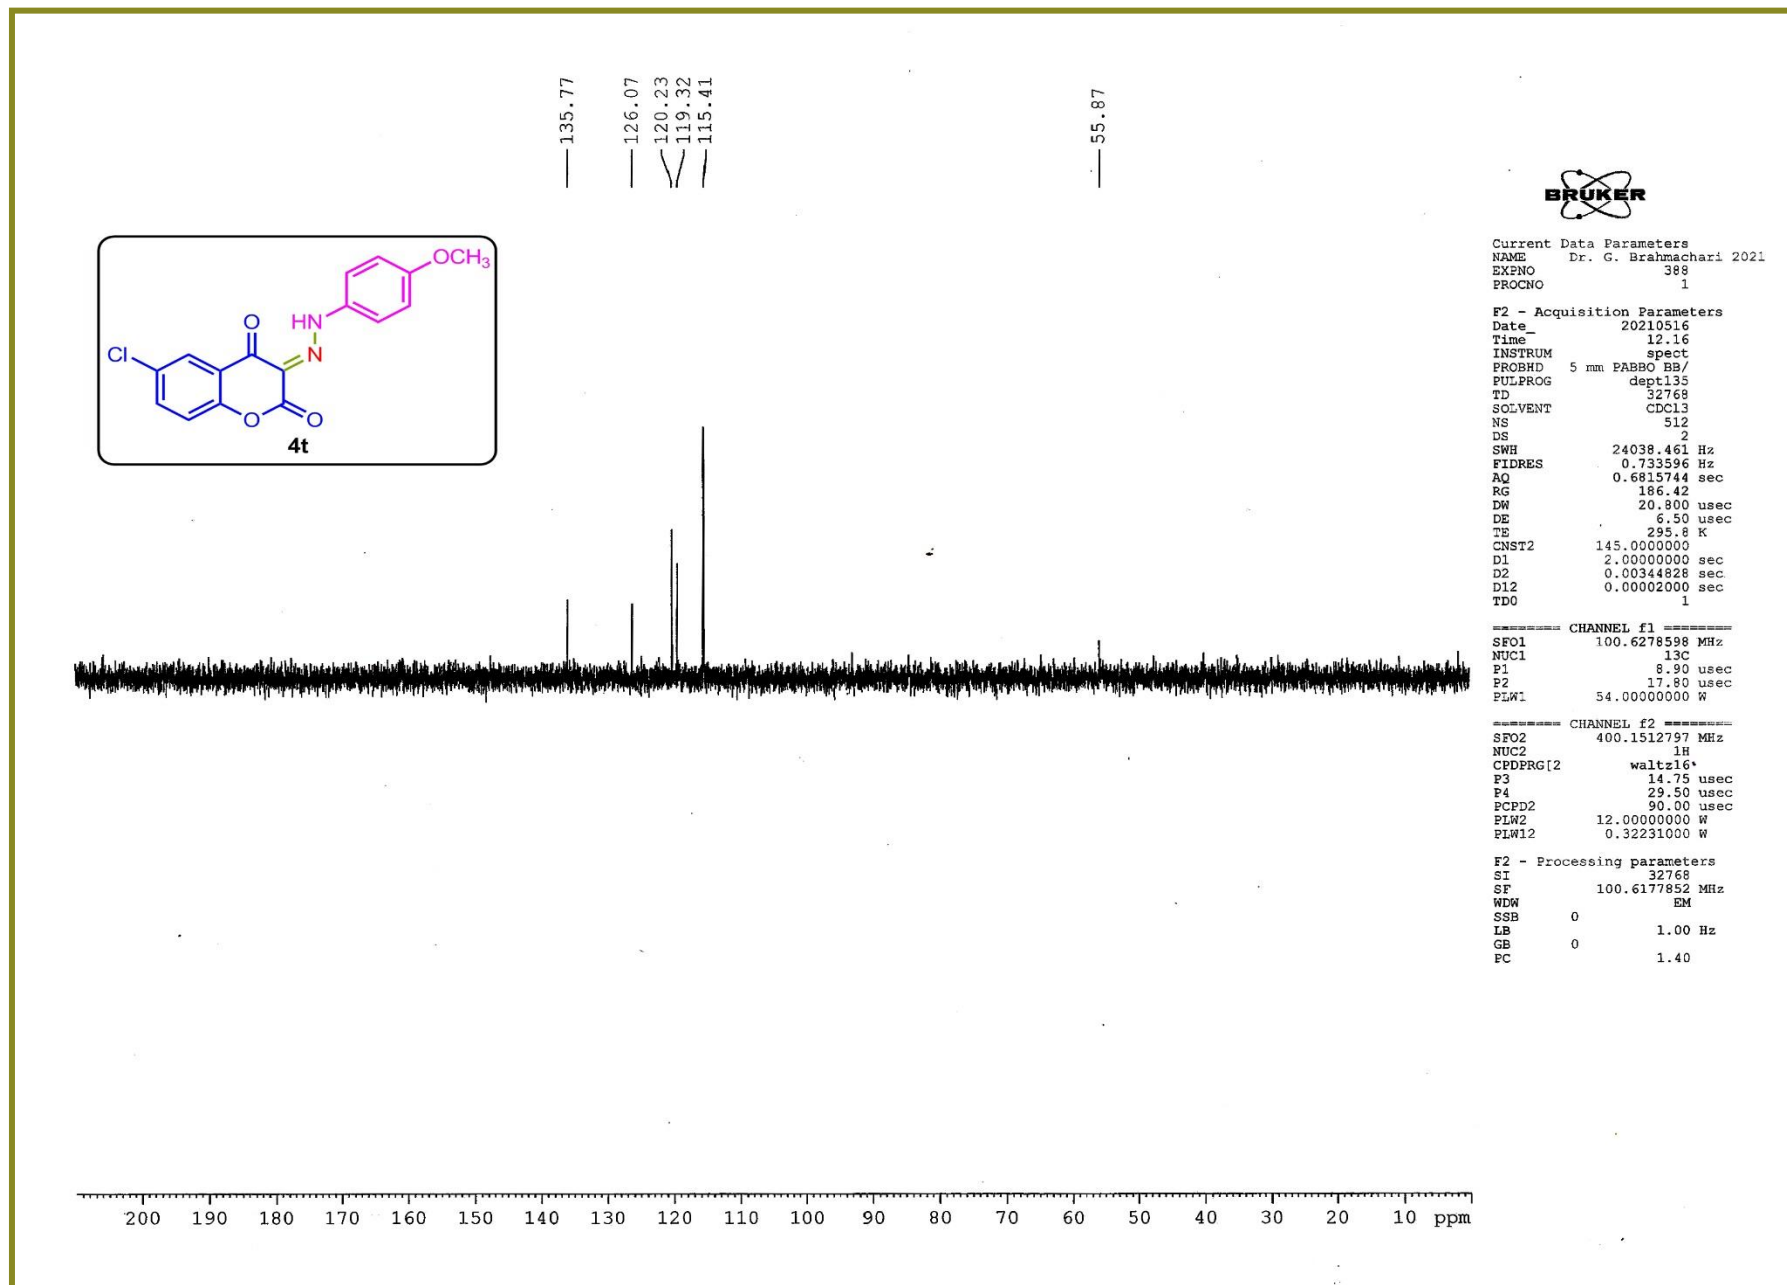

Figure S79. DEPT-135 NMR spectrum of (*E*)-6-chloro-3-(2-(4-methoxyphenyl)hydrazineylidene)chromane-2,4-dione (**4t**)

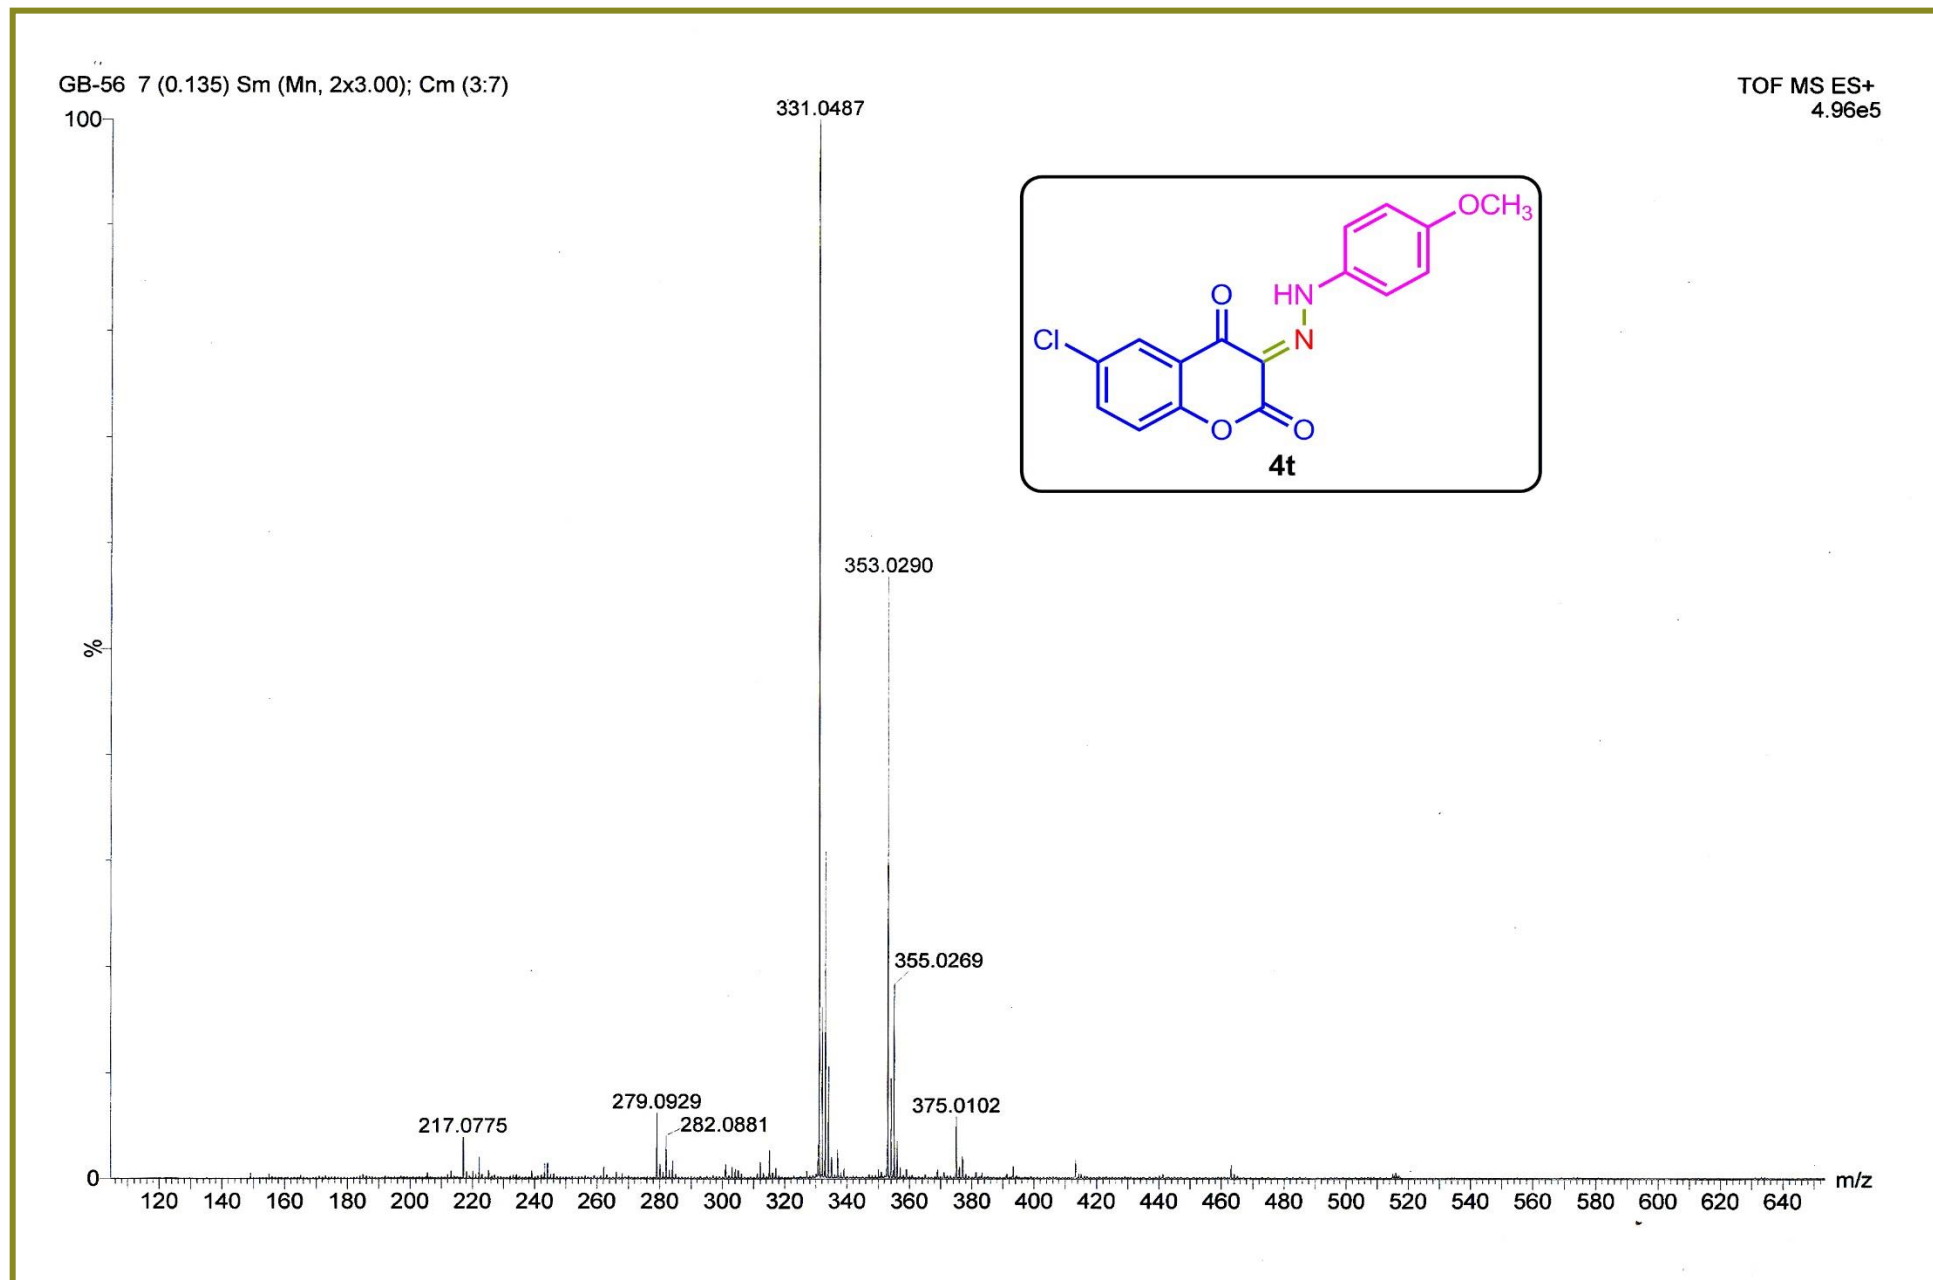

Figure S80. Mass spectra of (*E*)-6-chloro-3-(2-(4-methoxyphenyl)hydrazineylidene)chromane-2,4-dione (**4t**)

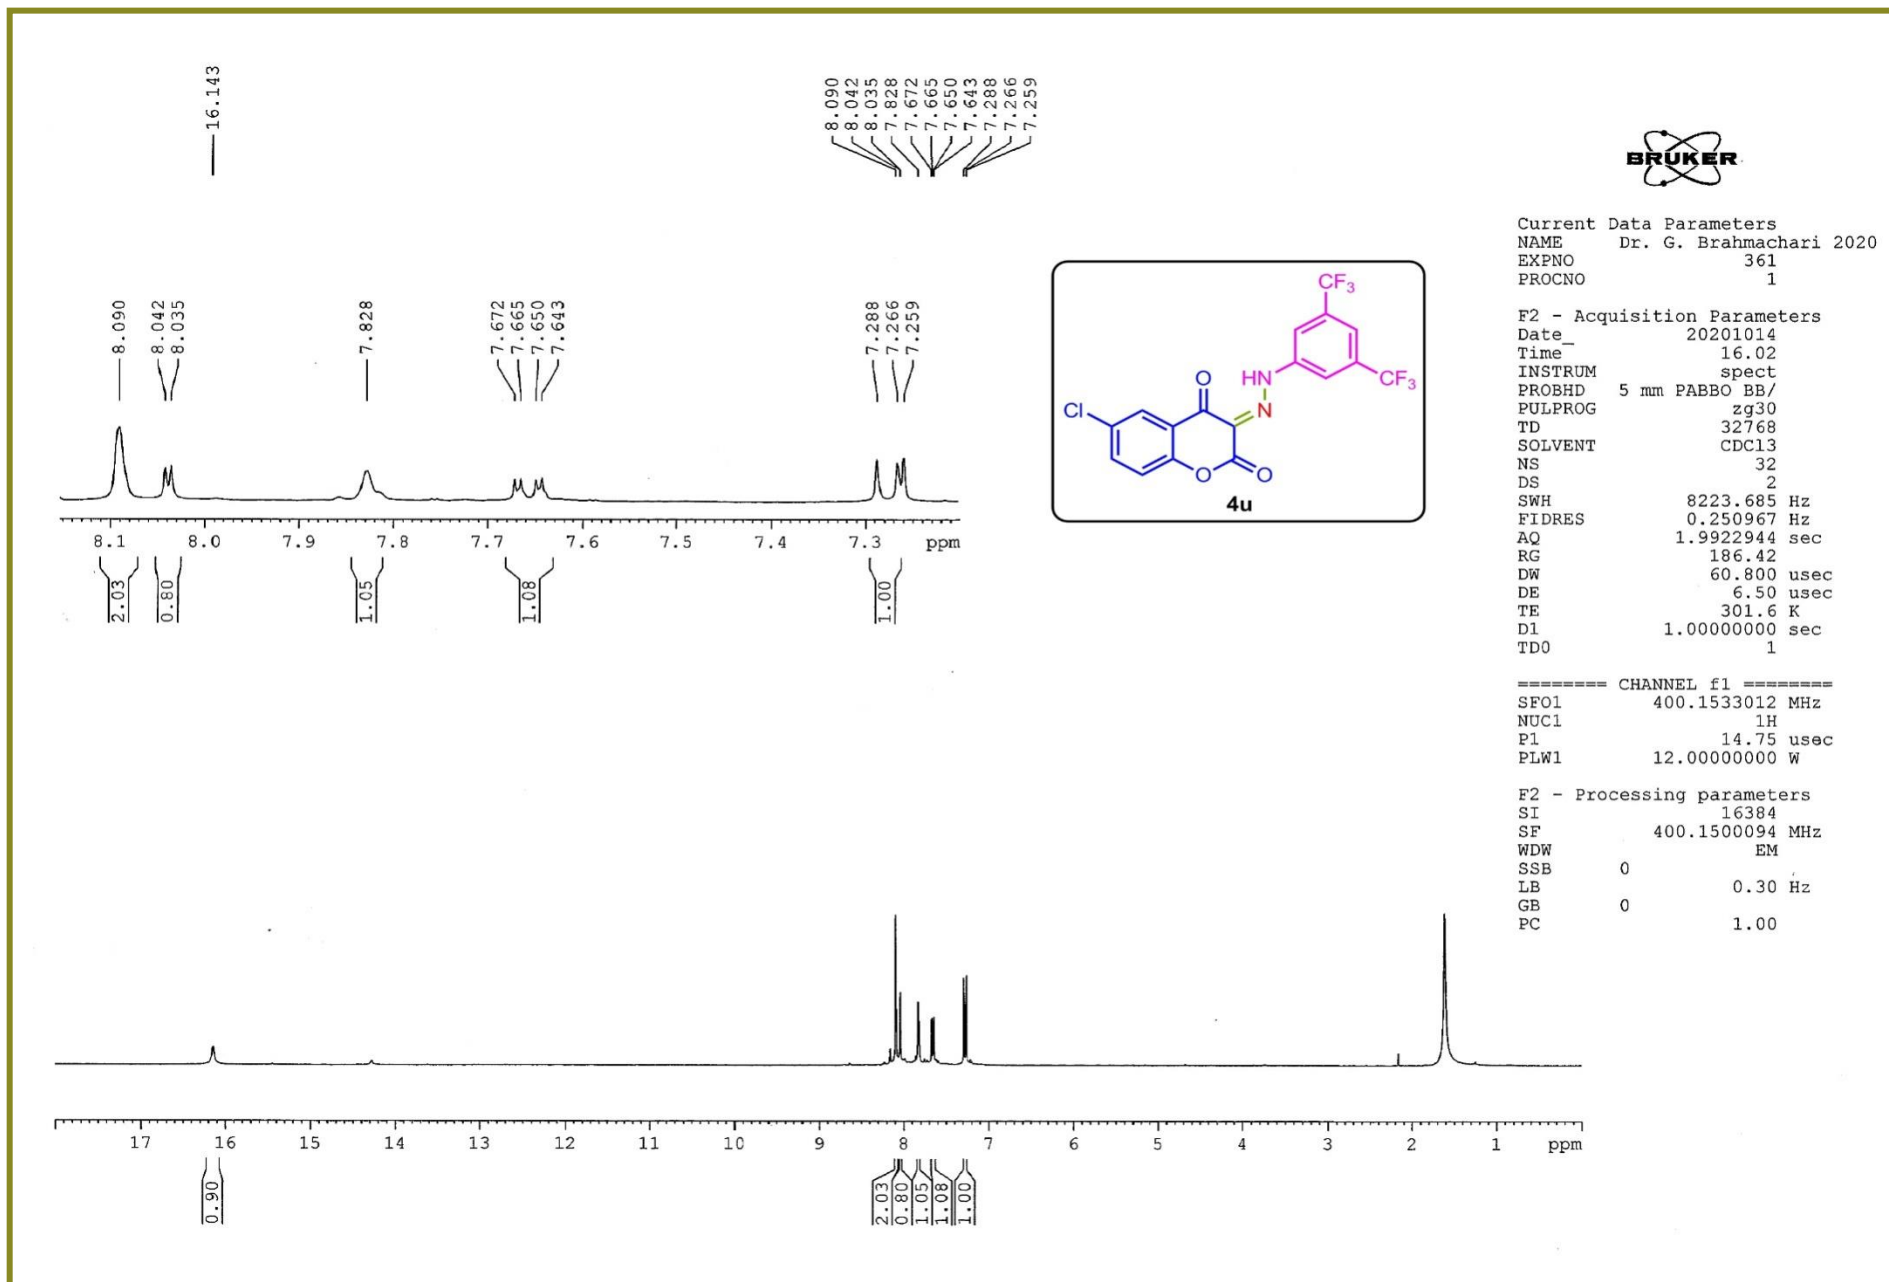

Figure S81. <sup>1</sup>H-NMR spectrum of (*E*)-3-(2-(3,5-bis(trifluoromethyl)phenyl)hydrazineylidene)-6-chlorochromane-2,4-dione (**4u**)

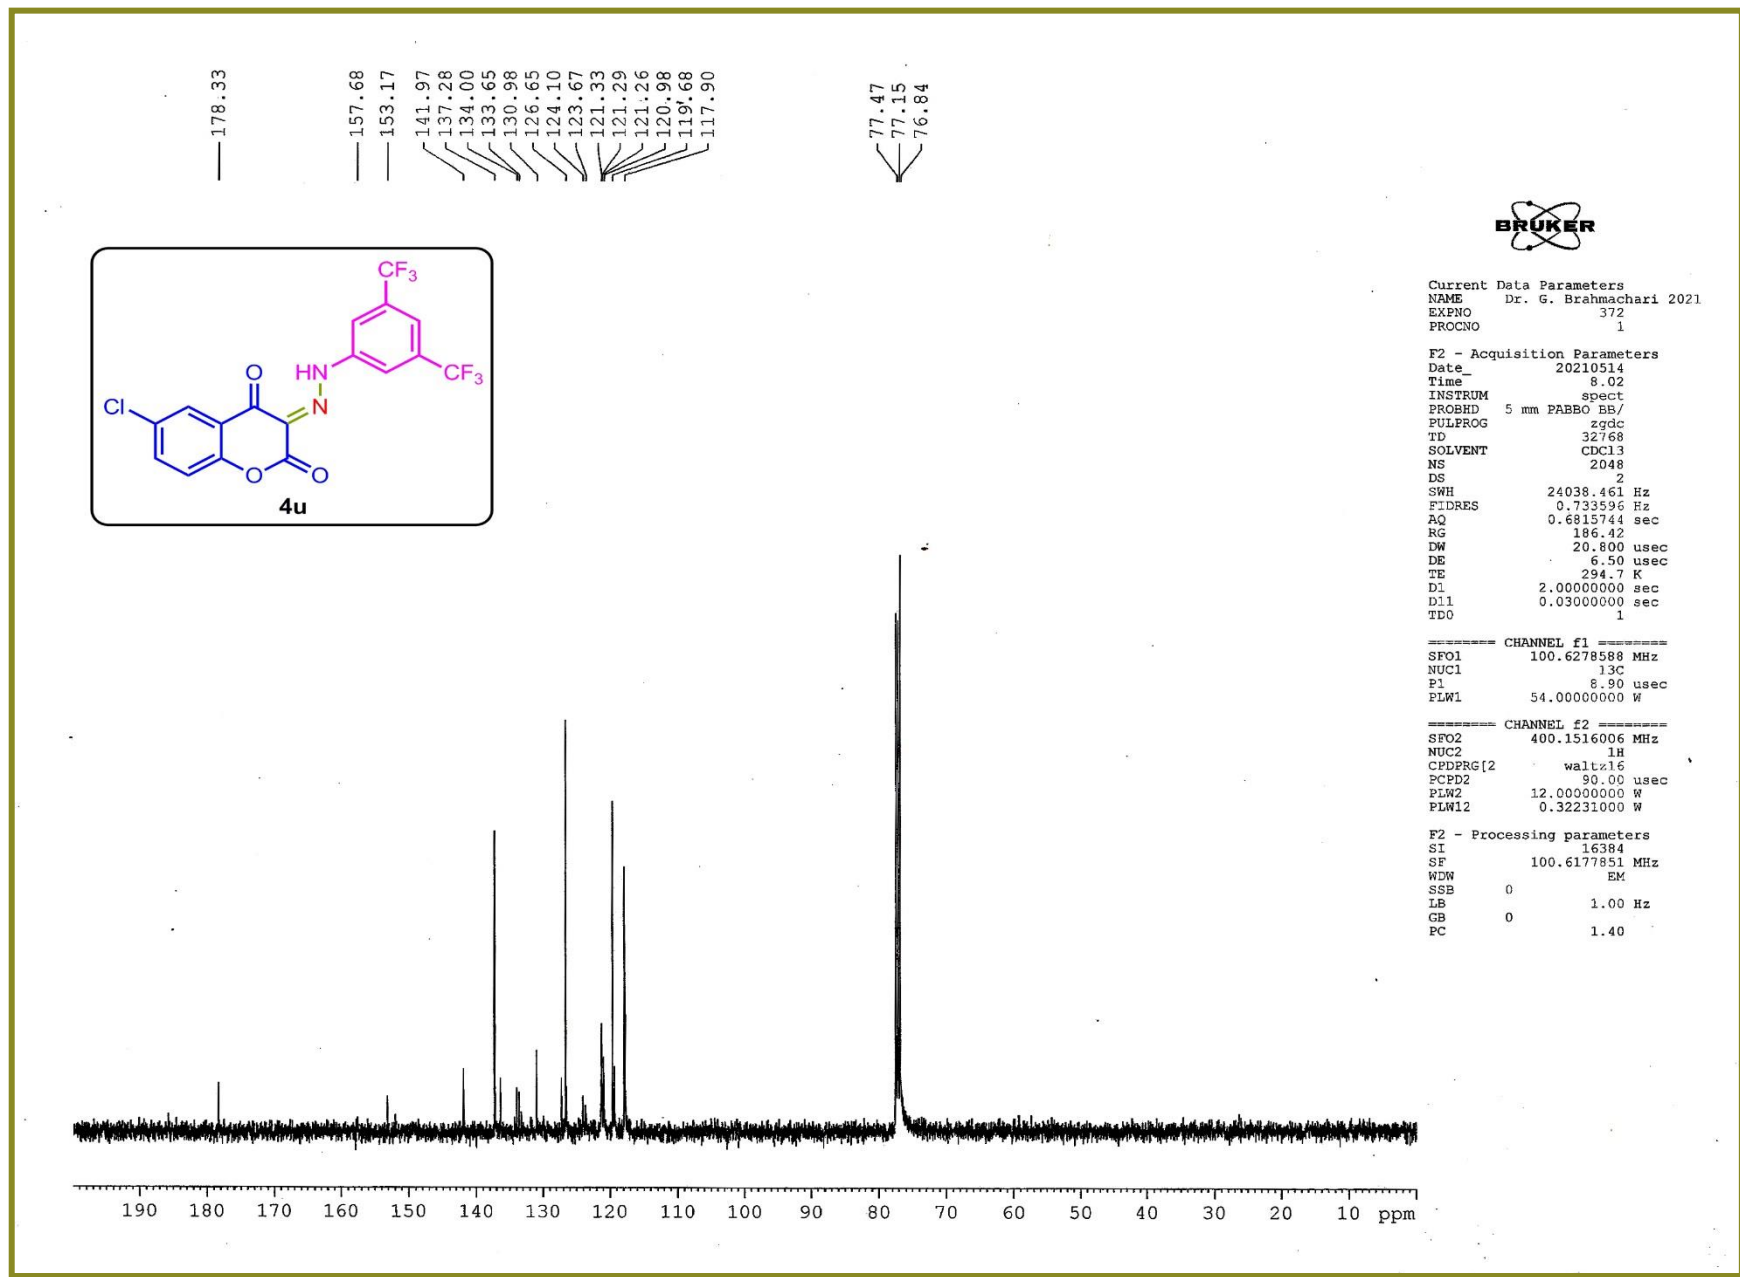

Figure S82. <sup>13</sup>C-NMR spectrum of (*E*)-3-(2-(3,5-bis(trifluoromethyl)phenyl)hydrazineylidene)-6-chlorochromane-2,4-dione (**4u**)



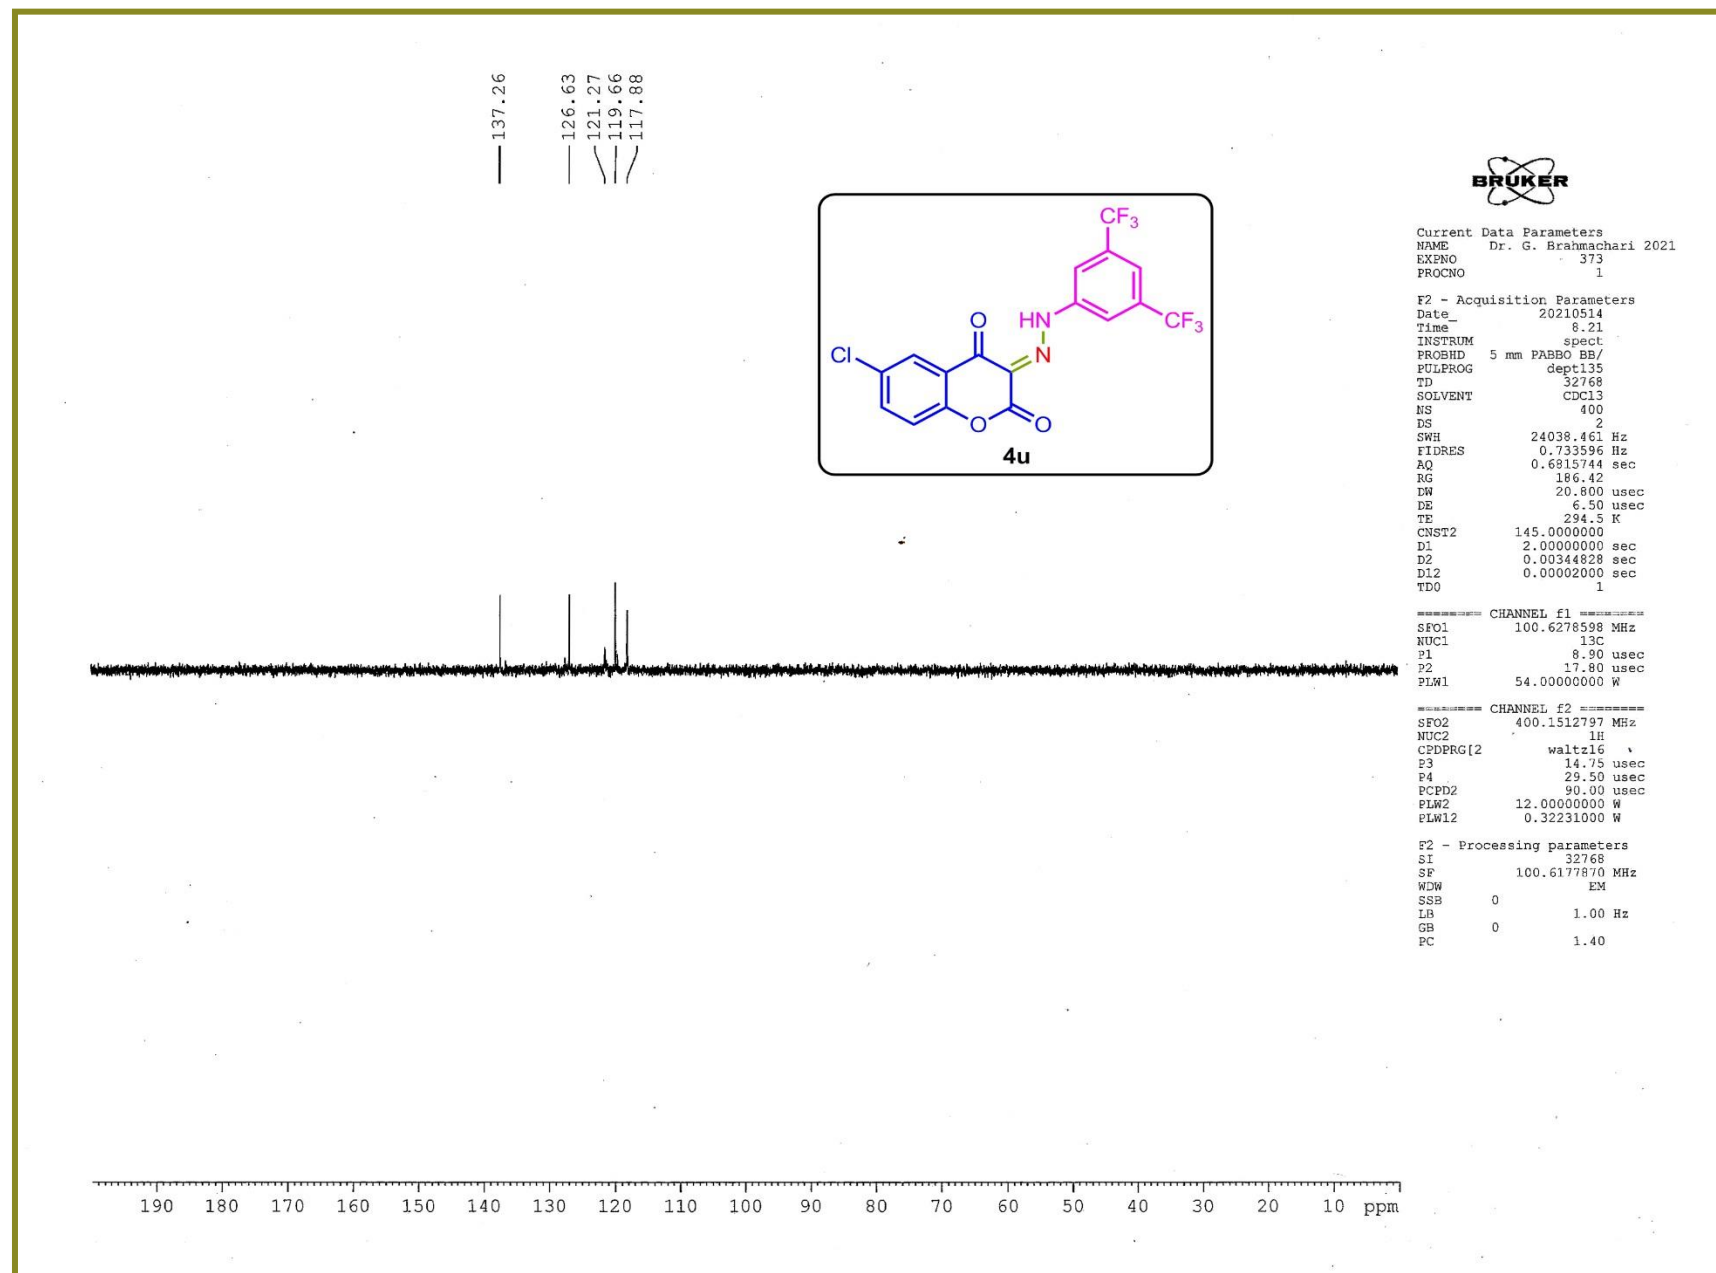

Figure S83. DEPT-135 NMR spectrum of (*E*)-3-(2-(3,5-bis(trifluoromethyl)phenyl)hydrazineylidene)-6-chlorochromane-2,4-dione (**4u**)

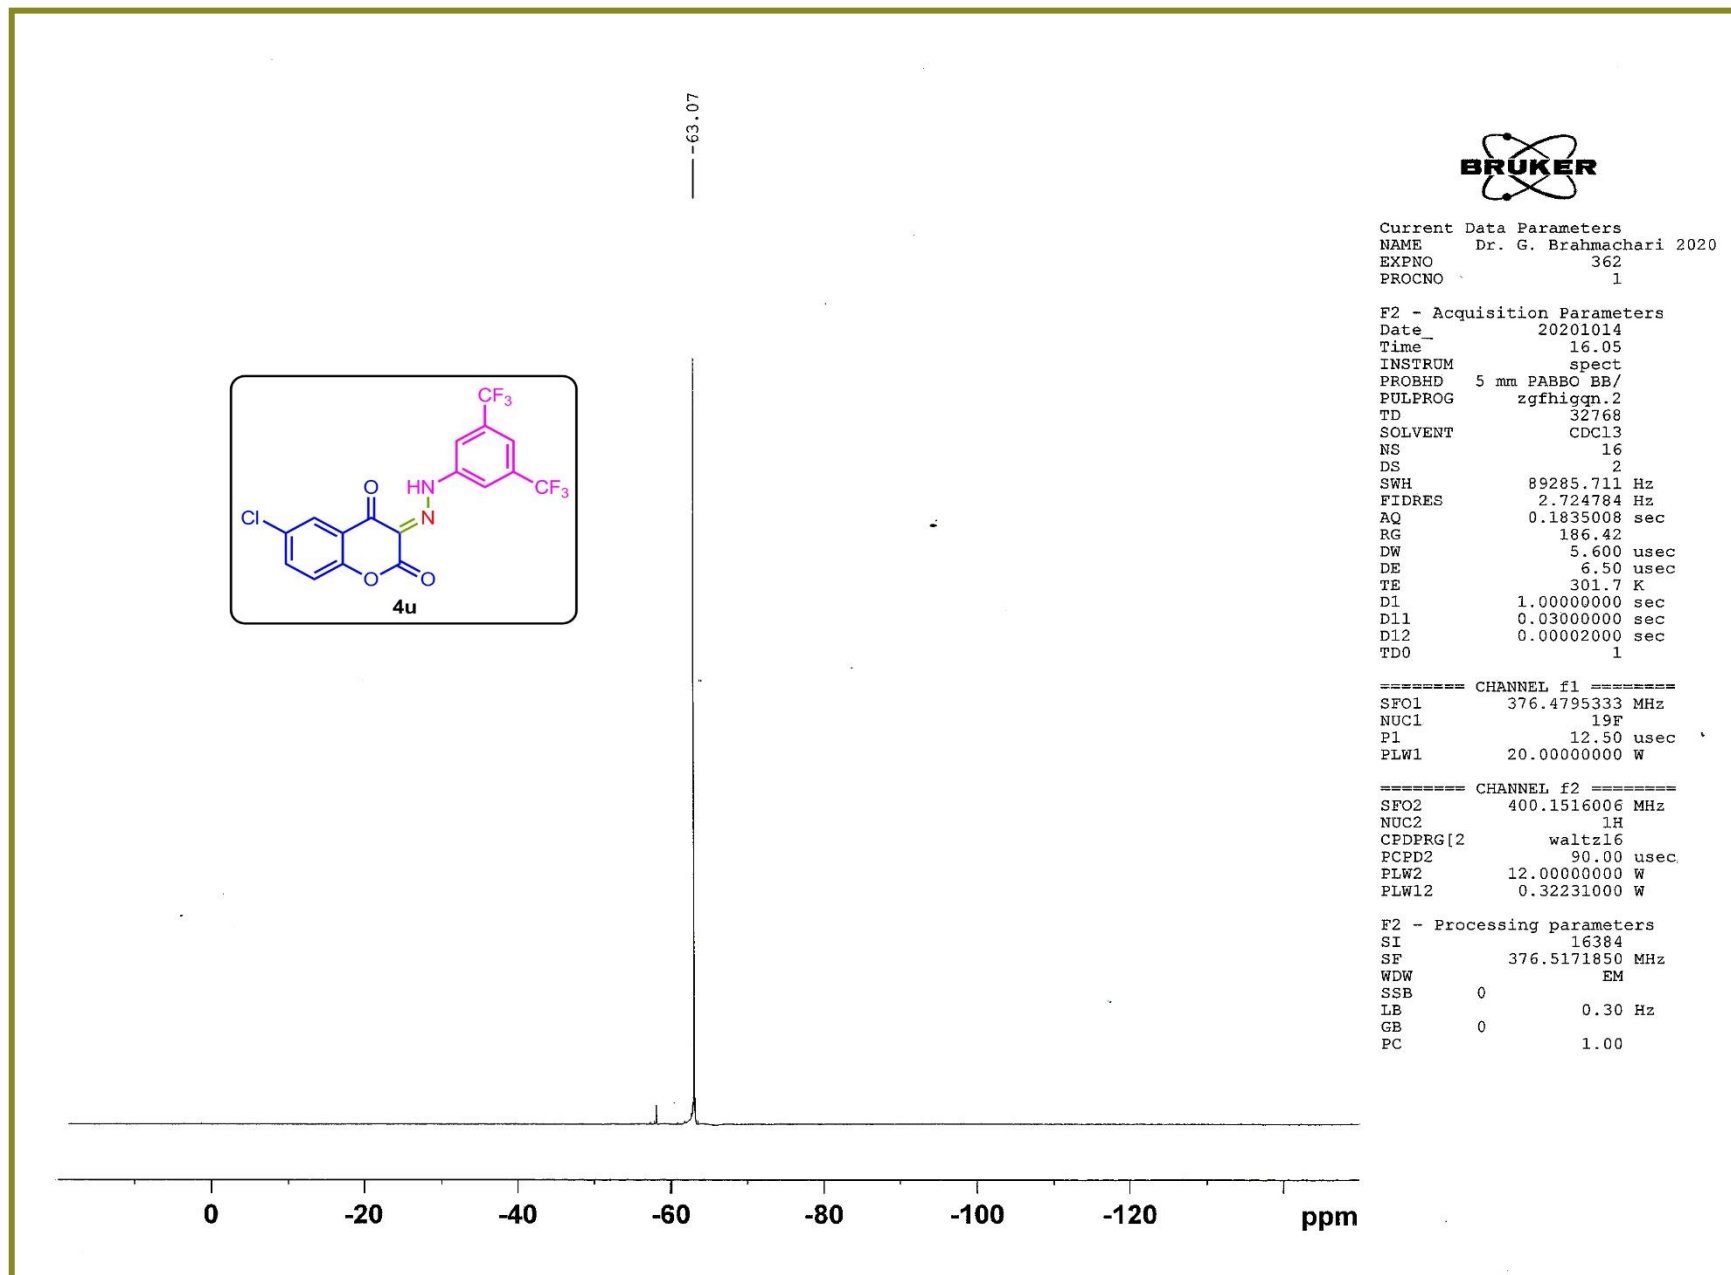

Figure S84.  $^{19}\text{F}$  NMR of (*E*)-3-(2-(3,5-bis(trifluoromethyl)phenyl)hydrazineylidene)-6-chlorochromane-2,4-dione (**4u**)

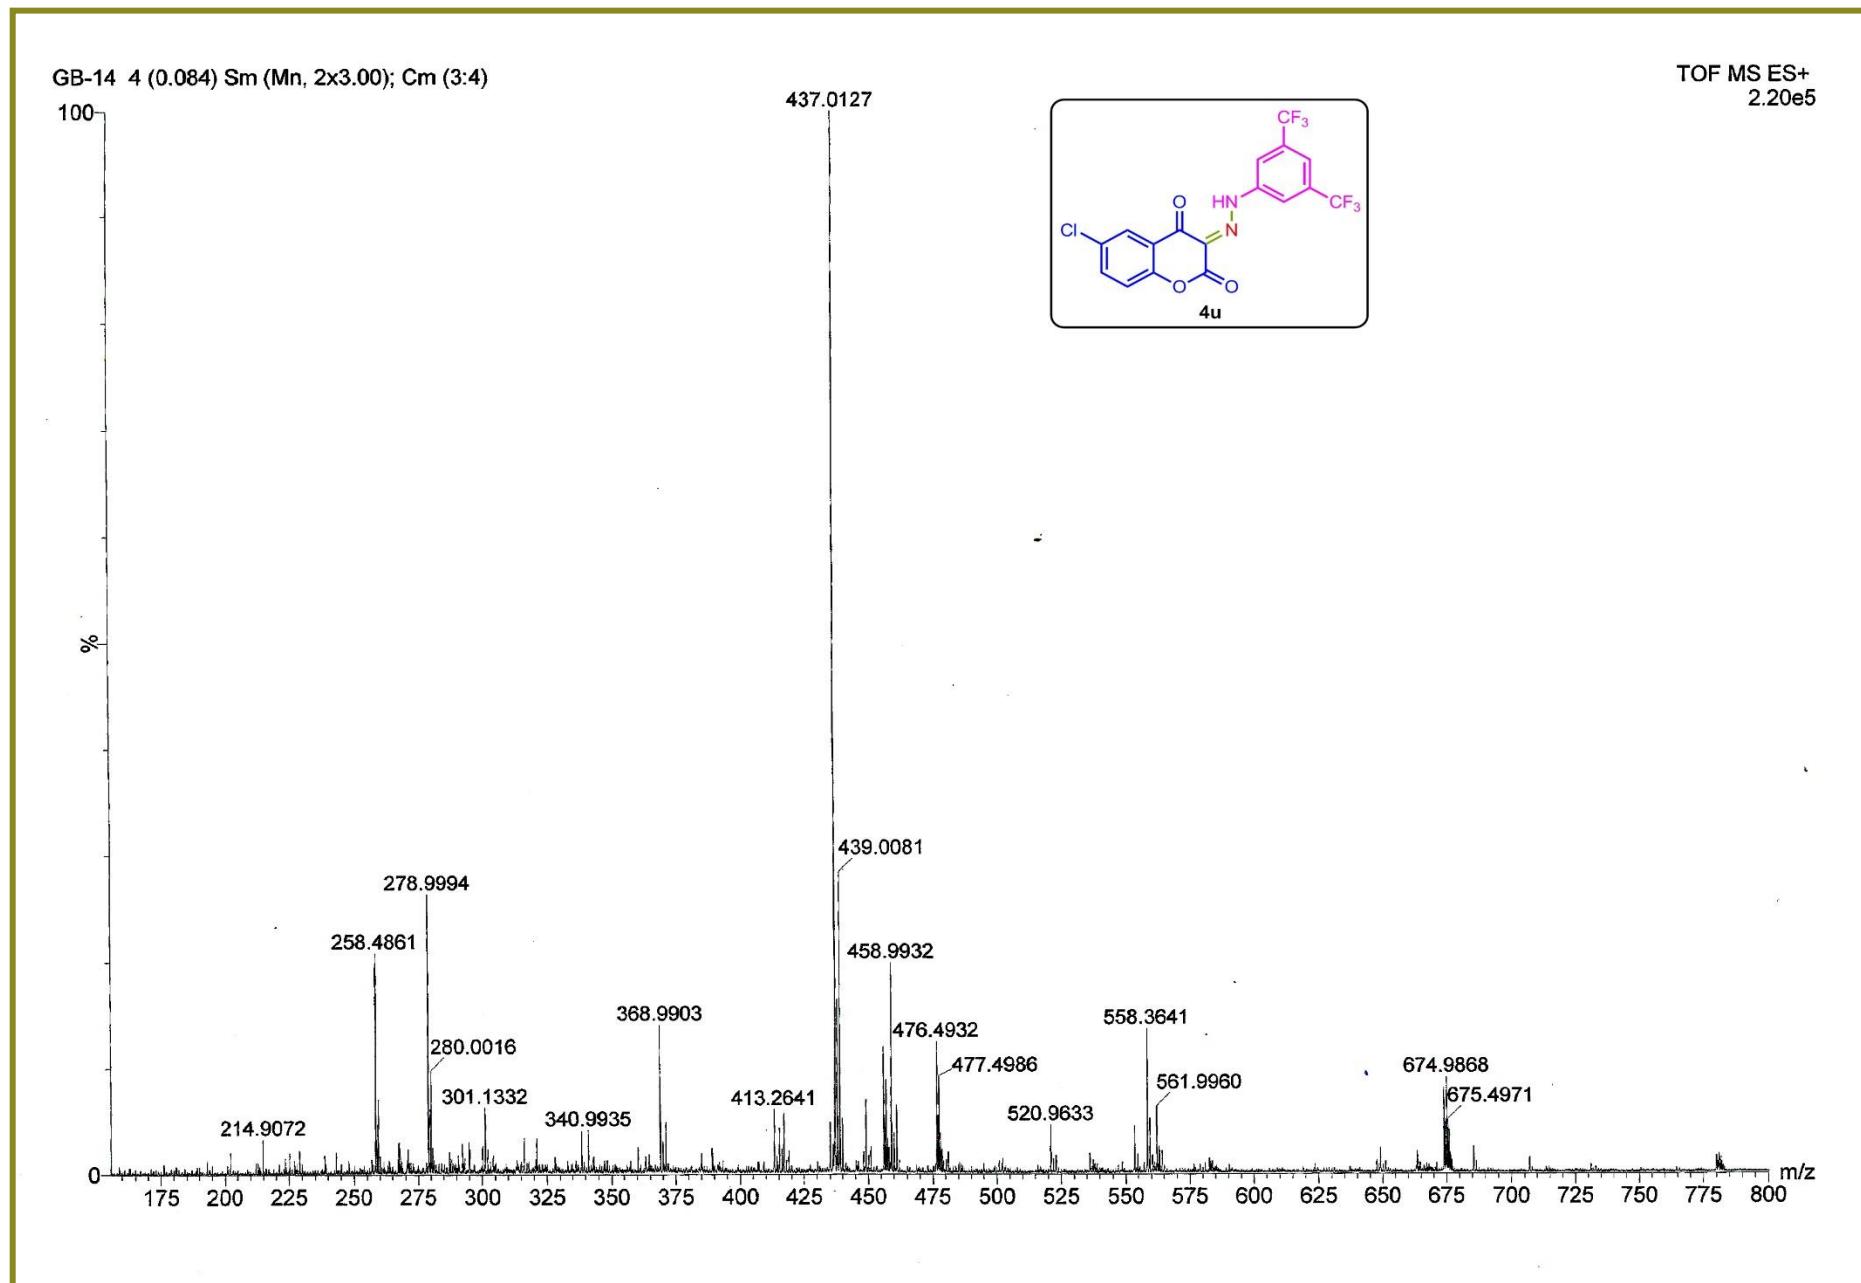

Figure S85.  $^{19}\text{F}$  NMR of (*E*)-3-(2-(3,5-bis(trifluoromethyl)phenyl)hydrazineylidene)-6-chlorochromane-2,4-dione (**4u**)

### 3. Single X-ray crystal structure analysis of (*E*)-3-(2-(3,5-bis(trifluoromethyl)phenyl)hydrazono)chroman-2,4-dione (**4k**)

#### 4.1 Preparation of single crystals of compound **4k**

For preparing single crystals of compound **4k**, 30 mg of the sample was dissolved in 5 mL of commercial dimethyl sulphoxide, and the solution was left for 15 days for slow evaporation at ambient conditions to yield orange block-shaped crystals.

#### 4.2 Single crystal X-ray diffraction studies of compound **4k**: crystal structure determination and refinement

CCDC 2070059 (Compound **4k**) contains the supplementary crystallographic data for this paper. These data can be obtained free of charge from *The Cambridge Crystallographic Data Centre* via [www.ccdc.cam.ac.uk/data\\_request/cif](http://www.ccdc.cam.ac.uk/data_request/cif)

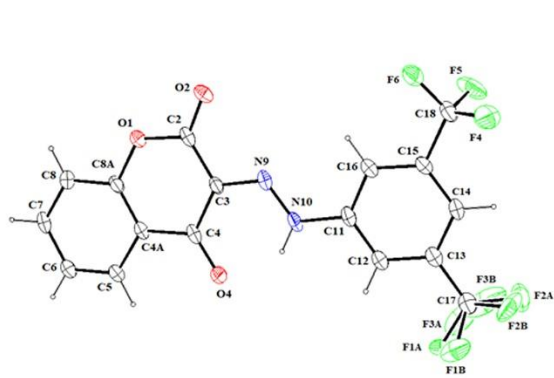

Figure S86a

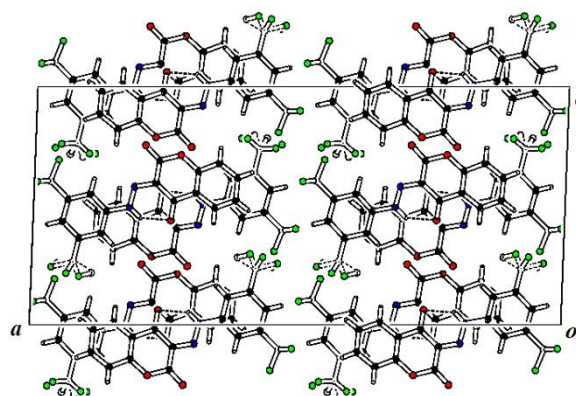

Figure S86b

**Figure S86a** ORTEP view of the molecule, showing the atom-labelling scheme

**Figure S86b.** Packing view of molecules down to b-axis [non-interacting hydrogen atoms are omitted for clarity. Displacement ellipsoids are drawn at the 40% probability level, and H atoms are shown as small spheres of arbitrary radii.

**Table S1. Crystal data and structure refinement for (*E*)-3-(2-(3,5-bis(trifluoromethyl)phenyl)hydrazono)chroman-2,4-dione (**4k**)**

|                      |                                                                             |                |
|----------------------|-----------------------------------------------------------------------------|----------------|
| CCDC Number          | 2070059                                                                     |                |
| Empirical formula    | C <sub>17</sub> H <sub>8</sub> F <sub>6</sub> N <sub>2</sub> O <sub>3</sub> |                |
| Formula weight       | 402.25                                                                      |                |
| Temperature          | 150.01(11) K                                                                |                |
| Wavelength           | 0.71073 Å                                                                   |                |
| Crystal system       | Monoclinic                                                                  |                |
| Space group          | C 2/c                                                                       |                |
| Unit cell dimensions | a = 31.1491(1) Å                                                            | α = 90°        |
|                      | b = 7.2268(4) Å                                                             | β = 92.130(4)° |
|                      | c = 13.9792(7) Å                                                            | γ = 90°        |
| Volume               | 3144.2(3) Å <sup>3</sup>                                                    |                |
| Z                    | 8                                                                           |                |

|                                      |                                             |
|--------------------------------------|---------------------------------------------|
| Density (calculated)                 | 1.700 Mg/m <sup>3</sup>                     |
| Absorption coefficient ( $\mu$ )     | 0.164 mm <sup>-1</sup>                      |
| F(000)                               | 1616                                        |
| Crystal size                         | 0.30 × 0.20 × 0.20 mm <sup>3</sup>          |
| Crystal shape (colour)               | Block (orange)                              |
| Theta range for data collection      | 2.6160 to 27.5610°                          |
| Index ranges                         | -36 ≤ h ≤ 32, -8 ≤ k ≤ 3, -16 ≤ l ≤ 8       |
| Reflections collected                | 4195                                        |
| Independent reflections              | 2733 [R(int) = 0.1022]                      |
| Completeness to theta = 24.998°      | 98.4 %                                      |
| Refinement method                    | Full-matrix least-squares on F <sup>2</sup> |
| Data / restraints / parameters       | 2733 / 0 / 285                              |
| Goodness-of-fit on F <sup>2</sup>    | 1.174                                       |
| Final R indices [I > 2σ(I)]          | R1 = 0.1339, wR2 = 0.3394                   |
| R indices (all data)                 | R1 = 0.1088, wR2 = 0.2891                   |
| Largest diff. peak and hole          | 0.543 and -0.565 e.Å <sup>-3</sup>          |
| Scan mode                            | ω scan                                      |
| θ range for entire data collection   | 2.62° to 27.56°                             |
| Reflections observed (I > 2σ(I))     | 1788                                        |
| R(sigma)                             | 0.0876                                      |
| Structure determination              | Direct methods                              |
| No. of parameters refined            | 285                                         |
| Final residual electron density      | 0.543 and -0.565 e.Å <sup>-3</sup>          |
| Software for geometry calculation    | WinGX [1]                                   |
| Software for structure solution:     | SHELXS-97 [4]                               |
| Software for refinement:             | SHELXL-97[5]                                |
| Software for molecular plotting:     | Ortep3 [6], PLATON[3]                       |
| Software for geometrical calculation | PARST [2]                                   |

#### 4. Calculation of E-factors for all the synthesized compounds (4a-4u)

The following formulae were used for calculating E-factor.<sup>[7-15]</sup> Calculated data for compounds **4a** – **4u** are presented in Table S2.

$$\text{E-factor} = \frac{\text{Total mass of wastes}}{\text{Mass of product}} = \frac{\text{Mass of raw materials} - \text{Mass of product}}{\text{Mass of product}}$$

#### Respective amounts:

*Reagents:* 4-Hydroxycoumarin: 0.486g (MW: 162.14); 6-chloro-4-hydroxy-2*H*-chromen-2-one: 0.590g (MW: 196.59); 4-hydroxy-6-methyl-2*H*-chromen-2-one: 0.529g (MW: 176.17); 4-hydroxy-7-methyl-2*H*-chromen-2-one: 0.529g (MW: 176.17); 4-hydroxy-7-methoxy-2*H*-chromen-2-one: 0.577g (MW: 192.17); aniline: 0.279g (MW: 93.13); *p*-toluidine: 0.321g (MW: 107.15); *p*-anisidine: 0.369g (MW: 123.15); 4-(methylthio)aniline: 0.418g (MW: 139.22); 3-(methylthio)aniline: 0.418g (MW: 139.22); *p*-bromoaniline: 0.516g (MW: 172.02); 2,5-dichloroaniline 0.486g (MW: 162.01); 4-trifluoromethylaniline: 0.483g (MW: 161.12); 3,4-

bis(trifluoromethyl)aniline: 0.387g (MW: 229.12); 4-trifluoromethoxyaniline: 0.531g (MW: 177.12); (trifluoromethylthio)aniline: 0.580g (MW: 193.19); 4-nitroaniline: 0.414g (MW: 138.13); 2-nitroaniline: 0.414g (MW: 138.13); *tert*-butyl nitrite: 0.309g (MW: 103.12).

**Products** (Molecular weight, MW): **4a**: 0.702g (MW: 266.26); **4b**: 0.880g (MW: 345.15); **4c**: 0.702g (MW: 280.28); **4d**: 0.835g (MW: 296.28); **4e**: 0.758g (MW: 312.34); **4f**: 0.786g (MW: 312.34); **4g**: 0.883g (MW: 311.25); **4h**: 0.868g (MW: 311.25); **4i**: 0.914g (MW: 350.25); **4j**: 0.922g (MW: 366.31); **4k**: 1.097g (MW: 402.25); **4l**: 0.884g (MW: 435.14); **4m**: 0.723g (MW: 294.31); **4n**: 0.772g (MW: 310.31); **4o**: 0.923g (MW: 380.34); **4p**: 0.874g (MW: 364.28); **4q**: 0.750g (MW: 294.31); **4r**: 0.841g (MW: 326.31); **4s**: 0.775g (MW: 314.73); **4t**: 0.775g (MW: 330.72); **4u**: 1.062g (MW: 436.69).

**Documentation of Calculations of Green Metric (E-factor) for One Representative Entry, viz. (E)-3-(2-phenylhydrazono)chroman-2,4-dione (4a):**

$$\begin{aligned} \text{E-factor} &= \frac{\text{Mass of wastes}}{\text{Mass of product}} = \frac{\text{Mass of raw materials} - \text{Mass of product}}{\text{Mass of product}} \\ &= \frac{(0.486 \text{ g} + 0.279 \text{ g} + 0.309 \text{ g}) - 0.702 \text{ g}}{0.702 \text{ g}} = 0.53 \text{ (g/g)} \end{aligned}$$

**Table S2.** Calculated E-factors for the compounds (**4a** – **4u**)

| Sl. No | Product   | E-Factor (g/g) |
|--------|-----------|----------------|
| 1      | <b>4a</b> | 0.53           |
| 2      | <b>4b</b> | 0.49           |
| 3      | <b>4c</b> | 0.59           |
| 4      | <b>4d</b> | 0.39           |
| 5      | <b>4e</b> | 0.60           |
| 6      | <b>4f</b> | 0.54           |
| 7      | <b>4g</b> | 0.37           |
| 8      | <b>4h</b> | 0.39           |
| 9      | <b>4i</b> | 0.45           |
| 10     | <b>4j</b> | 0.49           |
| 11     | <b>4k</b> | 0.35           |
| 12     | <b>4l</b> | 0.45           |
| 13     | <b>4m</b> | 0.59           |
| 14     | <b>4n</b> | 0.56           |
| 15     | <b>4o</b> | 0.54           |
| 16     | <b>4p</b> | 0.57           |
| 17     | <b>4q</b> | 0.55           |
| 18     | <b>4r</b> | 0.49           |
| 19     | <b>4s</b> | 0.57           |
| 20     | <b>4t</b> | 0.64           |
| 21     | <b>4u</b> | 0.49           |

#Lower is the value, greener is the process

## 5. References

- (1) L. J. Farrugia, *J. Appl. Crystallogr.*, 1999, **32**, 837.
  - (2) M. Nardelli, *J. Appl. Crystallogr.*, 1995, **28**, 659.
  - (3) A. L. Spek, *Acta Crystallogr. D.*, 2009, **65**, 148.
  - (4) G. M. Sheldrick, SHELXS97, Program for the solution of the crystal structure, University of Gottingen, Germany, 1997.
  - (5) G. M. Sheldrick, SHELXL97, University of Göttingen, Germany, 1997.
  - (6) L. J. Farrugia, *J Appl Crystallogr.*, 1997, **30**, 565.
  - (7) R. A. Sheldon, *ACS Sustainable Chem. Eng.*, 2018, **6**, 32.
  - (8) S. Abou-Shehada, P. Mampuy, B. U. W. Maes, J. Clarkand, H. L. Summerton, *Green Chem.*, 2017, **19**, 249.
  - (9) N. J. Willis, C. A. Fisher, C. M. Alder, A. Harsanyi, L. Shukla, J. P. Adams, G. Sandford, *Green Chem.*, 2016, **18**, 1313.
  - (10) F. Roschangar, A. Sheldon, C. H. Senanayake, *Green Chem.*, 2015, **17**, 752.
  - (11) C. Jimenez-Gonzalez, C. S. Ponder, Q. B. Broxterman, J. B. Manley, *Org. Process Res. Dev.*, 2011, **15**, 912.
  - (12) J. Augé, *Green Chem.*, 2008, **10**, 225.
  - (13) R. A. Sheldon, *Green Chem.*, 2007, **9**, 1273.
  - (14) D. J. C. Constable, A. D. Curzons, V. L. Cunningham, *Green Chem.*, 2002, **4**, 521.
  - (15) R. A. Sheldon, *Chem. Ind.*, 1992, **23**, 903.
-
